# Supplementary material
Source: PubMed Central journal article supplement (PMC4303631)
Supplement: ismej2014134x2.pdf [file ismej2014134x2.pdf]

Table with 15 columns: ID, Gene Name, Description, and various numerical values representing gene expression or activity. The table lists genes from RC423 to RC42600. The descriptions include various enzyme names, protein families, and cellular processes. The numerical values are arranged in a grid format, with some cells highlighted in red, orange, and yellow.
