# Supplementary material
Source: PubMed Central journal article supplement (PMC4303631)
Supplement: ismej2014134x3.pdf [file ismej2014134x3.pdf]

Table S6: COG categories, genomic islands, normalized read counts (NPKM) of the transcripts at stations 9 (bloom,night) and 13 (bloom, day) and differences between night and day

| locus_tag    | start | stop  | annotation                                              | COG ID  | COG category | genomic island | NPKM station 9 bloom-night | NPKM station 13 bloom-day | NPKM difference night-day |
|--------------|-------|-------|---------------------------------------------------------|---------|--------------|----------------|----------------------------|---------------------------|---------------------------|
| RCA23_c00010 | 101   | 1447  | chromosomal replication initiator protein DnaA          | COG0593 | L            |                | 617                        | 502                       | 115                       |
| RCA23_c00020 | 1550  | 2668  | DNA polymerase III beta subunit DnaN                    | COG0592 | L            |                | 605                        | 575                       | 30                        |
| RCA23_c00030 | 2778  | 3800  | DNA replication and repair protein RecF                 | COG1195 | L            |                | 358                        | 419                       | -61                       |
| RCA23_c00040 | 3797  | 4417  | hypothetical protein, LysE type translocator            | COG1280 | E            |                | 455                        | 635                       | -180                      |
| RCA23_c00050 | 4567  | 6984  | DNA gyrase subunit B                                    | COG0187 | L            |                | 599                        | 596                       | 3                         |
| RCA23_c00060 | 7002  | 8384  | FAD dependent oxidoreductase                            | COG0665 | E            |                | 339                        | 421                       | -82                       |
| RCA23_c00070 | 9282  | 8392  | hypothetical protein, rhodanese-like sulphurtransferase | COG1054 | R            |                | 414                        | 392                       | 22                        |
| RCA23_c00080 | 9413  | 10003 | pyrazinamidase/nicotinamidase PncA                      | COG1335 | Q            |                | 456                        | 502                       | -46                       |
| RCA23_c00090 | 10003 | 11295 | nicotinate phosphoribosyltransferase PncB               | COG1488 | H            |                | 608                        | 548                       | 60                        |
| RCA23_c00100 | 12224 | 11292 | aminoglycoside phosphotransferase                       | COG2334 | R            |                | 392                        | 456                       | -64                       |
| RCA23_c00110 | 13477 | 12221 | putative aminotransferase class III                     | COG0160 | E            |                | 255                        | 339                       | -84                       |
| RCA23_c00120 | 13889 | 13467 | putative peptide chain release factor                   | COG1186 | J            |                | 432                        | 659                       | -227                      |
| RCA23_c00130 | 14772 | 14128 | hypothetical integral membrane protein                  | COG1738 | S            |                | 378                        | 472                       | -94                       |
| RCA23_c00140 | 15799 | 14879 | penicillin-insensitive murein endopeptidase MepA        | COG3770 | M            |                | 424                        | 459                       | -35                       |
| RCA23_c00150 | 17181 | 15796 | putative MFS-type transporter                           | COG2270 | R            |                | 588                        | 535                       | 53                        |
| RCA23_c00160 | 17672 | 17241 | hypothetical protein                                    | COG0824 | R            |                | 354                        | 357                       | -3                        |
| RCA23_c00170 | 17836 | 18201 | hypothetical protein, YGGT family                       | COG0762 | S            |                | 446                        | 469                       | -23                       |
| RCA23_c00180 | 18217 | 20277 | ATP-dependent DNA helicase RecQ                         | COG0514 | L            |                | 362                        | 427                       | -65                       |
| RCA23_c00190 | 20300 | 21073 | hypothetical protein DUF328                             | COG3022 | S            |                | 375                        | 423                       | -48                       |
| RCA23_c00200 | 21576 | 21070 | isopentenyl-diphosphate delta-isomerase ldi             | COG1443 | I            |                | 495                        | 470                       | 25                        |
| RCA23_c00210 | 21812 | 23056 | 5-aminolevulinate synthase HemaA                        | COG0156 | H            |                | 577                        | 477                       | 100                       |
| RCA23_c00220 | 23097 | 23540 | cytochrome c2                                           | COG3474 | C            |                | 489                        | 500                       | -11                       |
| RCA23_c00230 | 24777 | 23602 | acetyl-CoA acetyltransferase PhaA                       | COG0183 | I            |                | 276                        | 293                       | -17                       |
| RCA23_c00240 | 24942 | 27992 | DNA polymerase III 2 alpha subunit DnaE                 | COG0587 | L            |                | 333                        | 404                       | -71                       |

|              |       |       |                                                           |         |   |     |     |      |
|--------------|-------|-------|-----------------------------------------------------------|---------|---|-----|-----|------|
| RCA23_c00250 | 28122 | 28625 | transcription antitermination protein NusG                | COG0250 | K | 338 | 431 | -93  |
| RCA23_c00260 | 29748 | 28636 | putative lytic murein transglycosylase                    | COG2951 | M | 373 | 308 | 65   |
| RCA23_c00270 | 31991 | 29745 | putative ribonuclease R                                   | COG0557 | K | 415 | 447 | -32  |
| RCA23_c00280 | 32084 | 32503 | hypothetical protein DUF461                               | COG2847 | S | 758 | 537 | 221  |
| RCA23_c00290 | 33615 | 32512 | chorismate synthase AroC                                  | COG0082 | E | 389 | 392 | -3   |
| RCA23_c00300 | 34180 | 34422 | hypothetical protein                                      |         |   | 461 | 357 | 104  |
| RCA23_c00310 | 34649 | 35638 | thiamine-binding periplasmic protein ThiB                 | COG4143 | H | 445 | 484 | -39  |
| RCA23_c00320 | 35638 | 37182 | thiamine transport system permease protein ThiP           | COG1178 | P | 287 | 490 | -203 |
| RCA23_c00330 | 37151 | 37867 | thiamine import ATP-binding protein ThiQ                  | COG3840 | H | 337 | 496 | -159 |
| RCA23_c00340 | 38720 | 37920 | cytochrome c1                                             | COG2857 | C | 615 | 381 | 234  |
| RCA23_c00350 | 40072 | 38735 | cytochrome b                                              | COG1290 | C | 894 | 546 | 348  |
| RCA23_c00360 | 40644 | 40072 | ubiquinol-cytochrome c reductase iron-sulfur subunit PetA | COG0723 | C | 566 | 383 | 183  |
| RCA23_c00370 | 41451 | 40837 | hypothetical protein, glutathione S-transferase           | COG0625 | O | 244 | 366 | -122 |
| RCA23_c00380 | 42523 | 41495 | inositol 2-dehydrogenase IdhA                             | COG0673 | R | 282 | 357 | -75  |
| RCA23_c00390 | 42704 | 44050 | protein PmbA                                              | COG0312 | R | 317 | 402 | -85  |
| RCA23_c00400 | 44043 | 44810 | putative inositol monophosphatase                         | COG0483 | G | 442 | 524 | -82  |
| RCA23_c00410 | 44819 | 45955 | putative 3-deoxy-D-manno-octulosonic-acid transferase     | COG1519 | M | 381 | 447 | -66  |
| RCA23_c00420 | 45952 | 46938 | tetraacyldisaccharide 4'-kinase LpxK                      | COG1663 | M | 299 | 391 | -92  |
| RCA23_c00430 | 47600 | 46941 | hypothetical protein, thioredoxin                         | COG1651 | O | 615 | 604 | 11   |
| RCA23_c00440 | 48123 | 47602 | hypothetical protein DUF721                               | COG5389 | S | 395 | 653 | -258 |
| RCA23_c00450 | 48220 | 49254 | A/G-specific adenine glycosylase YfhQ                     | COG1194 | L | 216 | 265 | -49  |
| RCA23_c00460 | 49425 | 50567 | alkane 1-monooxygenase AlkB                               |         |   | 705 | 622 | 83   |
| RCA23_c00470 | 51766 | 50654 | modification methylase CcrM                               | COG0863 | L | 547 | 559 | -12  |
| RCA23_c00480 | 52492 | 51857 | ribonuclease HII                                          | COG0164 | L | 826 | 659 | 167  |
| RCA23_c00490 | 52617 | 53405 | putative exodeoxyribonuclease III                         | COG0708 | L | 412 | 409 | 3    |
| RCA23_c00500 | 53466 | 54383 | hypothetical protein, thioredoxin                         | COG3118 | O | 360 | 421 | -61  |
| RCA23_c00510 | 54410 | 55051 | putative ATP-dependent protease La (LON)                  | COG2802 | R | 461 | 381 | 80   |
| RCA23_c00520 | 55048 | 55233 | hypothetical protein, Trm112p-like                        | COG2835 | S | 557 | 439 | 118  |
| RCA23_c00530 | 56447 | 55230 | putative 2-octaprenyl-6-methoxyphenol hydroxylase         | COG0654 | H | 336 | 427 | -91  |
| RCA23_c00540 | 56547 | 57857 | glutamyl-tRNA(Gln) amidotransferase subunit A             | COG0154 | J | 218 | 476 | -258 |

|              |       |       |                                                              |         |   |      |     |     |      |
|--------------|-------|-------|--------------------------------------------------------------|---------|---|------|-----|-----|------|
| RCA23_c00550 | 57922 | 59085 | LL-diaminopimelate aminotransferase DapL                     | COG0436 | E |      | 518 | 488 | 30   |
| RCA23_c00560 | 59099 | 61888 | putative DNA translocase FtsK                                | COG1674 | D |      | 506 | 510 | -4   |
| RCA23_c00570 | 61992 | 62549 | putative outer membrane lipoprotein carrier protein LolA     | COG2834 | M |      | 382 | 413 | -31  |
| RCA23_c00580 | 63223 | 62720 | hypothetical protein                                         | COG4764 | S |      | 478 | 353 | 125  |
| RCA23_c00590 | 63513 | 63836 | hemimethylated DNA-binding protein, YccV like                | COG3785 | S |      | 588 | 541 | 47   |
| RCA23_c00600 | 65410 | 63833 | putative gamma-glutamyltransferase ywrD                      | COG0405 | E |      | 253 | 306 | -53  |
| RCA23_c00610 | 65571 | 66749 | acetyl-CoA acetyltransferase ThIA                            | COG0183 | I |      | 289 | 358 | -69  |
| RCA23_c00620 | 66761 | 67216 | hypothetical protein                                         | COG1956 | T |      | 801 | 697 | 104  |
| RCA23_c00630 | 67302 | 67871 | putative HTH-type transcriptional regulator                  | COG1396 | K |      | 624 | 670 | -46  |
| RCA23_c00640 | 67871 | 68488 | hypothetical protein, homoserine/homoserine lactone efflux   | COG1280 | E |      | 417 | 485 | -68  |
| RCA23_c00650 | 68502 | 69128 | LysE-type translocator                                       | COG1280 | E |      | 274 | 391 | -117 |
| RCA23_c00660 | 69140 | 71587 | dimethylglycine dehydrogenase                                | COG0404 | E |      | 513 | 451 | 62   |
| RCA23_c00670 | 71603 | 72469 | putative homocysteine S-methyltransferase                    | COG2040 | E |      | 334 | 377 | -43  |
| RCA23_c00680 | 72474 | 72929 | pyridoxamine 5'-phosphate oxidase-like protein, FMN-binding  | COG3576 | R |      | 400 | 404 | -4   |
| RCA23_c00690 | 72966 | 75419 | sarcosine dehydrogenase                                      | COG0404 | E |      | 503 | 505 | -2   |
| RCA23_c00700 | 75596 | 76150 | hypothetical protein                                         | COG0790 | R |      | 229 | 273 | -44  |
| RCA23_c00710 | 77326 | 76202 | putative agmatine deiminase AguA                             | COG2957 | E |      | 244 | 302 | -58  |
| RCA23_c00720 | 78340 | 77450 | Cl <sup>-</sup> channel, voltage-gated family protein        | COG0038 | P |      | 169 | 179 | -10  |
| RCA23_c00730 | 79210 | 78368 | Cl <sup>-</sup> channel, voltage-gated family protein        | COG0038 | P |      | 284 | 229 | 55   |
| RCA23_c00750 | 79638 | 80468 | diaminopimelate epimerase DapF                               | COG0253 | E | GI 1 | 356 | 453 | -97  |
| RCA23_c00760 | 80465 | 81721 | (dimethylallyl)adenosine tRNA methylthiotransferase MiaB     | COG0621 | J | GI 1 | 300 | 392 | -92  |
| RCA23_c00770 | 81775 | 82368 | hypothetical protein, glutathione S-transferase              | COG0625 | O | GI 1 | 340 | 473 | -133 |
| RCA23_c00780 | 83403 | 82369 | HTH-type transcriptional regulator, LacI family              | COG1609 | K | GI 1 | 392 | 377 | 15   |
| RCA23_c00790 | 84698 | 84859 | hypothetical protein                                         |         |   | GI 1 | 512 | 328 | 184  |
| RCA23_c00800 | 85627 | 85304 | hypothetical protein                                         | COG4274 | S | GI 1 | 503 | 298 | 205  |
| RCA23_c00810 | 86298 | 86852 | hypothetical protein, phosphoglycerate mutase-like           | COG0406 | G | GI 1 | 577 | 360 | 217  |
| RCA23_c00820 | 86971 | 87357 | hypothetical protein                                         | COG0790 | R | GI 1 | 602 | 405 | 197  |
| RCA23_c00830 | 87971 | 87558 | hypothetical protein, glyoxalase/bleomycin resistance protei | COG0346 | E | GI 1 | 350 | 319 | 31   |
| RCA23_c00840 | 88760 | 88251 | putative phage integrase                                     | COG4974 | L | GI 1 | 284 | 247 | 37   |
| RCA23_c00850 | 89246 | 89632 | hypothetical protein                                         |         |   | GI 1 | 12  | 10  | 2    |

|              |        |        |                                                          |         |   |      |     |     |      |
|--------------|--------|--------|----------------------------------------------------------|---------|---|------|-----|-----|------|
| RCA23_c00860 | 89849  | 90679  | hypothetical protein                                     |         |   | GI 1 | 44  | 43  | 1    |
| RCA23_c00870 | 92517  | 91066  | putative endonuclease                                    |         |   | GI 1 | 1   | 0   | 1    |
| RCA23_c00880 | 93431  | 93994  | DNA integration/recombination/inversion protein          | COG1961 | L | GI 1 | 253 | 243 | 10   |
| RCA23_c00890 | 94002  | 94223  | hypothetical protein                                     |         |   | GI 1 | 529 | 399 | 130  |
| RCA23_c00900 | 94400  | 95290  | hypothetical protein, peptidoglycan binding-like         |         |   | GI 1 | 0   | 0   | 0    |
| RCA23_c00910 | 95706  | 96575  | hypothetical protein                                     |         |   | GI 1 | 28  | 29  | -1   |
| RCA23_c00920 | 98235  | 96589  | putative phage integrase                                 | COG4974 | L | GI 1 | 54  | 35  | 19   |
| RCA23_c00940 | 98894  | 98478  | putative HTH-type transcriptional repressor, ArsR family | COG0640 | K |      | 463 | 367 | 96   |
| RCA23_c00950 | 99032  | 99355  | ATP synthase protein I                                   |         |   |      | 599 | 344 | 255  |
| RCA23_c00960 | 99360  | 100142 | ATP synthase subunit AtpB                                | COG0356 | C |      | 361 | 248 | 113  |
| RCA23_c00970 | 100189 | 100425 | ATP synthase subunit c                                   |         |   |      | 766 | 349 | 417  |
| RCA23_c01000 | 102506 | 101736 | pyruvate dehydrogenase complex repressor                 | COG2186 | K |      | 376 | 382 | -6   |
| RCA23_c01010 | 103165 | 102623 | inner membrane lipoprotein YiaD                          | COG2885 | M |      | 265 | 319 | -54  |
| RCA23_c01020 | 103461 | 104105 | endonuclease III                                         | COG0177 | L |      | 351 | 403 | -52  |
| RCA23_c01030 | 104102 | 105094 | putative pfkB family carbohydrate kinase                 | COG0524 | G |      | 636 | 568 | 68   |
| RCA23_c01040 | 105925 | 105104 | hypothetical protein                                     |         |   |      | 439 | 403 | 36   |
| RCA23_c01050 | 106040 | 106831 | glycosyl transferase family 14                           |         |   |      | 610 | 421 | 189  |
| RCA23_c01060 | 106838 | 107617 | hypothetical protein                                     |         |   |      | 588 | 434 | 154  |
| RCA23_c01070 | 107628 | 108008 | HIT-like protein                                         | COG0537 | F |      | 461 | 501 | -40  |
| RCA23_c01080 | 108944 | 108024 | ABC transporter ATP binding protein                      | COG1131 | V |      | 655 | 495 | 160  |
| RCA23_c01090 | 109004 | 109222 | hypothetical protein                                     | COG4391 | S |      | 754 | 472 | 282  |
| RCA23_c01100 | 109664 | 109233 | hypothetical protein                                     |         |   |      | 564 | 410 | 154  |
| RCA23_c01110 | 109753 | 112548 | DNA polymerase I                                         | COG0749 | L |      | 456 | 441 | 15   |
| RCA23_c01120 | 112575 | 113720 | cystathionine gamma-synthase MetB                        | COG0626 | E |      | 208 | 301 | -93  |
| RCA23_c01130 | 113714 | 114265 | ribosomal large subunit pseudouridine synthase RluE      | COG1187 | J |      | 276 | 499 | -223 |
| RCA23_c01140 | 114879 | 114286 | hypothetical protein DUF1285                             | COG3816 | S |      | 371 | 533 | -162 |
| RCA23_c01150 | 114939 | 115946 | ATPase, MoxR type                                        | COG0714 | R |      | 192 | 243 | -51  |
| RCA23_c01160 | 115943 | 116806 | hypothetical protein                                     | COG1721 | R |      | 276 | 277 | -1   |
| RCA23_c01170 | 116803 | 119550 | hypothetical protein                                     |         |   |      | 224 | 357 | -133 |
| RCA23_c01180 | 119595 | 121607 | hypothetical protein DUF1355                             | COG5426 | S |      | 287 | 442 | -155 |

|              |        |        |                                                      |         |   |       |     |      |
|--------------|--------|--------|------------------------------------------------------|---------|---|-------|-----|------|
| RCA23_c01190 | 122292 | 123830 | glycolate oxidase subunit GlcD                       | COG0277 | C | 492   | 613 | -121 |
| RCA23_c01200 | 123827 | 124996 | glycolate oxidase subunit GlcE                       | COG0277 | C | 449   | 505 | -56  |
| RCA23_c01210 | 124996 | 126312 | glycolate oxidase iron-sulfur subunit GlcF           | COG0247 | C | 438   | 414 | 24   |
| RCA23_c01220 | 126476 | 127198 | hypothetical protein, trypsin                        | COG3591 | E | 379   | 640 | -261 |
| RCA23_c01230 | 128473 | 127643 | putative chitinase                                   | COG3325 | G | 43    | 18  | 25   |
| RCA23_c01240 | 129159 | 129614 | small heat shock protein lbpA                        | COG0071 | O | 1,541 | 759 | 782  |
| RCA23_c01250 | 131155 | 129680 | succinate-semialdehyde dehydrogenase GabD            | COG1012 | C | 335   | 398 | -63  |
| RCA23_c01260 | 131221 | 132024 | hypothetical protein                                 | COG0657 | I | 241   | 333 | -92  |
| RCA23_c01270 | 132344 | 132021 | hypothetical protein                                 | COG5617 | S | 233   | 327 | -94  |
| RCA23_c01280 | 133081 | 132341 | putative cyclopentanol dehydrogenase CpnA            | COG1028 | I | 381   | 387 | -6   |
| RCA23_c01290 | 133264 | 133566 | hypothetical protein                                 |         |   | 287   | 356 | -69  |
| RCA23_c01300 | 133661 | 134278 | hypothetical protein DUF1523                         |         |   | 469   | 370 | 99   |
| RCA23_c01310 | 136598 | 134286 | aldehyde dehydrogenase                               | COG1012 | C | 256   | 353 | -97  |
| RCA23_c01320 | 137589 | 136603 | deoxyribose-phosphate aldolase DeoC                  | COG0274 | F | 287   | 273 | 14   |
| RCA23_c01330 | 137692 | 138366 | ribulose-phosphate 3-epimerase, chromosomal          | COG0036 | G | 290   | 386 | -96  |
| RCA23_c01340 | 140190 | 138385 | hemolysin-type calcium-binding region                |         |   | 322   | 456 | -134 |
| RCA23_c01350 | 140316 | 143915 | 5-oxoprolinase (ATP-hydrolyzing)                     | COG0145 | E | 257   | 381 | -124 |
| RCA23_c01360 | 145374 | 144022 | aminotransferase class-III                           | COG0161 | H | 314   | 322 | -8   |
| RCA23_c01370 | 145865 | 145371 | ureidoglycolate hydrolase AllA                       | COG3194 | F | 551   | 501 | 50   |
| RCA23_c01380 | 146898 | 145891 | aldose 1-epimerase GalM                              | COG2017 | G | 273   | 397 | -124 |
| RCA23_c01390 | 148778 | 146898 | beta-galactosidase BgaB                              | COG1874 | G | 225   | 271 | -46  |
| RCA23_c01400 | 149622 | 148786 | putative gluconolactonase                            | COG3386 | G | 260   | 321 | -61  |
| RCA23_c01410 | 150218 | 149616 | 2-dehydro-3-deoxy-6-phosphogalactonate aldolase DgoA | COG0800 | G | 205   | 303 | -98  |
| RCA23_c01420 | 151120 | 150215 | 2-dehydro-3-deoxygalactonokinase DgoK                | COG3734 | G | 202   | 287 | -85  |
| RCA23_c01430 | 151884 | 151117 | short chain dehydrogenase                            | COG1028 | I | 245   | 234 | 11   |
| RCA23_c01440 | 154013 | 151929 | alpha-galactosidase RafA                             | COG3345 | G | 239   | 275 | -36  |
| RCA23_c01450 | 154942 | 154043 | putative ABC transporter inner membrane component    | COG0395 | G | 388   | 341 | 47   |
| RCA23_c01460 | 155930 | 154920 | putative ABC transporter inner membrane component    | COG1175 | G | 389   | 289 | 100  |
| RCA23_c01470 | 157438 | 156014 | putative extracellular solute-binding protein        | COG1653 | G | 365   | 261 | 104  |
| RCA23_c01480 | 157460 | 158245 | HTH-type transcriptional regulator, lclR family      | COG1414 | K | 141   | 131 | 10   |

|              |        |        |                                                              |         |   |     |     |      |
|--------------|--------|--------|--------------------------------------------------------------|---------|---|-----|-----|------|
| RCA23_c01490 | 158266 | 159324 | sugar ABC transporter ATP-binding protein                    | COG3839 | G | 231 | 267 | -36  |
| RCA23_c01500 | 160108 | 159344 | Sulfite exporter TauE/SafE                                   |         |   | 177 | 299 | -122 |
| RCA23_c01510 | 161562 | 160108 | putative transcriptional regulator, gntR family              | COG1167 | K | 244 | 244 | 0    |
| RCA23_c01520 | 163233 | 161716 | taurine--pyruvate aminotransferase Tpa                       | COG0161 | H | 341 | 283 | 58   |
| RCA23_c01530 | 163567 | 164568 | taurine ABC transporter, periplasmic binding protein TauA    | COG4521 | P | 501 | 386 | 115  |
| RCA23_c01540 | 164690 | 165496 | taurine ABC transport system ATP-binding protein TauB        | COG1116 | P | 614 | 476 | 138  |
| RCA23_c01550 | 165493 | 166803 | taurine ABC transport system permease protein TauC           | COG0600 | P | 618 | 484 | 134  |
| RCA23_c01560 | 169252 | 166847 | dimethylglycine dehydrogenase                                | COG0404 | E | 324 | 431 | -107 |
| RCA23_c01570 | 169351 | 170925 | trimethylamine methyltransferase MttB                        | COG5598 | H | 239 | 366 | -127 |
| RCA23_c01580 | 173231 | 170928 | 3-hydroxyacyl-CoA dehydrogenase FadN                         | COG1250 | I | 294 | 374 | -80  |
| RCA23_c01590 | 174034 | 173246 | hypothetical protein                                         | COG0596 | R | 346 | 339 | 7    |
| RCA23_c01600 | 175440 | 174031 | O-acetylhomoserine (thiol)-lyase CysD                        | COG2873 | E | 375 | 470 | -95  |
| RCA23_c01610 | 175521 | 177014 | putative signaling protein                                   | COG2200 | T | 515 | 534 | -19  |
| RCA23_c01620 | 177159 | 178928 | sulfoacetaldehyde acetyltransferase Xsc                      | COG0028 | E | 486 | 430 | 56   |
| RCA23_c01630 | 178940 | 179944 | phosphate acetyltransferase Pta                              | COG0280 | C | 250 | 314 | -64  |
| RCA23_c01640 | 179971 | 182781 | DMSO reductase chain A                                       | COG0243 | C | 273 | 340 | -67  |
| RCA23_c01650 | 182778 | 183659 | alpha/beta hydrolase                                         | COG0596 | R | 217 | 299 | -82  |
| RCA23_c01660 | 183656 | 184402 | DMSO reductase chain B                                       | COG0437 | C | 282 | 401 | -119 |
| RCA23_c01670 | 184402 | 185274 | DMSO reductase chain C                                       | COG3302 | R | 342 | 514 | -172 |
| RCA23_c01680 | 186741 | 185380 | sodium:alanine symporter                                     | COG1115 | E | 347 | 371 | -24  |
| RCA23_c01690 | 187519 | 186917 | thymidine kinase Tdk                                         | COG1435 | F | 259 | 365 | -106 |
| RCA23_c01700 | 187650 | 188366 | NADPH-dependent FMN reductase                                | COG0431 | R | 400 | 533 | -133 |
| RCA23_c01710 | 191838 | 188422 | carbamoyl-phosphate synthase large chain CarB                | COG0458 | E | 371 | 400 | -29  |
| RCA23_c01720 | 192331 | 191858 | HTH-type transcriptional regulator, AsnC family              | COG1522 | K | 562 | 484 | 78   |
| RCA23_c01730 | 192395 | 192673 | hypothetical protein                                         |         |   | 876 | 934 | -58  |
| RCA23_c01740 | 192769 | 194544 | aspartyl-tRNA synthase AspS                                  | COG0173 | J | 459 | 475 | -16  |
| RCA23_c01750 | 194967 | 194602 | hypothetical protein                                         |         |   | 335 | 405 | -70  |
| RCA23_c01760 | 195297 | 195013 | putative signal transduction response regulator receiver pro | COG2197 | T | 358 | 337 | 21   |
| RCA23_c01770 | 195361 | 195822 | methylmalonyl-CoA epimerase                                  | COG0346 | E | 605 | 483 | 122  |
| RCA23_c01780 | 195850 | 196143 | hypothetical protein DUF1467                                 | COG5454 | S | 593 | 437 | 156  |

|              |        |        |                                                      |         |   |     |     |      |
|--------------|--------|--------|------------------------------------------------------|---------|---|-----|-----|------|
| RCA23_c01790 | 196798 | 196100 | hypothetical protein DUF540                          | COG2981 | E | 452 | 400 | 52   |
| RCA23_c01800 | 197310 | 196795 | putative nitroreductase                              | COG0778 | C | 264 | 302 | -38  |
| RCA23_c01810 | 198509 | 197412 | histone deacetylase-like amidohydrolase HdaH         | COG0123 | B | 254 | 420 | -166 |
| RCA23_c01820 | 198760 | 198527 | hypothetical protein                                 |         |   | 331 | 417 | -86  |
| RCA23_c01830 | 198898 | 199593 | hypothetical protein, peptidase family M48           | COG0501 | O | 218 | 295 | -77  |
| RCA23_c01840 | 199628 | 199873 | hypothetical protein                                 |         |   | 216 | 359 | -143 |
| RCA23_c01850 | 201592 | 200219 | ribosomal protein S12 methylthiotransferase RimO     | COG0621 | J | 203 | 311 | -108 |
| RCA23_c01860 | 203057 | 201645 | hypothetical protein, transmembrane                  |         |   | 183 | 253 | -70  |
| RCA23_c01870 | 203697 | 203125 | GcrA cell cycle regulator                            | COG5352 | S | 261 | 323 | -62  |
| RCA23_c01880 | 203799 | 204602 | ABC-2 type transport system membrane protein         | COG0842 | V | 589 | 598 | -9   |
| RCA23_c01890 | 204812 | 205990 | acetylornithine aminotransferase ArgD                | COG4992 | E | 327 | 501 | -174 |
| RCA23_c01900 | 206062 | 206985 | ornithine carbamoyltransferase ArgF                  | COG0078 | E | 299 | 408 | -109 |
| RCA23_c01910 | 207091 | 207885 | hypothetical protein                                 |         |   | 277 | 502 | -225 |
| RCA23_c01920 | 207908 | 209323 | 6-phosphogluconate dehydrogenase GntZ                | COG0362 | G | 254 | 365 | -111 |
| RCA23_c01930 | 211949 | 209328 | ATP-dependent RNA helicase HrpB                      | COG1643 | L | 228 | 291 | -63  |
| RCA23_c01940 | 211993 | 212991 | LAO/AO transport system ATPase                       | COG1703 | E | 204 | 314 | -110 |
| RCA23_c01950 | 213208 | 213495 | 50S ribosomal protein L28                            | COG0227 | J | 729 | 469 | 260  |
| RCA23_c01960 | 213684 | 214121 | hypothetical protein                                 |         |   | 684 | 509 | 175  |
| RCA23_c01970 | 214253 | 216049 | GTP-binding protein LepA                             | COG0481 | M | 566 | 504 | 62   |
| RCA23_c01980 | 216818 | 216063 | hypothetical protein, alpha/beta hydrolase-like      | COG0596 | R | 269 | 374 | -105 |
| RCA23_c01990 | 216901 | 217473 | putative ring-cleaving dioxygenase                   | COG0346 | E | 435 | 594 | -159 |
| RCA23_c02000 | 218824 | 217544 | serine hydroxymethyltransferase GlyA                 | COG0112 | E | 425 | 364 | 61   |
| RCA23_c02010 | 218982 | 219755 | putative inorganic polyphosphate/ATP-NAD kinase PpnK | COG0061 | G | 432 | 438 | -6   |
| RCA23_c02020 | 222034 | 220145 | propionate--CoA ligase PrpE                          | COG0365 | I | 297 | 361 | -64  |
| RCA23_c02030 | 222198 | 223292 | hypothetical protein                                 | COG1917 | S | 290 | 425 | -135 |
| RCA23_c02040 | 223384 | 223809 | cytidine deaminase Cdd                               | COG0295 | F | 257 | 367 | -110 |
| RCA23_c02050 | 223809 | 225131 | thymidine phosphorylase DeoA                         | COG0213 | F | 209 | 351 | -142 |
| RCA23_c02060 | 225142 | 226296 | phosphopentomutase DeoB                              | COG1015 | G | 241 | 350 | -109 |
| RCA23_c02070 | 226293 | 227261 | adenosine deaminase Add                              | COG1816 | F | 392 | 461 | -69  |
| RCA23_c02080 | 227588 | 228214 | uracil phosphoribosyltransferase Upp                 | COG0035 | F | 717 | 465 | 252  |

|              |        |        |                                                              |         |   |     |     |      |
|--------------|--------|--------|--------------------------------------------------------------|---------|---|-----|-----|------|
| RCA23_c02090 | 228449 | 228868 | hypothetical protein                                         |         |   | 647 | 366 | 281  |
| RCA23_c02100 | 230234 | 228900 | 3-deoxy-D-manno-octulosonic-acid transferase WaaA            | COG1519 | M | 739 | 512 | 227  |
| RCA23_c02110 | 231721 | 230234 | L-sorbose 1-dehydrogenase                                    | COG2303 | E | 814 | 536 | 278  |
| RCA23_c02120 | 232388 | 231708 | putative N-acylneuraminate cytidyltransferase                | COG1083 | M | 721 | 442 | 279  |
| RCA23_c02130 | 233528 | 232392 | UDP-4-amino-4-deoxy-L-arabinose--oxoglutarate aminotran      | COG0399 | M | 732 | 488 | 244  |
| RCA23_c02140 | 236514 | 234343 | hypothetical protein                                         | COG3119 | P | 188 | 160 | 28   |
| RCA23_c02150 | 237421 | 236696 | hypothetical protein, nucleoside triphosphate hydrolases-lik | COG1122 | P | 241 | 189 | 52   |
| RCA23_c02160 | 238069 | 237422 | S-adenosyl-L-methionine-dependent methyltransferase          | COG2226 | H | 312 | 194 | 118  |
| RCA23_c02170 | 239306 | 238389 | hypothetical protein                                         |         |   | 275 | 268 | 7    |
| RCA23_c02180 | 241023 | 239398 | medium-chain-fatty-acid--CoA ligase AlkK                     | COG0318 | I | 311 | 345 | -34  |
| RCA23_c02190 | 241093 | 241995 | hypothetical protein DUF6 transmembrane                      | COG0697 | G | 423 | 493 | -70  |
| RCA23_c02200 | 244207 | 242024 | fatty acid oxidation complex alpha subunit FadJ              | COG1250 | I | 352 | 406 | -54  |
| RCA23_c02210 | 244632 | 244219 | hypothetical protein                                         |         |   | 532 | 651 | -119 |
| RCA23_c02220 | 245865 | 244654 | short chain dehydrogenase                                    | COG0183 | I | 230 | 341 | -111 |
| RCA23_c02230 | 246509 | 245877 | putative glutathione S-transferase                           | COG0625 | O | 519 | 394 | 125  |
| RCA23_c02240 | 248334 | 246553 | acyl-CoA dehydrogenase MmgC                                  | COG1960 | I | 389 | 367 | 22   |
| RCA23_c02250 | 248746 | 248357 | putative HTH-type transcriptional regulator, MerR family     | COG0789 | K | 557 | 407 | 150  |
| RCA23_c02260 | 249251 | 248883 | putative HTH-type transcriptional regulator, MerR family     | COG0789 | K | 553 | 505 | 48   |
| RCA23_c02270 | 250441 | 249299 | hypothetical protein, transmembrane protein DUF2899          |         |   | 442 | 566 | -124 |
| RCA23_c02280 | 250528 | 250956 | hypothetical protein, thioesterase                           | COG2050 | Q | 148 | 209 | -61  |
| RCA23_c02290 | 250953 | 251453 | hypothetical protein, thioesterase                           | COG2050 | Q | 252 | 263 | -11  |
| RCA23_c02300 | 251446 | 252768 | DNA-damage-inducible protein F                               | COG0534 | V | 309 | 520 | -211 |
| RCA23_c02310 | 253850 | 252789 | dihydroorotate dehydrogenase PyrD                            | COG0167 | F | 240 | 322 | -82  |
| RCA23_c02320 | 254185 | 253847 | hypothetical protein DUF952                                  | COG3502 | S | 527 | 496 | 31   |
| RCA23_c02330 | 254360 | 255892 | 5'-nucleotidase SurE                                         | COG0737 | F | 403 | 477 | -74  |
| RCA23_c02340 | 257694 | 255964 | hypothetical protein                                         | COG3409 | M | 265 | 336 | -71  |
| RCA23_c02350 | 257885 | 258799 | glycyl-tRNA synthase alpha subunit GlyQ                      | COG0752 | J | 609 | 605 | 4    |
| RCA23_c02360 | 258799 | 259317 | hypothetical protein                                         |         |   | 393 | 433 | -40  |
| RCA23_c02370 | 259317 | 261374 | glycyl-tRNA synthase beta subunit GlyS                       | COG0751 | J | 339 | 366 | -27  |
| RCA23_c02380 | 261437 | 263977 | pyruvate, phosphate dikinase PpdK                            | COG0574 | G | 240 | 338 | -98  |



|              |        |        |                                                          |         |   |     |     |      |
|--------------|--------|--------|----------------------------------------------------------|---------|---|-----|-----|------|
| RCA23_c02390 | 264078 | 264761 | putative cell wall hydrolase                             | COG3773 | M | 429 | 521 | -92  |
| RCA23_c02400 | 264811 | 265737 | hypothetical protein, dihydroneopterin aldolase          | COG1539 | H | 326 | 427 | -101 |
| RCA23_c02410 | 265734 | 266720 | dihydropteroate synthase FolP                            | COG0294 | H | 218 | 368 | -150 |
| RCA23_c02420 | 267675 | 266692 | putative integral membrane protein DUF6                  | COG0697 | G | 277 | 365 | -88  |
| RCA23_c02430 | 268729 | 267707 | ketol-acid reductoisomerase llvC                         | COG0059 | E | 455 | 347 | 108  |
| RCA23_c02440 | 268864 | 269319 | putative transcriptional regulator, asnC family          | COG1522 | K | 260 | 420 | -160 |
| RCA23_c02450 | 269316 | 269771 | putative transcriptional regulator, asnC family          | COG1522 | K | 255 | 394 | -139 |
| RCA23_c02460 | 269846 | 270979 | hypothetical protein                                     | COG0075 | E | 378 | 383 | -5   |
| RCA23_c02470 | 272183 | 270987 | 2-octaprenyl-6-methoxyphenol hydroxylase UbiH            | COG0654 | H | 210 | 332 | -122 |
| RCA23_c02480 | 272931 | 272161 | putative pyrimidine 5-nucleotidase                       | COG1011 | R | 348 | 434 | -86  |
| RCA23_c02490 | 273012 | 273620 | putative HTH-type transcriptional regulator, GntR family | COG1802 | K | 242 | 345 | -103 |
| RCA23_c02500 | 275505 | 273580 | uncharacterized glycosyltransferase YdaM                 | COG1215 | M | 317 | 431 | -114 |
| RCA23_c02510 | 276701 | 275577 | carbamoyl-phosphate synthase small chain CarA            | COG0505 | E | 362 | 363 | -1   |
| RCA23_c02520 | 276880 | 277338 | GatB/YqeY family protein                                 | COG1610 | S | 554 | 518 | 36   |
| RCA23_c02530 | 277906 | 277379 | hypothetical protein                                     | COG5488 | S | 343 | 384 | -41  |
| RCA23_c02540 | 279835 | 278162 | cytochrome c oxidase subunit 1                           | COG0843 | C | 599 | 404 | 195  |
| RCA23_c02550 | 280700 | 280038 | octanoyltransferase LipB                                 | COG0321 | H | 284 | 374 | -90  |
| RCA23_c02560 | 281476 | 280700 | hypothetical protein, LytTr transcriptional regulator    | COG3279 | K | 157 | 207 | -50  |
| RCA23_c02570 | 281566 | 282084 | membrane protein-like                                    | COG5395 | S | 319 | 344 | -25  |
| RCA23_c02590 | 284544 | 282886 | arylsulfatase                                            | COG3119 | P | 331 | 339 | -8   |
| RCA23_c02600 | 284793 | 285923 | NADPH dehydrogenas                                       | COG1902 | C | 211 | 275 | -64  |
| RCA23_c02610 | 287001 | 285961 | L-idonate 5-dehydrogenase ldnD                           | COG1063 | E | 214 | 271 | -57  |
| RCA23_c02620 | 287045 | 287839 | gluconate 5-dehydrogenase Gno                            | COG1028 | I | 244 | 357 | -113 |
| RCA23_c02630 | 288037 | 288939 | uncharacterized oxidoreductase YgbJ                      | COG2084 | I | 282 | 358 | -76  |
| RCA23_c02640 | 288936 | 289799 | hypothetical protein, xylose isomerase-like              | COG1082 | G | 259 | 421 | -162 |
| RCA23_c02650 | 290765 | 289839 | glyoxylate reductase GyaR                                | COG1052 | C | 275 | 373 | -98  |
| RCA23_c02660 | 290938 | 290762 | hypothetical protein                                     |         |   | 401 | 386 | 15   |
| RCA23_c02670 | 290989 | 291273 | hypothetical protein, AzlC-like                          | COG1296 | E | 119 | 114 | 5    |
| RCA23_c02680 | 293832 | 291886 | cbbT/tktB: transketolase                                 | COG0021 | G | 35  | 55  | -20  |
| RCA23_c02690 | 295174 | 293834 | hypothetical protein                                     | COG4091 | E | 45  | 80  | -35  |

|              |        |        |                                                              |         |   |     |     |      |
|--------------|--------|--------|--------------------------------------------------------------|---------|---|-----|-----|------|
| RCA23_c02700 | 295374 | 296207 | transketolase, alpha subunit                                 | COG3959 | G | 64  | 84  | -20  |
| RCA23_c02710 | 296204 | 297247 | transketolase, beta-subunit                                  | COG3958 | G | 33  | 56  | -23  |
| RCA23_c02720 | 297249 | 297809 | putative 3-hydroxyisobutyrate dehydrogenase                  | COG2084 | I | 23  | 47  | -24  |
| RCA23_c02730 | 297809 | 298171 | putative 3-hydroxyisobutyrate dehydrogenase                  | COG2084 | I | 41  | 116 | -75  |
| RCA23_c02740 | 298168 | 298920 | 3-oxoacyl-[acyl-carrier-protein] reductase FabG              | COG1028 | I | 63  | 100 | -37  |
| RCA23_c02750 | 299907 | 298930 | HTH-type transcriptional regulator, LysR family              | COG0583 | K | 53  | 71  | -18  |
| RCA23_c02760 | 300726 | 300040 | putative HTH-type transcriptional regulator, GntR family     | COG1802 | K | 134 | 109 | 25   |
| RCA23_c02770 | 300938 | 301951 | TRAP dicarboxylate transporter, subunit DctP                 | COG4663 | Q | 153 | 99  | 54   |
| RCA23_c02780 | 302000 | 302872 | TRAP dicarboxylate transporter, subunit DctQ                 | COG4665 | Q | 180 | 134 | 46   |
| RCA23_c02800 | 304513 | 305322 | hypothetical protein                                         | COG0240 | C | 83  | 98  | -15  |
| RCA23_c02810 | 305336 | 306664 | hypothetical protein DUF1537                                 | COG3395 | S | 99  | 119 | -20  |
| RCA23_c02820 | 306661 | 307920 | putative ribulose biphosphate carboxylase large chain        | COG1850 | G | 55  | 88  | -33  |
| RCA23_c02830 | 308882 | 307917 | hypothetical protein, NAD dependent epimerase / dehydratase  | COG0451 | M | 98  | 93  | 5    |
| RCA23_c02840 | 309016 | 309939 | 2-hydroxy-3-oxopropionate reductase GarR                     | COG2084 | I | 65  | 89  | -24  |
| RCA23_c02850 | 310592 | 310035 | hypothetical protein                                         |         |   | 69  | 68  | 1    |
| RCA23_c02860 | 310977 | 312479 | altronate hydrolase UxaA                                     | COG2721 | G | 287 | 313 | -26  |
| RCA23_c02870 | 312455 | 313480 | putative oxidoreductase                                      | COG0673 | R | 374 | 392 | -18  |
| RCA23_c02880 | 313516 | 314403 | 2-hydroxy-3-oxopropionate reductase GarR                     | COG2084 | I | 370 | 358 | 12   |
| RCA23_c02890 | 314406 | 315287 | S-adenosylmethionine uptake transporter Sam                  | COG0697 | G | 714 | 584 | 130  |
| RCA23_c02900 | 315284 | 316147 | 2-dehydro-3-deoxygluconokinase KdgK                          | COG0524 | G | 444 | 419 | 25   |
| RCA23_c02910 | 317333 | 316134 | D-mannonate oxidoreductase UxuB                              | COG0246 | G | 274 | 353 | -79  |
| RCA23_c02920 | 318704 | 317334 | uronate isomerase UxaC                                       | COG1904 | G | 271 | 302 | -31  |
| RCA23_c02930 | 318798 | 319817 | putative oxidoreductase                                      | COG0673 | R | 175 | 238 | -63  |
| RCA23_c02940 | 319829 | 320809 | putative oxidoreductase                                      | COG0673 | R | 304 | 345 | -41  |
| RCA23_c02950 | 320806 | 321861 | putative oxidoreductase                                      | COG0673 | R | 242 | 272 | -30  |
| RCA23_c02960 | 321849 | 323057 | mannonate dehydratase UxuA                                   | COG1312 | G | 216 | 284 | -68  |
| RCA23_c02970 | 323103 | 324641 | long-chain-fatty-acid--CoA ligase                            | COG0318 | I | 230 | 340 | -110 |
| RCA23_c02980 | 324634 | 325440 | D-beta-hydroxybutyrate dehydrogenase BdhA                    | COG1028 | I | 247 | 448 | -201 |
| RCA23_c02990 | 325531 | 327783 | copper-transporting P-type ATPase ActP                       | COG2217 | P | 292 | 457 | -165 |
| RCA23_c03000 | 327811 | 328200 | HTH-type transcriptional regulator (copper efflux regulator) | COG0789 | K | 384 | 514 | -130 |

|              |        |        |                                                            |         |   |     |     |      |
|--------------|--------|--------|------------------------------------------------------------|---------|---|-----|-----|------|
| RCA23_c03010 | 328492 | 328253 | hypothetical protein                                       | COG3937 | S | 328 | 304 | 24   |
| RCA23_c03020 | 328847 | 329161 | hypothetical protein                                       |         |   | 479 | 454 | 25   |
| RCA23_c03030 | 331571 | 329382 | isocitrate dehydrogenase lcd                               | COG2838 | C | 360 | 383 | -23  |
| RCA23_c03040 | 332596 | 331688 | integral membrane protein DUF6                             | COG0697 | G | 370 | 367 | 3    |
| RCA23_c03050 | 332863 | 333540 | flavocytochrome c cytochrome subunit SoxE                  | COG3474 | C | 492 | 664 | -172 |
| RCA23_c03060 | 333621 | 334832 | sulfide dehydrogenase [flavocytochrome c] flavoprotein cha | COG0446 | R | 319 | 404 | -85  |
| RCA23_c03070 | 335365 | 334916 | hypothetical protein, OsmC-like                            | COG1764 | O | 444 | 380 | 64   |
| RCA23_c03080 | 336582 | 335440 | putative dimethyl sulfoniopropionate demethylase DmdA      | COG0404 | E | 508 | 485 | 23   |
| RCA23_c03090 | 337231 | 336746 | transcriptional regulator, AsnC family                     | COG1522 | K | 732 | 486 | 246  |
| RCA23_c03100 | 338152 | 338784 | glutathione S-transferase                                  | COG0625 | O | 93  | 79  | 14   |
| RCA23_c03120 | 340630 | 339608 | hypothetical protein, ribonuclease, E/G family             | COG1530 | J | 306 | 281 | 25   |
| RCA23_c03130 | 341160 | 340627 | Maf-like protein                                           | COG0424 | D | 156 | 192 | -36  |
| RCA23_c03140 | 341419 | 341201 | translation initiation factor IF-1                         | COG0361 | J | 574 | 601 | -27  |
| RCA23_c03150 | 342020 | 341622 | hypothetical protein, low molecular weight phosphotyrosine | COG0394 | T | 491 | 374 | 117  |
| RCA23_c03160 | 342565 | 342086 | hypothetical protein UPF0262                               | COG5328 | S | 455 | 421 | 34   |
| RCA23_c03170 | 343866 | 342565 | histidinol dehydrogenase HisD                              | COG0141 | E | 235 | 274 | -39  |
| RCA23_c03180 | 344390 | 343932 | hypothetical protein                                       |         |   | 233 | 414 | -181 |
| RCA23_c03190 | 345655 | 344387 | UDP-N-acetylglucosamine 1-carboxyvinyltransferase MurA     | COG0766 | M | 277 | 290 | -13  |
| RCA23_c03210 | 346329 | 347666 | PAS/PAC sensor hybrid histidine kinase                     | COG0642 | T | 293 | 203 | 90   |
| RCA23_c03220 | 347759 | 348817 | 2OG-Fe(II) oxygenase                                       | COG3491 | R | 359 | 267 | 92   |
| RCA23_c03230 | 348821 | 349465 | putative lysine exporter protein                           | COG1280 | E | 425 | 357 | 68   |
| RCA23_c03240 | 349742 | 350194 | putative carbon monoxide dehydrogenase subunit G           | COG3427 | S | 365 | 468 | -103 |
| RCA23_c03250 | 350184 | 351113 | hypothetical protein, XdhC and CoxI family                 | COG1975 | O | 275 | 339 | -64  |
| RCA23_c03260 | 352364 | 351108 | putative MFS-type transporter                              | COG2814 | G | 383 | 409 | -26  |
| RCA23_c03270 | 352457 | 353512 | AFG1-like ATPase                                           | COG1485 | R | 237 | 332 | -95  |
| RCA23_c03280 | 354792 | 353509 | bifunctional protein FolC                                  | COG0285 | H | 200 | 338 | -138 |
| RCA23_c03290 | 355709 | 354789 | acetyl-coenzyme A carboxylase carboxyl transferase beta s  | COG0777 | I | 408 | 418 | -10  |
| RCA23_c03300 | 356729 | 355773 | hypothetical protein, CAAX amino terminal protease-like    | COG1266 | R | 413 | 454 | -41  |
| RCA23_c03310 | 356791 | 358524 | dihydroxy-acid dehydratase llvD                            | COG0129 | E | 332 | 368 | -36  |
| RCA23_c03320 | 358660 | 359103 | hypothetical protein                                       |         |   | 227 | 276 | -49  |

|              |        |        |                                                            |         |   |     |     |      |
|--------------|--------|--------|------------------------------------------------------------|---------|---|-----|-----|------|
| RCA23_c03330 | 359279 | 360058 | hypothetical protein                                       |         |   | 249 | 344 | -95  |
| RCA23_c03340 | 360076 | 360423 | hypothetical protein                                       |         |   | 380 | 445 | -65  |
| RCA23_c03350 | 361268 | 360426 | hypothetical protein, OmpA family                          | COG2885 | M | 332 | 403 | -71  |
| RCA23_c03360 | 361905 | 361339 | hypothetical protein, peroxidase-like protein              | COG2128 | S | 428 | 461 | -33  |
| RCA23_c03370 | 362627 | 361902 | hypothetical protein, acetyltransferase-like               | COG0456 | R | 256 | 347 | -91  |
| RCA23_c03380 | 363346 | 362624 | hypothetical protein, probably molybdopterin binding       | COG1058 | R | 218 | 322 | -104 |
| RCA23_c03390 | 363392 | 364114 | sugar fermentation stimulation protein SfsA                | COG1489 | R | 302 | 425 | -123 |
| RCA23_c03400 | 364191 | 365000 | methionine aminopeptidase Map                              | COG0024 | J | 369 | 393 | -24  |
| RCA23_c03410 | 366577 | 365054 | ATP-dependent RNA helicase RhIE                            | COG0513 | L | 275 | 300 | -25  |
| RCA23_c03420 | 367398 | 366829 | putative ribosomal RNA small subunit methyltransferase D   | COG0742 | L | 236 | 306 | -70  |
| RCA23_c03430 | 368600 | 367395 | rhodocoxin reductase ThcD                                  | COG0446 | R | 286 | 329 | -43  |
| RCA23_c03440 | 368681 | 369172 | peroxiredoxin                                              | COG0678 | O | 574 | 527 | 47   |
| RCA23_c03450 | 369613 | 369326 | pterin-4-alpha-carbinolamine dehydratase                   | COG2154 | H | 559 | 495 | 64   |
| RCA23_c03460 | 370797 | 369610 | hypothetical protein DUF482                                | COG3146 | S | 291 | 351 | -60  |
| RCA23_c03470 | 371604 | 370849 | putative glycerophosphoryl diester phosphodiesterase       | COG0584 | C | 398 | 441 | -43  |
| RCA23_c03480 | 372065 | 371601 | putative endoribonuclease L-PSP                            | COG0251 | J | 345 | 507 | -162 |
| RCA23_c03490 | 373364 | 372132 | type I secretion system protein, HlyD family               | COG1566 | V | 257 | 378 | -121 |
| RCA23_c03500 | 374871 | 373411 | type I secretion system ATP-binding component              | COG4618 | R | 195 | 310 | -115 |
| RCA23_c03510 | 375137 | 374874 | putative type I secretion system protein, transmembrane do | COG4618 | R | 484 | 480 | 4    |
| RCA23_c03520 | 375269 | 376000 | VacJ like lipoprotein                                      | COG2853 | M | 564 | 440 | 124  |
| RCA23_c03530 | 375984 | 376589 | putative toluene tolerance protein                         | COG2854 | Q | 423 | 353 | 70   |
| RCA23_c03540 | 378789 | 376654 | penicillin-binding protein 1B                              | COG0744 | M | 283 | 374 | -91  |
| RCA23_c03550 | 380155 | 378971 | aromatic-amino-acid aminotransferase TyrB                  | COG1448 | E | 343 | 390 | -47  |
| RCA23_c03560 | 381012 | 380155 | 3-mercaptopyruvate sulfurtransferase SseA                  | COG2897 | P | 307 | 316 | -9   |
| RCA23_c03570 | 381576 | 381100 | SsrA-binding protein SmpB                                  | COG0691 | O | 752 | 622 | 130  |
| RCA23_c03580 | 382567 | 381680 | dihydrodipicolinate synthase DapA                          | COG0329 | E | 245 | 271 | -26  |
| RCA23_c03590 | 382609 | 384669 | soluble lytic murein transglycosylase Slt                  | COG0741 | M | 231 | 304 | -73  |
| RCA23_c03600 | 385589 | 384717 | hypothetical protein DUF6 transmembrane                    | COG0697 | G | 244 | 358 | -114 |
| RCA23_c03610 | 386248 | 385586 | hypothetical protein DUF752                                | COG4121 | S | 268 | 375 | -107 |
| RCA23_c03620 | 386288 | 387352 | putative FAD-dependent oxidoreductase                      | COG0665 | E | 279 | 439 | -160 |

|              |        |        |                                                             |         |   |     |     |      |
|--------------|--------|--------|-------------------------------------------------------------|---------|---|-----|-----|------|
| RCA23_c03630 | 387390 | 387752 | hypothetical protein, glyoxalase/dioxygenase superfamily    | COG0346 | E | 217 | 367 | -150 |
| RCA23_c03640 | 388138 | 387773 | hypothetical protein                                        |         |   | 350 | 445 | -95  |
| RCA23_c03650 | 388488 | 388135 | hypothetical protein                                        |         |   | 529 | 416 | 113  |
| RCA23_c03660 | 389111 | 388503 | cob(I)yrinic acid a,c-diamide adenosyltransferase CobO      | COG2109 | H | 496 | 404 | 92   |
| RCA23_c03670 | 389202 | 389606 | hypothetical protein                                        |         |   | 210 | 318 | -108 |
| RCA23_c03680 | 390600 | 389629 | oligopeptide/dipeptide ABC transporter, ATP-binding proteir | COG0444 | E | 260 | 314 | -54  |
| RCA23_c03690 | 391589 | 390600 | oligopeptide/dipeptide ABC transporter, ATP-binding proteir | COG0444 | E | 238 | 350 | -112 |
| RCA23_c03700 | 392467 | 391586 | oligopeptide/dipeptide ABC transporter, permease protein    | COG1173 | E | 262 | 357 | -95  |
| RCA23_c03710 | 393441 | 392464 | oligopeptide/dipeptide ABC transporter, permease protein    | COG0601 | E | 439 | 395 | 44   |
| RCA23_c03720 | 395073 | 393502 | oligopeptide/dipeptide ABC transporter, periplasmic substra | COG0747 | E | 379 | 323 | 56   |
| RCA23_c03730 | 396231 | 395302 | HTH-type transcriptional regulator, LysR family             | COG0583 | K | 497 | 494 | 3    |
| RCA23_c03740 | 396411 | 397982 | putative amidohydrolase 3                                   | COG1574 | R | 232 | 346 | -114 |
| RCA23_c03750 | 397979 | 398881 | cobalamin biosynthesis CobW-like                            | COG0523 | R | 249 | 331 | -82  |
| RCA23_c03760 | 398992 | 400035 | hypothetical protein, restriction endonuclease type IV-like | COG4127 | S | 241 | 213 | 28   |
| RCA23_c03770 | 401165 | 400095 | glycine betaine transport ATP-binding protein OpuAA         | COG4175 | E | 439 | 469 | -30  |
| RCA23_c03780 | 402193 | 401162 | glycine betaine transport system permease protein OpuAB     | COG4176 | E | 459 | 546 | -87  |
| RCA23_c03790 | 403226 | 402258 | glycine betaine transporter substrate-binding protein OpuAC | COG2113 | E | 364 | 379 | -15  |
| RCA23_c03800 | 403626 | 404708 | fatty acid desaturase                                       | COG3239 | I | 370 | 432 | -62  |
| RCA23_c03810 | 405832 | 404717 | CoA-transferase family III protein involved in DMSP degrad. | COG1804 | C | 286 | 378 | -92  |
| RCA23_c03820 | 405843 | 406949 | glyceraldehyde-3-phosphate dehydrogenase Gap                | COG0057 | G | 320 | 495 | -175 |
| RCA23_c03830 | 407067 | 407687 | ATP-dependent Clp protease proteolytic subunit ClpP         | COG0740 | O | 732 | 497 | 235  |
| RCA23_c03840 | 407812 | 409077 | ATP-dependent Clp protease ATP-binding subunit ClpX         | COG1219 | O | 680 | 551 | 129  |
| RCA23_c03850 | 409209 | 409592 | putative NADH ubiquinone oxidoreductase subunit NDUFAB1     | COG3761 | C | 786 | 483 | 303  |
| RCA23_c03860 | 409597 | 410043 | ABC-type transport system involved in resistance to organic | COG1463 | Q | 548 | 559 | -11  |
| RCA23_c03870 | 410043 | 410402 | Uncharacterized protein conserved in bacteria (DUF2155)     | COG4765 | S | 308 | 397 | -89  |
| RCA23_c03880 | 411007 | 410366 | leucyl/phenylalanyl-tRNA--protein transferase Aat           | COG2360 | O | 466 | 513 | -47  |
| RCA23_c03890 | 412356 | 411004 | biotin carboxylase AccC                                     | COG4770 | I | 318 | 325 | -7   |
| RCA23_c03900 | 414969 | 413026 | acetyl-coenzyme A synthase AcsA                             | COG0365 | I | 265 | 296 | -31  |
| RCA23_c03910 | 415768 | 415037 | high-affinity branched-chain amino acid transport ATP-bindi | COG0410 | E | 232 | 342 | -110 |
| RCA23_c03920 | 416529 | 415771 | high-affinity branched-chain amino acid transport ATP-bindi | COG0411 | E | 513 | 381 | 132  |

|              |        |        |                                                                  |         |   |      |     |     |      |
|--------------|--------|--------|------------------------------------------------------------------|---------|---|------|-----|-----|------|
| RCA23_c03930 | 417743 | 416541 | putative branched-chain amino acid transport system permease     | COG4177 | E |      | 708 | 525 | 183  |
| RCA23_c03940 | 418779 | 417748 | putative branched-chain amino acid transport system permease     | COG0559 | E |      | 636 | 469 | 167  |
| RCA23_c03950 | 420231 | 418885 | hypothetical protein                                             | COG0683 | E |      | 472 | 393 | 79   |
| RCA23_c03960 | 420457 | 421773 | hypothetical protein, DNA binding helix-turn helix proteins      | COG1396 | K |      | 304 | 375 | -71  |
| RCA23_c03970 | 421836 | 422207 | putative response regulator receiver protein, CheY like          | COG0745 | T |      | 506 | 409 | 97   |
| RCA23_c03980 | 422204 | 422473 | hypothetical protein                                             |         |   |      | 308 | 532 | -224 |
| RCA23_c03990 | 422474 | 425128 | sensor protein kinase Walk                                       | COG0591 | E |      | 309 | 414 | -105 |
| RCA23_c04000 | 425546 | 425109 | hypothetical protein DUF442                                      | COG3453 | S |      | 331 | 346 | -15  |
| RCA23_c04010 | 425805 | 425593 | hypothetical protein                                             |         |   |      | 528 | 443 | 85   |
| RCA23_c04020 | 425917 | 426168 | hypothetical protein                                             | COG3750 | S |      | 925 | 593 | 332  |
| RCA23_c04030 | 427065 | 426184 | hypothetical protein                                             |         |   |      | 688 | 461 | 227  |
| RCA23_c04040 | 427159 | 428790 | putative Fe(3+)-transport system protein SfuB                    | COG1178 | P |      | 329 | 410 | -81  |
| RCA23_c04060 | 428970 | 430124 | integrase                                                        | COG0582 | L | GI 2 | 37  | 28  | 9    |
| RCA23_c04070 | 430197 | 430778 | hypothetical protein                                             | COG3945 | S | GI 2 | 17  | 8   | 9    |
| RCA23_c04080 | 434845 | 431570 | hypothetical protein                                             |         |   | GI 2 | 41  | 29  | 12   |
| RCA23_c04090 | 434910 | 437174 | UDP-N-acetylglucosamine--peptide N-acetylglucosaminyltransferase | COG0457 | R | GI 2 | 20  | 13  | 7    |
| RCA23_c04100 | 440084 | 439434 | esterase, SGNH hydrolase-type                                    | COG2755 | E | GI 2 | 0   | 0   | 0    |
| RCA23_c04110 | 440656 | 440258 | hypothetical protein                                             |         |   | GI 2 | 235 | 150 | 85   |
| RCA23_c04120 | 441029 | 441403 | hypothetical protein, tetratricopeptide repeat                   | COG0790 | R | GI 2 | 76  | 63  | 13   |
| RCA23_c04130 | 441971 | 441678 | hypothetical protein                                             |         |   | GI 2 | 270 | 161 | 109  |
| RCA23_c04140 | 442447 | 442121 | hypothetical protein                                             |         |   | GI 2 | 223 | 168 | 55   |
| RCA23_c04150 | 442788 | 442444 | hypothetical protein                                             |         |   | GI 2 | 224 | 151 | 73   |
| RCA23_c04160 | 443599 | 443222 | hypothetical protein, RmlC-like cupin family                     | COG3450 | R | GI 2 | 4   | 15  | -11  |
| RCA23_c04170 | 444724 | 444101 | hypothetical protein                                             |         |   | GI 2 | 45  | 28  | 17   |
| RCA23_c04180 | 445304 | 444918 | hypothetical protein, DUF3127                                    |         |   | GI 2 | 56  | 66  | -10  |
| RCA23_c04190 | 446438 | 445509 | putative nucleoside triphosphate hydrolase, ATPase domain        | COG1066 | O | GI 2 | 14  | 20  | -6   |
| RCA23_c04200 | 447532 | 449187 | zinc-dependent metalloprotease                                   | COG2931 | Q | GI 2 | 119 | 65  | 54   |
| RCA23_c04210 | 449574 | 449230 | HTH-type transcriptional regulator, AsnC family                  | COG1522 | K | GI 2 | 160 | 127 | 33   |
| RCA23_c04220 | 450860 | 449781 | integrase                                                        | COG2801 | L | GI 2 | 0   | 0   | 0    |
| RCA23_c04230 | 453456 | 452530 | putative ion channel                                             |         |   | GI 2 | 549 | 372 | 177  |

|              |        |        |                                                             |         |   |      |     |     |      |
|--------------|--------|--------|-------------------------------------------------------------|---------|---|------|-----|-----|------|
| RCA23_c04240 | 454720 | 453746 | integrase                                                   | COG4974 | L | GI 2 | 326 | 288 | 38   |
| RCA23_c04250 | 455125 | 455838 | Gcn5-like N-acetyltransferase                               | COG1670 | J | GI 2 | 8   | 1   | 7    |
| RCA23_c04260 | 457797 | 456643 | integrase                                                   | COG0582 | L | GI 2 | 166 | 139 | 27   |
| RCA23_c04280 | 458139 | 459119 | hypothetical protein, NAD dependent epimerase / dehydratase | COG0702 | M |      | 246 | 375 | -129 |
| RCA23_c04290 | 459936 | 459124 | undecaprenyl-diphosphatase UppP                             | COG1968 | V |      | 192 | 274 | -82  |
| RCA23_c04300 | 460124 | 461578 | glutamate synthase [NADPH] small chain GltD                 | COG0493 | E |      | 382 | 340 | 42   |
| RCA23_c04310 | 461639 | 466186 | glutamate synthase [NADPH] large chain GltB                 | COG0069 | E |      | 343 | 411 | -68  |
| RCA23_c04320 | 466290 | 467033 | monofunctional biosynthetic peptidoglycan transglycosylase  | COG0744 | M |      | 271 | 373 | -102 |
| RCA23_c04330 | 467132 | 467752 | putative glutathione S-transferase                          | COG0625 | O |      | 483 | 589 | -106 |
| RCA23_c04340 | 467733 | 468776 | putative electron transport protein yjeS                    | COG1600 | C |      | 231 | 349 | -118 |
| RCA23_c04360 | 469585 | 468773 | hypothetical protein                                        | COG5266 | P |      | 307 | 349 | -42  |
| RCA23_c04350 | 469584 | 470741 | hypothetical protein                                        |         |   |      | 351 | 560 | -209 |
| RCA23_c04370 | 471709 | 470840 | branched-chain-amino-acid aminotransferase IlvE             | COG0115 | E |      | 279 | 331 | -52  |
| RCA23_c04380 | 471872 | 472384 | HTH-type transcriptional regulator PetP                     | COG1846 | K |      | 317 | 270 | 47   |
| RCA23_c04390 | 472381 | 473094 | protein PetR                                                | COG0745 | T |      | 277 | 371 | -94  |
| RCA23_c04400 | 473091 | 474020 | putative deacylase, histone deacetylase superfamily protein | COG0123 | B |      | 332 | 484 | -152 |
| RCA23_c04410 | 474013 | 474255 | exodeoxyribonuclease 7 small subunit XseB                   | COG1722 | L |      | 304 | 484 | -180 |
| RCA23_c04420 | 474215 | 475159 | geranyltranstransferase IspA                                | COG0142 | H |      | 225 | 362 | -137 |
| RCA23_c04430 | 475200 | 477101 | 1-deoxy-D-xylulose-5-phosphate synthase Dxs                 | COG1154 | H |      | 238 | 320 | -82  |
| RCA23_c04440 | 478007 | 477105 | hypothetical protein, NAD dependent epimerase/dehydratase   | COG0451 | M |      | 220 | 302 | -82  |
| RCA23_c04450 | 478232 | 478657 | hypothetical protein                                        |         |   |      | 298 | 338 | -40  |
| RCA23_c04460 | 478753 | 479079 | hypothetical protein                                        |         |   |      | 446 | 435 | 11   |
| RCA23_c04470 | 479921 | 479142 | carnitiny-CoA dehydratase CaiD                              | COG1024 | I |      | 337 | 370 | -33  |
| RCA23_c04480 | 481945 | 479918 | hypothetical protein, CoA-binding                           | COG1042 | C |      | 232 | 293 | -61  |
| RCA23_c04490 | 483157 | 481997 | putative acyl-CoA dehydrogenase YngJ                        | COG1960 | I |      | 288 | 270 | 18   |
| RCA23_c04500 | 483234 | 484166 | transcriptional regulator, AraC family                      | COG4977 | K |      | 204 | 299 | -95  |
| RCA23_c04510 | 484951 | 484196 | class II aldolase                                           | COG0235 | G |      | 278 | 347 | -69  |
| RCA23_c04520 | 485442 | 485014 | arsenate reductase ArsC                                     | COG1393 | P |      | 218 | 288 | -70  |
| RCA23_c04530 | 485529 | 487343 | adenine deaminase Ade                                       | COG1001 | F |      | 223 | 310 | -87  |
| RCA23_c04540 | 487330 | 488805 | AMP nucleosidase Amn                                        | COG0775 | F |      | 382 | 319 | 63   |

|              |        |        |                                                              |         |   |     |     |      |
|--------------|--------|--------|--------------------------------------------------------------|---------|---|-----|-----|------|
| RCA23_c04550 | 488882 | 489214 | DNA-binding protein HU                                       | COG0776 | L | 749 | 586 | 163  |
| RCA23_c04560 | 489360 | 490229 | inner membrane protein DUF6                                  | COG0697 | G | 402 | 597 | -195 |
| RCA23_c04570 | 490303 | 491016 | hypothetical protein, cytochrome C biogenesis protein        | COG0785 | O | 316 | 423 | -107 |
| RCA23_c04580 | 491039 | 491449 | hypothetical protein, thioredoxin                            | COG0526 | O | 398 | 399 | -1   |
| RCA23_c04590 | 492021 | 491446 | hypothetical protein                                         | COG3222 | S | 181 | 253 | -72  |
| RCA23_c04600 | 493168 | 492038 | succinyl-diaminopimelate desuccinylase DapE                  | COG0624 | E | 242 | 273 | -31  |
| RCA23_c04610 | 493554 | 493168 | hypothetical protein                                         |         |   | 369 | 407 | -38  |
| RCA23_c04620 | 494478 | 493591 | 2,3,4,5-tetrahydropyridine-2,6-dicarboxylate N-succinyltrans | COG2171 | E | 248 | 351 | -103 |
| RCA23_c04630 | 495411 | 494482 | L-threonine ammonia-lyase                                    | COG1171 | E | 204 | 305 | -101 |
| RCA23_c04640 | 496617 | 495427 | ribosomal RNA large subunit methyltransferase N              | COG0820 | R | 322 | 367 | -45  |
| RCA23_c04650 | 497212 | 496688 | hypothetical protein                                         |         |   | 320 | 378 | -58  |
| RCA23_c04660 | 497318 | 498349 | L-asparaginase II                                            | COG4448 | E | 194 | 300 | -106 |
| RCA23_c04670 | 499288 | 498410 | phosphoserine phosphatase SerB                               | COG0560 | E | 220 | 310 | -90  |
| RCA23_c04680 | 499417 | 499902 | hypothetical protein                                         |         |   | 382 | 415 | -33  |
| RCA23_c04690 | 500025 | 501251 | phosphoserine aminotransferase SerC                          | COG1932 | H | 301 | 441 | -140 |
| RCA23_c04700 | 501306 | 502901 | D-3-phosphoglycerate dehydrogenase SerA                      | COG0111 | H | 369 | 392 | -23  |
| RCA23_c04710 | 502898 | 503629 | metallophosphoesterase                                       |         |   | 240 | 328 | -88  |
| RCA23_c04720 | 504126 | 503641 | RNA pyrophosphohydrolase RppH                                | COG0494 | L | 234 | 236 | -2   |
| RCA23_c04730 | 505467 | 504130 | carboxy-terminal-processing protease CtpA                    | COG0793 | M | 363 | 371 | -8   |
| RCA23_c04740 | 507182 | 505665 | 2,3-bisphosphoglycerate-independent phosphoglycerate m       | COG0696 | G | 294 | 331 | -37  |
| RCA23_c04750 | 507362 | 508978 | putative protein ImuB                                        |         |   | 218 | 304 | -86  |
| RCA23_c04760 | 509201 | 509545 | hypothetical protein                                         |         |   | 401 | 555 | -154 |
| RCA23_c04770 | 510291 | 509542 | hypothetical protein, NlpC/P60                               | COG0791 | M | 244 | 388 | -144 |
| RCA23_c04780 | 511667 | 510288 | putative cytosol aminopeptidase PepA                         | COG0260 | E | 203 | 280 | -77  |
| RCA23_c04790 | 512156 | 511782 | hypothetical protein                                         |         |   | 280 | 370 | -90  |
| RCA23_c04800 | 512302 | 512970 | carbonic anhydrase CynT                                      | COG0288 | P | 701 | 454 | 247  |
| RCA23_c04810 | 514074 | 513052 | aspartate-semialdehyde dehydrogenase Asd                     | COG0136 | E | 777 | 529 | 248  |
| RCA23_c04820 | 515330 | 514140 | MFS-type transporter                                         | COG2223 | P | 321 | 277 | 44   |
| RCA23_c04830 | 515444 | 516199 | short chain dehydrogenase                                    | COG4221 | R | 260 | 362 | -102 |
| RCA23_c04840 | 517557 | 516226 | FAD dependent oxidoreductase                                 | COG0665 | E | 173 | 210 | -37  |



|              |        |        |                                                  |         |   |     |     |      |
|--------------|--------|--------|--------------------------------------------------|---------|---|-----|-----|------|
| RCA23_c04850 | 519110 | 517560 | trimethylamine methyltransferase MttB            | COG5598 | H | 269 | 395 | -126 |
| RCA23_c04860 | 520642 | 519152 | aldehyde dehydrogenase                           | COG1012 | C | 229 | 319 | -90  |
| RCA23_c04870 | 521547 | 520639 | dihydrodipicolinate synthase DapA                | COG0329 | E | 277 | 336 | -59  |
| RCA23_c04880 | 522241 | 521537 | transcriptional regulator, GntR family           | COG1802 | K | 322 | 303 | 19   |
| RCA23_c04890 | 523118 | 522333 | hypothetical protein                             |         |   | 258 | 358 | -100 |
| RCA23_c04900 | 524284 | 523202 | isopropylmalate dehydrogenase LeuB               | COG0473 | C | 304 | 357 | -53  |
| RCA23_c04910 | 525496 | 524363 | hypothetical protein                             |         |   | 267 | 377 | -110 |
| RCA23_c04920 | 526231 | 525626 | 3-isopropylmalate dehydratase small subunit LeuD | COG0066 | E | 458 | 387 | 71   |
| RCA23_c04930 | 527634 | 526231 | 3-isopropylmalate dehydratase large subunit LeuC | COG0065 | E | 288 | 275 | 13   |
| RCA23_c04940 | 528605 | 528072 | hypothetical protein, DUF2975                    |         |   | 207 | 247 | -40  |
| RCA23_c04950 | 528844 | 529257 | hypothetical protein DUF143                      | COG0799 | S | 450 | 364 | 86   |
| RCA23_c04960 | 529257 | 529727 | ribosomal RNA large subunit methyltransferase H  | COG1576 | S | 245 | 311 | -66  |
| RCA23_c04970 | 529799 | 530911 | alcohol dehydrogenase class-3 AdhI               | COG1062 | C | 294 | 435 | -141 |
| RCA23_c04980 | 531014 | 531961 | putative membrane transport protein              | COG0679 | R | 233 | 422 | -189 |
| RCA23_c04990 | 532000 | 532896 | S-formylglutathione hydrolase YeiG               | COG0627 | R | 250 | 354 | -104 |
| RCA23_c05000 | 532900 | 534324 | soluble pyridine nucleotide transhydrogenase     | COG1249 | C | 327 | 370 | -43  |
| RCA23_c05010 | 534321 | 534755 | hypothetical protein DUF188                      | COG1671 | S | 235 | 386 | -151 |
| RCA23_c05020 | 534844 | 535797 | putative integral membrane protein               | COG0697 | G | 439 | 594 | -155 |
| RCA23_c05030 | 535823 | 536443 | putative HAD-superfamily hydrolase               | COG1011 | R | 270 | 379 | -109 |
| RCA23_c05040 | 536452 | 537399 | putative ornithine cyclodeaminase                | COG2423 | E | 225 | 304 | -79  |
| RCA23_c05050 | 541032 | 537361 | aerobic cobaltochelataase subunit CobN           | COG1429 | H | 208 | 291 | -83  |
| RCA23_c05060 | 541732 | 541283 | hypothetical protein, acetyltransferase-like     | COG0456 | R | 273 | 241 | 32   |
| RCA23_c05070 | 542827 | 541736 | protein CobW                                     | COG0523 | R | 298 | 352 | -54  |
| RCA23_c05080 | 542896 | 543240 | hypothetical protein DUF1636                     | COG5469 | S | 269 | 436 | -167 |
| RCA23_c05090 | 543928 | 543248 | possible cobalt transporter, subunit CbtA        | COG5446 | S | 213 | 300 | -87  |
| RCA23_c05100 | 544412 | 545827 | Cytochrome c peroxidase                          | COG1858 | P | 296 | 759 | -463 |
| RCA23_c05110 | 546982 | 545975 | hypothetical protein                             | COG4188 | R | 350 | 299 | 51   |
| RCA23_c05120 | 549014 | 547548 | hypothetical protein                             |         |   | 258 | 381 | -123 |
| RCA23_c05130 | 550285 | 549011 | xylose repressor XylR                            | COG1940 | K | 245 | 284 | -39  |
| RCA23_c05140 | 550504 | 551532 | D-xylose-binding periplasmic protein XylF        | COG4213 | G | 906 | 544 | 362  |

|              |        |        |                                                           |         |   |     |     |      |
|--------------|--------|--------|-----------------------------------------------------------|---------|---|-----|-----|------|
| RCA23_c05150 | 551693 | 553006 | xylose transport system permease protein XylH             | COG4214 | G | 453 | 505 | -52  |
| RCA23_c05160 | 553018 | 553776 | xylose ABC transporter, ATP-binding protein XylG          | COG1129 | G | 597 | 619 | -22  |
| RCA23_c05170 | 553780 | 555234 | xylulose kinase XylB                                      | COG1070 | G | 231 | 268 | -37  |
| RCA23_c05180 | 555316 | 556617 | xylose isomerase XylA                                     | COG2115 | G | 393 | 363 | 30   |
| RCA23_c05190 | 558142 | 556625 | long-chain-fatty-acid--CoA ligase LcfB                    | COG0318 | I | 319 | 296 | 23   |
| RCA23_c05200 | 559391 | 558144 | malonyl-CoA decarboxylase                                 |         |   | 373 | 355 | 18   |
| RCA23_c05210 | 561272 | 559614 | acyl-CoA dehydrogenase                                    | COG1960 | I | 256 | 352 | -96  |
| RCA23_c05220 | 561381 | 562196 | hypothetical protein DUF81                                |         |   | 360 | 365 | -5   |
| RCA23_c05230 | 563871 | 562240 | phosphoenolpyruvate carboxykinase PckA                    | COG1866 | C | 523 | 455 | 68   |
| RCA23_c05240 | 564119 | 564820 | two component signal transduction response regulator rece | COG0745 | T | 486 | 575 | -89  |
| RCA23_c05250 | 564856 | 566508 | two component signal transduction histidine kinase ChvG   | COG0642 | T | 217 | 329 | -112 |
| RCA23_c05260 | 566513 | 566974 | hypothetical protein, HPr serine kinase                   | COG1493 | T | 220 | 332 | -112 |
| RCA23_c05270 | 566967 | 567878 | putative P-loop containing ATPase                         | COG1660 | R | 307 | 374 | -67  |
| RCA23_c05280 | 567875 | 568264 | hypothetical protein, PTS system mannose-specific EIIA co | COG2893 | G | 251 | 493 | -242 |
| RCA23_c05290 | 568274 | 568540 | phosphocarrier protein NPr                                | COG1925 | G | 259 | 480 | -221 |
| RCA23_c05300 | 569551 | 568622 | electron transfer flavoprotein alpha subunit EtfA         | COG2025 | C | 357 | 393 | -36  |
| RCA23_c05310 | 570309 | 569551 | electron transfer flavoprotein beta subunit EtfB          | COG2086 | C | 490 | 366 | 124  |
| RCA23_c05320 | 571054 | 570482 | cob(I)yrinic acid a,c-diamide adenosyltransferase CobO    | COG2096 | S | 330 | 335 | -5   |
| RCA23_c05330 | 572154 | 571324 | putative short chain dehydrogenase                        | COG4221 | R | 327 | 465 | -138 |
| RCA23_c05340 | 572337 | 574667 | DNA topoisomerase 4 subunit A                             | COG0188 | L | 319 | 408 | -89  |
| RCA23_c05350 | 574828 | 576000 | hypothetical protein DUF898                               | COG4269 | S | 147 | 227 | -80  |
| RCA23_c05360 | 576002 | 577117 | peptidase M48 Ste24p                                      | COG4783 | R | 216 | 344 | -128 |
| RCA23_c05370 | 577197 | 577787 | hypothetical protein                                      |         |   | 310 | 426 | -116 |
| RCA23_c05380 | 577907 | 579082 | elongation factor Tu (EF-Tu)                              | COG0050 | J | 14  | 5   | 9    |
| RCA23_c05400 | 580699 | 579374 | hypothetical protein, DUF560                              |         |   | 336 | 441 | -105 |
| RCA23_c05410 | 582022 | 580856 | hippurate hydrolase HipO                                  | COG1473 | R | 256 | 365 | -109 |
| RCA23_c05420 | 583851 | 582037 | glutathione import ATP-binding protein GsiA               | COG1123 | R | 260 | 312 | -52  |
| RCA23_c05430 | 584120 | 585829 | oligopeptide-binding protein AppA                         | COG0747 | E | 394 | 382 | 12   |
| RCA23_c05440 | 585905 | 586912 | oligopeptide transport system permease protein AppB       | COG0601 | E | 420 | 433 | -13  |
| RCA23_c05450 | 586905 | 587870 | oligopeptide transport system permease protein AppC       | COG1173 | E | 428 | 438 | -10  |

|              |        |        |                                                             |         |   |     |     |      |
|--------------|--------|--------|-------------------------------------------------------------|---------|---|-----|-----|------|
| RCA23_c05460 | 587971 | 588900 | ABC transporter ATP-binding protein                         | COG1131 | V | 711 | 476 | 235  |
| RCA23_c05470 | 588897 | 589658 | inner membrane transport permease                           | COG0842 | V | 729 | 644 | 85   |
| RCA23_c05480 | 589709 | 590494 | hypothetical protein, peptidase family S49                  | COG0616 | O | 594 | 456 | 138  |
| RCA23_c05490 | 590678 | 591637 | putative sodium/calcium exchanger protein                   | COG0530 | P | 399 | 489 | -90  |
| RCA23_c05500 | 591649 | 592425 | putative short cprotein                                     | COG1028 | I | 366 | 403 | -37  |
| RCA23_c05510 | 592554 | 594575 | UvrABC system protein C                                     | COG0322 | L | 372 | 374 | -2   |
| RCA23_c05520 | 594704 | 595360 | CDP-diacylglycerol--glycerol-3-phosphate 3-phosphatidyltra  | COG0558 | I | 788 | 670 | 118  |
| RCA23_c05530 | 595366 | 595617 | molybdopterin-converting factor subunit MoaD                | COG1977 | H | 349 | 415 | -66  |
| RCA23_c05540 | 595619 | 596086 | molybdopterin synthase catalytic subunit MoaE               | COG0314 | H | 385 | 464 | -79  |
| RCA23_c05550 | 596425 | 596096 | hypothetical protein                                        |         |   | 362 | 278 | 84   |
| RCA23_c05560 | 598304 | 596418 | hypothetical protein, OmpA                                  | COG2885 | M | 263 | 298 | -35  |
| RCA23_c05570 | 599317 | 598358 | UbiA prenyltransferase                                      | COG0382 | H | 237 | 327 | -90  |
| RCA23_c05580 | 599330 | 600049 | RNA methyltransferase                                       | COG1385 | S | 221 | 259 | -38  |
| RCA23_c05590 | 600046 | 600558 | hypothetical protein                                        |         |   | 265 | 322 | -57  |
| RCA23_c05600 | 600631 | 602001 | glutamate--cysteine ligase                                  | COG3572 | H | 440 | 391 | 49   |
| RCA23_c05610 | 602642 | 602034 | glycerol-3-phosphate acyltransferase PlsY                   | COG0344 | S | 259 | 318 | -59  |
| RCA23_c05620 | 603898 | 602639 | dihydroorotase PyrC                                         | COG0044 | F | 245 | 261 | -16  |
| RCA23_c05630 | 604984 | 604040 | aspartate carbamoyltransferase PyrB                         | COG0540 | F | 333 | 548 | -215 |
| RCA23_c05640 | 605144 | 605956 | uracil DNA glycosylase family protein                       | COG1573 | L | 152 | 228 | -76  |
| RCA23_c05650 | 605953 | 606495 | molybdenum cofactor biosynthesis protein MoaB               | COG0521 | H | 237 | 295 | -58  |
| RCA23_c05660 | 606597 | 608030 | putative efflux transporter, RND family, membrane fusion pr | COG1566 | V | 265 | 305 | -40  |
| RCA23_c05670 | 608034 | 611426 | transporter, AcrB/AcrD/AcrF family                          | COG0841 | V | 347 | 446 | -99  |
| RCA23_c05680 | 612217 | 611423 | hypothetical protein                                        | COG4233 | O | 221 | 319 | -98  |
| RCA23_c05690 | 612351 | 612965 | hypothetical protein DUF179                                 | COG1678 | K | 253 | 362 | -109 |
| RCA23_c05700 | 613054 | 614754 | acyl-CoA dehydrogenase                                      | COG1960 | I | 300 | 339 | -39  |
| RCA23_c05710 | 614764 | 615792 | putative metallo-beta-lactamase family protein              | COG0491 | R | 238 | 425 | -187 |
| RCA23_c05720 | 616040 | 616657 | hypothetical protein                                        |         |   | 369 | 420 | -51  |
| RCA23_c05730 | 616959 | 616630 | putative branched-chain amino acid transport protein        | COG4392 | S | 293 | 366 | -73  |
| RCA23_c05740 | 617657 | 616956 | protein AzlC                                                | COG1296 | E | 276 | 375 | -99  |
| RCA23_c05750 | 617712 | 618581 | formate dehydrogenase accessory protein FdhD                | COG1526 | C | 297 | 394 | -97  |

|              |        |        |                                                            |         |   |     |     |      |
|--------------|--------|--------|------------------------------------------------------------|---------|---|-----|-----|------|
| RCA23_c05760 | 618578 | 619183 | molybdopterin-guanine dinucleotide biosynthesis protein Mc | COG0746 | H | 193 | 329 | -136 |
| RCA23_c05770 | 619180 | 619677 | molybdopterin-guanine dinucleotide biosynthesis protein Mc | COG1763 | H | 159 | 338 | -179 |
| RCA23_c05780 | 619674 | 620930 | molybdopterin biosynthesis protein MoeA                    | COG0303 | H | 162 | 269 | -107 |
| RCA23_c05790 | 621450 | 620965 | transcription elongation factor GreA                       | COG0782 | K | 496 | 392 | 104  |
| RCA23_c05800 | 621745 | 623397 | electron transfer flavoprotein-ubiquinone oxidoreductase   | COG0644 | C | 384 | 446 | -62  |
| RCA23_c05810 | 623502 | 625211 | tetratricopeptide repeat-containing protein                | COG0457 | R | 227 | 360 | -133 |
| RCA23_c05820 | 625201 | 626028 | 4-diphosphocytidyl-2C-methyl-D-erythritol 2-phosphate synt | COG1947 | I | 217 | 334 | -117 |
| RCA23_c05830 | 627043 | 626045 | octaprenyl-diphosphate synthase IspB                       | COG0142 | H | 264 | 336 | -72  |
| RCA23_c05840 | 627656 | 628066 | hypothetical protein, methyltransferase                    | COG4123 | R | 203 | 250 | -47  |
| RCA23_c05850 | 629161 | 628439 | acetoacetyl-CoA reductase PhaB                             | COG1028 | I | 301 | 347 | -46  |
| RCA23_c05860 | 630460 | 629267 | acetyl-CoA acetyltransferase PhaA                          | COG0183 | I | 348 | 300 | 48   |
| RCA23_c05870 | 631425 | 630640 | signaling protein                                          | COG2200 | T | 475 | 385 | 90   |
| RCA23_c05880 | 631516 | 632085 | DNA-3-methyladenine glycosylase 1                          | COG2818 | L | 457 | 429 | 28   |
| RCA23_c05890 | 632617 | 632066 | thiol:disulfide interchange protein TlpA                   | COG0526 | O | 277 | 392 | -115 |
| RCA23_c05900 | 632642 | 634030 | argininosuccinate lyase ArgH                               | COG0165 | E | 259 | 303 | -44  |
| RCA23_c05910 | 634155 | 634472 | hypothetical protein                                       |         |   | 386 | 409 | -23  |
| RCA23_c05920 | 634558 | 635823 | diaminopimelate decarboxylase LysA                         | COG0019 | E | 332 | 435 | -103 |
| RCA23_c05930 | 635848 | 638316 | hypothetical protein                                       | COG1196 | D | 232 | 318 | -86  |
| RCA23_c05940 | 639228 | 639956 | putative acyltransferase                                   | COG0204 | I | 437 | 429 | 8    |
| RCA23_c05950 | 640216 | 640605 | glyoxalase/bleomycin resistance protein                    | COG2764 | S | 365 | 382 | -17  |
| RCA23_c05960 | 640646 | 641269 | hypothetical protein, pyridoxamine 5'-phosphate oxidase    | COG3576 | R | 273 | 303 | -30  |
| RCA23_c05970 | 642246 | 641284 | acetyl-coenzyme A carboxylase carboxyl transferase alpha   | COG0825 | I | 360 | 382 | -22  |
| RCA23_c05980 | 643307 | 642348 | malyl-CoA ligase                                           | COG2301 | G | 231 | 247 | -16  |
| RCA23_c05990 | 643594 | 644595 | hypothetical protein DUF1611                               | COG3367 | S | 277 | 316 | -39  |
| RCA23_c06000 | 644712 | 645674 | L-Ala-D/L-Glu epimerase YcjG                               | COG4948 | M | 259 | 446 | -187 |
| RCA23_c06010 | 645679 | 646539 | D-alanine aminotransferase Dat                             | COG0115 | E | 337 | 480 | -143 |
| RCA23_c06020 | 646631 | 648778 | hypothetical, OmpA-like                                    |         |   | 226 | 313 | -87  |
| RCA23_c06030 | 648803 | 649246 | hypothetical protein                                       | COG3743 | S | 411 | 402 | 9    |
| RCA23_c06040 | 649545 | 649243 | hypothetical protein DUF1244                               | COG3492 | S | 260 | 392 | -132 |
| RCA23_c06050 | 650297 | 649542 | N-formylglutamate amidohydrolase                           | COG3931 | E | 349 | 368 | -19  |

|              |        |        |                                                            |         |   |       |     |      |
|--------------|--------|--------|------------------------------------------------------------|---------|---|-------|-----|------|
| RCA23_c06060 | 650384 | 651832 | pyruvate kinase PykF                                       | COG0469 | G | 393   | 434 | -41  |
| RCA23_c06070 | 651832 | 652062 | hypothetical protein                                       |         |   | 624   | 591 | 33   |
| RCA23_c06080 | 652176 | 652376 | 50S ribosomal protein L35                                  | COG0291 | J | 871   | 606 | 265  |
| RCA23_c06090 | 652391 | 652753 | 50S ribosomal protein L20                                  | COG0292 | J | 873   | 409 | 464  |
| RCA23_c06100 | 652996 | 655311 | putative subtilase family protein                          | COG1404 | O | 455   | 421 | 34   |
| RCA23_c06110 | 655323 | 655715 | hypothetical protein                                       |         |   | 809   | 570 | 239  |
| RCA23_c06120 | 655813 | 656757 | hypothetical protein, lipid A biosynthesis acyltransferase | COG1560 | M | 291   | 395 | -104 |
| RCA23_c06130 | 656869 | 657942 | phenylalanyl-tRNA synthase alpha chain PheS                | COG0016 | J | 304   | 451 | -147 |
| RCA23_c06140 | 657976 | 658701 | glutamine amidotransferase class-I                         | COG0518 | F | 224   | 306 | -82  |
| RCA23_c06150 | 658701 | 661094 | phenylalanyl-tRNA synthase beta chain PheT                 | COG0072 | J | 331   | 354 | -23  |
| RCA23_c06160 | 661282 | 661740 | putative HTH-type transcriptional regulator                | COG1522 | K | 798   | 641 | 157  |
| RCA23_c06170 | 662019 | 661819 | ribosomal protein S21                                      | COG0828 | J | 1.005 | 915 | 90   |
| RCA23_c06180 | 662122 | 662802 | putative ubiquinone biosynthesis protein COQ9              | COG5590 | S | 271   | 315 | -44  |
| RCA23_c06190 | 662830 | 663807 | putative quinone oxidoreductase                            | COG0604 | C | 276   | 335 | -59  |
| RCA23_c06200 | 663977 | 664744 | hypothetical protein DUF1013                               | COG3820 | S | 569   | 525 | 44   |
| RCA23_c06210 | 665637 | 665044 | recombination protein RecR                                 | COG0353 | L | 391   | 437 | -46  |
| RCA23_c06220 | 665998 | 665654 | hypothetical protein                                       | COG0718 | S | 517   | 458 | 59   |
| RCA23_c06230 | 667857 | 666067 | DNA polymerase III subunit tau                             | COG2812 | L | 205   | 268 | -63  |
| RCA23_c06240 | 668143 | 669114 | NADH pyrophosphatase Nudc                                  | COG2816 | L | 277   | 428 | -151 |
| RCA23_c06250 | 669178 | 669648 | hypothetical protein                                       | COG3832 | S | 389   | 485 | -96  |
| RCA23_c06260 | 670475 | 669645 | prephenate dehydratase PheA                                | COG0077 | E | 256   | 261 | -5   |
| RCA23_c06270 | 670580 | 671113 | cytochrome c-552                                           | COG3474 | C | 552   | 407 | 145  |
| RCA23_c06280 | 671321 | 673186 | ABC transporter extracellular solute-binding protein       | COG4166 | E | 474   | 456 | 18   |
| RCA23_c06290 | 673188 | 674267 | ABC transporter permease protein                           | COG4174 | R | 595   | 473 | 122  |
| RCA23_c06300 | 674264 | 675379 | ABC transporter permease protein                           | COG4239 | R | 319   | 447 | -128 |
| RCA23_c06310 | 675376 | 676956 | putative oligopeptide ABC transporter ATP-binding protein  | COG4172 | R | 373   | 488 | -115 |
| RCA23_c06320 | 677633 | 676953 | fumarylacetoacetate hydrolase family protein               | COG0179 | Q | 215   | 253 | -38  |
| RCA23_c06330 | 679120 | 677702 | D-alanyl-D-alanine carboxypeptidase DacF                   | COG1686 | M | 158   | 204 | -46  |
| RCA23_c06340 | 680015 | 679311 | haloacid dehalogenase domain protein hydrolase             | COG1011 | R | 406   | 341 | 65   |
| RCA23_c06350 | 680085 | 680423 | ATP-dependent Clp protease adapter protein ClpS            | COG2127 | S | 541   | 439 | 102  |

|              |        |        |                                                        |         |   |      |     |     |      |
|--------------|--------|--------|--------------------------------------------------------|---------|---|------|-----|-----|------|
| RCA23_c06360 | 680427 | 681377 | putative methyltransferase                             | COG2813 | J |      | 262 | 313 | -51  |
| RCA23_c06370 | 681417 | 682220 | putative short chain dehydrogenase                     | COG1028 | I |      | 340 | 389 | -49  |
| RCA23_c06380 | 682229 | 683110 | coproporphyrinogen 3 oxidase, aerobic                  | COG0408 | H |      | 253 | 334 | -81  |
| RCA23_c06390 | 683515 | 684843 | oxidoreductase, FAD-binding protein                    | COG4097 | P |      | 282 | 382 | -100 |
| RCA23_c06400 | 686376 | 684955 | D-lactate dehydrogenase                                | COG0277 | C |      | 399 | 414 | -15  |
| RCA23_c06420 | 686652 | 688244 | integrase                                              |         |   | GI 3 | 177 | 118 | 59   |
| RCA23_c06430 | 690078 | 688801 | mandelate racemase                                     | COG4948 | M | GI 3 | 36  | 16  | 20   |
| RCA23_c06440 | 690933 | 690091 | fumarylacetoacetate hydrolase family protein           | COG0179 | Q | GI 3 | 11  | 14  | -3   |
| RCA23_c06450 | 691708 | 690977 | short-chain dehydrogenase/reductase                    | COG1028 | I | GI 3 | 29  | 17  | 12   |
| RCA23_c06460 | 692579 | 691701 | amidohydrolase                                         | COG3618 | R | GI 3 | 20  | 19  | 1    |
| RCA23_c06470 | 693475 | 692576 | aldo/keto reductase                                    | COG0667 | C | GI 3 | 5   | 12  | -7   |
| RCA23_c06480 | 694269 | 693475 | ABC transporter, permease protein                      | COG0600 | P | GI 3 | 26  | 17  | 9    |
| RCA23_c06490 | 695094 | 694273 | ABC transporter, permease protein                      | COG0600 | P | GI 3 | 32  | 16  | 16   |
| RCA23_c06500 | 695378 | 695091 | hypothetical protein                                   |         |   | GI 3 | 18  | 11  | 7    |
| RCA23_c06510 | 696208 | 695414 | sulfonate/nitrate ABC transporter, ATPase              | COG1116 | P | GI 3 | 12  | 10  | 2    |
| RCA23_c06520 | 697212 | 696214 | ABC transporter, periplasmic substrate-binding protein | COG0715 | P | GI 3 | 37  | 10  | 27   |
| RCA23_c06530 | 698756 | 697293 | arylsulfatase                                          | COG3119 | P | GI 3 | 18  | 10  | 8    |
| RCA23_c06540 | 699421 | 698753 | transcriptional regulator, GntR family                 | COG1802 | K | GI 3 | 18  | 11  | 7    |
| RCA23_c06550 | 700594 | 700028 | hypothetical protein                                   | COG4974 | L | GI 3 | 18  | 32  | -14  |
| RCA23_c06560 | 701422 | 700781 | hypothetical protein                                   | COG1618 | F | GI 3 | 59  | 54  | 5    |
| RCA23_c06570 | 702310 | 701492 | hypothetical protein                                   |         |   | GI 3 | 393 | 273 | 120  |
| RCA23_c06580 | 702492 | 703271 | hypothetical protein                                   |         |   | GI 3 | 142 | 92  | 50   |
| RCA23_c06590 | 703826 | 703494 | hypothetical protein                                   |         |   | GI 3 | 885 | 731 | 154  |
| RCA23_c06600 | 704277 | 703819 | hypothetical protein                                   |         |   | GI 3 | 675 | 432 | 243  |
| RCA23_c06610 | 705323 | 704697 | hypothetical protein                                   |         |   | GI 3 | 515 | 372 | 143  |
| RCA23_c06620 | 705475 | 705801 | hypothetical protein                                   |         |   | GI 3 | 472 | 348 | 124  |
| RCA23_c06630 | 706774 | 707259 | hypothetical protein                                   | COG3000 | I | GI 3 | 9   | 7   | 2    |
| RCA23_c06640 | 707893 | 707468 | transcriptional regulator, AsnC family                 | COG1522 | K | GI 3 | 31  | 39  | -8   |
| RCA23_c06650 | 707989 | 709179 | aspartate aminotransferase AspC                        | COG0436 | E | GI 3 | 8   | 32  | -24  |
| RCA23_c06660 | 709204 | 709950 | 3-hydroxybutyrate dehydrogenase Bdh                    | COG1028 | I | GI 3 | 5   | 26  | -21  |

|              |        |        |                                                          |         |   |      |     |     |      |
|--------------|--------|--------|----------------------------------------------------------|---------|---|------|-----|-----|------|
| RCA23_c06670 | 709963 | 710817 | putative fumarylacetoacetate hydrolase                   | COG0179 | Q | GI 3 | 9   | 43  | -34  |
| RCA23_c06680 | 710820 | 711548 | oxidoreductase, short chain dehydrogenase/reductase fami | COG1028 | I | GI 3 | 11  | 45  | -34  |
| RCA23_c06690 | 711582 | 712247 | dimethylmenaquinone methyltransferase                    | COG0684 | H | GI 3 | 29  | 50  | -21  |
| RCA23_c06700 | 712286 | 713434 | hypothetical protein                                     | COG3970 | R | GI 3 | 6   | 3   | 3    |
| RCA23_c06710 | 713447 | 714952 | NADP-dependent fatty aldehyde dehydrogenase AldH         | COG1012 | C | GI 3 | 3   | 2   | 1    |
| RCA23_c06720 | 714981 | 715886 | putative dihydrodipicolinate synthase                    | COG0329 | E | GI 3 | 1   | 0   | 1    |
| RCA23_c06730 | 716879 | 716205 | transcriptional regulator protein, Lacl family           | COG1609 | K | GI 3 | 33  | 53  | -20  |
| RCA23_c06740 | 717413 | 718414 | TRAP dicarboxylate transporter, subunit DctP             | COG1638 | G | GI 3 | 9   | 9   | 0    |
| RCA23_c06750 | 718496 | 719083 | TRAP dicarboxylate transporter, subunit DctQ             | COG3090 | G | GI 3 | 10  | 14  | -4   |
| RCA23_c06760 | 719077 | 720369 | TRAP dicarboxylate transporter, subunit DctM             | COG1593 | G | GI 3 | 9   | 11  | -2   |
| RCA23_c06770 | 720515 | 721783 | D-amino acid dehydrogenase small subunit DadA            | COG0665 | E | GI 3 | 21  | 32  | -11  |
| RCA23_c06780 | 721815 | 722963 | mandelate racemase/muconate lactonizing protein          | COG4948 | M | GI 3 | 30  | 54  | -24  |
| RCA23_c06790 | 722960 | 723874 | dihydrodipicolinate synthase DapA                        | COG0329 | E | GI 3 | 20  | 31  | -11  |
| RCA23_c06800 | 723995 | 725005 | uncharacterized oxidoreductase, YjmC                     | COG2055 | C | GI 3 | 22  | 34  | -12  |
| RCA23_c06810 | 725230 | 726555 | sarcosine oxidase beta subunit SoxB                      | COG0665 | E | GI 3 | 11  | 28  | -17  |
| RCA23_c06820 | 726567 | 726854 | sarcosine oxidase delta subunit SoxD                     | COG4311 | E | GI 3 | 13  | 24  | -11  |
| RCA23_c06830 | 726851 | 729808 | sarcosine oxidase alpha subunit SoxA                     | COG0404 | E | GI 3 | 11  | 27  | -16  |
| RCA23_c06840 | 729801 | 730364 | sarcosine oxidase gamma subunit SoxG                     | COG4583 | E | GI 3 | 61  | 59  | 2    |
| RCA23_c06850 | 730372 | 731262 | hypothetical protein, DUF6 transmembrane protein         | COG0697 | G | GI 3 | 44  | 63  | -19  |
| RCA23_c06860 | 732526 | 734097 | putative phage integrase                                 |         |   | GI 3 | 112 | 112 | 0    |
| RCA23_c06870 | 734370 | 735797 | putative amidase                                         | COG0154 | J | GI 3 | 49  | 26  | 23   |
| RCA23_c06880 | 736558 | 735992 | integrase                                                | COG4974 | L | GI 3 | 37  | 23  | 14   |
| RCA23_c06890 | 737386 | 736745 | putative helicase                                        |         |   | GI 3 | 48  | 32  | 16   |
| RCA23_c06900 | 737522 | 738220 | transposase                                              | COG3316 | L | GI 3 | 491 | 601 | -110 |
| RCA23_c06910 | 739014 | 738397 | HTH-type transcriptional regulator, LuxR family          | COG2197 | T | GI 3 | 34  | 36  | -2   |
| RCA23_c06920 | 739172 | 739651 | putative oxidoreductase, molybdopterin binding           | COG3915 | S | GI 3 | 39  | 27  | 12   |
| RCA23_c06930 | 739769 | 742216 | signal transduction histidine kinase                     | COG0642 | T | GI 3 | 52  | 35  | 17   |
| RCA23_c06940 | 742420 | 743505 | glucose-1-phosphate thymidyltransferase RfbA             | COG1209 | M | GI 3 | 61  | 48  | 13   |
| RCA23_c06950 | 743565 | 745631 | hypothetical protein, chain length determinant protein   | COG0489 | D | GI 3 | 59  | 63  | -4   |
| RCA23_c06960 | 745621 | 747042 | polysaccharide export protein                            | COG1596 | M | GI 3 | 56  | 55  | 1    |

|              |        |        |                                                            |         |   |      |     |     |     |
|--------------|--------|--------|------------------------------------------------------------|---------|---|------|-----|-----|-----|
| RCA23_c06970 | 747621 | 748013 | hypothetical protein, VanZ-like                            | COG5652 | S | GI 3 | 100 | 76  | 24  |
| RCA23_c06980 | 749389 | 748190 | type I secretion system membrane fusion protein, HlyD fam  | COG1566 | V | GI 3 | 76  | 75  | 1   |
| RCA23_c06990 | 751598 | 749475 | type I secretion system ATP-binding component, HlyB famil  | COG2274 | V | GI 3 | 96  | 91  | 5   |
| RCA23_c07000 | 752950 | 751595 | type I secretion outer membrane protein, TolC family       | COG1538 | M | GI 3 | 63  | 59  | 4   |
| RCA23_c07010 | 754718 | 752955 | putative serralyisin-like metalloprotease                  | COG2931 | Q | GI 3 | 104 | 122 | -18 |
| RCA23_c07020 | 755773 | 754919 | dTDP-4-dehydrorhamnose reductase RfbD                      | COG1091 | M | GI 3 | 20  | 33  | -13 |
| RCA23_c07030 | 756831 | 755770 | dTDP-glucose 4,6-dehydratase RfbB                          | COG1088 | M | GI 3 | 19  | 42  | -23 |
| RCA23_c07040 | 757401 | 756838 | dTDP-4-dehydrorhamnose 3,5-epimerase RfbC                  | COG1898 | M | GI 3 | 22  | 40  | -18 |
| RCA23_c07050 | 758505 | 757435 | hypothetical protein                                       |         |   | GI 3 | 148 | 223 | -75 |
| RCA23_c07060 | 759584 | 758505 | glycosyltransferase                                        | COG0438 | M | GI 3 | 33  | 43  | -10 |
| RCA23_c07070 | 761170 | 759905 | putative glycosyltransferase                               | COG0438 | M | GI 3 | 38  | 25  | 13  |
| RCA23_c07080 | 762479 | 761430 | hypothetical protein, UDP-glycosyltransferase/glycogen phc | COG0438 | M | GI 3 | 10  | 28  | -18 |
| RCA23_c07090 | 764009 | 762492 | polysaccharide biosynthesis protein                        |         |   | GI 3 | 33  | 56  | -23 |
| RCA23_c07100 | 765109 | 764015 | UDP-4-amino-4-deoxy-L-arabinose--oxoglutarate aminotrar    | COG0399 | M | GI 3 | 24  | 51  | -27 |
| RCA23_c07110 | 765867 | 765106 | hypothetical, WxcM-like                                    | COG0110 | R | GI 3 | 13  | 35  | -22 |
| RCA23_c07120 | 766099 | 765860 | hypothetical protein, WxcM-like                            |         |   | GI 3 | 46  | 77  | -31 |
| RCA23_c07130 | 766651 | 766103 | hypothetical protein, acyltransferase-like                 | COG1670 | J | GI 3 | 42  | 46  | -4  |
| RCA23_c07140 | 767913 | 766648 | UDP-glucose/GDP-mannose dehydrogenase family protein       | COG0677 | M | GI 3 | 73  | 172 | -99 |
| RCA23_c07150 | 768637 | 767906 | S-adenosyl-L-methionine-dependent methyltransferase        |         |   | GI 3 | 28  | 48  | -20 |
| RCA23_c07160 | 769668 | 768634 | UDP-glucuronate 5'-epimerase LspL                          | COG0451 | M | GI 3 | 105 | 167 | -62 |
| RCA23_c07170 | 770090 | 769713 | transcriptional regulator, MarR family                     | COG1846 | K | GI 3 | 42  | 63  | -21 |
| RCA23_c07180 | 770490 | 771002 | transcription antitermination protein NusG                 | COG0250 | K | GI 3 | 53  | 62  | -9  |
| RCA23_c07190 | 771959 | 771234 | hypothetical protein                                       | COG1434 | S | GI 3 | 9   | 28  | -19 |
| RCA23_c07200 | 773130 | 771961 | lipopolysaccharide core biosynthesis mannosyltransferase I | COG0438 | M | GI 3 | 10  | 34  | -24 |
| RCA23_c07210 | 773759 | 773974 | hypothetical protein                                       |         |   | GI 3 | 21  | 47  | -26 |
| RCA23_c07220 | 774136 | 775224 | undecaprenyl-phosphate alpha-N-acetylglucosaminyl 1-pho    | COG0472 | M | GI 3 | 54  | 68  | -14 |
| RCA23_c07230 | 775393 | 775839 | hypothetical protein, transmembrane                        |         |   | GI 3 | 8   | 10  | -2  |
| RCA23_c07240 | 775844 | 776335 | hypothetical protein, transmembrane                        |         |   | GI 3 | 5   | 12  | -7  |
| RCA23_c07250 | 777374 | 776907 | transposase, IS4 family protein                            |         |   | GI 3 | 31  | 65  | -34 |
| RCA23_c07260 | 777803 | 777396 | putative transposase                                       | COG3039 | L | GI 3 | 20  | 43  | -23 |



|              |        |        |                                                             |         |   |      |     |     |      |
|--------------|--------|--------|-------------------------------------------------------------|---------|---|------|-----|-----|------|
| RCA23_c07270 | 778001 | 778423 | hypothetical protein, transmembrane                         |         |   | GI 3 | 15  | 10  | 5    |
| RCA23_c07280 | 778428 | 778958 | hypothetical protein, transmembrane                         |         |   | GI 3 | 20  | 11  | 9    |
| RCA23_c07290 | 779627 | 780334 | transposase                                                 | COG3316 | L | GI 3 | 2   | 0   | 2    |
| RCA23_c07300 | 780406 | 780888 | glycogen synthase GlgA                                      | COG0297 | G | GI 3 | 30  | 39  | -9   |
| RCA23_c07310 | 780903 | 782972 | glycogen debranching enzyme GlgX                            | COG1523 | G | GI 3 | 71  | 40  | 31   |
| RCA23_c07320 | 783008 | 784639 | phosphoglucomutase Pgm                                      | COG0033 | G | GI 3 | 102 | 70  | 32   |
| RCA23_c07330 | 786248 | 784641 | putative alpha-glucosidase AglA                             | COG0366 | G | GI 3 | 83  | 58  | 25   |
| RCA23_c07340 | 786430 | 787128 | transposase                                                 | COG3316 | L | GI 3 | 425 | 503 | -78  |
| RCA23_c07350 | 787553 | 788764 | uncharacterized hydrolase YtnL                              | COG1473 | R | GI 3 | 507 | 377 | 130  |
| RCA23_c07360 | 789242 | 790729 | glutathione-binding protein GsiB                            | COG0747 | E | GI 3 | 315 | 289 | 26   |
| RCA23_c07370 | 790792 | 791688 | glutathione transport system permease protein GsiC          | COG0601 | E | GI 3 | 208 | 284 | -76  |
| RCA23_c07380 | 791735 | 792535 | dipeptide transport system permease protein                 | COG1173 | E | GI 3 | 267 | 375 | -108 |
| RCA23_c07390 | 792532 | 794106 | glutathione import ATP-binding protein GsiA                 | COG4172 | R | GI 3 | 231 | 291 | -60  |
| RCA23_c07400 | 794103 | 795125 | peptidase family S58                                        | COG3191 | E | GI 3 | 192 | 322 | -130 |
| RCA23_c07410 | 795122 | 796576 | aldehyde dehydrogenase AldA                                 | COG1012 | C | GI 3 | 211 | 236 | -25  |
| RCA23_c07420 | 796585 | 797325 | 3-oxoacyl-[acyl-carrier-protein] reductase FabG             | COG1028 | I | GI 3 | 252 | 304 | -52  |
| RCA23_c07430 | 797368 | 798825 | amidase                                                     | COG0154 | J | GI 3 | 305 | 284 | 21   |
| RCA23_c07440 | 800908 | 799691 | MFS-type transporter                                        | COG2807 | P | GI 3 | 377 | 182 | 195  |
| RCA23_c07450 | 801403 | 802311 | peptidase M20D amidohydrolase                               | COG1473 | R | GI 3 | 8   | 4   | 4    |
| RCA23_c07460 | 802343 | 802858 | transposase                                                 | COG3316 | L | GI 3 | 8   | 5   | 3    |
| RCA23_c07470 | 802913 | 803992 | integrase                                                   | COG2801 | L | GI 3 | 0   | 0   | 0    |
| RCA23_c07480 | 804013 | 804228 | transposase                                                 |         |   | GI 3 | 0   | 3   | -3   |
| RCA23_c07490 | 804774 | 804520 | hypothetical protein, DUF3764                               |         |   | GI 3 | 230 | 97  | 133  |
| RCA23_c07500 | 805349 | 804861 | hypothetical protein                                        |         |   | GI 3 | 65  | 47  | 18   |
| RCA23_c07510 | 805760 | 806716 | hypothetical protein, beta-lactam-insensitive peptidoglycan | COG1376 | S | GI 3 | 158 | 81  | 77   |
| RCA23_c07520 | 807253 | 807663 | hypothetical protein                                        |         |   | GI 3 | 286 | 208 | 78   |
| RCA23_c07530 | 809049 | 807802 | ABC transporter, ATP-binding protein, SbmA/BacA-like fam    | COG1133 | I | GI 3 | 53  | 47  | 6    |
| RCA23_c07540 | 809116 | 809526 | hypothetical protein                                        |         |   | GI 3 | 67  | 64  | 3    |
| RCA23_c07550 | 809659 | 809790 | hypothetical protein                                        |         |   | GI 3 | 141 | 42  | 99   |
| RCA23_c07560 | 810944 | 809865 | integrase                                                   | COG2801 | L | GI 3 | 0   | 0   | 0    |

|              |        |        |                                                      |         |   |      |     |     |     |
|--------------|--------|--------|------------------------------------------------------|---------|---|------|-----|-----|-----|
| RCA23_c07570 | 811605 | 811252 | hypothetical protein                                 |         |   | GI 3 | 8   | 5   | 3   |
| RCA23_c07580 | 812189 | 812058 | hypothetical protein                                 |         |   | GI 3 | 26  | 6   | 20  |
| RCA23_c07590 | 814705 | 812846 | flagellin FliC                                       | COG1344 | N | GI 3 | 26  | 16  | 10  |
| RCA23_c07600 | 815060 | 816535 | RNA polymerase sigma-54                              | COG1508 | K | GI 3 | 135 | 86  | 49  |
| RCA23_c07610 | 816917 | 816549 | hypothetical protein, cyclic nucleotide-binding-like |         |   | GI 3 | 141 | 82  | 59  |
| RCA23_c07620 | 817270 | 816917 | hypothetical protein                                 | COG0664 | T | GI 3 | 133 | 74  | 59  |
| RCA23_c07630 | 818209 | 817400 | hypothetical protein                                 |         |   | GI 3 | 213 | 115 | 98  |
| RCA23_c07640 | 819031 | 818219 | hypothetical protein                                 |         |   | GI 3 | 368 | 158 | 210 |
| RCA23_c07650 | 819467 | 819249 | hypothetical protein                                 |         |   | GI 3 | 386 | 127 | 259 |
| RCA23_c07660 | 820626 | 819469 | flagellar biosynthesis protein FlhB                  | COG1377 | N | GI 3 | 257 | 130 | 127 |
| RCA23_c07670 | 821440 | 820619 | flagellar biosynthetic protein FliR                  | COG1684 | N | GI 3 | 329 | 132 | 197 |
| RCA23_c07680 | 821706 | 821437 | flagellar biosynthetic protein FliQ                  | COG1987 | N | GI 3 | 317 | 104 | 213 |
| RCA23_c07690 | 822534 | 821713 | flagellar biosynthetic protein FliP                  | COG1338 | N | GI 3 | 239 | 115 | 124 |
| RCA23_c07700 | 823188 | 822874 | flagellar motor switch protein FliN                  | COG1886 | N | GI 3 | 289 | 124 | 165 |
| RCA23_c07710 | 824193 | 823201 | flagellar motor switch proteins FliM                 | COG1868 | N | GI 3 | 246 | 108 | 138 |
| RCA23_c07720 | 824801 | 824208 | protein FliL                                         | COG1580 | N | GI 3 | 391 | 159 | 232 |
| RCA23_c07730 | 826771 | 824819 | putative flagellar hook-length control protein FliK  | COG3144 | N | GI 3 | 140 | 72  | 68  |
| RCA23_c07740 | 827248 | 826829 | putative flagellar export protein FliJ               |         |   | GI 3 | 144 | 84  | 60  |
| RCA23_c07750 | 828581 | 827250 | flagellar protein export ATPase FliI                 | COG1157 | N | GI 3 | 114 | 77  | 37  |
| RCA23_c07760 | 829597 | 828578 | putative flagellar assembly protein FliH             |         |   | GI 3 | 127 | 93  | 34  |
| RCA23_c07770 | 830634 | 829594 | flagellar motor switch protein G                     | COG1536 | N | GI 3 | 199 | 111 | 88  |
| RCA23_c07780 | 832414 | 830663 | flagellar M-ring protein FliF                        | COG1766 | N | GI 3 | 232 | 111 | 121 |
| RCA23_c07790 | 832771 | 832457 | flagellar hook-basal body complex subunit FliE       | COG1677 | N | GI 3 | 213 | 77  | 136 |
| RCA23_c07800 | 833940 | 832786 | transcriptional regulatory protein FlbD              | COG2204 | T | GI 3 | 241 | 104 | 137 |
| RCA23_c07810 | 834232 | 834771 | protein FliL                                         | COG1580 | N | GI 3 | 61  | 56  | 5   |
| RCA23_c07820 | 834836 | 835009 | hypothetical protein                                 |         |   | GI 3 | 115 | 56  | 59  |
| RCA23_c07830 | 835109 | 835480 | flagellar protein FliS                               | COG1516 | N | GI 3 | 167 | 93  | 74  |
| RCA23_c07840 | 835599 | 836012 | hypothetical protein                                 |         |   | GI 3 | 232 | 133 | 99  |
| RCA23_c07850 | 836532 | 836771 | hypothetical protein                                 |         |   | GI 3 | 93  | 80  | 13  |
| RCA23_c07860 | 837607 | 836804 | flagellar basal-body rod protein FlgG                | COG4786 | N | GI 3 | 112 | 62  | 50  |

|              |        |        |                                                         |         |   |      |     |     |     |
|--------------|--------|--------|---------------------------------------------------------|---------|---|------|-----|-----|-----|
| RCA23_c07870 | 837665 | 839437 | Cl- channel, voltage-gated family protein               | COG0038 | P | GI 3 | 104 | 68  | 36  |
| RCA23_c07880 | 840278 | 839442 | hypothetical protein, lysozym-like                      | COG0741 | M | GI 3 | 195 | 92  | 103 |
| RCA23_c07890 | 841546 | 840275 | flagellar hook-associated protein FlgL                  | COG1344 | N | GI 3 | 211 | 119 | 92  |
| RCA23_c07900 | 845822 | 841581 | flagellar hook-associated protein FlgK                  | COG1256 | N | GI 3 | 153 | 98  | 55  |
| RCA23_c07910 | 846175 | 845825 | flagellar rod assembly protein/muramidase FlgJ          | COG3951 | M | GI 3 | 135 | 104 | 31  |
| RCA23_c07920 | 847324 | 846188 | flagellar P-ring protein FlgI                           | COG1706 | N | GI 3 | 94  | 71  | 23  |
| RCA23_c07930 | 847901 | 847338 | flagellar L-ring protein FlgH                           | COG2063 | N | GI 3 | 244 | 102 | 142 |
| RCA23_c07940 | 848820 | 848032 | flagellar basal-body rod protein FlgG                   | COG4786 | N | GI 3 | 249 | 113 | 136 |
| RCA23_c07950 | 849559 | 848882 | putative flagellar basal body rod protein FlgF          | COG4786 | N | GI 3 | 295 | 125 | 170 |
| RCA23_c07960 | 853429 | 849668 | flagellar hook protein FlgE                             | COG1749 | N | GI 3 | 209 | 100 | 109 |
| RCA23_c07970 | 854213 | 853497 | flagellar basal body rod modification protein FlgD      | COG1843 | N | GI 3 | 181 | 100 | 81  |
| RCA23_c07980 | 854630 | 854214 | flagellar basal-body rod protein FlgC                   | COG1558 | N | GI 3 | 213 | 123 | 90  |
| RCA23_c07990 | 855018 | 854632 | flagellar basal-body rod protein FlgB                   | COG1815 | N | GI 3 | 313 | 132 | 181 |
| RCA23_c08000 | 855113 | 855655 | hypothetical protein                                    |         |   | GI 3 | 220 | 107 | 113 |
| RCA23_c08010 | 855658 | 856014 | hypothetical protein                                    |         |   | GI 3 | 197 | 80  | 117 |
| RCA23_c08020 | 856748 | 856023 | RNA polymerase, sigma factor for flagellar operon FliA  | COG1191 | K | GI 3 | 268 | 92  | 176 |
| RCA23_c08030 | 857551 | 856745 | putative flagellar biosynthesis protein FlhG            | COG0455 | D | GI 3 | 198 | 108 | 90  |
| RCA23_c08040 | 858864 | 857548 | flagellar biosynthesis protein FlhF                     | COG1419 | N | GI 3 | 195 | 100 | 95  |
| RCA23_c08050 | 861023 | 858861 | flagellar biosynthesis protein FlhA                     | COG1298 | N | GI 3 | 263 | 115 | 148 |
| RCA23_c08060 | 861272 | 861865 | hypothetical membrane lipoprotein, DUF400               |         |   | GI 3 | 172 | 125 | 47  |
| RCA23_c08070 | 861871 | 863016 | hypothetical protein                                    |         |   | GI 3 | 101 | 55  | 46  |
| RCA23_c08080 | 863013 | 863753 | flagellar basal body P-ring biosynthesis protein FlgA   | COG1261 | N | GI 3 | 126 | 70  | 56  |
| RCA23_c08090 | 863767 | 864087 | putative negative regulator of flagellin synthesis FlgM |         |   | GI 3 | 206 | 93  | 113 |
| RCA23_c08100 | 864117 | 864407 | hypothetical protein                                    |         |   | GI 3 | 258 | 96  | 162 |
| RCA23_c08110 | 865057 | 864425 | hypothetical protein, HCP-like                          | COG0790 | R | GI 3 | 235 | 100 | 135 |
| RCA23_c08120 | 865443 | 865054 | hypothetical protein                                    |         |   | GI 3 | 143 | 71  | 72  |
| RCA23_c08130 | 865619 | 866770 | sigma54 specific transcriptional regulator, Fis family  | COG2204 | T | GI 3 | 203 | 110 | 93  |
| RCA23_c08140 | 868379 | 866742 | flagellar hook-associated protein FliD                  | COG1345 | N | GI 3 | 223 | 93  | 130 |
| RCA23_c08150 | 869677 | 868454 | chemotaxis protein MotB                                 | COG1360 | N | GI 3 | 231 | 134 | 97  |
| RCA23_c08160 | 870477 | 869716 | chemotaxis protein MotA                                 | COG1291 | N | GI 3 | 299 | 109 | 190 |

|              |        |        |                                                            |         |   |      |     |     |     |
|--------------|--------|--------|------------------------------------------------------------|---------|---|------|-----|-----|-----|
| RCA23_c08170 | 870634 | 871101 | hypothetical protein, DUF1566                              |         |   | GI 3 | 266 | 154 | 112 |
| RCA23_c08180 | 872040 | 871126 | putative transmembrane protein, DUF6                       |         |   | GI 3 | 397 | 243 | 154 |
| RCA23_c08190 | 874242 | 872701 | putative polyketide hydroxylase SchC                       | COG0654 | H | GI 3 | 97  | 68  | 29  |
| RCA23_c08200 | 875672 | 874248 | aldehyde dehydrogenase                                     | COG1012 | C |      | 60  | 52  | 8   |
| RCA23_c08210 | 876685 | 875669 | 2-amino-3-carboxymuconate-6-semialdehyde decarboxylas      | COG2159 | R |      | 118 | 61  | 57  |
| RCA23_c08220 | 877470 | 876682 | transcriptional regulator, lclR family                     | COG1414 | K |      | 66  | 69  | -3  |
| RCA23_c08230 | 879401 | 877467 | TRAP transporter, 4TM/12TM fusion protein                  | COG4666 | R |      | 129 | 84  | 45  |
| RCA23_c08240 | 880430 | 879408 | TRAP transporter solute receptor, TAXI family              | COG2358 | R |      | 86  | 70  | 16  |
| RCA23_c08250 | 880496 | 882190 | thiamine pyrophosphate enzyme-like TPP-binding             | COG0028 | E |      | 76  | 72  | 4   |
| RCA23_c08260 | 883788 | 882265 | hypothetical protein                                       | COG2268 | S |      | 86  | 60  | 26  |
| RCA23_c08270 | 884588 | 883800 | short chain dehydrogenase                                  | COG1028 | I |      | 72  | 42  | 30  |
| RCA23_c08280 | 886066 | 884591 | putative aldehyde dehydrogenase yfmT                       | COG1012 | C |      | 119 | 66  | 53  |
| RCA23_c08290 | 887201 | 886068 | branched-chain amino acid ABC transporter, ATP-binding p   | COG0410 | E |      | 113 | 70  | 43  |
| RCA23_c08300 | 887913 | 887194 | branched-chain amino acid ABC transporter, ATP-binding p   | COG0411 | E |      | 146 | 96  | 50  |
| RCA23_c08310 | 888863 | 887931 | putative transporter, permease protein                     | COG4177 | E |      | 173 | 81  | 92  |
| RCA23_c08320 | 889732 | 888860 | putative transporter, permease protein                     | COG0559 | E |      | 110 | 69  | 41  |
| RCA23_c08330 | 890937 | 889783 | putative transporter, periplasmic binding protein          | COG0683 | E |      | 122 | 74  | 48  |
| RCA23_c08340 | 892154 | 891102 | hypothetical protein, PrpF protein-like                    | COG2828 | S |      | 55  | 59  | -4  |
| RCA23_c08350 | 892833 | 892168 | 4-carboxy-4-hydroxy-2-oxoadipate aldolase/oxaloacetate de  | COG0684 | H |      | 56  | 60  | -4  |
| RCA23_c08360 | 893753 | 893019 | putative N-acetylglucosaminyl-phosphatidylinositol de-N-ac | COG2120 | S |      | 107 | 67  | 40  |
| RCA23_c08370 | 894248 | 894994 | hypothetical protein                                       |         |   |      | 161 | 125 | 36  |
| RCA23_c08380 | 895147 | 895896 | transcriptional regulator                                  | COG1802 | K |      | 93  | 88  | 5   |
| RCA23_c08390 | 895914 | 897314 | aminomethyltransferase GcvT                                | COG0404 | E |      | 185 | 101 | 84  |
| RCA23_c08400 | 897391 | 898368 | TRAP dicarboxylate transporter, subunit DctP               | COG1638 | G |      | 97  | 61  | 36  |
| RCA23_c08410 | 898371 | 898883 | TRAP dicarboxylate transporter, subunit DctQ               | COG3090 | G |      | 178 | 92  | 86  |
| RCA23_c08420 | 898880 | 900184 | TRAP dicarboxylate transporter, subunit DctM               | COG1593 | G |      | 153 | 93  | 60  |
| RCA23_c08430 | 900268 | 901209 | metapyrocatechase XylE                                     | COG2514 | R |      | 158 | 84  | 74  |
| RCA23_c08440 | 901273 | 902451 | MFS-type transporter                                       | COG2814 | G |      | 111 | 95  | 16  |
| RCA23_c08450 | 902749 | 903183 | hypothetical protein, cytochrome c                         |         |   |      | 143 | 79  | 64  |
| RCA23_c08460 | 903218 | 903562 | hypothetical protein, copper resistance protein C          | COG2372 | R |      | 155 | 96  | 59  |

|              |        |        |                                                           |         |   |     |     |      |
|--------------|--------|--------|-----------------------------------------------------------|---------|---|-----|-----|------|
| RCA23_c08470 | 903559 | 904410 | hypothetical protein, copper resistance protein D         | COG1276 | P | 165 | 111 | 54   |
| RCA23_c08480 | 904753 | 905184 | hypothetical protein                                      | COG3613 | F | 132 | 101 | 31   |
| RCA23_c08490 | 906165 | 905899 | hypothetical protein                                      |         |   | 227 | 118 | 109  |
| RCA23_c08500 | 906640 | 906996 | hypothetical protein                                      |         |   | 170 | 169 | 1    |
| RCA23_c08510 | 908415 | 907033 | fumarate reductase flavoprotein subunit                   | COG1053 | C | 185 | 220 | -35  |
| RCA23_c08520 | 909253 | 908387 | methylisocitrate lyase PrpB                               | COG2513 | G | 240 | 253 | -13  |
| RCA23_c08530 | 909870 | 909250 | putative isochorismatase family protein                   | COG1335 | Q | 229 | 231 | -2   |
| RCA23_c08540 | 911929 | 909872 | hydantoin utilization protein A                           | COG0145 | E | 178 | 191 | -13  |
| RCA23_c08550 | 913620 | 911926 | hydantoin utilization protein B                           | COG0146 | E | 229 | 209 | 20   |
| RCA23_c08560 | 914183 | 913617 | hypothetical protein                                      | COG1942 | R | 249 | 209 | 40   |
| RCA23_c08570 | 914328 | 915128 | HTH-type transcriptional regulator, GntR family           | COG2188 | K | 138 | 206 | -68  |
| RCA23_c08580 | 915125 | 916531 | 3-isopropylmalate dehydratase large subunit LeuC          | COG0065 | E | 226 | 214 | 12   |
| RCA23_c08590 | 916558 | 917142 | 3-isopropylmalate dehydratase small subunit LeuD          | COG0066 | E | 214 | 212 | 2    |
| RCA23_c08600 | 917203 | 918216 | TRAP dicarboxylate transporter, subunit DctP              | COG1638 | G | 530 | 304 | 226  |
| RCA23_c08610 | 918309 | 918773 | TRAP transporter, subunit DctQ                            | COG3090 | G | 514 | 328 | 186  |
| RCA23_c08620 | 918773 | 920080 | TRAP dicarboxylate transporter, subunit DctM              | COG1593 | G | 622 | 381 | 241  |
| RCA23_c08630 | 920337 | 921674 | putative glutamate synthase [NADPH] small chain           | COG0493 | E | 375 | 303 | 72   |
| RCA23_c08640 | 921674 | 922978 | hypothetical protein, dihydroorotate dehydrogenase        | COG0167 | F | 574 | 518 | 56   |
| RCA23_c08650 | 923623 | 923021 | putative HTH-type transcriptional regulator               | COG1309 | K | 816 | 569 | 247  |
| RCA23_c08660 | 923793 | 925058 | N-carbamoyl-L-amino acid hydrolase AmaB                   | COG0624 | E | 600 | 475 | 125  |
| RCA23_c08670 | 925095 | 926549 | D-hydantoinase/dihydropyrimidinase Dht                    | COG0044 | F | 586 | 467 | 119  |
| RCA23_c08680 | 926592 | 927374 | ABC transporter ATP-binding protein                       | COG1116 | P | 627 | 416 | 211  |
| RCA23_c08690 | 927402 | 928322 | putative ABC transporter permease protein                 | COG0600 | P | 660 | 505 | 155  |
| RCA23_c08700 | 928319 | 929161 | putative ABC transporter permease protein                 | COG0600 | P | 913 | 619 | 294  |
| RCA23_c08710 | 929210 | 930205 | putative thiamine biosynthesis protein                    | COG0715 | P | 713 | 465 | 248  |
| RCA23_c08720 | 931297 | 930413 | putative integral membrane protein DUF6                   | COG0697 | G | 967 | 590 | 377  |
| RCA23_c08730 | 932791 | 931913 | hypothetical protein DUF6                                 | COG0697 | G | 693 | 436 | 257  |
| RCA23_c08740 | 933010 | 934104 | alkaline phosphatase synthesis sensor protein PhoR        | COG5002 | T | 428 | 407 | 21   |
| RCA23_c08750 | 934233 | 935270 | putative phosphate binding protein PstS                   | COG0226 | P | 488 | 443 | 45   |
| RCA23_c08760 | 935370 | 936857 | putative phosphate transport system permease protein PstC | COG0573 | P | 413 | 525 | -112 |

|              |        |        |                                                           |         |   |       |     |      |
|--------------|--------|--------|-----------------------------------------------------------|---------|---|-------|-----|------|
| RCA23_c08770 | 936857 | 938185 | putative phosphate transport system permease protein PstA | COG0581 | P | 472   | 478 | -6   |
| RCA23_c08780 | 938190 | 938996 | phosphate import ATP-binding protein PstB                 | COG1117 | P | 497   | 610 | -113 |
| RCA23_c08790 | 939007 | 939699 | phosphate transport system regulatory protein PhoU        | COG0704 | P | 608   | 544 | 64   |
| RCA23_c08800 | 939724 | 940413 | phosphate regulon transl protein PhoB                     | COG0745 | T | 1.061 | 623 | 438  |
| RCA23_c08810 | 940589 | 941791 | putative hippurate hydrolase protei                       | COG1473 | R | 206   | 127 | 79   |
| RCA23_c08820 | 942193 | 942954 | urease accessory protein UreD                             | COG0829 | O | 648   | 456 | 192  |
| RCA23_c08830 | 942958 | 943260 | urease gamma subunit UreA                                 | COG0831 | E | 478   | 528 | -50  |
| RCA23_c08840 | 943270 | 943575 | urease beta subunit UreB                                  | COG0832 | E | 217   | 341 | -124 |
| RCA23_c08850 | 943575 | 945314 | urease alpha subunit UreC                                 | COG0804 | E | 415   | 369 | 46   |
| RCA23_c08860 | 945314 | 945787 | urease accessory protein UreE                             | COG2371 | O | 361   | 376 | -15  |
| RCA23_c08870 | 945957 | 946415 | urease accessory protein UreF                             | COG0830 | O | 517   | 461 | 56   |
| RCA23_c08880 | 946427 | 947074 | urease accessory protein UreG                             | COG0378 | O | 698   | 524 | 174  |
| RCA23_c08890 | 948686 | 947607 | integrase                                                 | COG2801 | L | 0     | 0   | 0    |
| RCA23_c08900 | 948917 | 949201 | hypothetical protein                                      | COG4585 | T | 780   | 501 | 279  |
| RCA23_c08910 | 951070 | 949424 | glucose-methanol-choline oxidoreductase AlkJ              | COG2303 | E | 382   | 383 | -1   |
| RCA23_c08920 | 951279 | 951830 | hypothetical protein, YaeQ family protein                 | COG4681 | S | 731   | 502 | 229  |
| RCA23_c08930 | 953443 | 952526 | hypothetical protein, DUF6 transmembrane protein          | COG0697 | G | 592   | 558 | 34   |
| RCA23_c08940 | 953803 | 954969 | UDP-glucose 6-dehydrogenase Ugd                           | COG1004 | M | 456   | 389 | 67   |
| RCA23_c08950 | 956602 | 955373 | 3-deoxy-D-manno-octulosonic-acid transferase WaaA         | COG1519 | M | 251   | 308 | -57  |
| RCA23_c08960 | 957788 | 956628 | UDP-N-acetylglucosamine 2-epimerase WecB                  | COG0381 | M | 421   | 408 | 13   |
| RCA23_c08970 | 958846 | 957815 | putative N-acetylneuramic acid synthase                   | COG2089 | M | 556   | 454 | 102  |
| RCA23_c08980 | 959840 | 958926 | hypothetical protein                                      |         |   | 595   | 416 | 179  |
| RCA23_c08990 | 960088 | 960732 | hypothetical protein                                      | COG1651 | O | 387   | 414 | -27  |
| RCA23_c09000 | 960843 | 962327 | choline-sulfatase BetC                                    | COG3119 | P | 445   | 476 | -31  |
| RCA23_c09010 | 963713 | 962403 | permease                                                  | COG2233 | F | 269   | 317 | -48  |
| RCA23_c09020 | 964049 | 964585 | hypothetical protein                                      |         |   | 249   | 294 | -45  |
| RCA23_c09030 | 964737 | 965636 | membrane dipeptidase                                      | COG2355 | E | 283   | 328 | -45  |
| RCA23_c09040 | 965633 | 967285 | hypothetical protein                                      |         |   | 232   | 375 | -143 |
| RCA23_c09050 | 967282 | 967791 | hypothetical protein                                      |         |   | 138   | 237 | -99  |
| RCA23_c09060 | 968589 | 967816 | tRNA pseudouridine synthase A                             | COG0101 | J | 255   | 224 | 31   |

|              |         |         |                                                              |         |   |      |     |     |      |
|--------------|---------|---------|--------------------------------------------------------------|---------|---|------|-----|-----|------|
| RCA23_c09070 | 968867  | 970279  | YcjX-like protein                                            | COG3106 | R |      | 270 | 373 | -103 |
| RCA23_c09080 | 970276  | 970722  | hypothetical protein, acetyltransferase-like                 | COG0456 | R |      | 298 | 384 | -86  |
| RCA23_c09090 | 970715  | 971731  | hypothetical protein                                         | COG3768 | S |      | 237 | 411 | -174 |
| RCA23_c09100 | 971937  | 974843  | isoleucyl-tRNA synthase IleS                                 | COG0060 | J |      | 370 | 394 | -24  |
| RCA23_c09110 | 974910  | 975746  | putative integral membrane protein DUF6                      |         |   |      | 282 | 479 | -197 |
| RCA23_c09120 | 976432  | 975743  | phosphatidylcholine synthase Pcs                             | COG1183 | I |      | 316 | 382 | -66  |
| RCA23_c09130 | 977409  | 976468  | putative tyrosine recombinase xerC                           | COG4974 | L |      | 184 | 268 | -84  |
| RCA23_c09140 | 978135  | 977416  | hypothetical protein                                         | COG3159 | S |      | 307 | 263 | 44   |
| RCA23_c09150 | 978835  | 978182  | transaldolase                                                | COG0176 | G |      | 540 | 374 | 166  |
| RCA23_c09160 | 978925  | 981114  | primosomal protein N'                                        | COG1198 | L |      | 227 | 311 | -84  |
| RCA23_c09170 | 983095  | 981122  | methylmalonyl-CoA mutase McmA                                | COG1884 | I |      | 237 | 293 | -56  |
| RCA23_c09180 | 983235  | 984599  | glycerol-3-phosphate acyltransferase PlsB                    | COG2937 | I |      | 324 | 355 | -31  |
| RCA23_c09190 | 984707  | 985993  | crotonyl-CoA reductase Ccr                                   | COG0604 | C |      | 367 | 438 | -71  |
| RCA23_c09200 | 986057  | 987634  | putative ATPase                                              | COG0507 | L |      | 241 | 328 | -87  |
| RCA23_c09210 | 989413  | 987845  | trimethylamine methyltransferase MttB                        | COG5598 | H |      | 191 | 262 | -71  |
| RCA23_c09220 | 989431  | 989895  | hypothetical protein DUF1052                                 | COG5321 | S |      | 188 | 298 | -110 |
| RCA23_c09240 | 990785  | 991279  | hypothetical protein, DUF411                                 | COG3019 | R | GI 4 | 13  | 25  | -12  |
| RCA23_c09250 | 991576  | 991869  | hypothetical protein                                         |         |   | GI 4 | 0   | 0   | 0    |
| RCA23_c09260 | 992104  | 992391  | hypothetical protein                                         |         |   | GI 4 | 5   | 2   | 3    |
| RCA23_c09270 | 993390  | 992584  | MORN repeat                                                  | COG4642 | S | GI 4 | 16  | 14  | 2    |
| RCA23_c09280 | 993934  | 993512  | hypothetical protein                                         | COG3904 | S | GI 4 | 0   | 7   | -7   |
| RCA23_c09290 | 994038  | 995099  | putative DNA-binding protein, transposase-like               | COG3415 | L | GI 4 | 0   | 0   | 0    |
| RCA23_c09300 | 996057  | 995158  | HTH-type transcriptional regulator, LysR family              | COG0583 | K | GI 4 | 4   | 1   | 3    |
| RCA23_c09310 | 996333  | 999947  | protein of unknown function, DUF285/Bacterial Ig-like domain |         |   | GI 4 | 4   | 1   | 3    |
| RCA23_c09320 | 1000260 | 1001186 | Predicted esterase                                           | COG0627 | R | GI 4 | 0   | 0   | 0    |
| RCA23_c09330 | 1002131 | 1001247 | transposase                                                  | COG2801 | L | GI 4 | 28  | 98  | -70  |
| RCA23_c09340 | 1002367 | 1002143 | putative transposase                                         |         |   | GI 4 | 35  | 50  | -15  |
| RCA23_c09350 | 1003498 | 1002938 | hypothetical protein, ornithine cyclodeaminase-like          | COG2423 | E |      | 0   | 1   | -1   |
| RCA23_c09360 | 1004444 | 1003728 | LrgB-like protein                                            | COG1346 | M |      | 289 | 250 | 39   |
| RCA23_c09370 | 1004794 | 1004441 | hypothetical protein                                         | COG1380 | R |      | 347 | 346 | 1    |

|              |         |         |                                                             |         |   |     |     |      |
|--------------|---------|---------|-------------------------------------------------------------|---------|---|-----|-----|------|
| RCA23_c09380 | 1005815 | 1004916 | putative branched-chain-amino-acid aminotransferase IlvE    | COG0115 | E | 518 | 431 | 87   |
| RCA23_c09390 | 1006761 | 1005865 | 2-hydroxy-3-oxopropionate reductase GarR                    | COG2084 | I | 343 | 293 | 50   |
| RCA23_c09400 | 1008113 | 1006908 | bicyclomycin resistance protein Bcr                         | COG2814 | G | 355 | 357 | -2   |
| RCA23_c09410 | 1008660 | 1008187 | hypothetical protein                                        |         |   | 338 | 365 | -27  |
| RCA23_c09420 | 1010198 | 1008657 | hypothetical protein, photolyase                            | COG3046 | R | 441 | 449 | -8   |
| RCA23_c09430 | 1010370 | 1011587 | DNA photolyase, FAD-binding/cryptochrome                    | COG0415 | L | 245 | 277 | -32  |
| RCA23_c09440 | 1011944 | 1012426 | carbon monoxide dehydrogenase small chain CoxS              | COG2080 | C | 366 | 386 | -20  |
| RCA23_c09450 | 1012438 | 1014798 | carbon monoxide dehydrogenase large chain CoxL              | COG1529 | C | 282 | 324 | -42  |
| RCA23_c09460 | 1014811 | 1015602 | carbon monoxide dehydrogenase medium chain CoxM             | COG1319 | C | 294 | 374 | -80  |
| RCA23_c09470 | 1015645 | 1016556 | MoxR-like ATPase                                            | COG0714 | R | 367 | 401 | -34  |
| RCA23_c09480 | 1016556 | 1017776 | CoxE-like protein                                           | COG3552 | R | 237 | 272 | -35  |
| RCA23_c09490 | 1017882 | 1018688 | 5-deoxy-glucuronate isomerase lolB                          | COG3718 | G | 236 | 430 | -194 |
| RCA23_c09500 | 1019039 | 1018707 | branched-chain amino acid transport protein, AzlD-like      | COG4392 | S | 236 | 313 | -77  |
| RCA23_c09510 | 1019743 | 1019036 | branched-chain amino acid transport protein, AzlC-like      | COG1296 | E | 322 | 361 | -39  |
| RCA23_c09520 | 1021462 | 1019804 | alpha-IPM synthase/homocitrate synthase                     | COG0119 | E | 268 | 314 | -46  |
| RCA23_c09530 | 1022656 | 1021499 | cytochrome P450                                             | COG2124 | Q | 179 | 259 | -80  |
| RCA23_c09540 | 1022810 | 1023811 | TRAP dicarboxylate transporter, subunit DctP                | COG1638 | G | 437 | 429 | 8    |
| RCA23_c09550 | 1023966 | 1024568 | TRAP dicarboxylate transporter, subunit DctQ                | COG3090 | G | 573 | 365 | 208  |
| RCA23_c09560 | 1024573 | 1026420 | TRAP dicarboxylate transporter, subunit DctM                | COG1593 | G | 283 | 338 | -55  |
| RCA23_c09570 | 1026486 | 1028369 | putative citrate transporter                                | COG0471 | P | 356 | 376 | -20  |
| RCA23_c09580 | 1029097 | 1028366 | triosephosphate isomerase TpiA                              | COG0149 | G | 264 | 327 | -63  |
| RCA23_c09590 | 1029454 | 1029137 | putative regulator protein of competence-specific genes Tfo | COG3070 | K | 392 | 409 | -17  |
| RCA23_c09600 | 1029816 | 1029451 | hypothetical protein, iron-sulfur cluster assembly protein  | COG0316 | S | 520 | 454 | 66   |
| RCA23_c09610 | 1030445 | 1029936 | hypothetical protein DUF59                                  | COG2151 | R | 242 | 320 | -78  |
| RCA23_c09620 | 1030469 | 1031599 | queuine tRNA-ribosyltransferase Tgt                         | COG0343 | J | 237 | 292 | -55  |
| RCA23_c09630 | 1032099 | 1031611 | hypothetical protein                                        |         |   | 216 | 256 | -40  |
| RCA23_c09640 | 1032374 | 1034782 | ATP-dependent protease La                                   | COG0466 | O | 795 | 491 | 304  |
| RCA23_c09650 | 1034823 | 1035461 | putative phosphoglycerate mutase family protein             | COG0406 | G | 245 | 244 | 1    |
| RCA23_c09670 | 1035777 | 1036430 | protein-L-isoaspartate O-methyltransferase Pcm              | COG2518 | O | 703 | 588 | 115  |
| RCA23_c09680 | 1036466 | 1037830 | outer membrane efflux protein                               | COG1538 | M | 327 | 323 | 4    |



|              |         |         |                                                        |         |   |       |     |      |
|--------------|---------|---------|--------------------------------------------------------|---------|---|-------|-----|------|
| RCA23_c09690 | 1037905 | 1038228 | hypothetical protein                                   |         |   | 190   | 242 | -52  |
| RCA23_c09700 | 1039719 | 1038262 | cobyric acid synthase CobQ                             | COG1492 | H | 274   | 372 | -98  |
| RCA23_c09710 | 1040228 | 1039917 | hypothetical protein                                   |         |   | 1.161 | 530 | 631  |
| RCA23_c09720 | 1040445 | 1041008 | translation elongation factor P                        | COG0231 | J | 447   | 318 | 129  |
| RCA23_c09730 | 1041736 | 1041005 | hypothetical protein tRNA modifying protein YgfZ       | COG0354 | R | 362   | 405 | -43  |
| RCA23_c09740 | 1041797 | 1042474 | putative glycosyltransferase, family 2                 | COG0463 | M | 225   | 395 | -170 |
| RCA23_c09750 | 1044299 | 1042530 | lipid A export ATP-binding/permease protein MsbA       | COG1132 | V | 290   | 354 | -64  |
| RCA23_c09760 | 1044403 | 1045608 | serine--glyoxylate aminotransferase SgaA               | COG0075 | E | 201   | 278 | -77  |
| RCA23_c09770 | 1046719 | 1045610 | histidinol-phosphate aminotransferase HisC             | COG0079 | E | 210   | 281 | -71  |
| RCA23_c09780 | 1049682 | 1046755 | valyl-tRNA synthase ValS                               | COG0525 | J | 332   | 382 | -50  |
| RCA23_c09790 | 1050340 | 1049744 | hypothetical protein, metal-dependent phosphohydrolase | COG4341 | R | 276   | 359 | -83  |
| RCA23_c09800 | 1051209 | 1050337 | putative phytanoyl-CoA dioxygenase family protein      | COG5285 | Q | 412   | 427 | -15  |
| RCA23_c09810 | 1051351 | 1053636 | molybdenum-containing hydroxylase                      | COG1529 | C | 264   | 374 | -110 |
| RCA23_c09820 | 1053643 | 1054722 | hypothetical protein DUF2235                           | COG3673 | S | 304   | 419 | -115 |
| RCA23_c09830 | 1056046 | 1055225 | 5,10-methylenetetrahydrofolate reductase MetF          | COG0685 | E | 229   | 270 | -41  |
| RCA23_c09840 | 1056143 | 1057048 | HTH-type transcriptional regulator MetR                | COG0583 | K | 226   | 312 | -86  |
| RCA23_c09850 | 1057134 | 1057898 | inositol-1-monophosphatase SuhB                        | COG0483 | G | 292   | 283 | 9    |
| RCA23_c09860 | 1057986 | 1058552 | hypothetical protein                                   | COG3063 | N | 278   | 328 | -50  |
| RCA23_c09880 | 1059277 | 1058798 | transcriptional regulator, HxlR family                 | COG1733 | K | 534   | 437 | 97   |
| RCA23_c09890 | 1059447 | 1059785 | hypothetical protein, DUF3764                          |         |   | 523   | 370 | 153  |
| RCA23_c09900 | 1059839 | 1060168 | hypothetical protein                                   |         |   | 293   | 227 | 66   |
| RCA23_c09910 | 1060204 | 1060566 | hypothetical protein, DsrE/F-like                      | COG1553 | P | 359   | 278 | 81   |
| RCA23_c09920 | 1061259 | 1060684 | glutathione peroxidase Gpo                             | COG0386 | O | 225   | 261 | -36  |
| RCA23_c09930 | 1062249 | 1061521 | putative ion channel                                   |         |   | 421   | 440 | -19  |
| RCA23_c09950 | 1063201 | 1062944 | hypothetical protein                                   |         |   | 347   | 292 | 55   |
| RCA23_c09940 | 1063248 | 1064246 | ribosomal large subunit pseudouridine synthase D       | COG0564 | J | 255   | 339 | -84  |
| RCA23_c09960 | 1064374 | 1065270 | RNA polymerase sigma-32 factor RpoH                    | COG0568 | K | 1.034 | 612 | 422  |
| RCA23_c09970 | 1065351 | 1066337 | putative oxidoreductase                                | COG0673 | R | 384   | 351 | 33   |
| RCA23_c09980 | 1068332 | 1066503 | oligoendopeptidase F                                   | COG1164 | E | 339   | 303 | 36   |
| RCA23_c09990 | 1068520 | 1069284 | 2-keto-3-deoxy-L-rhamnonate aldolase RhmA              | COG3836 | G | 273   | 331 | -58  |

|              |         |         |                                                             |         |   |       |     |      |
|--------------|---------|---------|-------------------------------------------------------------|---------|---|-------|-----|------|
| RCA23_c10000 | 1070216 | 1069269 | hypothetical protein, lysophospholipase L2                  | COG2267 | I | 278   | 289 | -11  |
| RCA23_c10010 | 1070506 | 1070216 | putative sterol-binding protein                             | COG3255 | I | 284   | 291 | -7   |
| RCA23_c10020 | 1070580 | 1071140 | hypothetical protein                                        |         |   | 335   | 350 | -15  |
| RCA23_c10030 | 1071160 | 1073967 | ATP-dependent RNA helicase RhIB                             | COG4581 | L | 260   | 318 | -58  |
| RCA23_c10040 | 1074051 | 1074341 | putative heat shock protein                                 | COG1188 | J | 158   | 222 | -64  |
| RCA23_c10050 | 1074410 | 1074748 | ferredoxin FdxA                                             | COG1146 | C | 427   | 421 | 6    |
| RCA23_c10060 | 1074901 | 1075419 | putative transcriptional regulator, CarD family             | COG1329 | K | 344   | 315 | 29   |
| RCA23_c10070 | 1076242 | 1075490 | cobalamin-5-phosphate synthase CobS                         | COG0368 | H | 135   | 170 | -35  |
| RCA23_c10080 | 1076326 | 1077339 | nicotinate-nucleotide--dimethylbenzimidazole phosphoribos   | COG2038 | H | 180   | 268 | -88  |
| RCA23_c10090 | 1079387 | 1077345 | hypothetical protein                                        |         |   | 166   | 262 | -96  |
| RCA23_c10100 | 1079592 | 1080008 | glyoxalase/bleomycin resistance protein                     | COG3565 | R | 433   | 479 | -46  |
| RCA23_c10110 | 1080998 | 1080018 | hypothetical protein                                        |         |   | 392   | 375 | 17   |
| RCA23_c10120 | 1081235 | 1082887 | choline dehydrogenase BetA                                  | COG2303 | E | 290   | 336 | -46  |
| RCA23_c10140 | 1083425 | 1084330 | 23S rRNA (guanosine-2'-O-)-methyltransferase RlmB           | COG0566 | J | 274   | 297 | -23  |
| RCA23_c10150 | 1084647 | 1084342 | phosphoribosyl-ATP pyrophosphatase HisE                     | COG0140 | E | 293   | 375 | -82  |
| RCA23_c10160 | 1085378 | 1084644 | imidazole glycerol phosphate synthase subunit HisF          | COG0107 | E | 188   | 248 | -60  |
| RCA23_c10170 | 1086150 | 1085434 | 1-(5-phosphoribosyl)-5-[(5-phosphoribosylamino)methylid     | COG0106 | E | 179   | 178 | 1    |
| RCA23_c10180 | 1086818 | 1086180 | imidazole glycerol phosphate synthase, glutamine amidotra   | COG0118 | E | 345   | 348 | -3   |
| RCA23_c10190 | 1087410 | 1086823 | imidazoleglycerol-phosphate dehydratase HisB                | COG0131 | E | 327   | 348 | -21  |
| RCA23_c10210 | 1088751 | 1087954 | hypothetical protein, calcineurin-like phosphoesterase-like | COG1409 | R | 418   | 358 | 60   |
| RCA23_c10220 | 1092218 | 1088778 | pyruvate carboxylase Pyc                                    | COG1038 | C | 237   | 292 | -55  |
| RCA23_c10230 | 1093522 | 1092374 | L-lactate dehydrogenase lldD                                | COG1304 | C | 281   | 304 | -23  |
| RCA23_c10240 | 1093655 | 1096048 | putative DNA helicase II                                    | COG0210 | L | 226   | 333 | -107 |
| RCA23_c10250 | 1096133 | 1097425 | gamma-glutamylputrescine oxidoreductase PuuB                | COG0665 | E | 199   | 255 | -56  |
| RCA23_c10260 | 1098046 | 1097444 | putative cysteine/O-acetylserine efflux protein             | COG1280 | E | 283   | 451 | -168 |
| RCA23_c10270 | 1098056 | 1098466 | hypothetical protein                                        |         |   | 1.083 | 672 | 411  |
| RCA23_c10280 | 1098622 | 1099686 | putative protein Mrp                                        | COG0489 | D | 232   | 370 | -138 |
| RCA23_c10290 | 1099713 | 1099967 | hypothetical protein                                        |         |   | 599   | 383 | 216  |
| RCA23_c10300 | 1100315 | 1100818 | hypothetical protein, MraZ                                  | COG2001 | S | 449   | 455 | -6   |
| RCA23_c10310 | 1100821 | 1101810 | S-adenosyl-L-methionine-dependent methyltransferase Mra     | COG0275 | M | 231   | 309 | -78  |

|              |         |         |                                                           |         |   |     |     |      |
|--------------|---------|---------|-----------------------------------------------------------|---------|---|-----|-----|------|
| RCA23_c10320 | 1101807 | 1102151 | hypothetical protein                                      | COG5462 | S | 369 | 361 | 8    |
| RCA23_c10330 | 1102148 | 1103929 | peptidoglycan synthase FtsI                               | COG0768 | M | 297 | 335 | -38  |
| RCA23_c10340 | 1103952 | 1105430 | UDP-N-acetylmuramoyl-L-alanyl-D-glutamate--2,6-diamino    | COG0769 | M | 234 | 338 | -104 |
| RCA23_c10350 | 1105430 | 1106848 | putative UDP-N-acetylmuramoyl-tripeptide--D-alanyl-D-alan | COG0770 | M | 223 | 280 | -57  |
| RCA23_c10360 | 1106866 | 1107948 | phospho-N-acetylmuramoyl-pentapeptide-transferase MraY    | COG0472 | M | 295 | 395 | -100 |
| RCA23_c10370 | 1108005 | 1109384 | UDP-N-acetylmuramoylalanine--D-glutamate ligase MurD      | COG0771 | M | 241 | 377 | -136 |
| RCA23_c10380 | 1109471 | 1110160 | putative glycosyltransferase, sugar binding region        | COG3774 | M | 549 | 438 | 111  |
| RCA23_c10390 | 1110834 | 1110157 | putative galactoside 2-alpha-L-fucosyltransferase 1       |         |   | 675 | 419 | 256  |
| RCA23_c10400 | 1110875 | 1111054 | hypothetical protein                                      |         |   | 439 | 354 | 85   |
| RCA23_c10410 | 1111162 | 1111935 | hypothetical protein                                      | COG3306 | M | 476 | 358 | 118  |
| RCA23_c10420 | 1113153 | 1111963 | hypothetical protein HI0933                               | COG2081 | R | 190 | 222 | -32  |
| RCA23_c10430 | 1113229 | 1114434 | cell division protein FtsW                                | COG0772 | D | 301 | 420 | -119 |
| RCA23_c10440 | 1114424 | 1115530 | UDP-N-acetylglucosamine--N-acetylmuramyl-(pentapeptide    | COG0707 | M | 176 | 275 | -99  |
| RCA23_c10450 | 1115530 | 1116921 | UDP-N-acetylmuramate--L-alanine ligase MurC               | COG0773 | M | 264 | 342 | -78  |
| RCA23_c10460 | 1117803 | 1116925 | permease of the drug/metabolite transporter superfamily   | COG0697 | G | 226 | 272 | -46  |
| RCA23_c10470 | 1117895 | 1118863 | UDP-N-acetylenolpyruvoylglucosamine reductase MurB        | COG0812 | M | 208 | 372 | -164 |
| RCA23_c10480 | 1118953 | 1119843 | D-alanine--D-alanine ligase Ddl                           | COG1181 | M | 235 | 430 | -195 |
| RCA23_c10490 | 1119879 | 1120751 | putative cell division protein FtsQ                       |         |   | 316 | 447 | -131 |
| RCA23_c10500 | 1120748 | 1122082 | cell division protein FtsA                                | COG0849 | D | 275 | 404 | -129 |
| RCA23_c10510 | 1122236 | 1123780 | cell division protein FtsZ                                | COG0206 | D | 341 | 361 | -20  |
| RCA23_c10520 | 1123992 | 1124912 | UDP-3-O-[3-hydroxymyristoyl] N-acetylglucosamine deacet   | COG0774 | M | 325 | 407 | -82  |
| RCA23_c10530 | 1125020 | 1125835 | outer membrane assembly lipoprotein                       | COG4105 | R | 458 | 485 | -27  |
| RCA23_c10540 | 1125852 | 1127504 | DNA repair protein RecN                                   | COG0497 | L | 240 | 362 | -122 |
| RCA23_c10550 | 1127863 | 1127501 | hypothetical protein DUF427                               | COG2343 | S | 394 | 461 | -67  |
| RCA23_c10560 | 1129669 | 1127879 | putative Xaa-Pro aminopeptidase                           | COG0006 | E | 249 | 396 | -147 |
| RCA23_c10570 | 1131630 | 1129756 | aerobic cobaltochelatase subunit CobT                     | COG4547 | H | 258 | 346 | -88  |
| RCA23_c10580 | 1132654 | 1131668 | aerobic cobaltochelatase subunit CobS                     | COG0714 | R | 585 | 452 | 133  |
| RCA23_c10590 | 1133471 | 1132833 | hypothetical protein, DnaJ                                | COG0484 | O | 694 | 495 | 199  |
| RCA23_c10600 | 1133514 | 1133801 | putative stress-induced morphoprotein, BolA type          | COG0271 | T | 335 | 420 | -85  |
| RCA23_c10610 | 1135336 | 1133825 | aspartyl/glutamyl-tRNA(Asn/Gln) amidotransferase subunit  | COG0064 | J | 356 | 465 | -109 |

|              |         |         |                                                      |         |   |      |     |     |      |
|--------------|---------|---------|------------------------------------------------------|---------|---|------|-----|-----|------|
| RCA23_c10620 | 1137977 | 1135425 | aminopeptidase N                                     | COG0308 | E |      | 257 | 346 | -89  |
| RCA23_c10630 | 1138196 | 1140334 | malate synthase GlcB                                 | COG2225 | C |      | 371 | 390 | -19  |
| RCA23_c10640 | 1140396 | 1140824 | hypothetical protein DUF336                          | COG3193 | R |      | 225 | 350 | -125 |
| RCA23_c10650 | 1140906 | 1141109 | hypothetical protein                                 |         |   |      | 218 | 311 | -93  |
| RCA23_c10660 | 1141119 | 1141883 | gamma-glutamyl-gamma-aminobutyrate hydrolase PuuD    | COG2071 | R |      | 209 | 324 | -115 |
| RCA23_c10670 | 1142635 | 1141880 | putative D-beta-hydroxybutyrate dehydrogenase        | COG1028 | I |      | 198 | 280 | -82  |
| RCA23_c10680 | 1142794 | 1144365 | NAD(P) transhydrogenase alpha subunit PntA           | COG3288 | C |      | 325 | 332 | -7   |
| RCA23_c10690 | 1144379 | 1145812 | NAD(P) transhydrogenase beta subunit PntB            | COG1282 | C |      | 435 | 457 | -22  |
| RCA23_c10700 | 1145880 | 1147163 | hypothetical protein                                 | COG4949 | S |      | 357 | 421 | -64  |
| RCA23_c10710 | 1147211 | 1148374 | putative acetylornithine deacetylase ArgE            | COG0624 | E |      | 296 | 398 | -102 |
| RCA23_c10720 | 1149375 | 1148371 | molybdenum cofactor biosynthesis protein MoaA        | COG2896 | H |      | 223 | 295 | -72  |
| RCA23_c10730 | 1149576 | 1151222 | acetyl-coenzyme A synthase AcsA                      | COG0365 | I |      | 196 | 332 | -136 |
| RCA23_c10740 | 1151397 | 1151173 | hypothetical protein                                 | COG4321 | R |      | 261 | 309 | -48  |
| RCA23_c10750 | 1151573 | 1151397 | hypothetical protein                                 |         |   |      | 286 | 384 | -98  |
| RCA23_c10760 | 1152961 | 1151570 | fumarate hydratase class II                          | COG0114 | C |      | 301 | 362 | -61  |
| RCA23_c10770 | 1153500 | 1153036 | hypothetical protein                                 | COG3814 | S |      | 562 | 428 | 134  |
| RCA23_c10780 | 1154840 | 1153572 | putative chromate transport protein                  | COG2059 | P |      | 332 | 384 | -52  |
| RCA23_c10790 | 1155189 | 1157231 | hydantoinase / oxoprolinase family protein           | COG0145 | E |      | 170 | 273 | -103 |
| RCA23_c10800 | 1157331 | 1157729 | hypothetical protein                                 |         |   |      | 647 | 502 | 145  |
| RCA23_c10810 | 1158217 | 1159203 | putative quinone oxidoreductase yhdH                 | COG0604 | C |      | 214 | 264 | -50  |
| RCA23_c10820 | 1159306 | 1160529 | cysteine desulfurase SufS                            | COG0520 | E |      | 246 | 312 | -66  |
| RCA23_c10830 | 1160550 | 1161962 | deoxyribodipyrimidine photo-lyase PhrB               | COG0415 | L |      | 227 | 252 | -25  |
| RCA23_c10840 | 1162037 | 1163245 | cyclopropane-fatty-acyl-phospholipid synthase Cfa    | COG2230 | M |      | 546 | 408 | 138  |
| RCA23_c10850 | 1163253 | 1164371 | ADP-ribose pyrophosphatase NudF                      | COG0494 | L |      | 289 | 351 | -62  |
| RCA23_c10860 | 1164417 | 1165454 | cysteine synthase CysK                               | COG0031 | E |      | 402 | 390 | 12   |
| RCA23_c10870 | 1165441 | 1167759 | mechanosensitive ion channel protein MscS            | COG3264 | M |      | 353 | 377 | -24  |
| RCA23_c10890 | 1168102 | 1169268 | putative phage integrase                             | COG4974 | L | GI 5 | 13  | 11  | 2    |
| RCA23_c10900 | 1173155 | 1169922 | hypothetical protein                                 |         |   | GI 5 | 18  | 15  | 3    |
| RCA23_c10910 | 1173220 | 1175214 | hypothetical protein, tetratricopeptide domain TPR-1 | COG0457 | R | GI 5 | 22  | 11  | 11   |
| RCA23_c10920 | 1177861 | 1176257 | hypothetical protein, resolvase-like                 | COG1961 | L | GI 5 | 799 | 557 | 242  |

|              |         |         |                                                                  |         |   |      |     |     |     |
|--------------|---------|---------|------------------------------------------------------------------|---------|---|------|-----|-----|-----|
| RCA23_c10930 | 1178310 | 1177858 | hypothetical protein, DUF2924                                    |         |   | GI 5 | 237 | 234 | 3   |
| RCA23_c10940 | 1178871 | 1179848 | putative TRAP transporter solute receptor                        | COG2358 | R | GI 5 | 239 | 214 | 25  |
| RCA23_c10950 | 1179941 | 1182292 | TRAP transporter, 4TM/12TM fusion protein                        | COG4666 | R | GI 5 | 386 | 349 | 37  |
| RCA23_c10960 | 1182304 | 1183887 | putative sulfatase YidJ                                          | COG3119 | P | GI 5 | 325 | 398 | -73 |
| RCA23_c10970 | 1183893 | 1184789 | arylsulfatase                                                    | COG1234 | R | GI 5 | 306 | 236 | 70  |
| RCA23_c10980 | 1184804 | 1185622 | siderophore interactin protein, vibriobactin utilization protein | COG2375 | P | GI 5 | 477 | 318 | 159 |
| RCA23_c10990 | 1186917 | 1185640 | hypothetical protein, metallo-beta-lactamase                     | COG2015 | Q | GI 5 | 550 | 453 | 97  |
| RCA23_c11000 | 1187177 | 1188193 | TRAP dicarboxylate transporter, subunit DctP                     | COG1638 | G | GI 5 | 417 | 318 | 99  |
| RCA23_c11010 | 1188369 | 1189034 | glutathione S-transferase                                        | COG0625 | O | GI 5 | 357 | 294 | 63  |
| RCA23_c11020 | 1189053 | 1189601 | TRAP dicarboxylate transporter, subunit DctQ                     | COG3090 | G | GI 5 | 459 | 306 | 153 |
| RCA23_c11030 | 1189598 | 1190959 | TRAP dicarboxylate transporter, subunit DctM                     | COG1593 | G | GI 5 | 284 | 244 | 40  |
| RCA23_c11040 | 1190995 | 1191909 | hypothetical protein, DUF6 transmembrane protein                 | COG0697 | G | GI 5 | 228 | 198 | 30  |
| RCA23_c11050 | 1192027 | 1192302 | ferric reductase like transmembrane component family             |         |   | GI 5 | 221 | 170 | 51  |
| RCA23_c11060 | 1192990 | 1192559 | hypothetical protein                                             |         |   | GI 5 | 458 | 332 | 126 |
| RCA23_c11070 | 1194176 | 1192992 | hypothetical protein                                             |         |   | GI 5 | 378 | 282 | 96  |
| RCA23_c11080 | 1195854 | 1194217 | sulfatase family protein                                         | COG3119 | P | GI 5 | 477 | 324 | 153 |
| RCA23_c11090 | 1196618 | 1195860 | short-chain dehydrogenase/reductase SDR                          | COG1028 | I | GI 5 | 479 | 340 | 139 |
| RCA23_c11100 | 1197395 | 1196637 | maleylacetoacetate isomerase MaiA                                | COG0625 | O | GI 5 | 545 | 391 | 154 |
| RCA23_c11110 | 1198888 | 1197452 | salicylaldehyde dehydrogenase                                    | COG1012 | C | GI 5 | 411 | 357 | 54  |
| RCA23_c11120 | 1199107 | 1199895 | transcriptional regulator, GntR family                           | COG1802 | K | GI 5 | 419 | 355 | 64  |
| RCA23_c11130 | 1200361 | 1200789 | transposase                                                      | COG3316 | L | GI 5 | 2   | 12  | -10 |
| RCA23_c11140 | 1200946 | 1202112 | putative phage integrase                                         | COG4974 | L | GI 5 | 1   | 1   | 0   |
| RCA23_c11150 | 1202483 | 1204498 | hypothetical protein, alginate lyase-lyase                       |         |   | GI 5 | 2   | 3   | -1  |
| RCA23_c11160 | 1205812 | 1205189 | HTH-type transcriptional regulator, GntR family                  | COG1802 | K | GI 5 | 339 | 300 | 39  |
| RCA23_c11170 | 1206137 | 1207324 | branched-chain amino acid ABC transporter, periplasmic su        | COG0683 | E | GI 5 | 438 | 334 | 104 |
| RCA23_c11180 | 1207409 | 1208311 | branched-chain amino acid ABC transporter, permease pro          | COG0559 | E | GI 5 | 327 | 313 | 14  |
| RCA23_c11190 | 1208316 | 1209296 | branched-chain amino acid ABC transporter, permease pro          | COG4177 | E | GI 5 | 497 | 346 | 151 |
| RCA23_c11200 | 1209320 | 1210075 | branched-chain amino acid ABC transporter, ATP-binding p         | COG0411 | E | GI 5 | 414 | 325 | 89  |
| RCA23_c11210 | 1210079 | 1210801 | branched-chain amino acid ABC transporter, ATP-binding p         | COG0410 | E | GI 5 | 408 | 292 | 116 |
| RCA23_c11220 | 1210808 | 1211491 | hydantoin racemase HyuE                                          | COG4126 | E | GI 5 | 395 | 264 | 131 |

|              |         |         |                                                                 |         |   |      |     |     |      |
|--------------|---------|---------|-----------------------------------------------------------------|---------|---|------|-----|-----|------|
| RCA23_c11230 | 1211851 | 1212558 | transposase                                                     | COG3316 | L | GI 5 | 66  | 52  | 14   |
| RCA23_c11240 | 1213785 | 1212979 | glutamine transport ATP-binding protein GlnQ                    | COG1126 | E | GI 5 | 32  | 11  | 21   |
| RCA23_c11250 | 1214500 | 1213802 | putative inner membrane amino-acid ABC transporter perm         | COG0765 | E | GI 5 | 46  | 11  | 35   |
| RCA23_c11260 | 1214805 | 1215512 | transposase                                                     | COG3316 | L | GI 5 | 10  | 6   | 4    |
| RCA23_c11270 | 1216048 | 1217244 | transcriptional regulator CoxC                                  | COG3300 | T | GI 5 | 224 | 150 | 74   |
| RCA23_c11280 | 1217360 | 1218214 | carbon monoxide dehydrogenase medium chain CoxM                 | COG1319 | C | GI 5 | 83  | 69  | 14   |
| RCA23_c11290 | 1218225 | 1218719 | carbon monoxide dehydrogenase small chain CoxS                  | COG2080 | C | GI 5 | 77  | 78  | -1   |
| RCA23_c11300 | 1218716 | 1221142 | carbon monoxide dehydrogenase large chain CoxL                  | COG1529 | C | GI 5 | 130 | 117 | 13   |
| RCA23_c11310 | 1221188 | 1222063 | AAA+ ATPase chaperone CoxD                                      | COG0714 | R | GI 5 | 129 | 129 | 0    |
| RCA23_c11320 | 1222060 | 1223241 | carbon monoxide dehydrogenase accessory protein CoxE            | COG3552 | R | GI 5 | 68  | 81  | -13  |
| RCA23_c11330 | 1223238 | 1224017 | carbon monoxide dehydrogenase accessory protein CoxF            | COG1975 | O | GI 5 | 63  | 69  | -6   |
| RCA23_c11340 | 1224010 | 1224600 | hypothetical protein                                            | COG2068 | R | GI 5 | 75  | 70  | 5    |
| RCA23_c11350 | 1224727 | 1225182 | carbon monoxide dehydrogenase protein CoxG                      | COG3427 | S | GI 5 | 111 | 80  | 31   |
| RCA23_c11360 | 1225187 | 1226101 | carbon monoxide dehydrogenase accessory protein CoxI            | COG1975 | O | GI 5 | 120 | 110 | 10   |
| RCA23_c11370 | 1226311 | 1226796 | transposase                                                     | COG3316 | L | GI 5 | 34  | 32  | 2    |
| RCA23_c11380 | 1227061 | 1227807 | dienelactone hydrolase                                          | COG0412 | Q | GI 5 | 337 | 347 | -10  |
| RCA23_c11390 | 1228850 | 1227804 | aldo/keto reductase                                             | COG0667 | C | GI 5 | 243 | 227 | 16   |
| RCA23_c11400 | 1230223 | 1229126 | mandelate racemase MdlA                                         | COG4948 | M | GI 5 | 299 | 385 | -86  |
| RCA23_c11410 | 1231189 | 1230335 | hypothetical protein DUF1498                                    | COG3822 | R | GI 5 | 363 | 506 | -143 |
| RCA23_c11420 | 1232598 | 1231231 | two-component system, sensor histidine kinase protein           | COG0642 | T | GI 5 | 218 | 328 | -110 |
| RCA23_c11430 | 1233299 | 1232595 | two-component system, response regulator protein                | COG0745 | T | GI 5 | 255 | 357 | -102 |
| RCA23_c11440 | 1233404 | 1234510 | hypothetical protein                                            | COG3181 | S | GI 5 | 441 | 342 | 99   |
| RCA23_c11450 | 1234593 | 1236608 | putative tripartite tricarboxylate transporter (TTT) protein Tc | COG3333 | S | GI 5 | 543 | 448 | 95   |
| RCA23_c11460 | 1236605 | 1237696 | hypothetical protein                                            | COG2828 | S | GI 5 | 288 | 325 | -37  |
| RCA23_c11470 | 1237724 | 1238692 | D-isomer specific 2-hydroxyacid dehydrogenase                   | COG0111 | H | GI 5 | 297 | 421 | -124 |
| RCA23_c11480 | 1239793 | 1238756 | putative ammonia monooxygenase                                  | COG3180 | R | GI 5 | 263 | 351 | -88  |
| RCA23_c11490 | 1240440 | 1239790 | transcriptional regulator                                       | COG1802 | K | GI 5 | 194 | 307 | -113 |
| RCA23_c11500 | 1240489 | 1241970 | fumarate reductase flavoprotein subunit FccA                    | COG1053 | C | GI 5 | 282 | 318 | -36  |
| RCA23_c11510 | 1242188 | 1243363 | aspartate aminotransferase AspC                                 | COG0436 | E | GI 5 | 321 | 400 | -79  |
| RCA23_c11520 | 1244165 | 1243431 | hypothetical protein                                            |         |   | GI 5 | 269 | 385 | -116 |

|              |         |         |                                                                 |         |   |      |     |     |      |
|--------------|---------|---------|-----------------------------------------------------------------|---------|---|------|-----|-----|------|
| RCA23_c11530 | 1244807 | 1244235 | aerobic glycerol-3-phosphate dehydrogenase GlpD                 | COG0578 | C | GI 5 | 198 | 314 | -116 |
| RCA23_c11540 | 1245824 | 1244865 | aerobic glycerol-3-phosphate dehydrogenase GlpD                 | COG0578 | C | GI 5 | 239 | 288 | -49  |
| RCA23_c11550 | 1247291 | 1247935 | hypothetical protein                                            | COG1192 | D | GI 5 | 29  | 30  | -1   |
| RCA23_c11560 | 1247928 | 1249136 | chemotaxis protein CheW                                         | COG0835 | N | GI 5 | 27  | 26  | 1    |
| RCA23_c11570 | 1249188 | 1251065 | methyl-accepting chemotaxis protein II                          | COG0840 | N | GI 5 | 62  | 37  | 25   |
| RCA23_c11580 | 1251091 | 1254051 | chemotaxis histidine kinase CheA                                | COG0643 | N | GI 5 | 40  | 20  | 20   |
| RCA23_c11590 | 1254048 | 1256066 | response regulator CheY                                         | COG2114 | T | GI 5 | 36  | 14  | 22   |
| RCA23_c11600 | 1256078 | 1256908 | chemotaxis protein methyltransferase CheR                       | COG1352 | N | GI 5 | 0   | 6   | -6   |
| RCA23_c11610 | 1256889 | 1257911 | chemotaxis response regulator protein-glutamate methylest       | COG2201 | N | GI 5 | 13  | 11  | 2    |
| RCA23_c11620 | 1258541 | 1259149 | metal-dependent hydrolase                                       | COG1235 | R | GI 5 | 125 | 59  | 66   |
| RCA23_c11630 | 1260667 | 1259588 | integrase                                                       | COG2801 | L | GI 5 | 0   | 0   | 0    |
| RCA23_c11640 | 1261553 | 1260729 | methyltransferase, FkbM family                                  |         |   | GI 5 | 13  | 25  | -12  |
| RCA23_c11650 | 1262611 | 1261847 | hypothetical protein, sugar transferase-like                    |         |   | GI 5 | 33  | 35  | -2   |
| RCA23_c11660 | 1263686 | 1262811 | aldo/keto reductase                                             | COG0667 | C | GI 5 | 35  | 36  | -1   |
| RCA23_c11670 | 1264642 | 1264917 | hypothetical protein                                            |         |   | GI 5 | 44  | 45  | -1   |
| RCA23_c11680 | 1265571 | 1265173 | hypothetical protein                                            | COG0790 | R | GI 5 | 13  | 13  | 0    |
| RCA23_c11690 | 1266818 | 1266246 | hypothetical protein                                            | COG4430 | S | GI 5 | 255 | 166 | 89   |
| RCA23_c11700 | 1267451 | 1268101 | hypothetical protein                                            | COG2755 | E | GI 5 | 0   | 0   | 0    |
| RCA23_c11710 | 1268699 | 1269586 | phytanoyl-CoA dioxygenase family protein                        | COG5285 | Q | GI 5 | 343 | 209 | 134  |
| RCA23_c11720 | 1270243 | 1270815 | putative bacterial extracellular solute binding protein, family | COG1791 | S | GI 5 | 67  | 79  | -12  |
| RCA23_c11730 | 1271031 | 1271468 | hypothetical protein                                            |         |   | GI 5 | 73  | 29  | 44   |
| RCA23_c11740 | 1272798 | 1272199 | SOUL heme-binding protein                                       |         |   | GI 5 | 321 | 247 | 74   |
| RCA23_c11750 | 1273478 | 1274995 | arylsulfatase precursor                                         | COG3119 | P | GI 5 | 113 | 132 | -19  |
| RCA23_c11760 | 1275232 | 1275627 | hypothetical protein DUF583                                     |         |   | GI 5 | 7   | 10  | -3   |
| RCA23_c11770 | 1275804 | 1276883 | integrase                                                       | COG2801 | L | GI 5 | 0   | 0   | 0    |
| RCA23_c11780 | 1277985 | 1276918 | hypothetical protein                                            | COG3616 | E | GI 5 | 368 | 281 | 87   |
| RCA23_c11790 | 1279810 | 1278509 | glutamine synthase GlnA type I                                  | COG0174 | E | GI 5 | 3   | 7   | -4   |
| RCA23_c11800 | 1280652 | 1279807 | putative HTH-type transcriptional regulator, RpiR family        | COG1737 | K | GI 5 | 11  | 5   | 6    |
| RCA23_c11810 | 1280733 | 1281500 | N-formylglutamate amidohydrolase                                | COG3931 | E | GI 5 | 9   | 7   | 2    |
| RCA23_c11820 | 1281497 | 1282138 | putative isochorismatase family protein                         | COG1335 | Q | GI 5 | 5   | 11  | -6   |

|              |         |         |                                                           |         |   |      |     |     |     |
|--------------|---------|---------|-----------------------------------------------------------|---------|---|------|-----|-----|-----|
| RCA23_c11830 | 1282131 | 1282853 | branched-chain amino acid ABC transporter, ATP-binding p  | COG0411 | E | GI 5 | 7   | 1   | 6   |
| RCA23_c11840 | 1282882 | 1284033 | branched-chain amino acid ABC transporter, periplasmic bi | COG0683 | E | GI 5 | 10  | 5   | 5   |
| RCA23_c11850 | 1284085 | 1284783 | branched-chain amino acid ABC transporter, ATP-binding p  | COG0410 | E | GI 5 | 4   | 1   | 3   |
| RCA23_c11860 | 1284783 | 1285679 | branched-chain amino acid ABC transporter, permease pro   | COG0559 | E | GI 5 | 7   | 4   | 3   |
| RCA23_c11870 | 1285754 | 1286698 | branched-chain amino acid ABC transporter, permease pro   | COG4177 | E | GI 5 | 15  | 7   | 8   |
| RCA23_c11880 | 1286708 | 1287646 | acetamidase/formamidase family protein                    | COG2421 | C | GI 5 | 1   | 6   | -5  |
| RCA23_c11890 | 1288192 | 1288902 | hypothetical protein                                      | COG1028 | I | GI 5 | 468 | 321 | 147 |
| RCA23_c11910 | 1289550 | 1290728 | putative prophage integrase                               | COG0582 | L | GI 5 | 13  | 8   | 5   |
| RCA23_c11920 | 1290725 | 1291072 | hypothetical protein                                      |         |   | GI 5 | 16  | 9   | 7   |
| RCA23_c11930 | 1291427 | 1292068 | hypothetical protein                                      |         |   | GI 5 | 79  | 49  | 30  |
| RCA23_c11940 | 1292185 | 1293384 | putative AAA ATPase                                       | COG3598 | L | GI 5 | 82  | 62  | 20  |
| RCA23_c11950 | 1294040 | 1293531 | hypothetical protein                                      |         |   | GI 5 | 4   | 3   | 1   |
| RCA23_c11960 | 1294894 | 1294163 | hypothetical protein                                      |         |   | GI 5 | 16  | 4   | 12  |
| RCA23_c11970 | 1295139 | 1295579 | hypothetical protein                                      |         |   | GI 5 | 76  | 54  | 22  |
| RCA23_c11980 | 1295579 | 1295947 | hypothetical protein                                      |         |   | GI 5 | 33  | 14  | 19  |
| RCA23_c11990 | 1296908 | 1296210 | branched-chain amino acid ABC transporter, ATP-binding p  | COG0410 | E | GI 5 | 45  | 35  | 10  |
| RCA23_c12000 | 1297654 | 1296914 | branched-chain amino acid ABC transporter, ATP-binding p  | COG0411 | E | GI 5 | 45  | 36  | 9   |
| RCA23_c12010 | 1298634 | 1297651 | branched-chain amino acid ABC transporter, permease pro   | COG4177 | E | GI 5 | 76  | 71  | 5   |
| RCA23_c12020 | 1299559 | 1298666 | branched-chain amino acid ABC transporter, permease pro   | COG0559 | E | GI 5 | 66  | 89  | -23 |
| RCA23_c12030 | 1300733 | 1299567 | branched-chain amino acid ABC transporter, periplasmic bi | COG0683 | E | GI 5 | 53  | 48  | 5   |
| RCA23_c12040 | 1301568 | 1300768 | enoyl-CoA hydratase/carnithine racemase                   | COG1024 | I | GI 5 | 36  | 56  | -20 |
| RCA23_c12050 | 1303130 | 1301586 | acetyl-CoA synthase-like protein                          | COG0318 | I | GI 5 | 55  | 58  | -3  |
| RCA23_c12060 | 1303632 | 1303123 | dehydrogenase iron-sulfur-binding subunit                 | COG2080 | C | GI 5 | 49  | 59  | -10 |
| RCA23_c12070 | 1304444 | 1303620 | dehydrogenase FAD-binding subunit                         | COG1319 | C | GI 5 | 26  | 41  | -15 |
| RCA23_c12080 | 1307380 | 1304441 | dehydrogenase molybdenum-binding subunit                  | COG1529 | C | GI 5 | 41  | 48  | -7  |
| RCA23_c12090 | 1308419 | 1307487 | putative HTH-type transcriptional regulator, AraC family  | COG2207 | K | GI 5 | 71  | 67  | 4   |
| RCA23_c12100 | 1310095 | 1309085 | periplasmic binding protein-like                          | COG1879 | G | GI 5 | 18  | 16  | 2   |
| RCA23_c12110 | 1311473 | 1310106 | ROK family transcriptional repressor                      | COG1940 | K | GI 5 | 9   | 11  | -2  |
| RCA23_c12120 | 1311642 | 1312454 | xylose isomerase                                          | COG1082 | G | GI 5 | 8   | 13  | -5  |
| RCA23_c12130 | 1312504 | 1313622 | sugar ABC transporter, periplasmic binding protein        | COG1879 | G | GI 5 | 11  | 9   | 2   |



|              |         |         |                                                                          |         |   |      |     |     |     |
|--------------|---------|---------|--------------------------------------------------------------------------|---------|---|------|-----|-----|-----|
| RCA23_c12140 | 1313694 | 1314857 | putative oxidoreductase                                                  | COG0673 | R | GI 5 | 11  | 16  | -5  |
| RCA23_c12150 | 1314857 | 1316431 | sugar ABC transporter, ATP-binding protein                               | COG1129 | G | GI 5 | 11  | 11  | 0   |
| RCA23_c12160 | 1316418 | 1317386 | sugar ABC transporter, permease protein                                  | COG1172 | G | GI 5 | 12  | 24  | -12 |
| RCA23_c12170 | 1317389 | 1317691 | hypothetical protein, monooxygenase-like                                 | COG1359 | S | GI 5 | 18  | 23  | -5  |
| RCA23_c12180 | 1317805 | 1318863 | hypothetical protein                                                     | COG1082 | G | GI 5 | 30  | 18  | 12  |
| RCA23_c12190 | 1318867 | 1320018 | putative oxidoreductase                                                  | COG0673 | R | GI 5 | 29  | 25  | 4   |
| RCA23_c12200 | 1320689 | 1321837 | peptidase M20D, amidohydrolase                                           | COG1473 | R | GI 5 | 229 | 226 | 3   |
| RCA23_c12210 | 1321840 | 1322985 | X-Pro dipeptidase                                                        | COG0006 | E | GI 5 | 289 | 228 | 61  |
| RCA23_c12220 | 1324296 | 1323853 | hypothetical protein                                                     |         |   | GI 5 | 18  | 9   | 9   |
| RCA23_c12230 | 1325069 | 1324293 | hypothetical protein, transmembrane                                      |         |   | GI 5 | 12  | 12  | 0   |
| RCA23_c12240 | 1325832 | 1327037 | hypothetical protein, DNA breaking rejoining enzymes family protein-like |         |   | GI 5 | 37  | 26  | 11  |
| RCA23_c12250 | 1327137 | 1328645 | hypothetical protein                                                     |         |   | GI 5 | 1   | 0   | 1   |
| RCA23_c12260 | 1328729 | 1329205 | hypothetical protein                                                     |         |   | GI 5 | 10  | 5   | 5   |
| RCA23_c12270 | 1329553 | 1329744 | hypothetical protein                                                     |         |   | GI 5 | 0   | 13  | -13 |
| RCA23_c12280 | 1330088 | 1331644 | type I restriction-modification system, M subunit                        | COG0286 | V | GI 5 | 10  | 4   | 6   |
| RCA23_c12290 | 1331637 | 1332842 | type I restriction-modification system, S subunit                        | COG0732 | V | GI 5 | 8   | 2   | 6   |
| RCA23_c12300 | 1332842 | 1335937 | type I restriction-modification system, R subunit                        | COG0610 | V | GI 5 | 0   | 4   | -4  |
| RCA23_c12310 | 1336026 | 1337000 | hypothetical protein                                                     | COG3012 | S | GI 5 | 0   | 0   | 0   |
| RCA23_c12320 | 1337142 | 1338152 | hypothetical protein                                                     | COG2865 | K | GI 5 | 0   | 0   | 0   |
| RCA23_c12330 | 1338762 | 1338241 | hypothetical protein                                                     |         |   | GI 5 | 0   | 0   | 0   |
| RCA23_c12340 | 1340773 | 1338905 | hypothetical protein, DNA helicase-like protein                          |         |   | GI 5 | 2   | 0   | 2   |
| RCA23_c12350 | 1340970 | 1341416 | hypothetical protein                                                     |         |   | GI 5 | 0   | 0   | 0   |
| RCA23_c12360 | 1341557 | 1342156 | integrase                                                                | COG0582 | L | GI 5 | 0   | 1   | -1  |
| RCA23_c12370 | 1342597 | 1342181 | hypothetical protein                                                     |         |   | GI 5 | 0   | 0   | 0   |
| RCA23_c12380 | 1343211 | 1342702 | hypothetical protein                                                     |         |   | GI 5 | 0   | 0   | 0   |
| RCA23_c12390 | 1343382 | 1344026 | hypothetical protein                                                     |         |   | GI 5 | 9   | 2   | 7   |
| RCA23_c12400 | 1344489 | 1344037 | hypothetical protein                                                     |         |   | GI 5 | 2   | 1   | 1   |
| RCA23_c12410 | 1346190 | 1345639 | hypothetical protein, DUF1994                                            |         |   | GI 5 | 386 | 183 | 203 |
| RCA23_c12420 | 1347575 | 1346172 | exonuclease I                                                            | COG2925 | L | GI 5 | 154 | 111 | 43  |
| RCA23_c12430 | 1349548 | 1347575 | transpeptidase, penicillin binding protein                               | COG4953 | M | GI 5 | 127 | 64  | 63  |

|              |         |         |                                                           |         |   |      |     |     |      |
|--------------|---------|---------|-----------------------------------------------------------|---------|---|------|-----|-----|------|
| RCA23_c12440 | 1354560 | 1349545 | hypothetical protein                                      | COG2373 | R | GI 5 | 122 | 64  | 58   |
| RCA23_c12450 | 1355067 | 1354687 | hypothetical protein                                      |         |   | GI 5 | 63  | 63  | 0    |
| RCA23_c12460 | 1355322 | 1355774 | hypothetical protein                                      |         |   | GI 5 | 12  | 9   | 3    |
| RCA23_c12470 | 1357492 | 1355828 | type III restriction enzyme, res subunit                  | COG1061 | K | GI 5 | 36  | 25  | 11   |
| RCA23_c12480 | 1358034 | 1357498 | putative type III restriction system protein, mod subunit |         |   | GI 5 | 25  | 14  | 11   |
| RCA23_c12490 | 1358097 | 1359374 | putative serine/threonine protein kinase                  | COG0515 | R | GI 5 | 10  | 16  | -6   |
| RCA23_c12500 | 1359362 | 1360081 | serine/threonine protein phosphatase PrpC                 | COG0631 | T | GI 5 | 12  | 14  | -2   |
| RCA23_c12510 | 1362272 | 1360134 | DNA helicase, UvrD/REP type                               | COG0210 | L | GI 5 | 6   | 6   | 0    |
| RCA23_c12520 | 1362274 | 1364124 | hypothetical protein                                      | COG1463 | Q | GI 5 | 4   | 4   | 0    |
| RCA23_c12530 | 1364121 | 1365416 | hypothetical protein, OmpA/MotB-like                      | COG1360 | N | GI 5 | 1   | 2   | -1   |
| RCA23_c12540 | 1365416 | 1367443 | hypothetical protein                                      |         |   | GI 5 | 2   | 1   | 1    |
| RCA23_c12550 | 1367457 | 1370579 | ATP-dependent helicase                                    | COG0553 | K | GI 5 | 5   | 5   | 0    |
| RCA23_c12560 | 1371410 | 1370973 | hypothetical protein                                      |         |   | GI 5 | 7   | 3   | 4    |
| RCA23_c12570 | 1372098 | 1371616 | hypothetical protein                                      |         |   | GI 5 | 11  | 7   | 4    |
| RCA23_c12580 | 1372594 | 1372277 | hypothetical protein                                      |         |   | GI 5 | 4   | 4   | 0    |
| RCA23_c12590 | 1372881 | 1373252 | hypothetical protein                                      |         |   | GI 5 | 14  | 2   | 12   |
| RCA23_c12600 | 1373306 | 1374205 | hypothetical protein                                      |         |   | GI 5 | 9   | 5   | 4    |
| RCA23_c12610 | 1374516 | 1374866 | hypothetical protein                                      |         |   | GI 5 | 0   | 0   | 0    |
| RCA23_c12620 | 1374971 | 1375435 | hypothetical protein                                      |         |   | GI 5 | 0   | 0   | 0    |
| RCA23_c12630 | 1375674 | 1376117 | integrase                                                 | COG2801 | L | GI 5 | 376 | 216 | 160  |
| RCA23_c12640 | 1377304 | 1376135 | hypothetical protein                                      |         |   | GI 5 | 2   | 0   | 2    |
| RCA23_c12650 | 1377893 | 1377396 | hypothetical protein                                      |         |   | GI 5 | 0   | 0   | 0    |
| RCA23_c12660 | 1378200 | 1377955 | DNA integration/recombination/inversion protein           |         |   | GI 5 | 0   | 21  | -21  |
| RCA23_c12690 | 1379769 | 1378858 | putative beta-lactamase-like protein                      | COG0491 | R |      | 250 | 305 | -55  |
| RCA23_c12680 | 1379768 | 1381060 | osmolarity sensor protein EnvZ                            | COG0642 | T |      | 253 | 396 | -143 |
| RCA23_c12700 | 1381130 | 1381954 | hypothetical protein                                      |         |   |      | 591 | 515 | 76   |
| RCA23_c12710 | 1382060 | 1382731 | 50S ribosomal protein L21                                 | COG0261 | J |      | 514 | 314 | 200  |
| RCA23_c12720 | 1382738 | 1383007 | 50S ribosomal protein L27                                 | COG0211 | J |      | 403 | 469 | -66  |
| RCA23_c12730 | 1383092 | 1383730 | hypothetical protein, LysE type translocator              | COG1280 | E |      | 245 | 351 | -106 |
| RCA23_c12740 | 1383727 | 1384263 | putative acetyltransferase                                | COG1670 | J |      | 321 | 372 | -51  |

|              |         |         |                                                      |         |   |      |     |     |      |
|--------------|---------|---------|------------------------------------------------------|---------|---|------|-----|-----|------|
| RCA23_c12750 | 1384267 | 1384815 | GCN5-like N-acetyltransferase                        | COG1670 | J |      | 202 | 299 | -97  |
| RCA23_c12760 | 1384812 | 1385840 | GTP-binding protein Obg                              | COG0536 | R |      | 389 | 466 | -77  |
| RCA23_c12770 | 1385828 | 1386934 | glutamate 5-kinase ProB                              | COG0263 | E |      | 322 | 395 | -73  |
| RCA23_c12780 | 1386950 | 1388206 | gamma-glutamyl phosphate reductase ProA              | COG0014 | E |      | 246 | 337 | -91  |
| RCA23_c12800 | 1388851 | 1388243 | hypothetical protein                                 | COG5385 | S |      | 346 | 369 | -23  |
| RCA23_c12790 | 1388850 | 1389026 | hypothetical protein                                 |         |   |      | 186 | 377 | -191 |
| RCA23_c12810 | 1389099 | 1389872 | hypothetical protein                                 | COG3176 | R |      | 184 | 338 | -154 |
| RCA23_c12820 | 1389890 | 1390708 | putative phosphate acyltransferase                   | COG0204 | I |      | 235 | 353 | -118 |
| RCA23_c12830 | 1391398 | 1390754 | thiamine-phosphate pyrophosphorylase ThiE            | COG0352 | H |      | 312 | 391 | -79  |
| RCA23_c12840 | 1391480 | 1392226 | tRNA (cytidine/uridine-2'-O-)-methyltransferase TrmJ | COG0565 | J |      | 302 | 372 | -70  |
| RCA23_c12850 | 1392274 | 1393416 | heme A synthase CtaA                                 | COG1612 | O |      | 363 | 447 | -84  |
| RCA23_c12860 | 1393413 | 1394894 | thermostable carboxypeptidase 1                      | COG2317 | E |      | 450 | 426 | 24   |
| RCA23_c12870 | 1398094 | 1395344 | DNA gyrase subunit A                                 | COG0188 | L |      | 289 | 359 | -70  |
| RCA23_c12880 | 1399028 | 1398543 | hypothetical protein                                 | COG1495 | O |      | 189 | 308 | -119 |
| RCA23_c12890 | 1399603 | 1399025 | DedA family protein                                  | COG1238 | S |      | 295 | 288 | 7    |
| RCA23_c12900 | 1400438 | 1399839 | hypothetical protein                                 |         |   | GI 6 | 458 | 361 | 97   |
| RCA23_c12910 | 1401810 | 1401337 | putative snoaL-like polyketide cyclase               | COG3631 | R | GI 6 | 222 | 195 | 27   |
| RCA23_c12920 | 1402164 | 1402454 | hypothetical protein, DUF1330                        | COG5470 | S | GI 6 | 264 | 216 | 48   |
| RCA23_c12930 | 1402883 | 1403188 | hypothetical protein, DUF3303                        |         |   | GI 6 | 110 | 73  | 37   |
| RCA23_c12940 | 1403986 | 1403495 | hypothetical protein, transmembrane                  |         |   | GI 6 | 27  | 27  | 0    |
| RCA23_c12950 | 1404278 | 1403991 | hypothetical protein, transmembrane                  |         |   | GI 6 | 11  | 14  | -3   |
| RCA23_c12960 | 1404422 | 1405501 | integrase                                            | COG2801 | L | GI 6 | 0   | 0   | 0    |
| RCA23_c12970 | 1406068 | 1406265 | hypothetical protein                                 |         |   | GI 6 | 0   | 0   | 0    |
| RCA23_c12980 | 1406863 | 1406288 | site-specific recombinase, resolvase family protein  | COG1961 | L | GI 6 | 149 | 119 | 30   |
| RCA23_c12990 | 1407072 | 1407455 | hypothetical protein                                 | COG4731 | S | GI 6 | 437 | 256 | 181  |
| RCA23_c13000 | 1407781 | 1407981 | hypothetical protein                                 |         |   | GI 6 | 17  | 6   | 11   |
| RCA23_c13010 | 1409183 | 1408122 | transposase                                          | COG3415 | L | GI 6 | 0   | 0   | 0    |
| RCA23_c13020 | 1410237 | 1410437 | ribosomal protein S21                                | COG0828 | J | GI 6 | 301 | 250 | 51   |
| RCA23_c13030 | 1410572 | 1410739 | hypothetical protein                                 |         |   | GI 6 | 484 | 243 | 241  |
| RCA23_c13040 | 1410794 | 1411873 | integrase                                            | COG2801 | L | GI 6 | 0   | 0   | 0    |

|              |         |         |                                                               |         |   |      |     |     |      |
|--------------|---------|---------|---------------------------------------------------------------|---------|---|------|-----|-----|------|
| RCA23_c13050 | 1413278 | 1411980 | hypothetical protein                                          |         |   | GI 6 | 524 | 297 | 227  |
| RCA23_c13060 | 1414337 | 1413294 | putative phage integrase                                      | COG0582 | L | GI 6 | 476 | 307 | 169  |
| RCA23_c13080 | 1414822 | 1415982 | putative phage integrase                                      | COG0582 | L | GI 6 | 243 | 165 | 78   |
| RCA23_c13090 | 1417647 | 1417237 | hypothetical protein, GYD domain                              | COG4274 | S | GI 6 | 33  | 42  | -9   |
| RCA23_c13100 | 1417942 | 1418304 | hypothetical protein                                          |         |   | GI 6 | 4   | 0   | 4    |
| RCA23_c13110 | 1418856 | 1418572 | hypothetical protein                                          |         |   | GI 6 | 224 | 134 | 90   |
| RCA23_c13120 | 1419178 | 1420584 | hypothetical protein                                          |         |   | GI 6 | 92  | 69  | 23   |
| RCA23_c13130 | 1420645 | 1421724 | integrase                                                     | COG2801 | L | GI 6 | 0   | 0   | 0    |
| RCA23_c13140 | 1422270 | 1422037 | hypothetical protein                                          | COG5586 | S | GI 6 | 138 | 77  | 61   |
| RCA23_c13150 | 1422868 | 1422398 | hypothetical protein                                          |         |   | GI 6 | 83  | 93  | -10  |
| RCA23_c13160 | 1423763 | 1423269 | hypothetical protein                                          |         |   | GI 6 | 217 | 204 | 13   |
| RCA23_c13170 | 1424625 | 1424954 | hypothetical protein                                          | COG4274 | S | GI 6 | 458 | 401 | 57   |
| RCA23_c13180 | 1425131 | 1425541 | hypothetical protein                                          |         |   | GI 6 | 484 | 312 | 172  |
| RCA23_c13190 | 1425553 | 1425708 | hypothetical protein                                          |         |   | GI 6 | 314 | 205 | 109  |
| RCA23_c13210 | 1425849 | 1426889 | phosphoribosylformylglycinamide cyclo-ligase PurM             | COG0150 | F |      | 228 | 287 | -59  |
| RCA23_c13220 | 1426886 | 1427464 | phosphoribosylglycinamide formyltransferase PurN              | COG0299 | F |      | 356 | 390 | -34  |
| RCA23_c13230 | 1427543 | 1428700 | ribonuclease D                                                | COG0349 | J |      | 533 | 523 | 10   |
| RCA23_c13240 | 1428736 | 1429146 | SufE-like protein                                             | COG2166 | R |      | 396 | 545 | -149 |
| RCA23_c13250 | 1429745 | 1429143 | hypothetical protein                                          |         |   |      | 328 | 397 | -69  |
| RCA23_c13260 | 1430578 | 1429871 | putative methionine synthase (B12 dependent) subunit 2        | COG5012 | R |      | 318 | 404 | -86  |
| RCA23_c13270 | 1431745 | 1430717 | putative methionine synthase (B12 dependent) subunit 1        | COG0646 | E |      | 255 | 293 | -38  |
| RCA23_c13280 | 1431913 | 1432788 | phosphoribosylaminoimidazole-succinocarboxamide synthase      | COG0152 | F |      | 544 | 497 | 47   |
| RCA23_c13290 | 1432805 | 1433035 | phosphoribosylformylglycinamide (FGAM) synthase PurS          | COG1828 | F |      | 429 | 477 | -48  |
| RCA23_c13300 | 1433035 | 1433703 | phosphoribosylformylglycinamide synthase PurQ                 | COG0047 | F |      | 256 | 362 | -106 |
| RCA23_c13310 | 1433749 | 1435512 | C4-dicarboxylate transport sensor protein DctB                | COG4191 | T |      | 424 | 436 | -12  |
| RCA23_c13320 | 1435515 | 1436849 | C4-dicarboxylate transport transcriptional regulatory protein | COG2204 | T |      | 309 | 329 | -20  |
| RCA23_c13330 | 1437325 | 1440108 | ribonuclease E                                                | COG1530 | J |      | 255 | 309 | -54  |
| RCA23_c13340 | 1440411 | 1440178 | putative sulfurtransferase tusA                               | COG0425 | O |      | 247 | 389 | -142 |
| RCA23_c13350 | 1440615 | 1441367 | cytochrome C biogenesis protein transmembrane region          | COG0785 | O |      | 246 | 383 | -137 |
| RCA23_c13360 | 1441476 | 1442669 | hypothetical protein                                          |         |   |      | 167 | 250 | -83  |

|              |         |         |                                                         |         |   |     |     |      |
|--------------|---------|---------|---------------------------------------------------------|---------|---|-----|-----|------|
| RCA23_c13370 | 1442666 | 1444039 | putative cytochrome P450                                | COG2124 | Q | 149 | 243 | -94  |
| RCA23_c13380 | 1444734 | 1444045 | DNA alkylation repair enzyme                            | COG4912 | L | 200 | 224 | -24  |
| RCA23_c13390 | 1445375 | 1444875 | hypothetical protein                                    | COG3153 | R | 535 | 551 | -16  |
| RCA23_c13400 | 1447484 | 1445661 | glucosamine--fructose-6-phosphate aminotransferase GlmS | COG0449 | M | 266 | 262 | 4    |
| RCA23_c13410 | 1448847 | 1447489 | bifunctional protein GlmU                               | COG1207 | M | 241 | 239 | 2    |
| RCA23_c13420 | 1448966 | 1449634 | putative HAD-superfamily hydrolase                      | COG0546 | R | 158 | 222 | -64  |
| RCA23_c13440 | 1450935 | 1449619 | MmgE/PrpD family protein                                | COG2079 | R | 213 | 307 | -94  |
| RCA23_c13430 | 1450926 | 1452245 | putative pyridoxal-phosphate-dependent aminotransferase | COG0399 | M | 302 | 360 | -58  |
| RCA23_c13450 | 1452356 | 1453519 | isovaleryl-CoA dehydrogenase                            | COG1960 | I | 393 | 399 | -6   |
| RCA23_c13460 | 1453516 | 1454001 | hypothetical protein                                    |         |   | 340 | 392 | -52  |
| RCA23_c13470 | 1454014 | 1455594 | methylcrotonoyl-CoA carboxylase beta subunit MccB       | COG4799 | I | 176 | 239 | -63  |
| RCA23_c13480 | 1455563 | 1456069 | hypothetical protein                                    |         |   | 283 | 455 | -172 |
| RCA23_c13490 | 1456066 | 1457997 | methylcrotonoyl-CoA carboxylase alpha subunit MccA      | COG4770 | I | 216 | 303 | -87  |
| RCA23_c13500 | 1457994 | 1458887 | hydroxymethylglutaryl-CoA lyase MvaB                    | COG0119 | E | 169 | 249 | -80  |
| RCA23_c13510 | 1458877 | 1459662 | putative methylglutaconyl-CoA hydratase                 | COG1024 | I | 202 | 268 | -66  |
| RCA23_c13520 | 1459788 | 1460153 | NADH-quinone oxidoreductase subunit A                   | COG0838 | C | 661 | 586 | 75   |
| RCA23_c13530 | 1460153 | 1460677 | NADH-quinone oxidoreductase subunit NuoB                | COG0377 | C | 486 | 555 | -69  |
| RCA23_c13540 | 1460682 | 1460888 | hypothetical protein DUF2158                            | COG5475 | S | 652 | 610 | 42   |
| RCA23_c13550 | 1460885 | 1461496 | NADH-quinone oxidoreductase subunit C                   | COG0852 | C | 607 | 461 | 146  |
| RCA23_c13560 | 1461557 | 1462396 | hypothetical protein                                    |         |   | 533 | 476 | 57   |
| RCA23_c13570 | 1462446 | 1463657 | NADH-quinone oxidoreductase subunit D                   | COG0649 | C | 551 | 526 | 25   |
| RCA23_c13580 | 1463723 | 1464529 | NADH-quinone oxidoreductase subunit E                   | COG1905 | C | 409 | 436 | -27  |
| RCA23_c13590 | 1464577 | 1464804 | hypothetical protein                                    |         |   | 413 | 373 | 40   |
| RCA23_c13600 | 1464810 | 1466105 | NADH-quinone oxidoreductase subunit F                   | COG1894 | C | 469 | 416 | 53   |
| RCA23_c13610 | 1466139 | 1466543 | hypothetical protein                                    |         |   | 322 | 392 | -70  |
| RCA23_c13620 | 1466546 | 1468564 | NADH-quinone oxidoreductase subunit G                   | COG1034 | C | 305 | 351 | -46  |
| RCA23_c13630 | 1468569 | 1468826 | hypothetical protein                                    |         |   | 466 | 384 | 82   |
| RCA23_c13640 | 1468823 | 1469860 | NADH-quinone oxidoreductase subunit H                   | COG1005 | C | 757 | 586 | 171  |
| RCA23_c13650 | 1469865 | 1470359 | NADH-quinone oxidoreductase subunit I                   | COG1143 | C | 602 | 413 | 189  |
| RCA23_c13660 | 1470382 | 1470987 | NADH-quinone oxidoreductase subunit J                   | COG0839 | C | 636 | 482 | 154  |

|              |         |         |                                                  |         |   |     |     |      |
|--------------|---------|---------|--------------------------------------------------|---------|---|-----|-----|------|
| RCA23_c13670 | 1470984 | 1471289 | NADH-quinone oxidoreductase subunit K            | COG0713 | C | 821 | 637 | 184  |
| RCA23_c13680 | 1471296 | 1473413 | NADH-quinone oxidoreductase subunit L            | COG1009 | C | 437 | 408 | 29   |
| RCA23_c13690 | 1473413 | 1474963 | NADH-quinone oxidoreductase subunit M            | COG1008 | C | 532 | 545 | -13  |
| RCA23_c13700 | 1474980 | 1476422 | NADH-quinone oxidoreductase subunit N            | COG1007 | C | 401 | 459 | -58  |
| RCA23_c13710 | 1476424 | 1477155 | biotin-[acetyl-CoA-carboxylase] ligase           | COG0340 | H | 229 | 269 | -40  |
| RCA23_c13720 | 1477167 | 1477937 | type III pantothenate kinase CoaX                | COG1521 | K | 366 | 445 | -79  |
| RCA23_c13730 | 1477937 | 1479601 | putative ribonuclease                            | COG0595 | R | 374 | 437 | -63  |
| RCA23_c13740 | 1481465 | 1479801 | ATP-dependent RNA helicase RhlE                  | COG0513 | L | 354 | 399 | -45  |
| RCA23_c13750 | 1483232 | 1481634 | peptide chain release factor 3                   | COG4108 | J | 313 | 275 | 38   |
| RCA23_c13760 | 1484260 | 1483316 | hypothetical protein                             |         |   | 571 | 437 | 134  |
| RCA23_c13770 | 1484470 | 1485249 | putative short chain dehydrogenase               | COG1028 | I | 262 | 331 | -69  |
| RCA23_c13780 | 1485369 | 1486409 | arsenite methyltransferase                       | COG2226 | H | 400 | 459 | -59  |
| RCA23_c13790 | 1486465 | 1487541 | Fe(3+) ions import ATP-binding protein FbpC      | COG3842 | E | 250 | 357 | -107 |
| RCA23_c13800 | 1488367 | 1487555 | putative helix-turn-helix protein                | COG2378 | K | 292 | 291 | 1    |
| RCA23_c13810 | 1488388 | 1488582 | sec-independent protein translocase protein TatA | COG1826 | U | 505 | 457 | 48   |
| RCA23_c13820 | 1488618 | 1489190 | sec-independent protein translocase protein TatB | COG1826 | U | 330 | 343 | -13  |
| RCA23_c13830 | 1489187 | 1490077 | sec-independent protein translocase protein TatC | COG0805 | U | 517 | 496 | 21   |
| RCA23_c13840 | 1490074 | 1490913 | hypothetical protein DUF815                      | COG2607 | R | 258 | 376 | -118 |
| RCA23_c13850 | 1492065 | 1490932 | putative peptidoglycan-binding peptidase         | COG0739 | M | 224 | 279 | -55  |
| RCA23_c13860 | 1492751 | 1492104 | protein-L-isoaspartate O-methyltransferase Pcm   | COG2518 | O | 271 | 340 | -69  |
| RCA23_c13870 | 1493504 | 1492755 | 5'-nucleotidase SurE                             | COG0496 | R | 249 | 361 | -112 |
| RCA23_c13880 | 1494293 | 1493628 | putative short chain dehydrogenase               | COG1028 | I | 171 | 181 | -10  |
| RCA23_c13890 | 1495797 | 1494328 | amidophosphoribosyltransferase PurF              | COG0034 | F | 308 | 326 | -18  |
| RCA23_c13900 | 1496469 | 1495963 | putative colicin V production protein            |         |   | 695 | 461 | 234  |
| RCA23_c13910 | 1497899 | 1496541 | DNA repair protein RadA                          | COG1066 | O | 241 | 276 | -35  |
| RCA23_c13920 | 1498723 | 1497977 | ABC transporter ATP-binding protein              | COG1127 | Q | 240 | 329 | -89  |
| RCA23_c13930 | 1499508 | 1498720 | hypothetical protein DUF140                      | COG0767 | Q | 233 | 367 | -134 |
| RCA23_c13940 | 1500548 | 1499505 | alanine racemase, biosynthetic                   | COG0787 | M | 293 | 329 | -36  |
| RCA23_c13950 | 1502120 | 1500630 | replicative DNA helicase DnaB                    | COG0305 | L | 362 | 394 | -32  |
| RCA23_c13960 | 1503031 | 1502354 | orotate phosphoribosyltransferase PyrE           | COG0461 | F | 442 | 359 | 83   |

|              |         |         |                                                            |         |   |      |       |     |       |
|--------------|---------|---------|------------------------------------------------------------|---------|---|------|-------|-----|-------|
| RCA23_c13970 | 1504098 | 1503058 | dihydroorotase PyrC                                        | COG0418 | F |      | 202   | 251 | -49   |
| RCA23_c13980 | 1504207 | 1504548 | hypothetical protein                                       |         |   |      | 487   | 337 | 150   |
| RCA23_c13990 | 1504659 | 1504880 | hypothetical protein                                       |         |   |      | 1.964 | 903 | 1.061 |
| RCA23_c14000 | 1505732 | 1504914 | hypothetical protein                                       |         |   |      | 387   | 351 | 36    |
| RCA23_c14010 | 1507107 | 1506076 | malate dehydrogenase Mdh                                   | COG0039 | C |      | 211   | 210 | 1     |
| RCA23_c14020 | 1507213 | 1508112 | citrate lyase beta subunit CitE                            | COG2301 | G |      | 312   | 379 | -67   |
| RCA23_c14030 | 1508312 | 1509337 | putative mesaconyl-CoA hydratase                           | COG2030 | I |      | 265   | 408 | -143  |
| RCA23_c14040 | 1509578 | 1509898 | succinate dehydrogenase cytochrome b556 subunit SdhC       | COG2009 | C |      | 557   | 392 | 165   |
| RCA23_c14050 | 1509911 | 1510282 | succinate dehydrogenase hydrophobic membrane anchor s      | COG2142 | C |      | 433   | 353 | 80    |
| RCA23_c14060 | 1510301 | 1512106 | succinate dehydrogenase flavoprotein subunit SdhA          | COG1053 | C |      | 278   | 316 | -38   |
| RCA23_c14070 | 1512106 | 1512408 | hypothetical protein                                       |         |   |      | 327   | 285 | 42    |
| RCA23_c14080 | 1512506 | 1513285 | succinate dehydrogenase iron-sulfur subunit SdhB           | COG0479 | C |      | 697   | 511 | 186   |
| RCA23_c14090 | 1514072 | 1513368 | purine nucleoside phosphorylase deoD-type                  | COG0813 | F |      | 306   | 402 | -96   |
| RCA23_c14100 | 1514517 | 1514077 | acetyltransferase                                          | COG1246 | E |      | 267   | 373 | -106  |
| RCA23_c14110 | 1515360 | 1514536 | tryptophan synthase alpha chain TrpA                       | COG0159 | E |      | 426   | 401 | 25    |
| RCA23_c14120 | 1515506 | 1516603 | GTP-dependent nucleic acid-binding protein EngD            | COG0012 | J |      | 325   | 304 | 21    |
| RCA23_c14130 | 1516647 | 1517570 | Non-specific ribonucleoside hydrolase rihC                 | COG1957 | F |      | 193   | 264 | -71   |
| RCA23_c14150 | 1518098 | 1518574 | hypothetical protein DUF583                                | COG1664 | M | GI 7 | 165   | 88  | 77    |
| RCA23_c14160 | 1519456 | 1518554 | protease HtpX                                              | COG0501 | O | GI 7 | 279   | 171 | 108   |
| RCA23_c14170 | 1521395 | 1520490 | histone deacetylase                                        | COG0123 | B | GI 7 | 75    | 50  | 25    |
| RCA23_c14180 | 1521466 | 1521981 | peripheral-type benzodiazepine receptor/signal transductor | COG3476 | T | GI 7 | 102   | 83  | 19    |
| RCA23_c14190 | 1522156 | 1522710 | DNA-invertase Hin                                          | COG1961 | L | GI 7 | 122   | 64  | 58    |
| RCA23_c14200 | 1523534 | 1524067 | hypothetical protein                                       |         |   | GI 7 | 24    | 29  | -5    |
| RCA23_c14210 | 1524259 | 1524588 | hypothetical protein                                       |         |   | GI 7 | 272   | 263 | 9     |
| RCA23_c14220 | 1526125 | 1525748 | hypothetical protein, RmlC-like cupin family               | COG3450 | R | GI 7 | 126   | 63  | 63    |
| RCA23_c14230 | 1527629 | 1526337 | integrase                                                  | COG4974 | L | GI 7 | 158   | 126 | 32    |
| RCA23_c14240 | 1528430 | 1529155 | hypothetical membrane protein                              |         |   | GI 7 | 498   | 284 | 214   |
| RCA23_c14260 | 1530033 | 1529710 | hypothetical protein                                       | COG4530 | S |      | 830   | 585 | 245   |
| RCA23_c14270 | 1530131 | 1530841 | hypothetical protein DUF45                                 | COG1451 | R |      | 190   | 223 | -33   |
| RCA23_c14280 | 1530914 | 1531564 | HTH-type transcriptional regulator, GntR family            | COG1802 | K |      | 187   | 228 | -41   |

|              |         |         |                                                             |         |   |     |     |      |
|--------------|---------|---------|-------------------------------------------------------------|---------|---|-----|-----|------|
| RCA23_c14290 | 1533239 | 1531851 | dihydrolipoyl dehydrogenase Lpd                             | COG1249 | C | 466 | 368 | 98   |
| RCA23_c14300 | 1534890 | 1533394 | dihydrolipoyllysine-residue succinyltransferase component c | COG0508 | C | 303 | 288 | 15   |
| RCA23_c14310 | 1537852 | 1534895 | 2-oxoglutarate dehydrogenase E1 component SucA              | COG0567 | C | 473 | 404 | 69   |
| RCA23_c14320 | 1538893 | 1538009 | succinyl-CoA ligase [ADP-forming] alpha subunit SucD        | COG0074 | C | 358 | 285 | 73   |
| RCA23_c14330 | 1540169 | 1538973 | succinyl-CoA ligase [ADP-forming] beta subunit SucC         | COG0045 | C | 690 | 360 | 330  |
| RCA23_c14340 | 1541555 | 1540356 | butyryl-CoA dehydrogenase                                   | COG1960 | I | 341 | 300 | 41   |
| RCA23_c14350 | 1542165 | 1541704 | translation initiation factor IF-3                          | COG0290 | J | 630 | 362 | 268  |
| RCA23_c14360 | 1543174 | 1542341 | ferredoxin--NADP reductase Fpr                              | COG1018 | C | 336 | 418 | -82  |
| RCA23_c14370 | 1543641 | 1543234 | hypothetical protein                                        | COG3749 | S | 253 | 220 | 33   |
| RCA23_c14380 | 1543877 | 1543641 | cysH'                                                       | COG0175 | E | 232 | 182 | 50   |
| RCA23_c14390 | 1545545 | 1543881 | cysI/sir: sulfite reductase (ferredoxin)                    | COG0155 | P | 294 | 400 | -106 |
| RCA23_c14400 | 1545843 | 1545547 | hypothetical protein                                        |         |   | 228 | 310 | -82  |
| RCA23_c14410 | 1547228 | 1545834 | siroheme synthase CysG                                      | COG0007 | H | 185 | 248 | -63  |
| RCA23_c14420 | 1547360 | 1547827 | HTH-type transcriptional regulator, AsnC family             | COG1522 | K | 378 | 390 | -12  |
| RCA23_c14450 | 1549602 | 1548220 | peptidase                                                   | COG0624 | E | 247 | 316 | -69  |
| RCA23_c14460 | 1549872 | 1551119 | hypothetical protein                                        | COG1426 | S | 263 | 283 | -20  |
| RCA23_c14470 | 1551156 | 1552289 | 4-hydroxy-3-methylbut-2-en-1-yl diphosphate synthase IspC   | COG0821 | I | 231 | 303 | -72  |
| RCA23_c14480 | 1553599 | 1552286 | TPR-repeat containing protein                               | COG4783 | R | 216 | 239 | -23  |
| RCA23_c14490 | 1553648 | 1554796 | aspartate aminotransferase                                  | COG0436 | E | 243 | 353 | -110 |
| RCA23_c14500 | 1554989 | 1557526 | penicillin-binding protein 1A                               | COG5009 | M | 262 | 302 | -40  |
| RCA23_c14510 | 1557611 | 1558735 | peptide chain release factor 2                              | COG1186 | J | 431 | 474 | -43  |
| RCA23_c14520 | 1559286 | 1558798 | hypothetical protein DUF583                                 | COG1664 | M | 284 | 384 | -100 |
| RCA23_c14530 | 1560550 | 1559276 | putative peptidase, M23 family                              | COG0739 | M | 336 | 341 | -5   |
| RCA23_c14540 | 1561570 | 1560740 | hypothetical protein DUF455                                 | COG2833 | S | 240 | 368 | -128 |
| RCA23_c14550 | 1562037 | 1561567 | peroxiredoxin Bcp                                           | COG1225 | O | 290 | 273 | 17   |
| RCA23_c14560 | 1562118 | 1565399 | hypothetical protein                                        |         |   | 277 | 331 | -54  |
| RCA23_c14570 | 1565470 | 1566519 | S-adenosylmethionine:tRNA ribosyltransferase-isomerase C    | COG0809 | J | 222 | 302 | -80  |
| RCA23_c14580 | 1566591 | 1567847 | MFS-type transporter                                        |         |   | 516 | 456 | 60   |
| RCA23_c14590 | 1567922 | 1568500 | hypothetical protein DUF924                                 | COG3803 | S | 230 | 272 | -42  |
| RCA23_c14600 | 1568608 | 1570005 | dihydrolipoyl dehydrogenase Lpd                             | COG1249 | C | 446 | 363 | 83   |



|              |         |         |                                                                     |         |   |     |     |      |
|--------------|---------|---------|---------------------------------------------------------------------|---------|---|-----|-----|------|
| RCA23_c14610 | 1570379 | 1573255 | uvrABC system protein A                                             | COG0178 | L | 350 | 381 | -31  |
| RCA23_c14620 | 1574577 | 1573252 | MmgE/PrpD family protein                                            | COG2079 | R | 259 | 359 | -100 |
| RCA23_c14630 | 1575459 | 1574587 | 3-hydroxyisobutyrate dehydrogenase MmsB                             | COG2084 | I | 182 | 158 | 24   |
| RCA23_c14640 | 1576498 | 1575461 | 3-hydroxyisobutyryl-CoA hydrolase                                   | COG1024 | I | 249 | 295 | -46  |
| RCA23_c14650 | 1577670 | 1576495 | isobutyryl-CoA dehydrogenase                                        | COG1960 | I | 231 | 285 | -54  |
| RCA23_c14660 | 1579264 | 1577765 | methylmalonate-semialdehyde dehydrogenase MmsA                      | COG1012 | C | 289 | 334 | -45  |
| RCA23_c14670 | 1579359 | 1580273 | putative HTH-type transcriptional regulator, LysR family            | COG0583 | K | 195 | 319 | -124 |
| RCA23_c14680 | 1580359 | 1580856 | phosphopantetheine adenylyltransferase CoaD                         | COG0669 | H | 397 | 393 | 4    |
| RCA23_c14690 | 1581884 | 1580877 | glyceraldehyde-3-phosphate dehydrogenase Gap                        | COG0057 | G | 443 | 402 | 41   |
| RCA23_c14700 | 1583056 | 1582103 | glyceraldehyde-3-phosphate dehydrogenase Gap                        | COG0057 | G | 317 | 344 | -27  |
| RCA23_c14710 | 1585311 | 1583296 | transketolase TktA                                                  | COG0021 | G | 257 | 307 | -50  |
| RCA23_c14720 | 1585511 | 1585894 | hypothetical protein                                                |         |   | 236 | 322 | -86  |
| RCA23_c14730 | 1585887 | 1586291 | cell division protein ZapA                                          | COG3027 | S | 366 | 260 | 106  |
| RCA23_c14740 | 1586719 | 1586354 | putative glutaredoxin                                               | COG0278 | O | 643 | 378 | 265  |
| RCA23_c14750 | 1586969 | 1586709 | hypothetical protein                                                |         |   | 556 | 382 | 174  |
| RCA23_c14760 | 1587213 | 1586971 | hypothetical protein, BolA-like                                     | COG0271 | T | 488 | 401 | 87   |
| RCA23_c14770 | 1589513 | 1587267 | phosphoribosylformylglycinamide synthase PurL                       | COG0046 | F | 254 | 340 | -86  |
| RCA23_c14780 | 1590634 | 1589726 | HTH-type transcriptional regulator, LysR family                     | COG0583 | K | 322 | 383 | -61  |
| RCA23_c14790 | 1590763 | 1594146 | hypothetical protein, pyruvate ferredoxin/ferredoxin oxidoreductase | COG4231 | C | 194 | 266 | -72  |
| RCA23_c14800 | 1594236 | 1595048 | glutamate racemase Murl                                             | COG0796 | M | 356 | 334 | 22   |
| RCA23_c14810 | 1595120 | 1596148 | N-acetyl-gamma-glutamyl-phosphate reductase ArgC                    | COG0002 | E | 564 | 441 | 123  |
| RCA23_c14820 | 1596148 | 1596600 | cytochrome c-type biogenesis protein CcmE                           | COG2332 | O | 291 | 279 | 12   |
| RCA23_c14830 | 1596707 | 1598668 | cytochrome c-type biogenesis protein CcmF                           | COG1138 | O | 404 | 410 | -6   |
| RCA23_c14840 | 1598722 | 1599117 | cytochrome c-type biogenesis protein CcmH                           | COG3088 | O | 315 | 462 | -147 |
| RCA23_c14850 | 1599159 | 1599935 | putative enoyl-CoA hydratase FadB                                   | COG1024 | I | 285 | 353 | -68  |
| RCA23_c14860 | 1600258 | 1600728 | hypothetical protein                                                |         |   | 544 | 317 | 227  |
| RCA23_c14870 | 1602134 | 1600809 | citrate synthase GltA                                               | COG0372 | C | 642 | 370 | 272  |
| RCA23_c14880 | 1603561 | 1602152 | glutamyl-tRNA synthase 2                                            | COG0008 | J | 390 | 320 | 70   |
| RCA23_c14890 | 1603619 | 1605670 | hypothetical protein competence protein E                           | COG0658 | R | 263 | 389 | -126 |
| RCA23_c14900 | 1606374 | 1605667 | LexA repressor                                                      | COG1974 | K | 337 | 368 | -31  |

|              |         |         |                                                            |         |   |     |     |      |
|--------------|---------|---------|------------------------------------------------------------|---------|---|-----|-----|------|
| RCA23_c14910 | 1607624 | 1606449 | molybdopterin biosynthesis protein MoeA                    | COG0303 | H | 152 | 180 | -28  |
| RCA23_c14920 | 1608103 | 1607621 | molybdenum cofactor biosynthesis protein MoaC              | COG0315 | H | 261 | 210 | 51   |
| RCA23_c14930 | 1608916 | 1608104 | indole-3-glycerol phosphate synthase TrpC                  | COG0134 | E | 180 | 257 | -77  |
| RCA23_c14940 | 1609952 | 1608933 | anthranilate phosphoribosyltransferase TrpD                | COG0547 | E | 184 | 199 | -15  |
| RCA23_c14950 | 1610530 | 1609949 | anthranilate synthase component TrpG                       | COG0512 | E | 229 | 330 | -101 |
| RCA23_c14960 | 1610679 | 1611788 | hypothetical protein, divergent polysaccharide deacetylase |         |   | 278 | 342 | -64  |
| RCA23_c14970 | 1612782 | 1611811 | hypothetical protein                                       |         |   | 318 | 371 | -53  |
| RCA23_c14990 | 1613796 | 1613200 | hypothetical protein                                       | COG3108 | S | 294 | 342 | -48  |
| RCA23_c15000 | 1614095 | 1615693 | putative L,D-transpeptidase YcbB                           | COG2989 | S | 337 | 409 | -72  |
| RCA23_c15010 | 1615723 | 1616820 | UDP-3-O-[3-hydroxymyristoyl] glucosamine N-acyltransferase | COG1044 | M | 307 | 313 | -6   |
| RCA23_c15020 | 1616840 | 1617097 | acyl carrier protein                                       | COG0236 | I | 752 | 635 | 117  |
| RCA23_c15030 | 1617101 | 1618309 | 3-oxoacyl-[acyl-carrier-protein] synthase FabF             | COG0304 | I | 360 | 368 | -8   |
| RCA23_c15040 | 1618913 | 1618323 | hypothetical protein, invasion protein B                   | COG5342 | R | 470 | 365 | 105  |
| RCA23_c15050 | 1620585 | 1619287 | inner membrane protein                                     | COG4536 | P | 535 | 395 | 140  |
| RCA23_c15060 | 1621505 | 1620585 | tyrosine recombinase XerD                                  | COG4974 | L | 356 | 425 | -69  |
| RCA23_c15070 | 1622956 | 1621502 | hypothetical protein                                       |         |   | 267 | 381 | -114 |
| RCA23_c15080 | 1623167 | 1622958 | hypothetical protein                                       |         |   | 401 | 504 | -103 |
| RCA23_c15090 | 1623212 | 1623763 | shikimate kinase AroK                                      | COG0703 | E | 556 | 623 | -67  |
| RCA23_c15100 | 1623760 | 1624878 | 3-dehydroquinate synthase AroB                             | COG0337 | E | 227 | 392 | -165 |
| RCA23_c15110 | 1625462 | 1624944 | single-stranded DNA-binding protein                        | COG0629 | L | 285 | 427 | -142 |
| RCA23_c15120 | 1627772 | 1625688 | glutathione import ATP-binding protein GsiA                | COG0444 | E | 341 | 366 | -25  |
| RCA23_c15130 | 1629378 | 1627777 | putative ABC transporter inner membrane component          | COG1173 | E | 271 | 317 | -46  |
| RCA23_c15140 | 1630432 | 1629392 | putative ABC transporter permease protein                  | COG0601 | E | 407 | 407 | 0    |
| RCA23_c15150 | 1632178 | 1630532 | ABC transporter extracellular solute-binding protein       | COG0747 | E | 250 | 204 | 46   |
| RCA23_c15160 | 1633423 | 1632533 | tRNA delta(2)-isopentenylpyrophosphate transferase MiaA    | COG0324 | J | 194 | 325 | -131 |
| RCA23_c15170 | 1633522 | 1634253 | uridylate kinase PyrH                                      | COG0528 | F | 352 | 335 | 17   |
| RCA23_c15180 | 1634275 | 1634841 | ribosome recycling factor Frr                              | COG0233 | J | 393 | 363 | 30   |
| RCA23_c15190 | 1634856 | 1635563 | undecaprenyl pyrophosphate synthase UppS                   | COG0020 | I | 318 | 350 | -32  |
| RCA23_c15200 | 1635560 | 1636345 | putative cytidylyltransferase                              | COG0575 | I | 183 | 309 | -126 |
| RCA23_c15210 | 1636345 | 1637505 | 1-deoxy-D-xylulose 5-phosphate reductoisomerase Dxr        | COG0743 | I | 155 | 311 | -156 |

|              |         |         |                                                              |         |   |     |     |      |
|--------------|---------|---------|--------------------------------------------------------------|---------|---|-----|-----|------|
| RCA23_c15220 | 1637498 | 1638829 | RIP metalloprotease RseP                                     | COG0750 | M | 293 | 380 | -87  |
| RCA23_c15230 | 1638949 | 1641297 | putative outer membrane assembly factor                      | COG4775 | M | 444 | 390 | 54   |
| RCA23_c15240 | 1641399 | 1641863 | putative outer tein                                          |         |   | 412 | 324 | 88   |
| RCA23_c15250 | 1641972 | 1642433 | (3R)-hydroxymyristoyl-[acyl-carrier-protein] dehydratase Fal | COG0764 | I | 326 | 374 | -48  |
| RCA23_c15260 | 1642430 | 1643227 | acyl-[acyl-carrier-protein]-UDP-N-acetylglucosamine O-acy    | COG1043 | M | 283 | 369 | -86  |
| RCA23_c15270 | 1643232 | 1644035 | hypothetical protein DUF1009                                 | COG3494 | S | 199 | 315 | -116 |
| RCA23_c15280 | 1644032 | 1645186 | lipid-A-disaccharide synthase LpxB                           | COG0763 | M | 225 | 289 | -64  |
| RCA23_c15290 | 1646325 | 1645189 | tRNA (5-methylaminomethyl-2-thiouridylate)-methyltransfer:   | COG0482 | J | 270 | 301 | -31  |
| RCA23_c15300 | 1646437 | 1646721 | hypothetical protein                                         |         |   | 191 | 235 | -44  |
| RCA23_c15310 | 1646802 | 1647515 | cell cycle transcriptional regulator                         | COG0745 | T | 662 | 573 | 89   |
| RCA23_c15320 | 1647766 | 1649886 | DNA ligase LigA                                              | COG0272 | L | 331 | 351 | -20  |
| RCA23_c15330 | 1649883 | 1651973 | ATP-dependent DNA helicase RecG                              | COG1200 | L | 233 | 326 | -93  |
| RCA23_c15340 | 1653286 | 1652261 | hypothetical protein                                         |         |   | 341 | 418 | -77  |
| RCA23_c15350 | 1653842 | 1653390 | hypothetical protein                                         | COG0822 | C | 206 | 275 | -69  |
| RCA23_c15360 | 1653910 | 1654266 | phosphoribosyl-AMP cyclohydrolase HisI                       | COG0139 | E | 288 | 223 | 65   |
| RCA23_c15370 | 1655153 | 1654284 | glutamyl-Q tRNA(Asp) synthase GluQ                           | COG0008 | J | 175 | 221 | -46  |
| RCA23_c15380 | 1655731 | 1655150 | hypothetical protein, methyltransferase                      | COG4976 | R | 245 | 288 | -43  |
| RCA23_c15390 | 1657149 | 1655812 | tRNA uridine 5-carboxymethylaminomethyl modification enz     | COG1206 | J | 217 | 276 | -59  |
| RCA23_c15400 | 1657978 | 1657190 | putative crotonase                                           | COG1024 | I | 321 | 314 | 7    |
| RCA23_c15410 | 1658033 | 1658455 | putative thioesterase                                        | COG2050 | Q | 219 | 259 | -40  |
| RCA23_c15420 | 1658600 | 1659058 | 50S ribosomal protein L13                                    | COG0102 | J | 681 | 369 | 312  |
| RCA23_c15430 | 1659062 | 1659550 | 30S ribosomal protein S9                                     | COG0103 | J | 324 | 197 | 127  |
| RCA23_c15440 | 1659763 | 1661193 | integrase                                                    |         |   | 1   | 0   | 1    |
| RCA23_c15460 | 1663623 | 1661959 | choline dehydrogenase BetA                                   | COG2303 | E | 197 | 307 | -110 |
| RCA23_c15470 | 1663885 | 1664619 | ABC transporter, permease protein                            | COG4662 | H | 250 | 357 | -107 |
| RCA23_c15480 | 1664613 | 1665329 | ABC transporter, ATP-binding protein                         | COG1131 | V | 208 | 301 | -93  |
| RCA23_c15490 | 1665326 | 1666123 | ABC transporter, periplasmic substrate-binding protein       | COG2998 | H | 273 | 269 | 4    |
| RCA23_c15500 | 1666130 | 1666561 | hypothetical membrane protein                                | COG1238 | S | 257 | 388 | -131 |
| RCA23_c15510 | 1666576 | 1667487 | hypothetical protein DUF6 family, transmembrane              | COG2962 | R | 263 | 325 | -62  |
| RCA23_c15520 | 1668078 | 1667497 | hypothetical protein                                         | COG2068 | R | 284 | 389 | -105 |

|              |         |         |                                                            |         |   |     |     |      |
|--------------|---------|---------|------------------------------------------------------------|---------|---|-----|-----|------|
| RCA23_c15530 | 1670501 | 1668111 | dimethylglycine dehydrogenase                              | COG0404 | E | 282 | 264 | 18   |
| RCA23_c15540 | 1670705 | 1673146 | dimethylglycine dehydrogenase                              | COG0404 | E | 272 | 341 | -69  |
| RCA23_c15550 | 1674027 | 1673149 | short-chain dehydrogenase/reductase SDR                    | COG1028 | I | 334 | 424 | -90  |
| RCA23_c15560 | 1674074 | 1674460 | hypothetical transmembrane protein                         | COG3788 | R | 458 | 440 | 18   |
| RCA23_c15570 | 1675087 | 1674470 | hypothetical protein, tetR regulator                       | COG1309 | K | 206 | 240 | -34  |
| RCA23_c15580 | 1676054 | 1675137 | homoserine O-succinyltransferase MetA                      | COG1897 | E | 361 | 398 | -37  |
| RCA23_c15590 | 1676950 | 1676060 | hypothetical protein                                       |         |   | 409 | 301 | 108  |
| RCA23_c15600 | 1677863 | 1677015 | putative integral membrane protein                         | COG2510 | S | 444 | 337 | 107  |
| RCA23_c15610 | 1678994 | 1678410 | Gcn5-like N-acetyltransferase                              | COG1670 | J | 276 | 171 | 105  |
| RCA23_c15620 | 1681717 | 1680161 | GMP synthase GuaA                                          | COG0519 | F | 282 | 260 | 22   |
| RCA23_c15630 | 1681941 | 1683413 | trimethylamine methyltransferase MttB                      | COG5598 | H | 243 | 240 | 3    |
| RCA23_c15640 | 1683982 | 1684989 | hypothetical protein                                       |         |   | 313 | 290 | 23   |
| RCA23_c15650 | 1685077 | 1686024 | lipoyl synthase LipA                                       | COG0320 | H | 597 | 400 | 197  |
| RCA23_c15660 | 1686218 | 1686039 | hypothetical protein                                       |         |   | 488 | 401 | 87   |
| RCA23_c15670 | 1686751 | 1686215 | hypoxanthine phosphoribosyltransferase Hpt                 | COG0634 | F | 754 | 569 | 185  |
| RCA23_c15680 | 1686817 | 1687272 | hypothetical protein                                       | COG2867 | I | 446 | 375 | 71   |
| RCA23_c15690 | 1688506 | 1687319 | ammonium transporter AmtB                                  | COG0004 | P | 357 | 340 | 17   |
| RCA23_c15700 | 1689126 | 1688647 | putative competence-damaged protein                        | COG1546 | R | 144 | 266 | -122 |
| RCA23_c15710 | 1689584 | 1689123 | phosphatidylglycerophosphatase A                           | COG1267 | I | 217 | 316 | -99  |
| RCA23_c15720 | 1690723 | 1689581 | 2-C-methyl-D-erythritol 2,4-cyclodiphosphate synthase IspF | COG0245 | I | 197 | 251 | -54  |
| RCA23_c15730 | 1690934 | 1691875 | tRNA-dihydrouridine synthase B                             | COG0042 | J | 294 | 356 | -62  |
| RCA23_c15740 | 1691872 | 1692936 | histidine kinase, nitrogen regulation protein NtrB         | COG3852 | T | 361 | 518 | -157 |
| RCA23_c15750 | 1693055 | 1694299 | nitrogen regulation protein NtrC                           | COG2204 | T | 515 | 426 | 89   |
| RCA23_c15760 | 1694375 | 1696633 | histidine kinase, nitrogen regulation protein NtrY         | COG5000 | T | 356 | 352 | 4    |
| RCA23_c15770 | 1696630 | 1698030 | nitrogen assimilation regulatory protein NtrX              | COG2204 | T | 504 | 383 | 121  |
| RCA23_c15780 | 1698108 | 1699484 | Trk system potassium uptake protein TrkA                   | COG0569 | P | 427 | 389 | 38   |
| RCA23_c15790 | 1699487 | 1700971 | putative Trk system potassium uptake protein trkH          | COG0168 | P | 482 | 534 | -52  |
| RCA23_c15800 | 1701080 | 1701313 | RNA-binding protein Hfq                                    | COG1923 | R | 693 | 491 | 202  |
| RCA23_c15810 | 1701319 | 1702623 | GTP-binding protein HflX                                   | COG2262 | R | 414 | 423 | -9   |
| RCA23_c15820 | 1705060 | 1702583 | acyl-homoserine lactone acylase QuiP                       | COG2366 | R | 244 | 335 | -91  |

|              |         |         |                                                            |         |   |     |     |      |
|--------------|---------|---------|------------------------------------------------------------|---------|---|-----|-----|------|
| RCA23_c15830 | 1705687 | 1705130 | hypothetical protein                                       | COG2930 | S | 247 | 295 | -48  |
| RCA23_c15840 | 1706785 | 1705775 | delta-aminolevulinic acid dehydratase HemB                 | COG0113 | H | 238 | 353 | -115 |
| RCA23_c15850 | 1706883 | 1707368 | hypothetical protein                                       |         |   | 400 | 448 | -48  |
| RCA23_c15860 | 1707395 | 1710835 | transcription-repair-coupling factor Mfd                   | COG1197 | L | 287 | 350 | -63  |
| RCA23_c15870 | 1711473 | 1710832 | putative DSBA-like thioredoxin family protein              | COG2761 | Q | 297 | 350 | -53  |
| RCA23_c15880 | 1712966 | 1711470 | long-chain-fatty-acid-CoA ligase                           | COG0318 | I | 183 | 288 | -105 |
| RCA23_c15890 | 1713007 | 1713654 | HTH-type transcriptional regulator                         | COG1396 | K | 344 | 355 | -11  |
| RCA23_c15900 | 1714310 | 1713651 | aquaporin AqpZ                                             | COG0580 | G | 476 | 472 | 4    |
| RCA23_c15910 | 1716201 | 1714342 | putative extracellular solute-binding protein              | COG4166 | E | 453 | 381 | 72   |
| RCA23_c15920 | 1716981 | 1716376 | lysine exporter protein LysE                               | COG1279 | R | 534 | 383 | 151  |
| RCA23_c15930 | 1717676 | 1716978 | hypothetical protein DUF502                                | COG2928 | S | 372 | 301 | 71   |
| RCA23_c15940 | 1718674 | 1717751 | pseudouridine-5'-phosphate glycosidase PsuG                | COG2313 | Q | 184 | 280 | -96  |
| RCA23_c15950 | 1719592 | 1718678 | hypothetical protein, pfkB family carbohydrate kinase      | COG0524 | G | 194 | 242 | -48  |
| RCA23_c15960 | 1719832 | 1720038 | cold shock protein CspA                                    | COG1278 | K | 361 | 291 | 70   |
| RCA23_c15970 | 1720408 | 1721112 | 30S ribosomal protein S2                                   | COG0052 | J | 423 | 286 | 137  |
| RCA23_c15980 | 1721186 | 1722061 | elongation factor Ts                                       | COG0264 | J | 443 | 397 | 46   |
| RCA23_c15990 | 1723202 | 1722168 | hypothetical protein                                       |         |   | 215 | 203 | 12   |
| RCA23_c16000 | 1723712 | 1723203 | hypothetical protein, acetyltransferase-like               | COG1670 | J | 194 | 134 | 60   |
| RCA23_c16010 | 1724127 | 1723705 | hypothetical protein, transcription factor NusA like       |         |   | 194 | 156 | 38   |
| RCA23_c16020 | 1724961 | 1724428 | putative phenylacetic acid degradation protein             | COG0663 | R | 265 | 270 | -5   |
| RCA23_c16030 | 1725592 | 1724951 | guanylate kinase Gmk                                       | COG0194 | F | 475 | 457 | 18   |
| RCA23_c16040 | 1726466 | 1725597 | hypothetical protein, YicC-like                            | COG1561 | S | 323 | 347 | -24  |
| RCA23_c16050 | 1726645 | 1727271 | hypothetical protein, DUF1457                              | COG5388 | S | 144 | 183 | -39  |
| RCA23_c16060 | 1728661 | 1727291 | phospho-2-dehydro-3-deoxyheptonate aldolase                | COG3200 | E | 330 | 309 | 21   |
| RCA23_c16070 | 1728824 | 1729837 | putative HTH-type transcriptional regulator, AraC family   | COG4977 | K | 326 | 340 | -14  |
| RCA23_c16080 | 1729969 | 1731150 | putative amino-acid binding protein                        | COG0683 | E | 196 | 180 | 16   |
| RCA23_c16090 | 1731226 | 1732005 | putative branched-chain amino acid transport ATP-binding p | COG0411 | E | 241 | 251 | -10  |
| RCA23_c16100 | 1732002 | 1732715 | putative branched-chain amino acid transport ATP-binding p | COG0410 | E | 163 | 218 | -55  |
| RCA23_c16110 | 1732719 | 1733732 | putative branched-chain amino acid transport system perme  | COG0559 | E | 255 | 366 | -111 |
| RCA23_c16120 | 1733729 | 1735063 | putative branched-chain amino acid transport system perme  | COG4177 | E | 234 | 308 | -74  |

|              |         |         |                                                            |         |   |     |     |      |
|--------------|---------|---------|------------------------------------------------------------|---------|---|-----|-----|------|
| RCA23_c16130 | 1735123 | 1736940 | GTP-binding protein TypA                                   | COG1217 | T | 275 | 334 | -59  |
| RCA23_c16140 | 1737304 | 1737014 | hypothetical protein DUF1330                               | COG5470 | S | 210 | 320 | -110 |
| RCA23_c16150 | 1740028 | 1737311 | alanyl-tRNA synthase AlaS                                  | COG0013 | J | 300 | 335 | -35  |
| RCA23_c16160 | 1741231 | 1740119 | protein RecA                                               | COG0468 | L | 701 | 482 | 219  |
| RCA23_c16170 | 1741383 | 1741979 | hypothetical protein                                       |         |   | 495 | 354 | 141  |
| RCA23_c16180 | 1743391 | 1741988 | sensor transduction histidine kianse                       | COG0642 | T | 488 | 383 | 105  |
| RCA23_c16190 | 1744278 | 1743409 | hypothetical protein                                       |         |   | 338 | 362 | -24  |
| RCA23_c16200 | 1745526 | 1744369 | hypothetical protein, NOL1/NOP2/sun family                 | COG0144 | J | 284 | 351 | -67  |
| RCA23_c16210 | 1746815 | 1745526 | inosine-5'-monophosphate dehydrogenase GuaB                | COG0516 | F | 165 | 267 | -102 |
| RCA23_c16220 | 1747235 | 1749274 | hypothetical protein                                       | COG3894 | R | 252 | 383 | -131 |
| RCA23_c16240 | 1750674 | 1749451 | cysteine desulfurase SufS                                  | COG0520 | E | 271 | 289 | -18  |
| RCA23_c16250 | 1751249 | 1750671 | hypothetical protein                                       |         |   | 453 | 462 | -9   |
| RCA23_c16260 | 1751722 | 1751246 | hypothetical protein                                       |         |   | 225 | 326 | -101 |
| RCA23_c16270 | 1752993 | 1751728 | FeS assembly protein SufD                                  | COG0719 | O | 389 | 321 | 68   |
| RCA23_c16280 | 1753748 | 1752993 | FeS assembly ATPase SufC                                   | COG0396 | O | 763 | 557 | 206  |
| RCA23_c16290 | 1755321 | 1753810 | FeS assembly protein SufB                                  | COG0719 | O | 654 | 401 | 253  |
| RCA23_c16300 | 1756376 | 1755327 | putative cysteine desulfurase                              | COG1104 | E | 226 | 294 | -68  |
| RCA23_c16310 | 1756801 | 1756373 | HTH-type transcriptional regulator Rrf2                    | COG1959 | K | 288 | 297 | -9   |
| RCA23_c16320 | 1757012 | 1757665 | hypothetical protein                                       | COG2945 | R | 375 | 324 | 51   |
| RCA23_c16330 | 1757780 | 1758907 | putative oxidoreductase                                    | COG0673 | R | 247 | 281 | -34  |
| RCA23_c16340 | 1758960 | 1759811 | inosose dehydratase lolE                                   | COG1082 | G | 288 | 364 | -76  |
| RCA23_c16350 | 1759823 | 1760977 | putative oxidoreductase                                    | COG0673 | R | 306 | 350 | -44  |
| RCA23_c16360 | 1762000 | 1760999 | HTH-type transcriptional repressor, LacI family            | COG1609 | K | 336 | 279 | 57   |
| RCA23_c16370 | 1762217 | 1762014 | hypothetical protein                                       |         |   | 574 | 457 | 117  |
| RCA23_c16380 | 1762996 | 1762214 | sugar (ribose) ABC-transport system ATP binding protein    | COG1129 | G | 573 | 414 | 159  |
| RCA23_c16390 | 1764085 | 1763012 | sugar (ribose) ABC transporter permease protein            | COG1172 | G | 736 | 471 | 265  |
| RCA23_c16400 | 1765194 | 1764175 | sugar (ribose) ABC transporter periplasmic binding protein | COG1879 | G | 541 | 324 | 217  |
| RCA23_c16410 | 1766724 | 1765405 | beta-glucosidase BglA                                      | COG2723 | G | 315 | 289 | 26   |
| RCA23_c16420 | 1767779 | 1766721 | maltose/maltodextrin import ATP-binding protein MalK       | COG3839 | G | 335 | 415 | -80  |
| RCA23_c16430 | 1769330 | 1767780 | putative alpha-glucosidase AglA                            | COG0366 | G | 330 | 387 | -57  |

|              |         |         |                                                            |         |   |     |     |      |
|--------------|---------|---------|------------------------------------------------------------|---------|---|-----|-----|------|
| RCA23_c16440 | 1770025 | 1769333 | alpha-glucoside transport system permease protein AglG     | COG0395 | G | 485 | 419 | 66   |
| RCA23_c16450 | 1770558 | 1770022 | ABC transporter, membrane spanning protein                 | COG0395 | G | 344 | 327 | 17   |
| RCA23_c16460 | 1771823 | 1770570 | alpha-glucoside transport system permease protein AglF     | COG1175 | G | 696 | 565 | 131  |
| RCA23_c16470 | 1773262 | 1771922 | alpha-glucosides-binding periplasmic protein AglE          | COG1653 | G | 753 | 462 | 291  |
| RCA23_c16480 | 1773635 | 1774675 | HTH-type transcriptional regulator                         | COG1609 | K | 265 | 360 | -95  |
| RCA23_c16490 | 1775566 | 1774682 | oxidoreductase                                             | COG4989 | R | 197 | 228 | -31  |
| RCA23_c16500 | 1776723 | 1775566 | alkanesulfonate monooxygenase SsuD                         | COG2141 | C | 310 | 287 | 23   |
| RCA23_c16510 | 1776787 | 1777521 | putative regulatory DNA binding protein                    | COG2188 | K | 311 | 294 | 17   |
| RCA23_c16520 | 1777531 | 1778616 | putative oxidoreductase                                    | COG0673 | R | 256 | 312 | -56  |
| RCA23_c16530 | 1780202 | 1778613 | glucose-6-phosphate isomerase Pgi                          | COG0166 | G | 219 | 289 | -70  |
| RCA23_c16540 | 1780889 | 1780212 | 6-phosphogluconolactonase Pgl                              | COG0363 | G | 228 | 320 | -92  |
| RCA23_c16550 | 1782340 | 1780889 | glucose-6-phosphate 1-dehydrogenase Zwf                    | COG0364 | G | 280 | 364 | -84  |
| RCA23_c16560 | 1782518 | 1783450 | hypothetical protein, radical SAM                          | COG0535 | R | 211 | 260 | -49  |
| RCA23_c16570 | 1784031 | 1783447 | putative 5-methylcytosine-specific restriction enzyme McrA | COG1403 | V | 336 | 360 | -24  |
| RCA23_c16580 | 1784786 | 1784112 | putative phospholipase/carboxylesterase                    | COG0400 | R | 320 | 433 | -113 |
| RCA23_c16590 | 1785406 | 1784783 | HhH-GPD superfamily base excision DNA repair protein       | COG0122 | L | 201 | 319 | -118 |
| RCA23_c16600 | 1786128 | 1785397 | precorrin-6A reductase CobK                                | COG2099 | H | 207 | 313 | -106 |
| RCA23_c16610 | 1787144 | 1786125 | cobalamin (vitamin B12) biosynthesis CbiDprotein CbiD      | COG1903 | H | 234 | 296 | -62  |
| RCA23_c16620 | 1787265 | 1788116 | uroporphyrinogen-III C-methyltransferase CobA              | COG0007 | H | 228 | 319 | -91  |
| RCA23_c16630 | 1788113 | 1789378 | cobyrinic acid A,C-diamide synthase CobB                   | COG1797 | H | 219 | 233 | -14  |
| RCA23_c16640 | 1789397 | 1790620 | putative major facilitator superfamily transporter         |         |   | 279 | 340 | -61  |
| RCA23_c16650 | 1791369 | 1790629 | hypothetical protein                                       | COG1562 | I | 196 | 257 | -61  |
| RCA23_c16660 | 1792730 | 1791366 | cysteinyI-tRNA synthase CysS                               | COG0215 | J | 268 | 283 | -15  |
| RCA23_c16670 | 1792939 | 1794108 | aspartate aminotransferase AspC                            | COG0436 | E | 174 | 265 | -91  |
| RCA23_c16680 | 1794310 | 1795845 | trimethylamine methyltransferase MttB                      | COG5598 | H | 206 | 357 | -151 |
| RCA23_c16690 | 1797683 | 1795869 | ABC transporter ATP-binding protein Uup                    | COG0488 | R | 291 | 374 | -83  |
| RCA23_c16700 | 1798221 | 1797715 | hypothetical protein                                       | COG3176 | R | 334 | 381 | -47  |
| RCA23_c16710 | 1798563 | 1798961 | peptide methionine sulfoxide reductase MsrB                | COG0229 | O | 307 | 366 | -59  |
| RCA23_c16720 | 1799290 | 1798958 | hypothetical protein, lipoprotein                          | COG2913 | J | 179 | 299 | -120 |
| RCA23_c16730 | 1799541 | 1800038 | hypothetical protein                                       | COG1399 | R | 327 | 476 | -149 |

|              |         |         |                                                            |         |   |       |     |       |
|--------------|---------|---------|------------------------------------------------------------|---------|---|-------|-----|-------|
| RCA23_c16740 | 1800483 | 1801568 | fatty acid/phospholipid synthesis protein PlsX             | COG0416 | I | 370   | 356 | 14    |
| RCA23_c16750 | 1801571 | 1802533 | 3-oxoacyl-[acyl-carrier-protein] synthase FabH             | COG0332 | I | 321   | 335 | -14   |
| RCA23_c16760 | 1802638 | 1802916 | integration host factor alpha subunit IhfA                 | COG0776 | L | 908   | 657 | 251   |
| RCA23_c16770 | 1802922 | 1803605 | hypothetical protein, MerR family regulatory protein       | COG0789 | K | 363   | 366 | -3    |
| RCA23_c16790 | 1803802 | 1804875 | deoxyguanosinetriphosphate triphosphohydrolase-like prote  | COG0717 | F | 284   | 273 | 11    |
| RCA23_c16800 | 1805746 | 1805078 | putative segregation and condensation protein B            | COG1386 | K | 292   | 333 | -41   |
| RCA23_c16810 | 1806524 | 1805739 | hypothetical protein, segregation and condensation protein | COG1354 | S | 264   | 347 | -83   |
| RCA23_c16820 | 1807519 | 1806524 | beta-hexosaminidase NagZ                                   | COG1472 | G | 233   | 290 | -57   |
| RCA23_c16830 | 1808420 | 1807533 | hypothetical protein                                       |         |   | 203   | 222 | -19   |
| RCA23_c16840 | 1810236 | 1808491 | arginyl-tRNA synthase                                      | COG0018 | J | 357   | 365 | -8    |
| RCA23_c16850 | 1811427 | 1810285 | deoxyguanosinetriphosphate triphosphohydrolase-like prote  | COG0232 | F | 269   | 313 | -44   |
| RCA23_c16860 | 1811504 | 1811830 | putative iron-sulfur insertion protein erpA                | COG0316 | S | 581   | 371 | 210   |
| RCA23_c16870 | 1811876 | 1812664 | exodeoxyribonuclease III                                   | COG0708 | L | 439   | 421 | 18    |
| RCA23_c16880 | 1813149 | 1812685 | putative cytochrome B561                                   | COG3038 | C | 276   | 347 | -71   |
| RCA23_c16890 | 1813755 | 1813333 | putative dnaK suppressor protein dksA                      | COG1734 | T | 459   | 450 | 9     |
| RCA23_c16900 | 1813911 | 1814750 | hypothetical protein                                       | COG0714 | R | 623   | 506 | 117   |
| RCA23_c16910 | 1814970 | 1816151 | hypothetical protein                                       | COG3825 | S | 326   | 385 | -59   |
| RCA23_c16920 | 1816264 | 1816953 | putative peptidase, M48 family                             | COG0501 | O | 364   | 324 | 40    |
| RCA23_c16930 | 1817481 | 1816948 | hypothetical protein                                       |         |   | 233   | 300 | -67   |
| RCA23_c16940 | 1818677 | 1817481 | putative ribosomal RNA large subunit methyltransferase     | COG1092 | R | 266   | 302 | -36   |
| RCA23_c16950 | 1818800 | 1820605 | phosphogluconate dehydratase Edd                           | COG0129 | E | 268   | 330 | -62   |
| RCA23_c16960 | 1820631 | 1821248 | KHG/KDPG aldolase Eda                                      | COG0800 | G | 181   | 211 | -30   |
| RCA23_c16970 | 1821507 | 1821208 | hypothetical protein                                       |         |   | 267   | 405 | -138  |
| RCA23_c16980 | 1824217 | 1821497 | glutamate-ammonia-ligase adenylyltransferase GlnE          | COG1391 | O | 227   | 331 | -104  |
| RCA23_c16990 | 1824296 | 1824769 | hypothetical protein                                       | COG2606 | S | 270   | 333 | -63   |
| RCA23_c17000 | 1824858 | 1825280 | hypothetical protein                                       |         |   | 1.898 | 707 | 1.191 |
| RCA23_c17010 | 1825558 | 1825782 | hypothetical protein                                       |         |   | 304   | 243 | 61    |
| RCA23_c17020 | 1826061 | 1825840 | hypothetical protein                                       |         |   | 247   | 200 | 47    |
| RCA23_c17030 | 1827217 | 1826054 | putative aromatic-ring-hydroxylating dioxygenase           | COG4638 | P | 320   | 342 | -22   |
| RCA23_c17040 | 1827932 | 1827375 | putative acetolactate synthase small subunit IlvH          | COG0440 | E | 419   | 452 | -33   |



|              |         |         |                                                     |         |   |     |     |      |
|--------------|---------|---------|-----------------------------------------------------|---------|---|-----|-----|------|
| RCA23_c17050 | 1829695 | 1827944 | acetolactate synthase isozyme large subunit llvl    | COG0028 | E | 380 | 318 | 62   |
| RCA23_c17060 | 1830055 | 1831023 | hypothetical membrane protein, porin-like           |         |   | 724 | 550 | 174  |
| RCA23_c17070 | 1831298 | 1832551 | TRAP dicarboxylate transporter, subunit DctP        | COG4663 | Q | 407 | 376 | 31   |
| RCA23_c17080 | 1832674 | 1833531 | TRAP dicarboxylate transporter, subunit DctQ        | COG4665 | Q | 711 | 490 | 221  |
| RCA23_c17090 | 1833543 | 1835897 | TRAP dicarboxylate transporter, subunit DctM        | COG4664 | Q | 337 | 395 | -58  |
| RCA23_c17100 | 1836779 | 1835958 | putative arginyl-tRNA--protein transferase Ate      | COG2935 | O | 448 | 457 | -9   |
| RCA23_c17110 | 1840606 | 1836959 | vitamin B12-dependent ribonucleotide reductase NrdJ | COG0209 | F | 477 | 377 | 100  |
| RCA23_c17120 | 1840806 | 1841066 | hypothetical protein                                |         |   | 175 | 144 | 31   |
| RCA23_c17140 | 1841706 | 1841278 | hypothetical protein DUF192                         | COG1430 | S | 474 | 371 | 103  |
| RCA23_c17150 | 1842275 | 1841745 | cold shock protein                                  | COG1278 | K | 334 | 425 | -91  |
| RCA23_c17160 | 1843096 | 1842491 | pyridoxine/pyridoxamine 5'-phosphate oxidase PdxH   | COG0259 | H | 276 | 337 | -61  |
| RCA23_c17170 | 1843179 | 1843967 | enoyl-[acyl-carrier-protein] reductase FabI         | COG0623 | I | 385 | 443 | -58  |
| RCA23_c17180 | 1844001 | 1844504 | xanthine phosphoribosyltransferase Gpt              | COG0503 | F | 270 | 379 | -109 |
| RCA23_c17190 | 1844553 | 1845488 | pyrimidine-specific ribonucleoside hydrolase RihA   | COG1957 | F | 181 | 247 | -66  |
| RCA23_c17200 | 1845485 | 1846876 | hypothetical protein UPF0061                        | COG0397 | S | 227 | 261 | -34  |
| RCA23_c17210 | 1846923 | 1848170 | putative sodium/hydrogen exchanger                  | COG0025 | P | 328 | 487 | -159 |
| RCA23_c17220 | 1848192 | 1848626 | ferric uptake regulator protein Fur                 | COG0735 | P | 556 | 482 | 74   |
| RCA23_c17230 | 1848619 | 1849494 | putative S-adenosylmethionine uptake transporter    | COG0697 | G | 301 | 356 | -55  |
| RCA23_c17240 | 1849532 | 1850851 | enolase Eno                                         | COG0148 | G | 302 | 407 | -105 |
| RCA23_c17250 | 1852135 | 1851050 | anhydro-N-acetylmuramic acid kinase AnmK            | COG2377 | O | 202 | 334 | -132 |
| RCA23_c17260 | 1852202 | 1853452 | tyrosyl-tRNA synthase TyrS                          | COG0162 | J | 477 | 463 | 14   |
| RCA23_c17270 | 1853449 | 1854615 | aspartate aminotransferase AspC                     | COG0436 | E | 258 | 354 | -96  |
| RCA23_c17280 | 1854680 | 1856539 | hypothetical protein                                | COG0760 | O | 297 | 306 | -9   |
| RCA23_c17290 | 1856545 | 1858056 | anthranilate synthase component TrpE                | COG0147 | E | 224 | 249 | -25  |
| RCA23_c17300 | 1858187 | 1859110 | protein soxG                                        | COG0491 | R | 323 | 315 | 8    |
| RCA23_c17310 | 1859114 | 1860058 | protein soxH                                        | COG0491 | R | 362 | 449 | -87  |
| RCA23_c17320 | 1861293 | 1860073 | 5-aminolevulinate synthase HemA                     | COG0156 | H | 337 | 393 | -56  |
| RCA23_c17330 | 1861747 | 1861295 | sulfide dehydrogenase flavoprotein chain SoxF       | COG3439 | S | 404 | 468 | -64  |
| RCA23_c17340 | 1862211 | 1861777 | domain of unknown function DUF1791                  | COG1416 | S | 351 | 361 | -10  |
| RCA23_c17350 | 1863325 | 1862297 | sulfite oxidase cytochrome subunit SoxD             | COG3474 | C | 410 | 350 | 60   |

|              |         |         |                                                 |         |   |     |     |      |
|--------------|---------|---------|-------------------------------------------------|---------|---|-----|-----|------|
| RCA23_c17360 | 1864577 | 1863309 | sulfite oxidase molybdopterin subunit SoxC      | COG2041 | R | 409 | 366 | 43   |
| RCA23_c17370 | 1866311 | 1864608 | sulfur oxidation protein SoxB                   | COG0737 | F | 518 | 409 | 109  |
| RCA23_c17380 | 1867248 | 1866412 | diheme cytochrome c                             | COG3258 | C | 536 | 298 | 238  |
| RCA23_c17390 | 1867605 | 1867276 | protein SoxZ                                    |         |   | 570 | 470 | 100  |
| RCA23_c17400 | 1868053 | 1867631 | protein SoxY                                    | COG5501 | S | 301 | 243 | 58   |
| RCA23_c17410 | 1868532 | 1868083 | cytochrome c                                    | COG2010 | C | 404 | 363 | 41   |
| RCA23_c17420 | 1869206 | 1868649 | thioredoxin SoxW                                | COG2143 | O | 639 | 479 | 160  |
| RCA23_c17430 | 1869959 | 1869219 | cytochrome c-type biogenesis protein SoxV       | COG0785 | O | 588 | 396 | 192  |
| RCA23_c17440 | 1870030 | 1870389 | protein SoxS                                    |         |   | 435 | 382 | 53   |
| RCA23_c17450 | 1870466 | 1870801 | HTH-type transcriptional regulator, ArsR family | COG0640 | K | 321 | 345 | -24  |
| RCA23_c17460 | 1870811 | 1871866 | putative soxT, transmembrane protein DUF395     | COG2391 | R | 242 | 311 | -69  |
| RCA23_c17470 | 1872074 | 1873135 | hypothetical protein DUF395                     | COG2391 | R | 383 | 379 | 4    |
| RCA23_c17480 | 1874065 | 1873184 | NAD-binding protein                             | COG2084 | I | 184 | 255 | -71  |
| RCA23_c17490 | 1875045 | 1874071 | glyoxylate reductase GyaR                       | COG1052 | C | 161 | 206 | -45  |
| RCA23_c17500 | 1876573 | 1875236 | glutamyl-tRNA(Gln) amidotransferase subunit A   | COG0154 | J | 174 | 225 | -51  |
| RCA23_c17510 | 1877949 | 1876570 | TRAP dicarboxylate transporter, subunit DctM    | COG4664 | Q | 358 | 314 | 44   |
| RCA23_c17520 | 1878581 | 1877964 | TRAP dicarboxylate transporter, subunit DctQ    | COG4665 | Q | 460 | 318 | 142  |
| RCA23_c17530 | 1879745 | 1878651 | TRAP dicarboxylate transporter, subunit DctP    | COG4663 | Q | 421 | 267 | 154  |
| RCA23_c17540 | 1880759 | 1880388 | hypothetical protein                            |         |   | 351 | 196 | 155  |
| RCA23_c17550 | 1883014 | 1881539 | glycerol kinase GlpK                            | COG0554 | C | 190 | 274 | -84  |
| RCA23_c17560 | 1883797 | 1883087 | ribosomal RNA large subunit methyltransferase J | COG0293 | J | 286 | 438 | -152 |
| RCA23_c17570 | 1884919 | 1883804 | putative Ppx/GppA phosphatase family protein    | COG0248 | F | 321 | 343 | -22  |
| RCA23_c17580 | 1885166 | 1885453 | hypothetical protein                            |         |   | 298 | 453 | -155 |
| RCA23_c17590 | 1885491 | 1886417 | hypothetical protein                            | COG0685 | E | 250 | 310 | -60  |
| RCA23_c17600 | 1886430 | 1887494 | pterin domain containing enzyme                 | COG1410 | E | 257 | 263 | -6   |
| RCA23_c17610 | 1888307 | 1887537 | HpcH/HpaI aldolase family protein               | COG3836 | G | 262 | 427 | -165 |
| RCA23_c17620 | 1888466 | 1889464 | glucokinase Glk                                 | COG0837 | G | 320 | 380 | -60  |
| RCA23_c17630 | 1889451 | 1890644 | hypothetical protein DUF1006                    | COG3214 | S | 188 | 320 | -132 |
| RCA23_c17640 | 1893859 | 1890659 | reductive dehalogenase                          | COG1018 | C | 279 | 315 | -36  |
| RCA23_c17650 | 1894859 | 1893852 | hypothetical protein, XdhC and CoxI             | COG1975 | O | 205 | 328 | -123 |

|              |         |         |                                                       |         |   |     |     |      |
|--------------|---------|---------|-------------------------------------------------------|---------|---|-----|-----|------|
| RCA23_c17660 | 1895830 | 1894940 | 2-hydroxy-3-oxopropionate reductase GlxR              | COG2084 | I | 232 | 253 | -21  |
| RCA23_c17670 | 1896292 | 1897032 | 3-hydroxybutyrate dehydrogenase                       | COG1028 | I | 356 | 301 | 55   |
| RCA23_c17680 | 1897074 | 1898861 | dihydroxy-acid dehydratase llvD                       | COG0129 | E | 259 | 298 | -39  |
| RCA23_c17690 | 1898872 | 1899720 | fumarylacetoacetate hydrolase                         | COG0179 | Q | 276 | 301 | -25  |
| RCA23_c17700 | 1899793 | 1900119 | hypothetical protein                                  |         |   | 128 | 158 | -30  |
| RCA23_c17710 | 1900591 | 1900169 | nucleoside diphosphate kinase Ndk                     | COG0105 | F | 455 | 256 | 199  |
| RCA23_c17720 | 1900744 | 1902597 | hypothetical protein                                  |         |   | 97  | 96  | 1    |
| RCA23_c17730 | 1902629 | 1904470 | ABC transporter ATP-binding protein                   | COG0488 | R | 222 | 265 | -43  |
| RCA23_c17740 | 1904463 | 1905104 | MarC family integral membrane protein                 | COG2095 | U | 403 | 394 | 9    |
| RCA23_c17750 | 1905138 | 1905722 | hypothetical protein                                  | COG3577 | R | 305 | 350 | -45  |
| RCA23_c17760 | 1906191 | 1905760 | putative DNA polymerase III chi subunit, HoC          | COG2927 | L | 209 | 241 | -32  |
| RCA23_c17770 | 1907713 | 1906223 | cytosol aminopeptidase PepA                           | COG0260 | E | 268 | 371 | -103 |
| RCA23_c17780 | 1907835 | 1908953 | putative permease, YjgP/YjgQ family                   | COG0795 | R | 524 | 334 | 190  |
| RCA23_c17790 | 1908950 | 1910047 | putative permease, YjgP/YjgQ family                   | COG0795 | R | 326 | 382 | -56  |
| RCA23_c17800 | 1910078 | 1912183 | putative organic solvent tolerance protein            | COG1452 | M | 375 | 389 | -14  |
| RCA23_c17810 | 1912196 | 1913395 | hypothetical protein, SurA                            | COG0760 | O | 287 | 313 | -26  |
| RCA23_c17820 | 1913462 | 1914475 | 4-hydroxythreonine-4-phosphate dehydrogenase PdxA     | COG1995 | H | 207 | 256 | -49  |
| RCA23_c17830 | 1914465 | 1915301 | dimethyladenosine transferase KsgA                    | COG0030 | J | 179 | 238 | -59  |
| RCA23_c17840 | 1916086 | 1915556 | hypothetical protein                                  |         |   | 300 | 334 | -34  |
| RCA23_c17850 | 1917167 | 1916316 | modification methylase, hemK family                   | COG2890 | J | 353 | 442 | -89  |
| RCA23_c17860 | 1918213 | 1917164 | peptide chain release factor 1                        | COG0216 | J | 222 | 312 | -90  |
| RCA23_c17870 | 1918660 | 1918274 | hypothetical protein                                  | COG4446 | S | 205 | 218 | -13  |
| RCA23_c17880 | 1919709 | 1918672 | agmatinase SpeB                                       | COG0010 | E | 232 | 318 | -86  |
| RCA23_c17890 | 1919932 | 1920441 | alpha/beta hydrolase                                  |         |   | 162 | 268 | -106 |
| RCA23_c17900 | 1921451 | 1920480 | agmatinase SpeB                                       | COG0010 | E | 226 | 300 | -74  |
| RCA23_c17910 | 1922618 | 1921452 | hippurate hydrolase HipO                              | COG1473 | R | 195 | 320 | -125 |
| RCA23_c17920 | 1922668 | 1923480 | protein MazG                                          | COG3956 | R | 366 | 371 | -5   |
| RCA23_c17930 | 1923546 | 1924556 | ABC transporter periplasmic iron-binding protein FutA | COG1840 | P | 270 | 407 | -137 |
| RCA23_c17940 | 1925179 | 1924631 | putative peptidyl-prolyl cis-trans isomerase Ppi      | COG0652 | O | 284 | 433 | -149 |
| RCA23_c17950 | 1925684 | 1925172 | putative peptidyl-prolyl cis-trans isomerase Ppi      | COG0652 | O | 415 | 489 | -74  |

|              |         |         |                                                        |         |   |     |     |      |
|--------------|---------|---------|--------------------------------------------------------|---------|---|-----|-----|------|
| RCA23_c17960 | 1925805 | 1926983 | phosphoglycerate kinase P <sub>gk</sub>                | COG0126 | G | 223 | 274 | -51  |
| RCA23_c17970 | 1927091 | 1927984 | fructose-bisphosphate aldolase class 1                 | COG3588 | G | 219 | 411 | -192 |
| RCA23_c17980 | 1928074 | 1928373 | hypothetical protein, septum formation initiator       | COG2919 | D | 299 | 324 | -25  |
| RCA23_c17990 | 1928491 | 1929489 | pyruvate dehydrogenase E1 component alpha subunit PdhA | COG1071 | C | 443 | 418 | 25   |
| RCA23_c18000 | 1929493 | 1930863 | pyruvate dehydrogenase E1 component beta subunit PdhB  | COG0022 | C | 414 | 346 | 68   |
| RCA23_c18010 | 1930874 | 1932154 | dihydrolipoyllysine-residue acetyltransferase PdhC     | COG0508 | C | 253 | 284 | -31  |
| RCA23_c18020 | 1933034 | 1932237 | serine acetyltransferase CysE                          | COG1045 | E | 711 | 414 | 297  |
| RCA23_c18030 | 1934250 | 1933132 | putative gene transfer agent protein                   |         |   | 109 | 156 | -47  |
| RCA23_c18040 | 1935148 | 1934639 | putative gene transfer agent large terminase part 1    | COG5323 | S | 8   | 55  | -47  |
| RCA23_c18050 | 1936044 | 1935133 | putative gene transfer agent large terminase part 2    | COG5323 | S | 121 | 191 | -70  |
| RCA23_c18060 | 1937543 | 1936392 | aminodeoxychorismate lyase                             | COG1559 | R | 246 | 282 | -36  |
| RCA23_c18070 | 1938774 | 1937545 | 3-oxoacyl-[acyl-carrier-protein] synthase FabF         | COG0304 | I | 379 | 520 | -141 |
| RCA23_c18080 | 1939180 | 1938947 | acyl carrier protein AcpP                              | COG0236 | I | 739 | 630 | 109  |
| RCA23_c18090 | 1940136 | 1939399 | 3-oxoacyl-[acyl-carrier-protein] reductase FabG        | COG1028 | I | 252 | 290 | -38  |
| RCA23_c18100 | 1941123 | 1940194 | malonyl CoA-acyl carrier protein transacylase          | COG0331 | I | 204 | 295 | -91  |
| RCA23_c18110 | 1941409 | 1941774 | 30S ribosomal protein S6                               | COG0360 | J | 443 | 354 | 89   |
| RCA23_c18120 | 1941788 | 1942015 | 30S ribosomal protein S18                              | COG0238 | J | 560 | 410 | 150  |
| RCA23_c18130 | 1942052 | 1942645 | 50S ribosomal protein L9                               | COG0359 | J | 546 | 404 | 142  |
| RCA23_c18140 | 1944185 | 1942854 | trigger factor (TF)                                    | COG0544 | O | 758 | 494 | 264  |
| RCA23_c18160 | 1944635 | 1944973 | nitrogen regulatory protein P-II 1                     | COG0347 | E | 931 | 485 | 446  |
| RCA23_c18170 | 1945000 | 1946403 | glutamine synthase GlnA type I                         | COG0174 | E | 786 | 431 | 355  |
| RCA23_c18190 | 1947274 | 1946483 | hypothetical protein                                   |         |   | 262 | 401 | -139 |
| RCA23_c18180 | 1947253 | 1948665 | dimethylpropiothetin dethiomethylase DddP              | COG0006 | E | 254 | 366 | -112 |
| RCA23_c18200 | 1949338 | 1948739 | Biotin transporter BioY                                | COG1268 | R | 244 | 323 | -79  |
| RCA23_c18210 | 1949882 | 1949370 | hypothetical protein                                   |         |   | 250 | 326 | -76  |
| RCA23_c18220 | 1949991 | 1951268 | adenylosuccinate lyase PurB                            | COG0015 | F | 256 | 334 | -78  |
| RCA23_c18230 | 1951352 | 1951684 | putative nitrile hydratase, beta subunit               |         |   | 324 | 231 | 93   |
| RCA23_c18240 | 1951681 | 1951938 | hypothetical protein                                   |         |   | 218 | 264 | -46  |
| RCA23_c18250 | 1951938 | 1952600 | nitrile hydratase alpha subunit NthA                   |         |   | 166 | 214 | -48  |
| RCA23_c18260 | 1952597 | 1953469 | hypothetical protein DUF6 transmembrane                | COG0697 | G | 213 | 283 | -70  |

|              |         |         |                                                              |         |   |     |     |      |
|--------------|---------|---------|--------------------------------------------------------------|---------|---|-----|-----|------|
| RCA23_c18270 | 1953462 | 1954361 | putative lipid A biosynthesis lauroyl acyltransferase        | COG1560 | M | 347 | 371 | -24  |
| RCA23_c18280 | 1955107 | 1954409 | hypothetical protein                                         | COG5429 | S | 489 | 407 | 82   |
| RCA23_c18290 | 1955215 | 1957980 | aconitate hydratase AcnA                                     | COG1048 | C | 388 | 396 | -8   |
| RCA23_c18300 | 1958697 | 1958161 | cytochrome c biogenesis protein CcmG                         | COG0526 | O | 243 | 314 | -71  |
| RCA23_c18310 | 1959609 | 1958839 | cytochrome c-type biogenesis protein CcmC                    | COG0755 | O | 314 | 515 | -201 |
| RCA23_c18320 | 1960296 | 1959640 | cytochrome c-type biogenesis protein CcmB                    | COG2386 | O | 273 | 384 | -111 |
| RCA23_c18330 | 1960907 | 1960293 | cytochrome c biogenesis ATP-binding export protein CcmA      | COG4133 | O | 227 | 402 | -175 |
| RCA23_c18340 | 1961264 | 1960911 | hypothetical protein                                         | COG3737 | S | 379 | 432 | -53  |
| RCA23_c18350 | 1962232 | 1961264 | protein export membrane protein SecF                         | COG0341 | U | 436 | 416 | 20   |
| RCA23_c18360 | 1963867 | 1962236 | protein export membrane protein SecD                         | COG0342 | U | 300 | 327 | -27  |
| RCA23_c18370 | 1964193 | 1963912 | putative immunogenic membrane protein YajC                   | COG1862 | U | 415 | 411 | 4    |
| RCA23_c18380 | 1964441 | 1965733 | seryl-tRNA synthase SerS                                     | COG0172 | J | 267 | 313 | -46  |
| RCA23_c18390 | 1966135 | 1967112 | hypothetical protein, alpha/beta hydrolase-like              | COG2267 | I | 57  | 33  | 24   |
| RCA23_c18400 | 1968740 | 1967283 | GTP-binding protein EngA                                     | COG1160 | R | 288 | 375 | -87  |
| RCA23_c18410 | 1970103 | 1968790 | putative quinoprotein                                        | COG1520 | S | 242 | 318 | -76  |
| RCA23_c18420 | 1970807 | 1970169 | hypothetical protein DUF2133                                 | COG4649 | S | 207 | 259 | -52  |
| RCA23_c18430 | 1971036 | 1972271 | RND efflux transporter, MFP subunit                          | COG0845 | M | 278 | 245 | 33   |
| RCA23_c18440 | 1972307 | 1975867 | RND efflux transporter, permease protein                     | COG0841 | V | 413 | 402 | 11   |
| RCA23_c18450 | 1977696 | 1975885 | ABC transporter ATP-binding protein                          | COG5265 | O | 384 | 385 | -1   |
| RCA23_c18460 | 1979340 | 1977742 | hypothetical protein, peptidoglycan-binding protein domain I | COG1652 | S | 241 | 344 | -103 |
| RCA23_c18470 | 1980799 | 1979921 | protein RarD                                                 | COG2962 | R | 792 | 473 | 319  |
| RCA23_c18480 | 1981500 | 1980901 | superoxide dismutase SodB                                    | COG0605 | P | 814 | 669 | 145  |
| RCA23_c18490 | 1982152 | 1981604 | sarcosine oxidase subunit SoxG                               | COG4583 | E | 434 | 445 | -11  |
| RCA23_c18500 | 1985156 | 1982145 | sarcosine oxidase alpha subunit SoxA                         | COG0404 | E | 308 | 339 | -31  |
| RCA23_c18510 | 1985553 | 1985224 | sarcosine oxidase subunit SoxD                               | COG4311 | E | 215 | 300 | -85  |
| RCA23_c18520 | 1986862 | 1985618 | sarcosine oxidase beta subunit SoxB                          | COG0665 | E | 258 | 354 | -96  |
| RCA23_c18530 | 1987085 | 1988227 | cytochrome c-type biogenesis protein Cych                    | COG4235 | O | 177 | 223 | -46  |
| RCA23_c18540 | 1988224 | 1988700 | hypothetical protein                                         | COG0816 | L | 177 | 338 | -161 |
| RCA23_c18550 | 1988697 | 1988945 | hypothetical protein DUF1289                                 | COG3313 | R | 234 | 344 | -110 |
| RCA23_c18560 | 1989819 | 1989013 | hypothetical protein                                         |         |   | 204 | 305 | -101 |

|              |         |         |                                                           |         |   |     |     |      |
|--------------|---------|---------|-----------------------------------------------------------|---------|---|-----|-----|------|
| RCA23_c18570 | 1990628 | 1989810 | hypothetical protein DUF81                                | COG0730 | R | 187 | 292 | -105 |
| RCA23_c18580 | 1991653 | 1990628 | tRNA-dihydrouridine synthase Dus                          | COG0042 | J | 192 | 241 | -49  |
| RCA23_c18590 | 1992384 | 1991857 | putative peroxiredoxin (thioredoxin reductase)            | COG0678 | O | 16  | 6   | 10   |
| RCA23_c18600 | 1993473 | 1992418 | benzaldehyde dehydrogenase                                | COG1012 | C | 10  | 6   | 4    |
| RCA23_c18610 | 1994144 | 1993836 | hypothetical protein                                      |         |   | 22  | 7   | 15   |
| RCA23_c18620 | 1995454 | 1994423 | hypothetical protein                                      | COG2130 | R | 336 | 356 | -20  |
| RCA23_c18630 | 1995676 | 1996863 | MFS-type transporter                                      | COG2814 | G | 221 | 315 | -94  |
| RCA23_c18640 | 1996989 | 1997762 | sorbitol dehydrogenase                                    | COG1028 | I | 202 | 295 | -93  |
| RCA23_c18650 | 1997773 | 1999044 | 6-hydroxynicotinate 3-monooxygenase                       | COG0654 | H | 179 | 183 | -4   |
| RCA23_c18660 | 1999655 | 1999212 | hypothetical protein                                      |         |   | 176 | 334 | -158 |
| RCA23_c18670 | 2001036 | 1999702 | glycerate kinase                                          | COG2379 | G | 170 | 266 | -96  |
| RCA23_c18680 | 2001093 | 2001482 | putative carboxymuconolactone decarboxylase               | COG0599 | S | 406 | 540 | -134 |
| RCA23_c18690 | 2001563 | 2003575 | 2,4-dienoyl-CoA reductase [NADPH]                         | COG1902 | C | 246 | 338 | -92  |
| RCA23_c18700 | 2005239 | 2003572 | thiamine pyrophosphate protein                            | COG0028 | E | 182 | 231 | -49  |
| RCA23_c18710 | 2006314 | 2005394 | rffG/rfbB: dTDP-glucose 4,6-dehydratase                   | COG1088 | M | 332 | 308 | 24   |
| RCA23_c18720 | 2007489 | 2006419 | hypothetical protein                                      |         |   | 322 | 352 | -30  |
| RCA23_c18730 | 2007506 | 2009269 | choline dehydrogenase BetA                                | COG2303 | E | 198 | 304 | -106 |
| RCA23_c18740 | 2010131 | 2009487 | succinyl-CoA:3-ketoacid-coenzyme A transferase subunit S  | COG2057 | I | 338 | 422 | -84  |
| RCA23_c18750 | 2010826 | 2010131 | succinyl-CoA:3-ketoacid-coenzyme A transferase subunit S  | COG1788 | I | 799 | 597 | 202  |
| RCA23_c18760 | 2011295 | 2011669 | hypothetical membrane protein                             |         |   | 419 | 471 | -52  |
| RCA23_c18770 | 2012857 | 2011751 | putative dimethyl sulfoniopropionate demethylase DmdA     | COG0404 | E | 288 | 455 | -167 |
| RCA23_c18780 | 2013130 | 2015229 | hydantoin utilization protein A                           | COG0145 | E | 214 | 300 | -86  |
| RCA23_c18790 | 2015226 | 2016950 | hydantoin utilization protein B                           | COG0146 | E | 190 | 304 | -114 |
| RCA23_c18800 | 2016951 | 2018159 | FAD dependent oxidoreductase                              | COG0665 | E | 250 | 294 | -44  |
| RCA23_c18810 | 2018159 | 2018995 | hypothetical protein, 3-beta hydroxysteroid dehydrogenase | COG0451 | M | 280 | 321 | -41  |
| RCA23_c18820 | 2019084 | 2019956 | hypothetical protein, serine/threonine-protein kinase     | COG1262 | S | 160 | 199 | -39  |
| RCA23_c18830 | 2021104 | 2019980 | hypothetical protein                                      | COG0457 | R | 168 | 236 | -68  |
| RCA23_c18840 | 2022102 | 2021257 | hypothetical protein DUF1989                              | COG3665 | S | 128 | 236 | -108 |
| RCA23_c18850 | 2022203 | 2023267 | putative diamino propionate ammonia-lyase                 | COG1171 | E | 156 | 175 | -19  |
| RCA23_c18860 | 2023267 | 2024406 | hypothetical protein, metallopeptidase M24                | COG0006 | E | 270 | 264 | 6    |

|              |         |         |                                                               |         |   |     |     |      |
|--------------|---------|---------|---------------------------------------------------------------|---------|---|-----|-----|------|
| RCA23_c18870 | 2024408 | 2025154 | hypothetical protein, Asp/Glu/hydantoin racemase              | COG3473 | Q | 224 | 239 | -15  |
| RCA23_c18880 | 2025960 | 2025172 | putative 3-oxoadipate enol-lactonase 2, alpha/beta hydrolase  | COG0596 | R | 268 | 310 | -42  |
| RCA23_c18890 | 2026549 | 2025953 | hypothetical protein DUF1185                                  |         |   | 387 | 557 | -170 |
| RCA23_c18900 | 2027634 | 2026561 | limonene 1,2-monooxygenase LimB                               | COG2141 | C | 291 | 316 | -25  |
| RCA23_c18910 | 2029075 | 2027600 | aldehyde dehydrogenase, cytosolic                             | COG1012 | C | 197 | 267 | -70  |
| RCA23_c18920 | 2030336 | 2029185 | ABC transporter, spermidine/putrescine import, permease p     | COG1177 | E | 398 | 447 | -49  |
| RCA23_c18930 | 2031682 | 2030432 | ABC transporter, spermidine/putrescine import, permease p     | COG1176 | E | 339 | 358 | -19  |
| RCA23_c18940 | 2032842 | 2031745 | ABC transporter, spermidine/putrescine import, substrate bi   | COG0687 | E | 397 | 254 | 143  |
| RCA23_c18950 | 2034010 | 2032913 | ABC transporter, spermidine/putrescine import, ATP-binding    | COG3842 | E | 529 | 415 | 114  |
| RCA23_c18960 | 2034377 | 2034865 | putative nitrilotriacetate monooxygenase component B          | COG1853 | R | 273 | 303 | -30  |
| RCA23_c18970 | 2034990 | 2035700 | hypothetical protein, DUF268                                  |         |   | 334 | 290 | 44   |
| RCA23_c18980 | 2036599 | 2035859 | hypothetical protein DUF28                                    | COG0217 | S | 633 | 385 | 248  |
| RCA23_c18990 | 2038600 | 2036810 | sodium/sulphate symporter                                     | COG0471 | P | 338 | 413 | -75  |
| RCA23_c19000 | 2039486 | 2038578 | hypothetical protein                                          | COG0697 | G | 338 | 439 | -101 |
| RCA23_c19010 | 2040307 | 2039483 | hypothetical protein                                          | COG1692 | S | 237 | 351 | -114 |
| RCA23_c19020 | 2040825 | 2040358 | osmotically inducible OsmC-like protein                       | COG1764 | O | 222 | 392 | -170 |
| RCA23_c19030 | 2043111 | 2041045 | 3-hydroxyacyl-CoA dehydrogenase, NAD-binding                  | COG1250 | I | 224 | 311 | -87  |
| RCA23_c19040 | 2044071 | 2043151 | putative transcriptional regulator                            | COG0703 | E | 205 | 334 | -129 |
| RCA23_c19050 | 2044508 | 2044068 | thioesterase-like protein                                     | COG0824 | R | 238 | 311 | -73  |
| RCA23_c19060 | 2045700 | 2044510 | benzoyl-CoA oxygenase component A                             | COG0369 | P | 188 | 277 | -89  |
| RCA23_c19070 | 2047239 | 2045734 | benzoyl-CoA oxygenase component B                             | COG3396 | S | 320 | 346 | -26  |
| RCA23_c19080 | 2048905 | 2047250 | benzoyl-CoA-dihydrodiol lyase BoxC                            | COG1024 | I | 315 | 360 | -45  |
| RCA23_c19090 | 2049492 | 2049049 | hypothetical protein DUF309                                   |         |   | 204 | 271 | -67  |
| RCA23_c19100 | 2050211 | 2049489 | alpha/beta hydrolase                                          | COG0596 | R | 179 | 279 | -100 |
| RCA23_c19110 | 2051839 | 2050304 | benzoate-coenzyme A ligase                                    | COG0318 | I | 187 | 281 | -94  |
| RCA23_c19120 | 2052630 | 2052070 | putative 5-formyltetrahydrofolate cyclo-ligase family protein | COG0212 | H | 187 | 344 | -157 |
| RCA23_c19130 | 2054000 | 2052627 | magnesium transporter MgtE                                    | COG2239 | P | 255 | 384 | -129 |
| RCA23_c19140 | 2054072 | 2055358 | guanine deaminase GuaD                                        | COG0402 | F | 196 | 307 | -111 |
| RCA23_c19150 | 2056765 | 2055422 | putative hydroxydechloroatrazine ethylaminohydrolase          | COG0402 | F | 189 | 260 | -71  |
| RCA23_c19160 | 2057582 | 2056758 | putative inositol monophosphatase family protein              | COG0483 | G | 194 | 271 | -77  |

|              |         |         |                                                           |         |   |       |     |      |
|--------------|---------|---------|-----------------------------------------------------------|---------|---|-------|-----|------|
| RCA23_c19170 | 2057984 | 2057688 | putative helix-turn-helix protein                         | COG1396 | K | 318   | 258 | 60   |
| RCA23_c19180 | 2058365 | 2059330 | putative alcohol dehydrogenase                            | COG0604 | C | 268   | 331 | -63  |
| RCA23_c19190 | 2059441 | 2060259 | putative inner membrane protein                           | COG0670 | R | 1.541 | 607 | 934  |
| RCA23_c19200 | 2060615 | 2061193 | hypothetical protein                                      |         |   | 1.346 | 656 | 690  |
| RCA23_c19210 | 2061960 | 2061328 | putative N-acetylmuramoyl-L-alanine amidase amiD          | COG3023 | V | 151   | 239 | -88  |
| RCA23_c19220 | 2062550 | 2062017 | hypothetical protein                                      |         |   | 243   | 299 | -56  |
| RCA23_c19230 | 2064075 | 2062591 | glutamyl-tRNA(Gln) amidotransferase subunit A             | COG0154 | J | 294   | 350 | -56  |
| RCA23_c19240 | 2064362 | 2064075 | aspartyl/glutamyl-tRNA(Asn/Gln) amidotransferase subunit  | COG0721 | J | 232   | 432 | -200 |
| RCA23_c19250 | 2064883 | 2064449 | putative deaminase                                        | COG0590 | F | 205   | 227 | -22  |
| RCA23_c19260 | 2064947 | 2065729 | putative ribosomal large subunit pseudouridine synthase B | COG1187 | J | 199   | 273 | -74  |
| RCA23_c19270 | 2066811 | 2065744 | molybdate ABC transporter, ATP-binding protein ModC       | COG4148 | P | 209   | 359 | -150 |
| RCA23_c19280 | 2067494 | 2066808 | molybdate ABC transporter, permease protein ModB          | COG4149 | P | 241   | 332 | -91  |
| RCA23_c19290 | 2068318 | 2067491 | molybdate ABC transporter, substrate binding protein ModA | COG0725 | P | 231   | 310 | -79  |
| RCA23_c19300 | 2068328 | 2068789 | hypothetical protein, NUDIX hydrolase                     | COG0494 | L | 206   | 453 | -247 |
| RCA23_c19310 | 2068866 | 2069288 | hypothetical protein DUF1178                              | COG5319 | S | 451   | 394 | 57   |
| RCA23_c19320 | 2069388 | 2070611 | aspartokinase LysC                                        | COG0527 | E | 283   | 299 | -16  |
| RCA23_c19330 | 2070626 | 2072872 | phosphoenolpyruvate-protein phosphotransferase PstI       | COG3605 | T | 212   | 271 | -59  |
| RCA23_c19340 | 2073508 | 2073008 | hypothetical protein, acetyltransferase-like              | COG3153 | R | 164   | 260 | -96  |
| RCA23_c19350 | 2073581 | 2074186 | hypothetical protein                                      | COG1853 | R | 202   | 219 | -17  |
| RCA23_c19360 | 2075848 | 2074217 | putative sulfate transporter                              | COG0659 | P | 264   | 369 | -105 |
| RCA23_c19370 | 2076031 | 2076906 | methylthioadenosine phosphorylase MtnP                    | COG0005 | F | 204   | 304 | -100 |
| RCA23_c19380 | 2076963 | 2077523 | adenine phosphoribosyltransferase Apt                     | COG0503 | F | 276   | 337 | -61  |
| RCA23_c19390 | 2078104 | 2077520 | ribosomal-protein-alanine acetyltransferase RimJ          | COG1670 | J | 240   | 287 | -47  |
| RCA23_c19400 | 2079370 | 2078108 | uncharacterized zinc protease YmxG                        | COG0612 | R | 351   | 418 | -67  |
| RCA23_c19410 | 2080752 | 2079367 | threonine synthase ThrC                                   | COG0498 | E | 301   | 345 | -44  |
| RCA23_c19420 | 2081473 | 2080763 | hypothetical protein, SURF1                               | COG3346 | S | 421   | 448 | -27  |
| RCA23_c19430 | 2082328 | 2081525 | cytochrome c oxidase subunit 3                            | COG1845 | C | 694   | 471 | 223  |
| RCA23_c19440 | 2082916 | 2082347 | cytochrome c oxidase assembly protein CtaG                | COG3175 | O | 694   | 524 | 170  |
| RCA23_c19450 | 2084033 | 2083098 | protoheme IX farnesyltransferase CtaB                     | COG0109 | O | 436   | 515 | -79  |
| RCA23_c19460 | 2084904 | 2084056 | cytochrome c oxidase subunit 2 precursor                  | COG1622 | C | 794   | 480 | 314  |



|              |         |         |                                                             |         |   |     |     |      |
|--------------|---------|---------|-------------------------------------------------------------|---------|---|-----|-----|------|
| RCA23_c19470 | 2085093 | 2086514 | protein TldD                                                | COG0312 | R | 190 | 276 | -86  |
| RCA23_c19480 | 2086648 | 2087799 | SMF family protein                                          | COG0758 | L | 160 | 264 | -104 |
| RCA23_c19490 | 2087889 | 2090483 | DNA topoisomerase TopA                                      | COG0550 | L | 240 | 343 | -103 |
| RCA23_c19500 | 2091332 | 2090493 | fructose-bisphosphate aldolase Fba                          | COG0191 | G | 226 | 349 | -123 |
| RCA23_c19510 | 2092171 | 2091329 | 5-deoxy-glucuronate isomerase lolB                          | COG3718 | G | 378 | 459 | -81  |
| RCA23_c19520 | 2093164 | 2092175 | 5-dehydro-2-deoxygluconokinase lolC                         | COG0524 | G | 203 | 302 | -99  |
| RCA23_c19530 | 2095038 | 2093167 | 3D-(3,5/4)-trihydroxycyclohexane-1,2-dione hydrolase lolD   | COG3962 | E | 218 | 303 | -85  |
| RCA23_c19540 | 2096366 | 2095143 | hypothetical protein DUF989                                 | COG3748 | S | 398 | 405 | -7   |
| RCA23_c19550 | 2096731 | 2096378 | 5-hydroxyisourate hydrolase UraH                            | COG2351 | R | 330 | 328 | 2    |
| RCA23_c19560 | 2096794 | 2098206 | uric acid degradation bifunctional protein PuL              | COG3195 | S | 210 | 248 | -38  |
| RCA23_c19570 | 2099161 | 2098337 | putative allantoin catabolism protein YlbA                  | COG3257 | R | 252 | 300 | -48  |
| RCA23_c19580 | 2099379 | 2100608 | sarcosine oxidase beta subunit SoxB                         | COG0665 | E | 248 | 344 | -96  |
| RCA23_c19590 | 2100622 | 2100909 | sarcosine oxidase subunit SoxD                              | COG4311 | E | 235 | 330 | -95  |
| RCA23_c19600 | 2100906 | 2103860 | sarcosine oxidase alpha subunit SoxA                        | COG0404 | E | 185 | 228 | -43  |
| RCA23_c19610 | 2103853 | 2104413 | sarcosine oxidase subunit SoxG                              | COG4583 | E | 217 | 262 | -45  |
| RCA23_c19620 | 2105450 | 2104446 | putative HTH-type transcriptional regulator, AraC family    | COG4977 | K | 207 | 326 | -119 |
| RCA23_c19630 | 2105519 | 2106172 | putative DNA-binding protein                                | COG1396 | K | 275 | 407 | -132 |
| RCA23_c19640 | 2106599 | 2106183 | putative membrane protein                                   |         |   | 218 | 337 | -119 |
| RCA23_c19650 | 2107064 | 2107477 | hypothetical protein                                        |         |   | 576 | 510 | 66   |
| RCA23_c19660 | 2108227 | 2107835 | hypothetical protein, thioesterase                          | COG2050 | Q | 412 | 379 | 33   |
| RCA23_c19670 | 2108892 | 2108230 | hypothetical protein, calcineurin-like phosphoesterase-like | COG1407 | R | 271 | 407 | -136 |
| RCA23_c19680 | 2111360 | 2108931 | putative DEAD/DEAH box helicase                             | COG1201 | R | 207 | 359 | -152 |
| RCA23_c19690 | 2112302 | 2111400 | bidunctional enzyme FOLD                                    | COG0190 | H | 301 | 440 | -139 |
| RCA23_c19700 | 2114064 | 2112388 | formate--tetrahydrofolate ligase Fhs                        | COG2759 | F | 356 | 344 | 12   |
| RCA23_c19710 | 2114959 | 2114357 | hypothetical protein                                        |         |   | 275 | 383 | -108 |
| RCA23_c19720 | 2116937 | 2115018 | cell division protease FtsH                                 | COG0465 | O | 464 | 415 | 49   |
| RCA23_c19730 | 2118254 | 2117031 | tRNA(Ile)-lysine synthase TlIS                              | COG0037 | D | 188 | 268 | -80  |
| RCA23_c19740 | 2119039 | 2118251 | hypothetical protein                                        | COG1729 | S | 214 | 219 | -5   |
| RCA23_c19750 | 2119539 | 2119039 | peptidoglycan-associated lipoprotein Pal                    | COG2885 | M | 189 | 256 | -67  |
| RCA23_c19760 | 2120916 | 2119594 | Tol-Pal system beta propeller repeat protein TolB           | COG0823 | U | 269 | 322 | -53  |

|              |         |         |                                                                 |         |   |     |     |      |
|--------------|---------|---------|-----------------------------------------------------------------|---------|---|-----|-----|------|
| RCA23_c19770 | 2121908 | 2120913 | hypothetical protein, TolA-like                                 |         |   | 194 | 283 | -89  |
| RCA23_c19780 | 2122520 | 2122056 | biopolymer transport protein TolR                               | COG0848 | U | 204 | 389 | -185 |
| RCA23_c19790 | 2123204 | 2122530 | biopolymer transport protein TolQ                               | COG0811 | U | 243 | 362 | -119 |
| RCA23_c19800 | 2123640 | 2123296 | acyl-CoA thioester hydrolase                                    | COG0824 | R | 206 | 269 | -63  |
| RCA23_c19810 | 2124311 | 2123682 | hypothetical protein                                            |         |   | 225 | 325 | -100 |
| RCA23_c19820 | 2125447 | 2124398 | holliday junction ATP-dependent DNA helicase RuvB               | COG2255 | L | 212 | 330 | -118 |
| RCA23_c19830 | 2126118 | 2125444 | holliday junction ATP-dependent DNA helicase RuvA               | COG0632 | L | 241 | 443 | -202 |
| RCA23_c19840 | 2126621 | 2126115 | crossover junction endodeoxyribonuclease RuvC                   | COG0817 | L | 211 | 426 | -215 |
| RCA23_c19850 | 2128058 | 2127186 | putative ribosomal protein L11 methyltransferase                | COG2264 | J | 199 | 331 | -132 |
| RCA23_c19860 | 2128842 | 2128189 | peptide methionine sulfoxide reductase MsrA                     | COG0225 | O | 470 | 535 | -65  |
| RCA23_c19870 | 2130139 | 2128931 | hypothetical protein, major facilitator superfamily transporter |         |   | 568 | 531 | 37   |
| RCA23_c19880 | 2130289 | 2131452 | L-lactate dehydrogenase lldD                                    | COG1304 | C | 384 | 429 | -45  |
| RCA23_c19890 | 2133377 | 2131542 | BCCT family transporter involved in DMSP uptake                 | COG1292 | M | 415 | 398 | 17   |
| RCA23_c19900 | 2134841 | 2133696 | putative MFS-type transporter                                   |         |   | 335 | 395 | -60  |
| RCA23_c19910 | 2134970 | 2135605 | 50S ribosomal protein L25                                       | COG1825 | J | 907 | 573 | 334  |
| RCA23_c19920 | 2135732 | 2136418 | peptidyl-tRNA hydrolase Pth                                     | COG0193 | J | 315 | 395 | -80  |
| RCA23_c19930 | 2136415 | 2137437 | hypothetical protein                                            | COG4427 | S | 189 | 250 | -61  |
| RCA23_c19940 | 2137439 | 2137810 | hypothetical protein                                            | COG3651 | S | 233 | 303 | -70  |
| RCA23_c19950 | 2139068 | 2137836 | tryptophan synthase beta chain TrpB                             | COG0133 | E | 369 | 326 | 43   |
| RCA23_c19960 | 2139789 | 2139151 | N-(5'-phosphoribosyl)anthranilate isomerase TrpF                | COG0135 | E | 185 | 217 | -32  |
| RCA23_c19970 | 2140121 | 2139786 | hypothetical protein                                            |         |   | 393 | 402 | -9   |
| RCA23_c19980 | 2140422 | 2140141 | integration host factor beta subunit lhfb                       | COG0776 | L | 601 | 452 | 149  |
| RCA23_c19990 | 2142345 | 2140684 | 30S ribosomal protein S1                                        | COG0539 | J | 695 | 460 | 235  |
| RCA23_c20000 | 2142605 | 2142934 | hypothetical protein                                            |         |   | 405 | 426 | -21  |
| RCA23_c20010 | 2143968 | 2142946 | hypothetical protein, lacI family HTH-type regulatory protein   | COG1609 | K | 159 | 288 | -129 |
| RCA23_c20020 | 2144050 | 2145192 | putative phytanoyl-CoA dioxygenase                              | COG5285 | Q | 353 | 567 | -214 |
| RCA23_c20030 | 2146137 | 2145199 | aldo/keto reductase                                             | COG0667 | C | 253 | 316 | -63  |
| RCA23_c20040 | 2146855 | 2146184 | cytidylate kinase Cmk                                           | COG0283 | F | 198 | 213 | -15  |
| RCA23_c20050 | 2148201 | 2146852 | 3-phosphoshikimate 1-carboxyvinyltransferase AroA               | COG0128 | E | 215 | 383 | -168 |
| RCA23_c20060 | 2148997 | 2148275 | tRNA (guanine-N(7)-)-methyltransferase TrmB                     | COG0220 | R | 237 | 310 | -73  |

|              |         |         |                                                            |         |   |     |     |      |
|--------------|---------|---------|------------------------------------------------------------|---------|---|-----|-----|------|
| RCA23_c20070 | 2150223 | 2149042 | S-adenosylmethionine synthase MetK                         | COG0192 | H | 360 | 341 | 19   |
| RCA23_c20080 | 2151767 | 2150271 | apolipoprotein N-acyltransferase Lnt                       | COG0815 | M | 237 | 319 | -82  |
| RCA23_c20090 | 2152641 | 2151742 | putative magnesium and cobalt efflux protein               | COG1253 | R | 383 | 427 | -44  |
| RCA23_c20100 | 2153141 | 2152638 | hypothetical protein UPF0054                               | COG0319 | R | 368 | 393 | -25  |
| RCA23_c20110 | 2154136 | 2153138 | PhoH-like protein                                          | COG1702 | T | 275 | 401 | -126 |
| RCA23_c20120 | 2155564 | 2154233 | RNA modification enzyme, MiaB family                       | COG0621 | J | 275 | 292 | -17  |
| RCA23_c20130 | 2155629 | 2156543 | hypothetical protein                                       |         |   | 513 | 459 | 54   |
| RCA23_c20140 | 2156986 | 2156552 | putative ferric uptake regulator family protein            | COG0735 | P | 537 | 555 | -18  |
| RCA23_c20150 | 2157143 | 2157652 | 3-hydroxydecanoyl-[acyl-carrier-protein] dehydratase FabA  | COG0764 | I | 376 | 331 | 45   |
| RCA23_c20160 | 2157667 | 2158896 | 3-oxoacyl-[acyl-carrier-protein] synthase FabB             | COG0304 | I | 361 | 339 | 22   |
| RCA23_c20170 | 2158901 | 2159689 | enoyl-[acyl-carrier-protein] reductase FabI                | COG0623 | I | 292 | 375 | -83  |
| RCA23_c20180 | 2160715 | 2159738 | threo-3-hydroxyaspartate ammonia-lyase SRY                 | COG1171 | E | 167 | 199 | -32  |
| RCA23_c20190 | 2161402 | 2160719 | 2-haloalkanoic acid dehalogenase                           | COG1011 | R | 258 | 323 | -65  |
| RCA23_c20200 | 2161460 | 2162248 | 3-oxoadipate enol-lactonase CatD                           | COG0596 | R | 289 | 372 | -83  |
| RCA23_c20210 | 2162268 | 2163494 | putative tetracycline resistance protein, class C          | COG2814 | G | 193 | 322 | -129 |
| RCA23_c20220 | 2163510 | 2164649 | NAD/mycothiol-dependent formaldehyde dehydrogenase         | COG1062 | C | 189 | 249 | -60  |
| RCA23_c20230 | 2164704 | 2165945 | D-galactonate dehydratase DgoD                             | COG4948 | M | 320 | 382 | -62  |
| RCA23_c20240 | 2168433 | 2165986 | dimethylglycine dehydrogenase                              | COG0404 | E | 269 | 340 | -71  |
| RCA23_c20250 | 2170044 | 2168488 | trimethylamine methyltransferase MttB                      | COG5598 | H | 270 | 344 | -74  |
| RCA23_c20260 | 2170193 | 2170597 | hypothetical protein                                       | COG0607 | P | 248 | 216 | 32   |
| RCA23_c20270 | 2170629 | 2171999 | uncharacterized aminotransferase                           | COG0161 | H | 325 | 341 | -16  |
| RCA23_c20280 | 2172154 | 2173251 | aminomethyltransferase, mitochondrial                      | COG0404 | E | 364 | 312 | 52   |
| RCA23_c20290 | 2173265 | 2173630 | glycine cleavage system protein GcvH                       | COG0509 | E | 591 | 456 | 135  |
| RCA23_c20300 | 2173679 | 2176525 | glycine dehydrogenase GcvP                                 | COG1003 | E | 291 | 292 | -1   |
| RCA23_c20310 | 2177847 | 2176510 | D-amino acid dehydrogenase small subunit DadA              | COG0665 | E | 184 | 266 | -82  |
| RCA23_c20320 | 2177927 | 2178970 | putrescine ABC transport system putrescine-binding peripla | COG0687 | E | 343 | 375 | -32  |
| RCA23_c20330 | 2180246 | 2179164 | putrescine ABC transport system ATP-binding protein PotG   | COG3842 | E | 257 | 331 | -74  |
| RCA23_c20340 | 2181058 | 2180243 | putrescine ABC transport system permease protein PotI      | COG1177 | E | 470 | 610 | -140 |
| RCA23_c20350 | 2181888 | 2181055 | putrescine ABC transport system permease protein PotB      | COG1176 | E | 607 | 570 | 37   |
| RCA23_c20360 | 2183133 | 2181934 | rieske 2Fe-2S domain protein                               | COG4638 | P | 465 | 415 | 50   |

|              |         |         |                                                            |         |   |     |     |      |
|--------------|---------|---------|------------------------------------------------------------|---------|---|-----|-----|------|
| RCA23_c20370 | 2184561 | 2183245 | TRAP dicarboxylate transporter, subunit DctM               | COG1593 | G | 441 | 547 | -106 |
| RCA23_c20380 | 2185139 | 2184558 | TRAP dicarboxylate transporter, subunit DctQ               | COG3090 | G | 521 | 546 | -25  |
| RCA23_c20390 | 2186242 | 2185214 | TRAP dicarboxylate transporter, subunit DctP               | COG1638 | G | 328 | 358 | -30  |
| RCA23_c20400 | 2186550 | 2187362 | putative phytanoyl-CoA dioxygenase                         | COG5285 | Q | 167 | 221 | -54  |
| RCA23_c20410 | 2188449 | 2187382 | putative phenylacetic acid degradation NADH oxidoreducta:  | COG1018 | C | 203 | 273 | -70  |
| RCA23_c20420 | 2188902 | 2188462 | phenylacetate-CoA oxygenase, subunit PaaD                  | COG2151 | R | 161 | 250 | -89  |
| RCA23_c20430 | 2189696 | 2188944 | phenylacetate-CoA oxygenase, subunit PaaC                  | COG3396 | S | 230 | 299 | -69  |
| RCA23_c20440 | 2189986 | 2189696 | phenylacetate-CoA oxygenase, subunit PaaB                  | COG3460 | Q | 272 | 347 | -75  |
| RCA23_c20450 | 2190999 | 2190007 | phenylacetate-CoA oxygenase, subunit PaaA                  | COG3396 | S | 292 | 384 | -92  |
| RCA23_c20460 | 2191871 | 2191050 | phenylacetic acid degradation operon negative regulatory p | COG3327 | K | 194 | 338 | -144 |
| RCA23_c20470 | 2193916 | 2191868 | phenylacetic acid degradation protein PaaZ                 | COG1012 | C | 200 | 257 | -57  |
| RCA23_c20480 | 2194006 | 2194791 | putative enoyl-CoA hydratase PaaG                          | COG1024 | I | 157 | 198 | -41  |
| RCA23_c20490 | 2194793 | 2195233 | acyl-coenzyme A thioesterase Paal                          | COG2050 | Q | 207 | 193 | 14   |
| RCA23_c20500 | 2195230 | 2196432 | beta-ketoadipyl CoA thiolase PaaJ                          | COG0183 | I | 159 | 218 | -59  |
| RCA23_c20510 | 2196443 | 2197726 | phenylacetate-CoA ligase PaaK                              | COG1541 | H | 258 | 377 | -119 |
| RCA23_c20520 | 2197730 | 2198344 | putative HTH-type transcriptional regulator, TetR family   | COG1309 | K | 255 | 313 | -58  |
| RCA23_c20530 | 2198826 | 2198341 | 3-dehydroquinate dehydratase AroQ                          | COG0757 | E | 480 | 484 | -4   |
| RCA23_c20540 | 2200260 | 2198869 | tyrosine decarboxylase                                     | COG0076 | E | 256 | 302 | -46  |
| RCA23_c20550 | 2200544 | 2201383 | putative short chain dehydrogenase                         | COG0300 | R | 180 | 216 | -36  |
| RCA23_c20560 | 2202389 | 2201403 | hypothetical protein, acetyltransferase-like               | COG1247 | M | 188 | 325 | -137 |
| RCA23_c20570 | 2202793 | 2202455 | protein CsaA                                               | COG0073 | R | 280 | 393 | -113 |
| RCA23_c20580 | 2203601 | 2202786 | pyrroline-5-carboxylate reductase ProC                     | COG0345 | E | 179 | 341 | -162 |
| RCA23_c20590 | 2204138 | 2203635 | hypothetical protein DUF1790                               | COG5465 | S | 484 | 467 | 17   |
| RCA23_c20600 | 2204711 | 2204427 | hypothetical protein DUF526                                | COG2960 | S | 356 | 344 | 12   |
| RCA23_c20610 | 2204859 | 2205740 | prolipoprotein diacylglyceryl transferase Lgt              | COG0682 | M | 217 | 274 | -57  |
| RCA23_c20620 | 2205707 | 2206798 | hypothetical protein DUF185                                | COG1565 | S | 183 | 256 | -73  |
| RCA23_c20630 | 2206795 | 2207550 | multi-copper polyphenol oxidoreductase laccase             | COG1496 | S | 267 | 296 | -29  |
| RCA23_c20640 | 2208728 | 2207769 | hypothetical protein                                       |         |   | 176 | 115 | 61   |
| RCA23_c20650 | 2209482 | 2208988 | leucine-responsive regulatory protein Lrp                  | COG1522 | K | 252 | 363 | -111 |
| RCA23_c20660 | 2209668 | 2210609 | thioredoxin reductase TrxB                                 | COG0492 | O | 277 | 273 | 4    |

|              |         |         |                                                                 |         |   |       |     |       |
|--------------|---------|---------|-----------------------------------------------------------------|---------|---|-------|-----|-------|
| RCA23_c20670 | 2210930 | 2212633 | bifunctional sulfate adenylyltransferase / adenylyl-sulfate kir | COG2046 | P | 237   | 293 | -56   |
| RCA23_c20680 | 2213026 | 2212808 | hypothetical protein DUF1150                                    |         |   | 755   | 497 | 258   |
| RCA23_c20690 | 2213444 | 2213028 | small heat shock protein lbpA                                   | COG0071 | O | 739   | 516 | 223   |
| RCA23_c20700 | 2213600 | 2213815 | hypothetical protein DUF465                                     | COG5481 | S | 416   | 481 | -65   |
| RCA23_c20710 | 2213872 | 2214354 | N5-carboxyaminoimidazole ribonucleotide mutase PurE             | COG0041 | F | 324   | 250 | 74    |
| RCA23_c20720 | 2214347 | 2215408 | N5-carboxyaminoimidazole ribonucleotide synthase PurK           | COG0026 | F | 192   | 252 | -60   |
| RCA23_c20730 | 2216205 | 2215438 | hypothetical protein                                            | COG1075 | R | 302   | 371 | -69   |
| RCA23_c20740 | 2217963 | 2216314 | chaperonin GroEL                                                | COG0459 | O | 1.092 | 481 | 611   |
| RCA23_c20750 | 2218302 | 2218015 | chaperonin GroS                                                 | COG0234 | O | 1.580 | 549 | 1.031 |
| RCA23_c20760 | 2218533 | 2219483 | hypothetical protein                                            |         |   | 272   | 228 | 44    |
| RCA23_c20770 | 2219687 | 2220529 | hypothetical protein                                            |         |   | 311   | 282 | 29    |
| RCA23_c20780 | 2220548 | 2221510 | hypothetical protein                                            |         |   | 256   | 251 | 5     |
| RCA23_c20790 | 2221605 | 2222753 | creatinase                                                      | COG0006 | E | 207   | 242 | -35   |
| RCA23_c20800 | 2222847 | 2223821 | putative membrane lipoprotein                                   |         |   | 262   | 439 | -177  |
| RCA23_c20810 | 2224547 | 2223837 | hypothetical protein DUF261                                     | COG5482 | S | 192   | 370 | -178  |
| RCA23_c20820 | 2224600 | 2225517 | putative manganese-dependent inorganic pyrophosphatase          | COG1227 | C | 323   | 325 | -2    |
| RCA23_c20830 | 2225535 | 2226407 | hypothetical protein, HAD family hydrolase                      | COG0647 | G | 261   | 348 | -87   |
| RCA23_c20840 | 2226492 | 2226935 | putative MaoC-like dehydratase                                  | COG2030 | I | 300   | 344 | -44   |
| RCA23_c20850 | 2226997 | 2227944 | riboflavin biosynthesis protein RibF                            | COG0196 | H | 281   | 423 | -142  |
| RCA23_c20860 | 2227941 | 2228405 | hypothetical protein UPF0260                                    | COG2983 | S | 370   | 349 | 21    |
| RCA23_c20870 | 2228409 | 2229458 | low specificity L-threonine aldolase ItaE                       | COG2008 | E | 279   | 242 | 37    |
| RCA23_c20880 | 2230157 | 2229510 | hypothetical protein, 2-hydroxychromene-2-carboxylate isor      | COG3917 | Q | 254   | 239 | 15    |
| RCA23_c20890 | 2230217 | 2231236 | ribose-phosphate pyrophosphokinase Prs                          | COG0462 | F | 351   | 337 | 14    |
| RCA23_c20900 | 2231567 | 2231247 | hypothetical protein                                            |         |   | 339   | 407 | -68   |
| RCA23_c20910 | 2232095 | 2231688 | ATP synthase epsilon chain AtpC                                 | COG0355 | C | 217   | 213 | 4     |
| RCA23_c20920 | 2233519 | 2232095 | ATP synthase beta subunit AtpD                                  | COG0055 | C | 765   | 423 | 342   |
| RCA23_c20930 | 2234405 | 2233536 | ATP synthase gamma chain AtpG                                   | COG0224 | C | 785   | 455 | 330   |
| RCA23_c20940 | 2235953 | 2234418 | ATP synthase alpha subunit AtpA                                 | COG0056 | C | 653   | 400 | 253   |
| RCA23_c20950 | 2236520 | 2235954 | ATP synthase delta chain AtpH                                   | COG0712 | C | 742   | 430 | 312   |
| RCA23_c20960 | 2237506 | 2236745 | hypothetical protein                                            |         |   | 238   | 284 | -46   |

|              |         |         |                                                            |         |   |     |     |      |
|--------------|---------|---------|------------------------------------------------------------|---------|---|-----|-----|------|
| RCA23_c20970 | 2237568 | 2238365 | hydroxyacylglutathione hydrolase GloB                      | COG0491 | R | 203 | 292 | -89  |
| RCA23_c20980 | 2238504 | 2240834 | ATP-dependent Clp protease ATP-binding subunit ClpA        | COG0542 | O | 394 | 338 | 56   |
| RCA23_c20990 | 2243121 | 2240878 | hypothetical protein, OmpA                                 | COG1360 | N | 305 | 321 | -16  |
| RCA23_c21000 | 2244303 | 2243131 | hypothetical protein                                       |         |   | 257 | 346 | -89  |
| RCA23_c21010 | 2244901 | 2244371 | putative cation transport protein ChaC                     | COG3703 | P | 210 | 316 | -106 |
| RCA23_c21020 | 2245169 | 2246512 | hypothetical protein                                       | COG1357 | S | 297 | 248 | 49   |
| RCA23_c21030 | 2247465 | 2246560 | protein TyrC                                               | COG0287 | E | 207 | 274 | -67  |
| RCA23_c21040 | 2248547 | 2247462 | histidinol-phosphate aminotransferase HisC                 | COG0079 | E | 204 | 333 | -129 |
| RCA23_c21050 | 2249402 | 2248746 | 30S ribosomal protein S4                                   | COG0522 | J | 558 | 359 | 199  |
| RCA23_c21060 | 2251712 | 2249745 | cold-shock DEAD box protein A                              | COG0513 | L | 271 | 328 | -57  |
| RCA23_c21070 | 2252217 | 2251846 | hypothetical protein DUF393                                | COG3011 | S | 295 | 410 | -115 |
| RCA23_c21080 | 2254594 | 2252333 | vitamin B12-dependent ribonucleoside-diphosphate reductase | COG0209 | F | 354 | 420 | -66  |
| RCA23_c21090 | 2254754 | 2255152 | hypothetical protein                                       | COG5458 | S | 170 | 273 | -103 |
| RCA23_c21100 | 2255830 | 2255156 | ATP-phosphoribosyltransferase HisG                         | COG0040 | E | 238 | 409 | -171 |
| RCA23_c21110 | 2256873 | 2255827 | ATP phosphoribosyltransferase regulatory subunit HisZ      | COG3705 | E | 159 | 258 | -99  |
| RCA23_c21120 | 2258375 | 2256870 | histidyl-tRNA synthase HisS                                | COG0124 | J | 253 | 369 | -116 |
| RCA23_c21130 | 2258424 | 2258699 | hypothetical protein                                       | COG2900 | S | 209 | 308 | -99  |
| RCA23_c21140 | 2262238 | 2258738 | DNA polymerase III 1 alpha subunit DnaE                    | COG0587 | L | 327 | 386 | -59  |
| RCA23_c21150 | 2262629 | 2263969 | xanthine dehydrogenase XdhA                                | COG4630 | F | 236 | 242 | -6   |
| RCA23_c21160 | 2263966 | 2266269 | xanthine dehydrogenase XdhB                                | COG4631 | F | 224 | 287 | -63  |
| RCA23_c21170 | 2266266 | 2267186 | xanthine dehydrogenase accessory protein XdhC              | COG1975 | O | 208 | 245 | -37  |
| RCA23_c21180 | 2267183 | 2268688 | sugar ABC transporter, ATP-binding protein                 | COG3845 | R | 202 | 224 | -22  |
| RCA23_c21190 | 2268675 | 2269760 | sugar ABC transporter, permease protein                    | COG4603 | R | 330 | 307 | 23   |
| RCA23_c21200 | 2269741 | 2270742 | ABC transporter permease protein                           | COG1079 | R | 283 | 408 | -125 |
| RCA23_c21210 | 2270770 | 2271849 | putative basic membrane protein                            | COG1744 | R | 455 | 356 | 99   |
| RCA23_c21220 | 2271933 | 2273012 | putative FAD dependent oxidoreductase                      | COG0665 | E | 164 | 201 | -37  |
| RCA23_c21230 | 2275563 | 2273065 | dimethylglycine dehydrogenase                              | COG0404 | E | 264 | 326 | -62  |
| RCA23_c21240 | 2275772 | 2276626 | pantothenate synthase PanC                                 | COG0414 | H | 240 | 384 | -144 |
| RCA23_c21250 | 2276623 | 2277435 | 3-methyl-2-oxobutanoate hydroxymethyltransferase PanB      | COG0413 | H | 307 | 438 | -131 |
| RCA23_c21260 | 2277469 | 2277984 | hypothetical protein                                       | COG3807 | S | 226 | 318 | -92  |

|              |         |         |                                                                 |         |   |     |     |      |
|--------------|---------|---------|-----------------------------------------------------------------|---------|---|-----|-----|------|
| RCA23_c21270 | 2280010 | 2277986 | peptidyl-dipeptidase Dcp                                        | COG0339 | E | 227 | 267 | -40  |
| RCA23_c21280 | 2281046 | 2279997 | molybdopterin biosynthesis protein MoeB                         | COG0476 | H | 211 | 292 | -81  |
| RCA23_c21290 | 2281504 | 2281043 | deoxyuridine 5'-triphosphate nucleotidohydrolase Dut            | COG0756 | F | 194 | 283 | -89  |
| RCA23_c21300 | 2282691 | 2281501 | coenzyme A biosynthesis bifunctional protein CoaBC              | COG0452 | H | 292 | 263 | 29   |
| RCA23_c21310 | 2283626 | 2282748 | RNA polymerase sigma-32 factor RpoH                             | COG0568 | K | 992 | 490 | 502  |
| RCA23_c21320 | 2283716 | 2284249 | bifunctional adenosylcobalamin biosynthesis protein CobP        | COG2087 | H | 179 | 216 | -37  |
| RCA23_c21330 | 2284246 | 2284818 | putative phosphoglycerate mutase family protein                 | COG0406 | G | 125 | 238 | -113 |
| RCA23_c21340 | 2284882 | 2285307 | hypothetical protein, glutathione S-transferase                 | COG0625 | O | 225 | 320 | -95  |
| RCA23_c21350 | 2285323 | 2285757 | glutathione S-transferase family protein                        |         |   | 215 | 332 | -117 |
| RCA23_c21360 | 2285829 | 2286233 | magnesium chelatase-like protein                                | COG0606 | O | 225 | 250 | -25  |
| RCA23_c21370 | 2286230 | 2287420 | magnesium chelatase                                             | COG0606 | O | 163 | 269 | -106 |
| RCA23_c21380 | 2288109 | 2287342 | putative transmembrane protein                                  |         |   | 338 | 385 | -47  |
| RCA23_c21390 | 2289026 | 2288109 | putative sulfite exporter TauE/SafE                             | COG0730 | R | 370 | 455 | -85  |
| RCA23_c21400 | 2290274 | 2289135 | branched-chain amino acid transporter, permease component       | COG1079 | R | 267 | 471 | -204 |
| RCA23_c21410 | 2291340 | 2290279 | branched-chain amino acid transporter, permease component       | COG4603 | R | 290 | 336 | -46  |
| RCA23_c21420 | 2292916 | 2291381 | ABC transporter ATP-binding protein                             | COG3845 | R | 317 | 388 | -71  |
| RCA23_c21430 | 2293990 | 2292992 | putative ABC transporter, periplasmic substrate-binding protein | COG1744 | R | 354 | 382 | -28  |
| RCA23_c21440 | 2294587 | 2294177 | hypothetical protein, acetyltransferase-like                    | COG0456 | R | 209 | 279 | -70  |
| RCA23_c21450 | 2295161 | 2294598 | NifU-like protein                                               | COG0694 | O | 409 | 435 | -26  |
| RCA23_c21460 | 2295762 | 2295250 | putative universal stress protein                               | COG0589 | T | 518 | 514 | 4    |
| RCA23_c21470 | 2296878 | 2295862 | tryptophanyl-tRNA synthase TrpS                                 | COG0180 | J | 372 | 400 | -28  |
| RCA23_c21480 | 2296952 | 2297626 | hypothetical protein, rhomboid protease                         | COG0705 | R | 167 | 212 | -45  |
| RCA23_c21490 | 2299173 | 2297638 | virulence factor MviN homolog                                   | COG0728 | R | 237 | 404 | -167 |
| RCA23_c21500 | 2301938 | 2299170 | uridylyltransferase GlnD                                        | COG2844 | O | 288 | 413 | -125 |
| RCA23_c21510 | 2303131 | 2301941 | hypothetical protein                                            | COG0683 | E | 173 | 274 | -101 |
| RCA23_c21520 | 2303164 | 2304075 | putative tetrapyrrole methylase                                 | COG0313 | R | 201 | 203 | -2   |
| RCA23_c21530 | 2304080 | 2304448 | hypothetical protein UPF0102                                    | COG0792 | L | 245 | 322 | -77  |
| RCA23_c21540 | 2304547 | 2305485 | glutathione synthase GshB                                       | COG0189 | H | 319 | 394 | -75  |
| RCA23_c21550 | 2306330 | 2305503 | putative esterase/lipase                                        | COG0657 | I | 327 | 376 | -49  |
| RCA23_c21560 | 2306806 | 2306327 | NusB-like protein NusB                                          | COG0781 | K | 272 | 421 | -149 |

|              |         |         |                                                             |         |   |     |     |      |
|--------------|---------|---------|-------------------------------------------------------------|---------|---|-----|-----|------|
| RCA23_c21570 | 2307324 | 2306803 | 6,7-dimethyl-8-ribityllumazine synthase RibH                | COG0054 | H | 240 | 301 | -61  |
| RCA23_c21580 | 2308460 | 2307324 | riboflavin biosynthesis protein RibB                        | COG0108 | H | 374 | 499 | -125 |
| RCA23_c21590 | 2309051 | 2308464 | riboflavin synthase alpha chain RibE                        | COG0307 | H | 371 | 609 | -238 |
| RCA23_c21600 | 2309210 | 2310511 | putative capsule polysaccharide export protein              | COG3562 | M | 318 | 279 | 39   |
| RCA23_c21610 | 2310600 | 2311748 | putative polysaccharide export protein                      | COG1596 | M | 203 | 186 | 17   |
| RCA23_c21620 | 2311750 | 2313762 | putative capsule polysaccharide export protein              | COG3563 | M | 150 | 241 | -91  |
| RCA23_c21630 | 2314853 | 2313759 | riboflavin biosynthesis protein RibD                        | COG0117 | H | 190 | 222 | -32  |
| RCA23_c21640 | 2315317 | 2314850 | transcriptional repressor NrdR                              | COG1327 | K | 348 | 414 | -66  |
| RCA23_c21650 | 2317485 | 2315515 | RNA polymerase sigma factor RpoD                            | COG0568 | K | 608 | 437 | 171  |
| RCA23_c21660 | 2319548 | 2317602 | DNA primase DnaG                                            | COG0358 | L | 355 | 423 | -68  |
| RCA23_c21670 | 2320108 | 2319557 | sarcosine oxidase subunit SoxG                              | COG4583 | E | 231 | 384 | -153 |
| RCA23_c21680 | 2323031 | 2320101 | sarcosine oxidase alpha subunit SoxA                        | COG0404 | E | 196 | 307 | -111 |
| RCA23_c21690 | 2323270 | 2323034 | sarcosine oxidase subunit SoxD                              | COG4311 | E | 308 | 398 | -90  |
| RCA23_c21700 | 2324611 | 2323358 | sarcosine oxidase beta subunit SoxB                         | COG0665 | E | 245 | 350 | -105 |
| RCA23_c21710 | 2325416 | 2324724 | phosphatidylserine decarboxylase proenzyme Psd              | COG0688 | I | 550 | 425 | 125  |
| RCA23_c21720 | 2325810 | 2325421 | diacylglycerol kinase                                       | COG0818 | M | 881 | 641 | 240  |
| RCA23_c21730 | 2327399 | 2325807 | putative sulfatase                                          | COG2194 | R | 919 | 638 | 281  |
| RCA23_c21740 | 2328122 | 2327421 | hypothetical protein, CDP-alcohol phosphatidyltransferase-I | COG1183 | I | 809 | 632 | 177  |
| RCA23_c21750 | 2328718 | 2328254 | hypothetical protein                                        | COG0671 | I | 526 | 430 | 96   |
| RCA23_c21760 | 2329421 | 2328897 | hypothetical protein                                        | COG2194 | R | 558 | 446 | 112  |
| RCA23_c21770 | 2330356 | 2329541 | hypothetical protein, DUF1705                               | COG2194 | R | 624 | 467 | 157  |
| RCA23_c21780 | 2331919 | 2330483 | glutamate dehydrogenase GluD                                | COG0334 | E | 314 | 332 | -18  |
| RCA23_c21790 | 2332495 | 2331998 | hypothetical protein                                        |         |   | 258 | 365 | -107 |
| RCA23_c21800 | 2333529 | 2332585 | 2-hydroxy-3-oxopropionate reductase GarR                    | COG2084 | I | 329 | 359 | -30  |
| RCA23_c21810 | 2333544 | 2334782 | reductive dehalogenase                                      | COG1600 | C | 264 | 315 | -51  |
| RCA23_c21820 | 2334839 | 2335750 | pirin                                                       | COG1741 | R | 430 | 440 | -10  |
| RCA23_c21830 | 2336333 | 2335734 | transcriptional regulator                                   | COG1309 | K | 274 | 419 | -145 |
| RCA23_c21840 | 2336413 | 2336667 | hypothetical protein                                        |         |   | 261 | 359 | -98  |
| RCA23_c21850 | 2336787 | 2338076 | homoserine dehydrogenase Hom                                | COG0460 | E | 298 | 326 | -28  |
| RCA23_c21860 | 2338209 | 2339174 | fructose-1,6-bisphosphatase class II                        | COG1494 | G | 221 | 267 | -46  |



|              |         |         |                                                   |         |   |     |     |      |
|--------------|---------|---------|---------------------------------------------------|---------|---|-----|-----|------|
| RCA23_c21870 | 2339176 | 2340912 | putative single-stranded-DNA-specific exonuclease | COG0608 | L | 211 | 311 | -100 |
| RCA23_c21890 | 2341884 | 2341321 | sulfofpyruvate decarboxylase beta subunit ComE    | COG0028 | E | 560 | 522 | 38   |
| RCA23_c21900 | 2342362 | 2341886 | sulfofpyruvate decarboxylase alpha subunit ComD   | COG4032 | R | 797 | 611 | 186  |
| RCA23_c21910 | 2343377 | 2342394 | zinc-type alcohol dehydrogenase                   | COG1063 | E | 316 | 480 | -164 |
| RCA23_c21920 | 2344144 | 2343386 | gluconate 5-dehydrogenase Gno                     | COG1028 | I | 200 | 301 | -101 |
| RCA23_c21930 | 2345464 | 2344148 | histidinol dehydrogenase HisD                     | COG0141 | E | 306 | 379 | -73  |
| RCA23_c21940 | 2345518 | 2346576 | HTH-type transcriptional regulator, LacI family   | COG1609 | K | 291 | 268 | 23   |
| RCA23_c21950 | 2347369 | 2346614 | HTH-type transcriptional regulator, IclR family   | COG1414 | K | 263 | 354 | -91  |
| RCA23_c21960 | 2347514 | 2349115 | alcohol dehydrogenase AlkJ                        | COG2303 | E | 278 | 286 | -8   |
| RCA23_c21970 | 2349149 | 2349817 | integral membrane protein TerC                    | COG0861 | P | 322 | 278 | 44   |
| RCA23_c21980 | 2349936 | 2351048 | putative TRAP transporter, DctP subunit           | COG4663 | Q | 464 | 312 | 152  |
| RCA23_c21990 | 2351168 | 2353642 | TRAP transporter, DctM/DctQ subunit               | COG4664 | Q | 296 | 253 | 43   |
| RCA23_c22000 | 2355428 | 2353818 | trimethylamine methyltransferase                  | COG5598 | H | 411 | 403 | 8    |
| RCA23_c22010 | 2356156 | 2355458 | putative HAD-family hydrolase                     | COG0546 | R | 278 | 354 | -76  |
| RCA23_c22020 | 2356437 | 2356156 | hypothetical protein                              |         |   | 306 | 534 | -228 |
| RCA23_c22030 | 2356766 | 2356512 | hypothetical protein                              |         |   | 187 | 301 | -114 |
| RCA23_c22040 | 2357079 | 2356789 | hypothetical protein                              |         |   | 143 | 183 | -40  |
| RCA23_c22050 | 2357261 | 2357656 | hypothetical protein                              | COG5349 | S | 172 | 246 | -74  |
| RCA23_c22060 | 2357741 | 2358352 | hypothetical protein, NUDIX hydrolase             | COG0494 | L | 185 | 264 | -79  |
| RCA23_c22070 | 2359231 | 2358332 | hypothetical protein                              |         |   | 240 | 315 | -75  |
| RCA23_c22080 | 2360146 | 2359235 | putative fatty acid desaturase                    | COG3239 | I | 238 | 271 | -33  |
| RCA23_c22090 | 2360233 | 2361102 | putative helix-turn-helix protein                 | COG1396 | K | 271 | 380 | -109 |
| RCA23_c22100 | 2361854 | 2361099 | short chain dehydrogenase                         | COG1028 | I | 199 | 337 | -138 |
| RCA23_c22110 | 2363320 | 2361851 | putative 3-hydroxyacyl-CoA dehydrogenase          | COG1250 | I | 222 | 316 | -94  |
| RCA23_c22130 | 2364364 | 2363357 | hypothetical protein, DUF849                      | COG3246 | S | 198 | 375 | -177 |
| RCA23_c22120 | 2364345 | 2365316 | transcriptional regulator, AraC family            | COG4977 | K | 181 | 300 | -119 |
| RCA23_c22140 | 2366365 | 2365322 | protein Tas                                       | COG0667 | C | 249 | 289 | -40  |
| RCA23_c22150 | 2366465 | 2367088 | hypothetical protein                              | COG4544 | S | 139 | 266 | -127 |
| RCA23_c22160 | 2367182 | 2368417 | putative MFS-type transporter                     | COG2211 | G | 250 | 323 | -73  |
| RCA23_c22170 | 2368475 | 2370187 | methionyl-tRNA synthase MetG                      | COG0143 | J | 246 | 334 | -88  |

|              |         |         |                                                        |         |   |      |       |       |     |
|--------------|---------|---------|--------------------------------------------------------|---------|---|------|-------|-------|-----|
| RCA23_c22190 | 2370689 | 2372218 | integrase                                              |         |   | GI 8 | 337   | 236   | 101 |
| RCA23_c22200 | 2372685 | 2372215 | integrase                                              | COG4974 | L | GI 8 | 417   | 345   | 72  |
| RCA23_c22210 | 2373139 | 2373477 | putative nucleotidyl transferase                       | COG1210 | M | GI 8 | 343   | 199   | 144 |
| RCA23_c22220 | 2375142 | 2374411 | hypothetical protein                                   |         |   | GI 8 | 371   | 226   | 145 |
| RCA23_c22230 | 2375873 | 2375142 | hypothetical protein                                   |         |   | GI 8 | 424   | 250   | 174 |
| RCA23_c22240 | 2376433 | 2375873 | putative replication factor C, small subunit           | COG2256 | L | GI 8 | 578   | 315   | 263 |
| RCA23_c22250 | 2377432 | 2376614 | hypothetical protein                                   |         |   | GI 8 | 378   | 220   | 158 |
| RCA23_c22260 | 2377643 | 2378410 | hypothetical protein                                   |         |   | GI 8 | 363   | 260   | 103 |
| RCA23_c22270 | 2380540 | 2379620 | ParB-like nuclease                                     | COG1475 | K | GI 8 | 484   | 357   | 127 |
| RCA23_c22280 | 2380679 | 2383024 | cadmium-transporting ATPase CadA                       | COG2217 | P | GI 8 | 160   | 160   | 0   |
| RCA23_c22290 | 2383190 | 2383600 | hypothetical protein                                   | COG3034 | S | GI 8 | 193   | 223   | -30 |
| RCA23_c22300 | 2384025 | 2383591 | putative lipoprotein signal peptidase                  | COG0597 | M | GI 8 | 324   | 287   | 37  |
| RCA23_c22310 | 2384826 | 2384065 | putative ZIP zinc transporter                          | COG0428 | P | GI 8 | 206   | 270   | -64 |
| RCA23_c22320 | 2385290 | 2384874 | hypothetical protein DUF411                            | COG3019 | R | GI 8 | 365   | 300   | 65  |
| RCA23_c22330 | 2385943 | 2385320 | SCO-like protein                                       | COG1999 | R | GI 8 | 251   | 222   | 29  |
| RCA23_c22340 | 2386320 | 2385943 | hypothetical protein                                   | COG2847 | S | GI 8 | 208   | 146   | 62  |
| RCA23_c22350 | 2387089 | 2386430 | hypothetical protein                                   | COG1651 | O | GI 8 | 162   | 177   | -15 |
| RCA23_c22360 | 2387511 | 2387086 | hypothetical protein, disulfide bond formation protein | COG1495 | O | GI 8 | 213   | 286   | -73 |
| RCA23_c22370 | 2388080 | 2387508 | SCO-like protein                                       | COG1999 | R | GI 8 | 225   | 229   | -4  |
| RCA23_c22380 | 2388277 | 2388705 | putative HTH-type transcriptional regulator            | COG0789 | K | GI 8 | 204   | 271   | -67 |
| RCA23_c22390 | 2388708 | 2389034 | hypothetical protein UPF0060                           | COG1742 | S | GI 8 | 176   | 169   | 7   |
| RCA23_c22400 | 2389105 | 2389329 | hypothetical protein                                   |         |   | GI 8 | 272   | 193   | 79  |
| RCA23_c22410 | 2390264 | 2389434 | hypothetical protein                                   |         |   | GI 8 | 84    | 88    | -4  |
| RCA23_c22420 | 2392406 | 2391699 | transposase                                            | COG3316 | L | GI 8 | 2     | 3     | -1  |
| RCA23_c22430 | 2393515 | 2392478 | MORN motif precursor                                   | COG4642 | S | GI 8 | 283   | 186   | 97  |
| RCA23_c22440 | 2394592 | 2393885 | transposase                                            | COG3316 | L | GI 8 | 8     | 0     | 8   |
| RCA23_c22450 | 2394953 | 2394711 | hypothetical protein                                   |         |   | GI 8 | 13    | 0     | 13  |
| RCA23_c22460 | 2395528 | 2395211 | hypothetical protein                                   |         |   | GI 8 | 2.261 | 1.424 | 837 |
| RCA23_c22470 | 2396464 | 2395883 | hypothetical protein                                   | COG3295 | S | GI 8 | 42    | 18    | 24  |
| RCA23_c22480 | 2397201 | 2396467 | hypothetical protein                                   |         |   | GI 8 | 64    | 18    | 46  |

|              |         |         |                                                               |         |   |      |     |     |     |
|--------------|---------|---------|---------------------------------------------------------------|---------|---|------|-----|-----|-----|
| RCA23_c22490 | 2397865 | 2397518 | hypothetical protein                                          |         |   | GI 8 | 0   | 0   | 0   |
| RCA23_c22500 | 2398105 | 2398617 | transcriptional regulator, LuxR family                        | COG2197 | T | GI 8 | 24  | 14  | 10  |
| RCA23_c22510 | 2399503 | 2398796 | hypothetical protein                                          | COG3316 | L | GI 8 | 5   | 1   | 4   |
| RCA23_c22520 | 2401019 | 2399598 | hypothetical protein, HTH-type transcriptional regulator, Lux | COG5616 | S | GI 8 | 40  | 75  | -35 |
| RCA23_c22530 | 2401309 | 2402388 | cysteine synthase CysK                                        | COG0031 | E | GI 8 | 64  | 75  | -11 |
| RCA23_c22540 | 2402668 | 2402847 | hypothetical protein                                          |         |   | GI 8 | 137 | 182 | -45 |
| RCA23_c22550 | 2402904 | 2403158 | hypothetical protein                                          |         |   | GI 8 | 135 | 123 | 12  |
| RCA23_c22560 | 2403266 | 2403550 | hypothetical protein                                          |         |   | GI 8 | 150 | 154 | -4  |
| RCA23_c22570 | 2403731 | 2404039 | hypothetical protein                                          |         |   | GI 8 | 67  | 62  | 5   |
| RCA23_c22580 | 2404165 | 2404464 | hypothetical protein                                          | COG5470 | S | GI 8 | 91  | 36  | 55  |
| RCA23_c22590 | 2404900 | 2406312 | coniferyl aldehyde dehydrogenase CalB                         | COG1012 | C | GI 8 | 349 | 196 | 153 |
| RCA23_c22600 | 2407339 | 2406443 | regulatory protein NocR                                       | COG0583 | K | GI 8 | 256 | 176 | 80  |
| RCA23_c22610 | 2407478 | 2408791 | sn-glycerol-3-phosphate-binding periplasmic protein UgpB      | COG1653 | G | GI 8 | 431 | 258 | 173 |
| RCA23_c22620 | 2408867 | 2409748 | sn-glycerol-3-phosphate transport system permease proteir     | COG1175 | G | GI 8 | 568 | 361 | 207 |
| RCA23_c22630 | 2409790 | 2410626 | sn-glycerol-3-phosphate transport system permease proteir     | COG0395 | G | GI 8 | 590 | 318 | 272 |
| RCA23_c22640 | 2410634 | 2411680 | sn-glycerol-3-phosphate import ATP-bindingprotein UgpC        | COG3839 | G | GI 8 | 527 | 263 | 264 |
| RCA23_c22650 | 2411680 | 2412570 | putative glycerophosphoryl diester phosphodiesterase          | COG0584 | C | GI 8 | 368 | 259 | 109 |
| RCA23_c22660 | 2414704 | 2413001 | aerobic glycerol-3-phosphate dehydrogenase GlpD               | COG0578 | C | GI 8 | 212 | 146 | 66  |
| RCA23_c22670 | 2416422 | 2414794 | hypothetical protein, Na <sup>+</sup> /Pi-cotransporter       | COG1283 | P | GI 8 | 144 | 136 | 8   |
| RCA23_c22680 | 2417269 | 2416478 | hypothetical protein, calcineurin-like phosphoesterase-like   | COG1409 | R | GI 8 | 166 | 115 | 51  |
| RCA23_c22690 | 2418075 | 2417266 | ABC transporter permease protein                              | COG0395 | G | GI 8 | 173 | 119 | 54  |
| RCA23_c22700 | 2418965 | 2418072 | ABC transporter permease protein                              | COG1175 | G | GI 8 | 166 | 109 | 57  |
| RCA23_c22710 | 2420318 | 2419050 | ABC transporter extracellular solute-binding protein          | COG1653 | G | GI 8 | 305 | 157 | 148 |
| RCA23_c22720 | 2421380 | 2420382 | ABC transporter ATP-binding protein                           | COG3839 | G | GI 8 | 233 | 135 | 98  |
| RCA23_c22730 | 2422258 | 2421398 | HTH-type transcriptional regulator, DeoR family               | COG1349 | K | GI 8 | 194 | 176 | 18  |
| RCA23_c22740 | 2422599 | 2423399 | HAD-superfamily hydrolase, subfamily IIB                      | COG0561 | R | GI 8 | 192 | 150 | 42  |
| RCA23_c22750 | 2423921 | 2424865 | putative inner membrane transporter                           | COG0697 | G | GI 8 | 285 | 181 | 104 |
| RCA23_c22760 | 2424987 | 2426117 | soluble aldose sugar dehydrogenase YliI                       | COG2133 | G | GI 8 | 223 | 155 | 68  |
| RCA23_c22770 | 2426301 | 2427080 | putative FKBP-type peptidyl-prolyl cis-trans isomerase        | COG0545 | O | GI 8 | 37  | 48  | -11 |
| RCA23_c22780 | 2427117 | 2427665 | putative NnrU family protein                                  | COG4094 | S | GI 8 | 65  | 34  | 31  |

|              |         |         |                                                                     |         |   |      |     |     |     |
|--------------|---------|---------|---------------------------------------------------------------------|---------|---|------|-----|-----|-----|
| RCA23_c22790 | 2428870 | 2429508 | hypothetical protein                                                |         |   | GI 8 | 23  | 19  | 4   |
| RCA23_c22800 | 2429684 | 2430973 | putative adenine methyltransferase                                  | COG0863 | L | GI 8 | 71  | 54  | 17  |
| RCA23_c22810 | 2430970 | 2431335 | hypothetical protein                                                |         |   | GI 8 | 33  | 23  | 10  |
| RCA23_c22820 | 2431343 | 2432776 | phage uncharacterised protein                                       | COG5410 | S | GI 8 | 38  | 24  | 14  |
| RCA23_c22830 | 2433238 | 2434899 | hypothetical protein, resolvase-like                                | COG1961 | L | GI 8 | 34  | 19  | 15  |
| RCA23_c22840 | 2435361 | 2436626 | putative prophage integrase                                         | COG0582 | L | GI 8 | 0   | 3   | -3  |
| RCA23_c22850 | 2436623 | 2437081 | hypothetical protein, putative phage-like protein                   |         |   | GI 8 | 0   | 0   | 0   |
| RCA23_c22860 | 2437153 | 2437380 | hypothetical protein                                                | COG3311 | K | GI 8 | 15  | 3   | 12  |
| RCA23_c22870 | 2437482 | 2437922 | hypothetical protein                                                |         |   | GI 8 | 3   | 3   | 0   |
| RCA23_c22880 | 2438000 | 2439085 | hypothetical protein                                                |         |   | GI 8 | 85  | 61  | 24  |
| RCA23_c22890 | 2439085 | 2440413 | DNA polymerase III                                                  | COG5545 | R | GI 8 | 168 | 114 | 54  |
| RCA23_c22900 | 2440954 | 2441754 | hypothetical protein, periplasmic binding protein-like              | COG2998 | H | GI 8 | 14  | 7   | 7   |
| RCA23_c22910 | 2441772 | 2441930 | hypothetical protein                                                |         |   | GI 8 | 126 | 134 | -8  |
| RCA23_c22920 | 2442714 | 2442007 | transposase                                                         | COG3316 | L | GI 8 | 1   | 0   | 1   |
| RCA23_c22930 | 2444420 | 2443158 | molybdopterin biosynthesis protein MoeA                             | COG0303 | H | GI 8 | 53  | 66  | -13 |
| RCA23_c22940 | 2444914 | 2444417 | molybdopterin-guanine dinucleotide biosynthesis protein MoeB        | COG1763 | H | GI 8 | 82  | 88  | -6  |
| RCA23_c22950 | 2445231 | 2444911 | hypothetical protein, MobA-like                                     | COG0746 | H | GI 8 | 207 | 166 | 41  |
| RCA23_c22960 | 2446280 | 2445228 | formate dehydrogenase family accessory protein FdhD                 | COG1526 | C | GI 8 | 171 | 128 | 43  |
| RCA23_c22970 | 2447181 | 2446738 | molybdopterin-converting factor subunit MoeE                        | COG0314 | H | GI 8 | 65  | 59  | 6   |
| RCA23_c22980 | 2447430 | 2447185 | molybdopterin-converting factor subunit MoeD                        | COG1977 | H | GI 8 | 163 | 66  | 97  |
| RCA23_c22990 | 2448117 | 2447674 | transposase                                                         | COG3328 | L | GI 8 | 158 | 124 | 34  |
| RCA23_c23000 | 2449773 | 2448766 | molybdenum cofactor biosynthesis protein MoeA                       | COG2896 | H | GI 8 | 105 | 125 | -20 |
| RCA23_c23010 | 2450390 | 2450662 | transposase                                                         |         |   | GI 8 | 163 | 189 | -26 |
| RCA23_c23020 | 2451451 | 2450738 | ABC transporter, ATP-binding cassette protein                       | COG3839 | G | GI 8 | 113 | 81  | 32  |
| RCA23_c23030 | 2452152 | 2451448 | ABC transporter, permease protein                                   | COG4662 | H | GI 8 | 107 | 61  | 46  |
| RCA23_c23040 | 2453771 | 2452395 | formate dehydrogenase, gamma subunit FdhI                           | COG2864 | C | GI 8 | 213 | 101 | 112 |
| RCA23_c23050 | 2454447 | 2453854 | formate dehydrogenase, iron-sulfur subunit FdhB                     | COG0437 | C | GI 8 | 155 | 92  | 63  |
| RCA23_c23060 | 2457355 | 2454461 | formate dehydrogenase alpha subunit FdhA                            | COG0243 | C | GI 8 | 116 | 75  | 41  |
| RCA23_c23070 | 2457663 | 2457472 | putative twin-arginine translocation pathway signal sequence domain |         |   | GI 8 | 62  | 49  | 13  |
| RCA23_c23080 | 2458323 | 2457718 | hypothetical protein, cytoplasmic chaperon TorD                     | COG3381 | R | GI 8 | 126 | 84  | 42  |

|              |         |         |                                                                    |         |   |      |     |     |     |
|--------------|---------|---------|--------------------------------------------------------------------|---------|---|------|-----|-----|-----|
| RCA23_c23090 | 2458949 | 2458320 | hypothetical protein                                               |         |   | GI 8 | 196 | 135 | 61  |
| RCA23_c23100 | 2459476 | 2458946 | putative molybdopterin-guanine dinucleotide biosynthesis protein A |         |   | GI 8 | 117 | 86  | 31  |
| RCA23_c23110 | 2459807 | 2461798 | hypothetical protein, 4Fe-4S ferredoxin-like                       | COG1148 | C | GI 8 | 51  | 69  | -18 |
| RCA23_c23120 | 2462517 | 2461792 | hypothetical protein                                               |         |   | GI 8 | 81  | 65  | 16  |
| RCA23_c23130 | 2462613 | 2462804 | hypothetical protein                                               |         |   | GI 8 | 89  | 131 | -42 |
| RCA23_c23140 | 2462805 | 2463860 | hypothetical protein, Mrp/NBP35 family protein                     | COG0489 | D | GI 8 | 86  | 65  | 21  |
| RCA23_c23150 | 2463857 | 2464570 | hypothetical protein                                               | COG0340 | H | GI 8 | 67  | 78  | -11 |
| RCA23_c23160 | 2464572 | 2465081 | hypothetical protein                                               |         |   | GI 8 | 92  | 92  | 0   |
| RCA23_c23170 | 2466057 | 2465644 | putative phage terminase                                           |         |   | GI 8 | 15  | 22  | -7  |
| RCA23_c23180 | 2467057 | 2466350 | transposase                                                        | COG3316 | L | GI 8 | 1   | 1   | 0   |
| RCA23_c23190 | 2467131 | 2467988 | putative phage helicase                                            | COG3378 | R | GI 8 | 70  | 48  | 22  |
| RCA23_c23200 | 2468581 | 2468237 | hypothetical protein                                               |         |   | GI 8 | 73  | 97  | -24 |
| RCA23_c23210 | 2468997 | 2470031 | putative pyridoxal 4-dehydrogenase                                 | COG0667 | C | GI 8 | 57  | 17  | 40  |
| RCA23_c23220 | 2470845 | 2470078 | 2-dehydro-3-deoxy-D-gluconate 5-dehydrogenase KduD                 | COG1028 | I | GI 8 | 75  | 17  | 58  |
| RCA23_c23230 | 2471994 | 2470855 | putative L-rhamnonate dehydratase rhamD                            | COG4948 | M | GI 8 | 64  | 17  | 47  |
| RCA23_c23240 | 2472826 | 2471987 | ureidoglycolate lyase                                              | COG0179 | Q | GI 8 | 90  | 30  | 60  |
| RCA23_c23250 | 2473812 | 2472823 | D-3-phosphoglycerate dehydrogenase                                 | COG1052 | C | GI 8 | 68  | 18  | 50  |
| RCA23_c23260 | 2474558 | 2473809 | uncharacterized oxidoreductase                                     | COG1028 | I | GI 8 | 35  | 19  | 16  |
| RCA23_c23270 | 2474872 | 2474555 | putative rhamnose mutarotase RhaM                                  | COG3254 | S | GI 8 | 51  | 30  | 21  |
| RCA23_c23280 | 2475636 | 2474872 | putative acetoacetate decarboxylase Adc                            | COG4689 | Q | GI 8 | 88  | 30  | 58  |
| RCA23_c23290 | 2476659 | 2475637 | uncharacterized oxidoreductase                                     | COG0673 | R | GI 8 | 77  | 19  | 58  |
| RCA23_c23300 | 2477416 | 2476673 | transcriptional regulator, GntR family                             | COG2186 | K | GI 8 | 81  | 23  | 58  |
| RCA23_c23310 | 2478408 | 2477413 | putative ribose ABC transport system, permease protein Rb          | COG1172 | G | GI 8 | 111 | 41  | 70  |
| RCA23_c23320 | 2479472 | 2478405 | putative ribose ABC transport system, permease protein Rb          | COG1172 | G | GI 8 | 87  | 30  | 57  |
| RCA23_c23330 | 2480980 | 2479472 | ribose import ABC transporter, ATP-binding protein RbsA            | COG1129 | G | GI 8 | 68  | 26  | 42  |
| RCA23_c23340 | 2482093 | 2481056 | putative rhamnose ABC transport system, substrate-binding          | COG1879 | G | GI 8 | 47  | 36  | 11  |
| RCA23_c23350 | 2482310 | 2483446 | galactonate dehydratase                                            | COG4948 | M | GI 8 | 46  | 19  | 27  |
| RCA23_c23360 | 2483461 | 2484276 | xylose isomerase-like                                              | COG1082 | G | GI 8 | 66  | 19  | 47  |
| RCA23_c23370 | 2484419 | 2484691 | putative aldo/keto reductase                                       | COG0667 | C | GI 8 | 56  | 23  | 33  |
| RCA23_c23380 | 2484851 | 2485741 | amidohydrolase                                                     | COG3618 | R | GI 8 | 75  | 36  | 39  |

|              |         |         |                                                             |         |   |      |    |    |     |
|--------------|---------|---------|-------------------------------------------------------------|---------|---|------|----|----|-----|
| RCA23_c23390 | 2486071 | 2486280 | hypothetical protein                                        |         |   | GI 8 | 58 | 21 | 37  |
| RCA23_c23400 | 2487635 | 2486928 | transposase                                                 | COG3316 | L | GI 8 | 31 | 25 | 6   |
| RCA23_c23410 | 2488060 | 2487743 | L-rhamnose mutarotase RhaM                                  | COG3254 | S | GI 8 | 80 | 22 | 58  |
| RCA23_c23420 | 2489347 | 2488439 | ureidoglycolate lyase                                       | COG0179 | Q | GI 8 | 23 | 20 | 3   |
| RCA23_c23430 | 2490360 | 2489458 | dihydrodipicolinate synthase DapA                           | COG0329 | E | GI 8 | 43 | 31 | 12  |
| RCA23_c23440 | 2491404 | 2490508 | amidohydrolase                                              | COG3618 | R | GI 8 | 67 | 20 | 47  |
| RCA23_c23450 | 2492228 | 2491446 | 3-ketoacyl-(acyl-carrier-protein) reductase FabG            | COG1028 | I | GI 8 | 85 | 52 | 33  |
| RCA23_c23460 | 2493559 | 2492393 | L-rhamnonate dehydratase RhmD                               | COG4948 | M | GI 8 | 28 | 27 | 1   |
| RCA23_c23470 | 2494711 | 2493587 | polyamine ABC transporter, ATP-binding protein PotA         | COG3842 | E | GI 8 | 14 | 8  | 6   |
| RCA23_c23480 | 2495571 | 2494786 | polyamine ABC transporter, permease protein                 | COG1177 | E | GI 8 | 22 | 19 | 3   |
| RCA23_c23490 | 2496561 | 2495575 | polyamine ABC transporter, permease protein                 | COG1176 | E | GI 8 | 21 | 7  | 14  |
| RCA23_c23500 | 2497743 | 2496676 | polyamine ABC transporter, substrate binding protein        | COG0687 | E | GI 8 | 13 | 9  | 4   |
| RCA23_c23510 | 2498385 | 2498131 | hypothetical protein                                        |         |   | GI 8 | 21 | 11 | 10  |
| RCA23_c23520 | 2498724 | 2498401 | hypothetical protein                                        |         |   | GI 8 | 12 | 4  | 8   |
| RCA23_c23530 | 2499506 | 2498760 | uncharacterized oxidoreductase                              | COG1028 | I | GI 8 | 31 | 16 | 15  |
| RCA23_c23540 | 2500818 | 2499526 | L-rhamnonate dehydratase                                    | COG4948 | M | GI 8 | 25 | 20 | 5   |
| RCA23_c23550 | 2501838 | 2500861 | ribose ABC transport system, permease protein RbsC          | COG1172 | G | GI 8 | 5  | 21 | -16 |
| RCA23_c23560 | 2502656 | 2501835 | ribose import ABC transporter, ATP-binding protein RbsA     | COG1129 | G | GI 8 | 17 | 16 | 1   |
| RCA23_c23570 | 2503752 | 2502640 | ribose import ABC transporter, substrate binding protein Rb | COG1879 | G | GI 8 | 14 | 13 | 1   |
| RCA23_c23580 | 2503924 | 2504961 | HTH-type transcriptional regulator, GntR family             | COG1609 | K | GI 8 | 18 | 19 | -1  |
| RCA23_c23590 | 2505104 | 2505304 | hypothetical protein                                        | COG3311 | K | GI 8 | 39 | 9  | 30  |
| RCA23_c23600 | 2506163 | 2506816 | putative DNA-binding protein                                | COG1396 | K | GI 8 | 29 | 12 | 17  |
| RCA23_c23610 | 2507367 | 2508263 | glutamine amidotransferase-like protein GlxB                | COG0067 | E | GI 8 | 41 | 12 | 29  |
| RCA23_c23620 | 2508265 | 2508942 | glutamate synthase alpha subunit GlxC                       | COG0070 | E | GI 8 | 20 | 3  | 17  |
| RCA23_c23630 | 2508954 | 2510294 | glutamate synthase large subunit GlxD                       | COG0069 | E | GI 8 | 18 | 6  | 12  |
| RCA23_c23640 | 2510364 | 2511698 | glutamine synthase GlnA type III                            | COG0174 | E | GI 8 | 17 | 8  | 9   |
| RCA23_c23650 | 2512409 | 2513053 | hypothetical protein                                        |         |   | GI 8 | 48 | 23 | 25  |
| RCA23_c23660 | 2513221 | 2514510 | methyltransferase                                           | COG0863 | L | GI 8 | 66 | 37 | 29  |
| RCA23_c23670 | 2514507 | 2514890 | hypothetical protein                                        |         |   | GI 8 | 38 | 17 | 21  |
| RCA23_c23680 | 2514880 | 2516313 | putative terminase, large subunit                           | COG5410 | S | GI 8 | 31 | 15 | 16  |

|              |         |         |                                                            |         |   |      |       |     |      |
|--------------|---------|---------|------------------------------------------------------------|---------|---|------|-------|-----|------|
| RCA23_c23690 | 2516395 | 2516823 | hypothetical protein, DUF2924                              |         |   | GI 8 | 42    | 22  | 20   |
| RCA23_c23700 | 2516820 | 2518436 | hypothetical protein, resolvase-like                       | COG1961 | L | GI 8 | 19    | 21  | -2   |
| RCA23_c23720 | 2520249 | 2518873 | signal transduction histidine kinase                       | COG0642 | T |      | 324   | 351 | -27  |
| RCA23_c23730 | 2521684 | 2520269 | mercuric reductase MerA                                    | COG1249 | C |      | 253   | 349 | -96  |
| RCA23_c23740 | 2522418 | 2521687 | hypothetical protein                                       | COG0398 | S |      | 532   | 524 | 8    |
| RCA23_c23750 | 2522803 | 2523192 | putative ribonuclease P                                    | COG0594 | J |      | 226   | 280 | -54  |
| RCA23_c23760 | 2523189 | 2523428 | hypothetical protein DUF37                                 | COG0759 | S |      | 269   | 308 | -39  |
| RCA23_c23770 | 2523749 | 2523964 | hypothetical protein                                       |         |   |      | 216   | 397 | -181 |
| RCA23_c23780 | 2524020 | 2524874 | tRNA 2-thiocytidine biosynthesis protein TtcA              | COG0037 | D |      | 246   | 264 | -18  |
| RCA23_c23790 | 2524928 | 2525959 | putative diguanylate phosphodiesterase                     | COG2200 | T |      | 373   | 385 | -12  |
| RCA23_c23800 | 2526067 | 2527851 | inner membrane protein OxaA                                | COG0706 | U |      | 371   | 367 | 4    |
| RCA23_c23810 | 2527853 | 2528602 | hypothetical protein, molybdenum cofactor sulfurase        | COG3217 | R |      | 301   | 323 | -22  |
| RCA23_c23820 | 2528599 | 2529249 | putative GTP-binding protein EngB                          | COG0218 | R |      | 261   | 317 | -56  |
| RCA23_c23830 | 2529343 | 2530209 | acetylglutamate kinase ArgB                                | COG0548 | E |      | 288   | 298 | -10  |
| RCA23_c23840 | 2530224 | 2531015 | putative fatty acid hydroxylase                            | COG3000 | I |      | 407   | 521 | -114 |
| RCA23_c23850 | 2531012 | 2531632 | hypothetical protein                                       | COG1148 | C |      | 236   | 288 | -52  |
| RCA23_c23860 | 2531644 | 2532126 | hypothetical protein, phosphoglycerate mutase              | COG2062 | T |      | 239   | 338 | -99  |
| RCA23_c23870 | 2532914 | 2532150 | glutamate/glutamine/aspartate/asparagine transport ATP-bi  | COG1126 | E |      | 530   | 458 | 72   |
| RCA23_c23880 | 2534220 | 2532928 | glutamate/glutamine/aspartate/asparagine transport system  | COG0765 | E |      | 785   | 600 | 185  |
| RCA23_c23890 | 2535391 | 2534222 | glutamate/glutamine/aspartate/asparagine transport system  | COG4597 | E |      | 312   | 250 | 62   |
| RCA23_c23900 | 2536594 | 2535548 | glutamate/glutamine/aspartate/asparagine-binding protein E | COG0834 | E |      | 743   | 471 | 272  |
| RCA23_c23910 | 2537482 | 2536778 | ATP chaperone protein                                      | COG5387 | O |      | 326   | 440 | -114 |
| RCA23_c23920 | 2538147 | 2537479 | putative phosphoglycerate phosphatase                      | COG0546 | R |      | 309   | 416 | -107 |
| RCA23_c23930 | 2539190 | 2538144 | ribosomal large subunit pseudouridine synthase C           | COG0564 | J |      | 228   | 289 | -61  |
| RCA23_c23940 | 2539558 | 2539181 | putative ccrb-like protein                                 | COG0239 | D |      | 321   | 383 | -62  |
| RCA23_c23950 | 2540903 | 2539590 | replication-associated recombination protein A             | COG2256 | L |      | 230   | 384 | -154 |
| RCA23_c23960 | 2541581 | 2540970 | HTH-type transcriptional regulator, LuxR family            | COG2197 | T |      | 227   | 315 | -88  |
| RCA23_c23970 | 2542163 | 2541810 | 50S ribosomal protein L17                                  | COG0203 | J |      | 383   | 328 | 55   |
| RCA23_c23980 | 2543490 | 2542336 | DNA-directed RNA polymerase alpha subunit RpoA             | COG0202 | K |      | 941   | 507 | 434  |
| RCA23_c23990 | 2543849 | 2543460 | 30S ribosomal protein S11                                  | COG0100 | J |      | 1.196 | 675 | 521  |

|              |         |         |                                                      |         |   |       |     |      |
|--------------|---------|---------|------------------------------------------------------|---------|---|-------|-----|------|
| RCA23_c24000 | 2544228 | 2543860 | 30S ribosomal protein S13                            | COG0099 | J | 1.607 | 755 | 852  |
| RCA23_c24010 | 2545048 | 2544407 | adenylate kinase Adk                                 | COG0563 | F | 470   | 419 | 51   |
| RCA23_c24020 | 2546403 | 2545045 | preprotein translocase subunit SecY                  | COG0201 | U | 515   | 462 | 53   |
| RCA23_c24030 | 2546975 | 2546508 | 50S ribosomal protein L15                            | COG0200 | J | 648   | 387 | 261  |
| RCA23_c24040 | 2547397 | 2547209 | 50S ribosomal protein L30                            | COG1841 | J | 495   | 458 | 37   |
| RCA23_c24050 | 2548008 | 2547409 | 30S ribosomal protein S5                             | COG0098 | J | 562   | 385 | 177  |
| RCA23_c24060 | 2548445 | 2548086 | 50S ribosomal protein L18                            | COG0256 | J | 613   | 407 | 206  |
| RCA23_c24070 | 2548990 | 2548457 | 50S ribosomal protein L6                             | COG0097 | J | 960   | 459 | 501  |
| RCA23_c24080 | 2549392 | 2549000 | 30S ribosomal protein S8                             | COG0096 | J | 851   | 363 | 488  |
| RCA23_c24090 | 2549710 | 2549405 | 30S ribosomal protein S14                            | COG0199 | J | 1.103 | 430 | 673  |
| RCA23_c24100 | 2550282 | 2549722 | 50S ribosomal protein L5                             | COG0094 | J | 1.295 | 531 | 764  |
| RCA23_c24110 | 2550587 | 2550282 | 50S ribosomal protein L24                            | COG0198 | J | 1.045 | 441 | 604  |
| RCA23_c24120 | 2550957 | 2550589 | 50S ribosomal protein L14                            | COG0093 | J | 1.214 | 626 | 588  |
| RCA23_c24130 | 2551255 | 2551025 | 30S ribosomal protein S17                            | COG0186 | J | 1.128 | 542 | 586  |
| RCA23_c24140 | 2551467 | 2551261 | 50S ribosomal protein L29                            | COG0255 | J | 919   | 575 | 344  |
| RCA23_c24150 | 2551692 | 2552312 | hypothetical protein                                 |         |   | 491   | 514 | -23  |
| RCA23_c24160 | 2552703 | 2552407 | 50S ribosomal protein L23                            | COG0089 | J | 913   | 531 | 382  |
| RCA23_c24170 | 2553317 | 2552700 | 50S ribosomal protein L4                             | COG0088 | J | 843   | 572 | 271  |
| RCA23_c24180 | 2554045 | 2553314 | 50S ribosomal protein L3                             | COG0087 | J | 919   | 565 | 354  |
| RCA23_c24190 | 2554368 | 2554060 | 30S ribosomal protein S10                            | COG0051 | J | 561   | 460 | 101  |
| RCA23_c24200 | 2555649 | 2554474 | elongation factor Tu (EF-Tu)                         | COG0050 | J | 41    | 15  | 26   |
| RCA23_c24210 | 2557851 | 2555734 | elongation factor FusA                               | COG0480 | J | 997   | 541 | 456  |
| RCA23_c24220 | 2558343 | 2557873 | 30S ribosomal protein S7                             | COG0049 | J | 558   | 374 | 184  |
| RCA23_c24230 | 2558583 | 2558356 | 30S ribosomal protein S12                            | COG0048 | J | 966   | 883 | 83   |
| RCA23_c24240 | 2559706 | 2559092 | hypothetical protein                                 | COG1072 | H | 197   | 222 | -25  |
| RCA23_c24250 | 2560443 | 2559703 | ABC transporter ATP-binding protein                  | COG1129 | G | 377   | 332 | 45   |
| RCA23_c24260 | 2561552 | 2560479 | ABC transporter permease protein                     | COG1172 | G | 316   | 328 | -12  |
| RCA23_c24270 | 2562676 | 2561672 | putative ABC transporter periplasmic binding protein | COG1879 | G | 376   | 304 | 72   |
| RCA23_c24280 | 2562858 | 2564048 | putative transcriptional repressor                   | COG1940 | K | 257   | 274 | -17  |
| RCA23_c24290 | 2564800 | 2564060 | hypothetical protein, acyl-CoA thioesterase-like     | COG2755 | E | 330   | 432 | -102 |



|              |         |         |                                                              |         |   |     |     |      |
|--------------|---------|---------|--------------------------------------------------------------|---------|---|-----|-----|------|
| RCA23_c24300 | 2564921 | 2565451 | ABC transporter ATP-binding protein                          | COG1136 | V | 271 | 378 | -107 |
| RCA23_c24310 | 2565448 | 2567970 | putative ABC transporter permease protein                    | COG3127 | Q | 212 | 276 | -64  |
| RCA23_c24320 | 2568328 | 2569251 | hypothetical protein, glycosyl transferase family 2          | COG0463 | M | 218 | 237 | -19  |
| RCA23_c24330 | 2570639 | 2569266 | aminotransferase class-III                                   | COG0161 | H | 358 | 316 | 42   |
| RCA23_c24340 | 2571879 | 2570683 | putative ectoine utilization protein EutD                    | COG0006 | E | 406 | 426 | -20  |
| RCA23_c24350 | 2572018 | 2572968 | putative integral membrane protein DUF6                      |         |   | 260 | 386 | -126 |
| RCA23_c24360 | 2573067 | 2574635 | 4-coumarate--CoA ligase                                      | COG0318 | I | 229 | 302 | -73  |
| RCA23_c24370 | 2575672 | 2574737 | hypothetical protein                                         | COG0679 | R | 315 | 415 | -100 |
| RCA23_c24380 | 2576572 | 2575760 | hypothetical protein DUF125                                  | COG1814 | S | 191 | 301 | -110 |
| RCA23_c24390 | 2577015 | 2576587 | transcriptional regulator, AsnC family                       | COG1522 | K | 269 | 276 | -7   |
| RCA23_c24400 | 2577133 | 2578062 | arginase ArcA                                                | COG0010 | E | 294 | 304 | -10  |
| RCA23_c24410 | 2578064 | 2579122 | ornithine cyclodeaminase ArcB                                | COG2423 | E | 294 | 233 | 61   |
| RCA23_c24420 | 2579119 | 2582481 | bifunctional protein PutA                                    | COG4230 | C | 254 | 302 | -48  |
| RCA23_c24430 | 2583144 | 2582581 | hypothetical protein                                         |         |   | 459 | 415 | 44   |
| RCA23_c24440 | 2583406 | 2583128 | hypothetical protein                                         |         |   | 349 | 222 | 127  |
| RCA23_c24460 | 2583863 | 2583615 | hypothetical protein                                         |         |   | 249 | 201 | 48   |
| RCA23_c24450 | 2583834 | 2585051 | creatinase                                                   | COG0006 | E | 209 | 197 | 12   |
| RCA23_c24470 | 2585998 | 2585276 | putative hydrolase                                           | COG0596 | R | 44  | 43  | 1    |
| RCA23_c24480 | 2587548 | 2585995 | glycine betaine/L-proline transport system permease protein  | COG4176 | E | 108 | 62  | 46   |
| RCA23_c24490 | 2588600 | 2587545 | glycine betaine/L-proline transport ATP-binding protein ProX | COG4175 | E | 112 | 59  | 53   |
| RCA23_c24500 | 2589635 | 2588670 | glycine betaine-binding periplasmic protein ProX             | COG2113 | E | 102 | 46  | 56   |
| RCA23_c24510 | 2589879 | 2590763 | putative HTH-type transcriptional regulator, LysR family     | COG0583 | K | 244 | 166 | 78   |
| RCA23_c24520 | 2591855 | 2590770 | D-cysteine desulfhydrase DcyD                                | COG2515 | E | 285 | 248 | 37   |
| RCA23_c24530 | 2591995 | 2592351 | hypothetical protein                                         |         |   | 794 | 435 | 359  |
| RCA23_c24540 | 2593298 | 2592375 | high-affinity zinc uptake system protein ZnuA                | COG4531 | P | 270 | 294 | -24  |
| RCA23_c24550 | 2593355 | 2593870 | zinc uptake regulator                                        | COG0735 | P | 213 | 353 | -140 |
| RCA23_c24560 | 2593867 | 2594616 | zinc import ATP-binding protein ZnuC                         | COG1121 | P | 361 | 352 | 9    |
| RCA23_c24570 | 2594616 | 2595410 | high-affinity zinc uptake system membrane protein ZnuB       | COG1108 | P | 234 | 351 | -117 |
| RCA23_c24580 | 2595534 | 2597435 | 4-hydroxyphenylpyruvate dioxygenase Hpd                      | COG3185 | E | 358 | 304 | 54   |
| RCA23_c24590 | 2598436 | 2598104 | hypothetical protein                                         |         |   | 626 | 538 | 88   |

|              |         |         |                                                              |         |   |      |     |     |     |
|--------------|---------|---------|--------------------------------------------------------------|---------|---|------|-----|-----|-----|
| RCA23_c24600 | 2598748 | 2598503 | hypothetical protein                                         |         |   | GI 9 | 0   | 3   | -3  |
| RCA23_c24610 | 2599041 | 2599844 | hypothetical protein                                         | COG1028 | I | GI 9 | 169 | 138 | 31  |
| RCA23_c24620 | 2599863 | 2600606 | hypothetical protein                                         | COG1402 | R | GI 9 | 102 | 95  | 7   |
| RCA23_c24630 | 2601568 | 2600642 | putative gluconolactonase                                    | COG3386 | G | GI 9 | 198 | 166 | 32  |
| RCA23_c24640 | 2602967 | 2602047 | ribokinase RbsK                                              | COG0524 | G | GI 9 | 266 | 185 | 81  |
| RCA23_c24650 | 2603416 | 2602964 | ribose ABC transporter protein RbsD                          | COG4154 | G | GI 9 | 233 | 166 | 67  |
| RCA23_c24660 | 2604556 | 2603489 | putative ribose ABC transporter, ATP-binding protein RbsA    | COG3839 | G | GI 9 | 298 | 217 | 81  |
| RCA23_c24670 | 2604859 | 2606439 | putative ribose ABC transporter, substrate binding protein F | COG1653 | G | GI 9 | 236 | 184 | 52  |
| RCA23_c24680 | 2606509 | 2607615 | putative ribose ABC transporter, permease protein RbsC       | COG1175 | G | GI 9 | 314 | 141 | 173 |
| RCA23_c24690 | 2607617 | 2608534 | putative ribose ABC transporter, permease protein RbsC       | COG0395 | G | GI 9 | 231 | 152 | 79  |
| RCA23_c24700 | 2610024 | 2608537 | hypothetical protein, L-fucose isomerase-like                |         |   | GI 9 | 155 | 137 | 18  |
| RCA23_c24710 | 2610626 | 2610162 | sugar isomerase                                              | COG0794 | M | GI 9 | 162 | 121 | 41  |
| RCA23_c24720 | 2612206 | 2610716 | xylulose kinase XylB                                         | COG1070 | G | GI 9 | 199 | 157 | 42  |
| RCA23_c24730 | 2613273 | 2612203 | aminopeptidase SgcX                                          | COG1363 | G | GI 9 | 223 | 193 | 30  |
| RCA23_c24740 | 2614073 | 2613270 | photosystem I biogenesis protein BtpA                        | COG0434 | R | GI 9 | 253 | 182 | 71  |
| RCA23_c24750 | 2614166 | 2615188 | pyridoxal 4-dehydrogenase Pld                                | COG0667 | C | GI 9 | 294 | 224 | 70  |
| RCA23_c24760 | 2615185 | 2616021 | putative amidohydrolase                                      | COG3618 | R | GI 9 | 205 | 195 | 10  |
| RCA23_c24770 | 2616791 | 2616009 | putative carbohydrate kinase, pfkB family                    | COG0524 | G | GI 9 | 131 | 162 | -31 |
| RCA23_c24780 | 2617753 | 2616854 | xylose isomerase family protein                              | COG4952 | M | GI 9 | 185 | 163 | 22  |
| RCA23_c24790 | 2618529 | 2617822 | putative HTH-type transcriptional regulator, GntR family     | COG1802 | K | GI 9 | 254 | 163 | 91  |
| RCA23_c24800 | 2620064 | 2618739 | mandelate racemase/muconate lactonizing enzyme               | COG4948 | M | GI 9 | 222 | 159 | 63  |
| RCA23_c24810 | 2620722 | 2621792 | fatty acid desaturase                                        | COG3239 | I | GI 9 | 209 | 154 | 55  |
| RCA23_c24820 | 2622254 | 2621892 | hypothetical protein                                         |         |   | GI 9 | 16  | 5   | 11  |
| RCA23_c24830 | 2623076 | 2622369 | transposase                                                  | COG3316 | L | GI 9 | 43  | 27  | 16  |
| RCA23_c24840 | 2624076 | 2623558 | transporter, LysE family                                     | COG1280 | E | GI 9 | 0   | 1   | -1  |
| RCA23_c24850 | 2624531 | 2624851 | hypothetical protein                                         |         |   | GI 9 | 26  | 35  | -9  |
| RCA23_c24860 | 2625998 | 2624925 | putative transporter, periplasmic binding protein            | COG2358 | R | GI 9 | 8   | 1   | 7   |
| RCA23_c24870 | 2626948 | 2627676 | ribitol 2-dehydrogenase RbtD                                 | COG4221 | R | GI 9 | 50  | 26  | 24  |
| RCA23_c24880 | 2631855 | 2628631 | hypothetical protein                                         |         |   | GI 9 | 26  | 16  | 10  |
| RCA23_c24890 | 2631920 | 2634466 | UDP-N-acetylglucosamine--peptide N-acetylglucosaminyltra     | COG0457 | R | GI 9 | 52  | 46  | 6   |

|              |         |         |                                                            |         |   |      |     |     |      |
|--------------|---------|---------|------------------------------------------------------------|---------|---|------|-----|-----|------|
| RCA23_c24900 | 2636319 | 2635342 | putative phage integrase                                   | COG4974 | L | GI 9 | 100 | 70  | 30   |
| RCA23_c24920 | 2636842 | 2638131 | D-alanyl-D-alanine carboxypeptidase DacC                   | COG1686 | M |      | 251 | 324 | -73  |
| RCA23_c24930 | 2638132 | 2638746 | thymidylate kinase Tmk                                     | COG0125 | F |      | 197 | 301 | -104 |
| RCA23_c24940 | 2638743 | 2639867 | hypothetical protein, DNA polymerase III delta subunit     | COG2812 | L |      | 192 | 277 | -85  |
| RCA23_c24950 | 2639864 | 2640652 | TatD family deoxyribonuclease                              | COG0084 | L |      | 240 | 435 | -195 |
| RCA23_c24960 | 2640649 | 2641437 | hypothetical protein, metallo-beta-lactamase               | COG1235 | R |      | 292 | 403 | -111 |
| RCA23_c24970 | 2641439 | 2642368 | membrane transport protein                                 | COG0679 | R |      | 307 | 401 | -94  |
| RCA23_c24980 | 2643457 | 2642372 | FAD dependent oxidoreductase                               | COG0665 | E |      | 183 | 305 | -122 |
| RCA23_c24990 | 2643645 | 2645834 | UvrABC system protein B                                    | COG0556 | L |      | 246 | 358 | -112 |
| RCA23_c25000 | 2647627 | 2645909 | hypothetical protein                                       |         |   |      | 553 | 485 | 68   |
| RCA23_c25010 | 2648247 | 2647642 | hypothetical protein                                       |         |   |      | 444 | 381 | 63   |
| RCA23_c25020 | 2648732 | 2648331 | hypothetical protein                                       |         |   |      | 640 | 595 | 45   |
| RCA23_c25030 | 2650370 | 2648796 | lysyl-tRNA synthase LysS                                   | COG1384 | J |      | 506 | 461 | 45   |
| RCA23_c25040 | 2650510 | 2650884 | hypothetical protein                                       |         |   |      | 359 | 434 | -75  |
| RCA23_c25050 | 2652333 | 2650876 | putative D-Ala-D-Ala carboxypeptidase 3 (S13) family prote | COG2027 | M |      | 272 | 431 | -159 |
| RCA23_c25060 | 2652562 | 2653368 | hypothetical protein                                       |         |   |      | 240 | 271 | -31  |
| RCA23_c25070 | 2653967 | 2653365 | nicotinic acid mononucleotide adenylyltransferase NadD     | COG1057 | H |      | 207 | 270 | -63  |
| RCA23_c25080 | 2654128 | 2655756 | ABC transporter, ATP-binding cassette protein, ChvD family | COG0488 | R |      | 488 | 465 | 23   |
| RCA23_c25090 | 2655999 | 2656205 | cold shock protein CspA                                    | COG1278 | K |      | 304 | 373 | -69  |
| RCA23_c25100 | 2657646 | 2656327 | glutamyl-tRNA synthase 1                                   | COG0008 | J |      | 276 | 321 | -45  |
| RCA23_c25110 | 2659351 | 2657714 | glutamine-dependent NAD(+) synthase NadE                   | COG0171 | H |      | 286 | 411 | -125 |
| RCA23_c25120 | 2659555 | 2660997 | putative phosphatidylinositol-4-phosphate 5-kinase         | COG4642 | S |      | 504 | 467 | 37   |
| RCA23_c25130 | 2661772 | 2661011 | hypothetical protein                                       | COG1028 | I |      | 216 | 333 | -117 |
| RCA23_c25140 | 2661935 | 2663500 | 2-isopropylmalate synthase LeuA                            | COG0119 | E |      | 392 | 420 | -28  |
| RCA23_c25150 | 2663641 | 2664678 | rod shape-determining protein MreB                         | COG1077 | D |      | 324 | 359 | -35  |
| RCA23_c25160 | 2664709 | 2665593 | rod shape-determining protein MreC                         | COG1792 | M |      | 222 | 292 | -70  |
| RCA23_c25170 | 2665590 | 2666129 | hypothetical protein                                       |         |   |      | 310 | 423 | -113 |
| RCA23_c25180 | 2666126 | 2668078 | penicillin-binding protein 2                               | COG0768 | M |      | 309 | 352 | -43  |
| RCA23_c25190 | 2668075 | 2669226 | rod shape-determining protein RodA                         | COG0772 | D |      | 498 | 483 | 15   |
| RCA23_c25200 | 2669223 | 2670152 | glyoxylate/hydroxypyruvate reductase GhrA                  | COG0111 | H |      | 293 | 472 | -179 |

|              |         |         |                                                             |         |   |     |     |      |
|--------------|---------|---------|-------------------------------------------------------------|---------|---|-----|-----|------|
| RCA23_c25210 | 2670938 | 2670162 | hypothetical protein                                        |         |   | 226 | 269 | -43  |
| RCA23_c25220 | 2671545 | 2670925 | hypothetical protein                                        | COG1573 | L | 248 | 272 | -24  |
| RCA23_c25230 | 2671592 | 2672890 | Na <sup>+</sup> /H <sup>+</sup> antiporter NhaA             | COG3004 | P | 338 | 391 | -53  |
| RCA23_c25240 | 2673062 | 2673721 | capsule polysaccharide export protein KpsT                  | COG1134 | G | 568 | 561 | 7    |
| RCA23_c25250 | 2673699 | 2675342 | capsule polysaccharide export protein KpsE                  | COG3524 | M | 361 | 359 | 2    |
| RCA23_c25270 | 2675994 | 2675545 | hypothetical protein                                        | COG1832 | R | 412 | 456 | -44  |
| RCA23_c25280 | 2676353 | 2675997 | ferredoxin PetF                                             | COG0633 | C | 421 | 371 | 50   |
| RCA23_c25290 | 2677702 | 2676350 | selenium binding protein                                    |         |   | 596 | 556 | 40   |
| RCA23_c25300 | 2679228 | 2677789 | aldehyde dehydrogenase                                      | COG1012 | C | 264 | 321 | -57  |
| RCA23_c25310 | 2680435 | 2679296 | CoA-transferase family III protein involved in DMSP degrad. | COG1804 | C | 268 | 406 | -138 |
| RCA23_c25320 | 2680698 | 2681036 | nitrogen regulatory protein P-II 2                          | COG0347 | E | 654 | 505 | 149  |
| RCA23_c25330 | 2681036 | 2682373 | ammonium transporter                                        | COG0004 | P | 507 | 419 | 88   |
| RCA23_c25340 | 2682887 | 2682426 | homoprotocatechuate degradative operon repressor            | COG1846 | K | 311 | 282 | 29   |
| RCA23_c25350 | 2683007 | 2684515 | 5-carboxymethyl-2-hydroxymuconic semialdehyde dehydrog      | COG1012 | C | 402 | 427 | -25  |
| RCA23_c25360 | 2684539 | 2685522 | 3,4-dihydroxyphenylacetate 2,3-dioxygenase HpaD             | COG0346 | E | 355 | 344 | 11   |
| RCA23_c25370 | 2686538 | 2685534 | 3-carboxy-cis,cis-muconate cycloisomerase PcaB              | COG0015 | F | 222 | 260 | -38  |
| RCA23_c25380 | 2687377 | 2686535 | hypothetical protein DUF849                                 | COG3246 | S | 286 | 319 | -33  |
| RCA23_c25390 | 2687930 | 2687370 | protocatechuate 3,4-dioxygenase alpha chain PcaG            | COG3485 | Q | 216 | 313 | -97  |
| RCA23_c25400 | 2688658 | 2687930 | protocatechuate 3,4-dioxygenase beta chain PcaH             | COG3485 | Q | 172 | 217 | -45  |
| RCA23_c25410 | 2689041 | 2688655 | 4-carboxymuconolactone decarboxylase PcaC                   | COG0599 | S | 193 | 228 | -35  |
| RCA23_c25420 | 2689451 | 2689260 | hypothetical protein                                        |         |   | 343 | 373 | -30  |
| RCA23_c25430 | 2689498 | 2690184 | transcriptional regulatory protein                          | COG0745 | T | 365 | 418 | -53  |
| RCA23_c25440 | 2690190 | 2691731 | two component signal transduction histidine kinase ChvG     | COG0642 | T | 479 | 455 | 24   |
| RCA23_c25450 | 2691980 | 2691744 | hypothetical protein                                        |         |   | 545 | 451 | 94   |
| RCA23_c25460 | 2694029 | 2692536 | Na <sup>(+)</sup> -phosphate symporter Pit                  | COG0306 | P | 375 | 421 | -46  |
| RCA23_c25470 | 2694422 | 2694246 | hypothetical protein                                        |         |   | 625 | 496 | 129  |
| RCA23_c25480 | 2695336 | 2694491 | 2-dehydro-3-deoxyphosphooctonate aldolase KdsA              | COG2877 | M | 308 | 347 | -39  |
| RCA23_c25490 | 2695480 | 2696481 | arabinose 5-phosphate isomerase KdsD                        | COG0794 | M | 281 | 328 | -47  |
| RCA23_c25500 | 2697297 | 2696491 | 3-deoxy-manno-octulosonate cytidyltransferase KdsB          | COG1212 | M | 476 | 394 | 82   |
| RCA23_c25510 | 2698445 | 2697384 | hypothetical protein                                        |         |   | 122 | 146 | -24  |

|              |         |         |                                                            |         |   |       |     |      |
|--------------|---------|---------|------------------------------------------------------------|---------|---|-------|-----|------|
| RCA23_c25520 | 2703372 | 2698459 | bacterial surface protein                                  |         |   | 86    | 44  | 42   |
| RCA23_c25530 | 2703948 | 2706137 | catalase-peroxidase KatG                                   | COG0376 | P | 267   | 267 | 0    |
| RCA23_c25540 | 2706353 | 2707432 | hypothetical protein                                       | COG2067 | I | 134   | 138 | -4   |
| RCA23_c25550 | 2707908 | 2707480 | thioesterase/thiol ester dehydrase-isomerase               | COG0824 | R | 50    | 135 | -85  |
| RCA23_c25560 | 2709059 | 2707905 | iron-containing alcohol dehydrogenase                      | COG1454 | C | 136   | 190 | -54  |
| RCA23_c25570 | 2710310 | 2709075 | hypothetical protein                                       | COG1960 | I | 224   | 359 | -135 |
| RCA23_c25580 | 2710403 | 2710906 | nodulation protein N-like protein                          | COG2030 | I | 274   | 303 | -29  |
| RCA23_c25590 | 2710903 | 2711943 | putative phosphotransferase, eukaryotic acyl-CoA dehydrog  | COG3173 | R | 286   | 369 | -83  |
| RCA23_c25600 | 2711940 | 2712548 | putative HTH-type transcriptional regulator, TetR family   | COG1309 | K | 280   | 365 | -85  |
| RCA23_c25610 | 2712623 | 2714713 | fatty acid oxidation complex alpha subunit FadJ            | COG1250 | I | 230   | 283 | -53  |
| RCA23_c25620 | 2714718 | 2715914 | acyl-CoA dehydrogenase                                     | COG1960 | I | 529   | 366 | 163  |
| RCA23_c25630 | 2715918 | 2717012 | acyl-CoA dehydrogenase                                     | COG1960 | I | 266   | 245 | 21   |
| RCA23_c25640 | 2717231 | 2717998 | hypothetical protein, MarR family                          |         |   | 285   | 270 | 15   |
| RCA23_c25650 | 2718086 | 2719246 | acyl-CoA dehydrogenase                                     | COG1960 | I | 495   | 432 | 63   |
| RCA23_c25660 | 2720282 | 2719305 | quinone oxidoreductase (1.6.5.5.)                          | COG0604 | C | 467   | 472 | -5   |
| RCA23_c25670 | 2720400 | 2720990 | hypothetical protein                                       |         |   | 218   | 348 | -130 |
| RCA23_c25680 | 2721719 | 2720952 | putative DNA repair protein RecO                           | COG1381 | L | 297   | 529 | -232 |
| RCA23_c25690 | 2722155 | 2721823 | hypothetical protein                                       | COG5447 | S | 328   | 366 | -38  |
| RCA23_c25700 | 2723060 | 2722152 | GTP-binding protein Era                                    | COG1159 | R | 435   | 524 | -89  |
| RCA23_c25710 | 2723740 | 2723057 | ribonuclease 3                                             | COG0571 | K | 271   | 398 | -127 |
| RCA23_c25720 | 2724636 | 2723767 | signal peptidase I                                         | COG0681 | U | 348   | 422 | -74  |
| RCA23_c25730 | 2725101 | 2724688 | holo-[acyl-carrier-protein] synthase AcpS                  | COG0736 | I | 188   | 392 | -204 |
| RCA23_c25740 | 2725841 | 2725098 | pyridoxine 5'-phosphate synthase PdxJ                      | COG0854 | H | 284   | 320 | -36  |
| RCA23_c25750 | 2726515 | 2725865 | hypothetical protein DUF2062                               | COG3216 | S | 343   | 410 | -67  |
| RCA23_c25760 | 2728673 | 2726508 | guanosine-3',5'-bis(diphosphate) 3'-pyrophosphohydrolase   | COG0317 | T | 439   | 454 | -15  |
| RCA23_c25770 | 2729039 | 2728686 | DNA-directed RNA polymerase subunit omega                  | COG1758 | K | 1.123 | 669 | 454  |
| RCA23_c25780 | 2729719 | 2729135 | putative 2-amino-4-hydroxy-6-hydroxymethylidihydropteridin | COG0801 | H | 399   | 370 | 29   |
| RCA23_c25790 | 2729822 | 2730388 | hypothetical protein DUF88                                 | COG1432 | S | 663   | 386 | 277  |
| RCA23_c25800 | 2730453 | 2731418 | 4-hydroxy-3-methylbut-2-enyl diphosphate reductase lspH    | COG0761 | I | 269   | 305 | -36  |
| RCA23_c25810 | 2731411 | 2731998 | hypothetical protein, methyltransferase                    | COG2227 | H | 203   | 289 | -86  |

|              |         |         |                                                              |         |   |       |     |      |
|--------------|---------|---------|--------------------------------------------------------------|---------|---|-------|-----|------|
| RCA23_c25820 | 2731991 | 2732443 | ribonuclease H                                               | COG0328 | L | 255   | 386 | -131 |
| RCA23_c25830 | 2732467 | 2732703 | hypothetical protein                                         |         |   | 262   | 428 | -166 |
| RCA23_c25840 | 2733584 | 2732700 | methionyl-tRNA formyltransferase Fmt                         | COG0223 | J | 177   | 313 | -136 |
| RCA23_c25850 | 2734084 | 2733590 | peptide deformylase Def                                      | COG0242 | J | 298   | 457 | -159 |
| RCA23_c25860 | 2734710 | 2734081 | peptide deformylase Def                                      | COG0242 | J | 400   | 459 | -59  |
| RCA23_c25870 | 2734743 | 2735909 | aminotransferase                                             | COG1168 | E | 342   | 372 | -30  |
| RCA23_c25880 | 2736272 | 2735922 | hypothetical protein                                         |         |   | 315   | 306 | 9    |
| RCA23_c25890 | 2737133 | 2736360 | precorrin-4 C(11)-methyltransferase CobM                     | COG2875 | H | 269   | 297 | -28  |
| RCA23_c25900 | 2738971 | 2737130 | precorrin-3B C(17)-methyltransferase CobJ                    | COG1010 | H | 190   | 309 | -119 |
| RCA23_c25910 | 2739663 | 2738962 | precorrin-2 C(20)-methyltransferase Cobl                     | COG2243 | H | 215   | 381 | -166 |
| RCA23_c25920 | 2740859 | 2739660 | precorrin-6Y C(5,15)-methyltransferase CobL                  | COG2242 | H | 190   | 368 | -178 |
| RCA23_c25930 | 2741494 | 2740856 | precorrin-8X methylmutase CobH                               | COG2082 | H | 243   | 357 | -114 |
| RCA23_c25940 | 2742653 | 2741541 | sirohydrochlorin cobaltochelataase CbiX                      | COG2138 | S | 330   | 408 | -78  |
| RCA23_c25950 | 2743257 | 2744771 | methyltransferase, FkbM family                               | COG3774 | M | 151   | 145 | 6    |
| RCA23_c25960 | 2744880 | 2745842 | hypothetical protein, glutathione S-transferase              | COG0435 | O | 555   | 486 | 69   |
| RCA23_c25970 | 2745920 | 2746291 | hypothetical protein DUF1636                                 | COG5469 | S | 250   | 284 | -34  |
| RCA23_c25980 | 2746291 | 2747238 | threonine-phosphate decarboxylase CobC                       | COG0079 | E | 212   | 334 | -122 |
| RCA23_c25990 | 2747235 | 2748140 | cobalamin biosynthesis protein CobD                          | COG1270 | H | 288   | 321 | -33  |
| RCA23_c26000 | 2748210 | 2749349 | putative peptidoglycan-binding lytic murein transglycosylase | COG2951 | M | 269   | 370 | -101 |
| RCA23_c26010 | 2752960 | 2749505 | putative chromosome partition protein smc                    | COG1196 | D | 238   | 324 | -86  |
| RCA23_c26020 | 2753354 | 2753145 | hypothetical protein                                         |         |   | 402   | 371 | 31   |
| RCA23_c26030 | 2753524 | 2754378 | hypothetical protein                                         | COG1028 | I | 304   | 334 | -30  |
| RCA23_c26040 | 2754434 | 2755204 | hypothetical protein DUF81                                   | COG0730 | R | 615   | 430 | 185  |
| RCA23_c26050 | 2755268 | 2756272 | 50S ribosomal protein L2                                     | COG0090 | J | 670   | 458 | 212  |
| RCA23_c26060 | 2756318 | 2756554 | 30S ribosomal protein S19                                    | COG0185 | J | 875   | 505 | 370  |
| RCA23_c26070 | 2756558 | 2756938 | 50S ribosomal protein L22                                    | COG0091 | J | 1.115 | 598 | 517  |
| RCA23_c26080 | 2756938 | 2757657 | 30S ribosomal protein S3                                     | COG0092 | J | 748   | 364 | 384  |
| RCA23_c26090 | 2757702 | 2758082 | 50S ribosomal protein L16                                    | COG0197 | J | 391   | 269 | 122  |
| RCA23_c26100 | 2758763 | 2758521 | hypothetical protein                                         |         |   | 525   | 482 | 43   |
| RCA23_c26120 | 2760596 | 2759328 | hypothetical protein                                         | COG0666 | R | 10    | 9   | 1    |

|              |         |         |                                                          |         |   |       |     |     |     |
|--------------|---------|---------|----------------------------------------------------------|---------|---|-------|-----|-----|-----|
| RCA23_c26130 | 2761026 | 2760724 | transcriptional regulator                                |         |   | GI 10 | 245 | 94  | 151 |
| RCA23_c26140 | 2761304 | 2761564 | hypothetical protein                                     |         |   | GI 10 | 158 | 107 | 51  |
| RCA23_c26150 | 2762158 | 2761697 | hypothetical protein, UPF0311                            |         |   | GI 10 | 298 | 163 | 135 |
| RCA23_c26160 | 2762238 | 2762687 | transcriptional regulator, MarR family                   | COG1846 | K | GI 10 | 324 | 211 | 113 |
| RCA23_c26170 | 2762756 | 2764528 | long-chain-fatty-acid-CoA-ligase                         | COG0318 | I | GI 10 | 171 | 159 | 12  |
| RCA23_c26180 | 2765853 | 2764525 | TRAP dicarboxylate transporter, subunit DctM             | COG1593 | G | GI 10 | 163 | 218 | -55 |
| RCA23_c26190 | 2766366 | 2765854 | TRAP dicarboxylate transporter, subunit DctQ             |         |   | GI 10 | 225 | 194 | 31  |
| RCA23_c26200 | 2767464 | 2766427 | TRAP dicarboxylate transporter, subunit DctP             | COG1638 | G | GI 10 | 171 | 138 | 33  |
| RCA23_c26210 | 2768296 | 2767511 | 3-hydroxybutyryl-CoA dehydratase Crt                     | COG1024 | I | GI 10 | 128 | 207 | -79 |
| RCA23_c26220 | 2768372 | 2769280 | metal-dependent hydrolase                                | COG2159 | R | GI 10 | 381 | 230 | 151 |
| RCA23_c26230 | 2769438 | 2770715 | FAD dependent monooxygenase                              | COG0654 | H | GI 10 | 204 | 180 | 24  |
| RCA23_c26240 | 2772437 | 2770791 | arylsulfatase                                            | COG3119 | P | GI 10 | 137 | 165 | -28 |
| RCA23_c26250 | 2772940 | 2772434 | transcriptional regulator, MarR family                   | COG1846 | K | GI 10 | 149 | 189 | -40 |
| RCA23_c26260 | 2773067 | 2774122 | putative transporter, periplasmic binding protein        | COG2358 | R | GI 10 | 113 | 141 | -28 |
| RCA23_c26270 | 2774186 | 2776480 | TRAP transporter, 4TM/12TM fusion protein                | COG4666 | R | GI 10 | 256 | 221 | 35  |
| RCA23_c26280 | 2778081 | 2776852 | hypothetical protein, UPF0261                            | COG5441 | S | GI 10 | 500 | 428 | 72  |
| RCA23_c26290 | 2779513 | 2778236 | gamma-glutamylputrescine synthase PuuA                   | COG0174 | E | GI 10 | 493 | 386 | 107 |
| RCA23_c26300 | 2780750 | 2779515 | cytochrome P450                                          | COG2124 | Q | GI 10 | 546 | 377 | 169 |
| RCA23_c26310 | 2781471 | 2780740 | glutamine amidotransferase class-I                       | COG0518 | F | GI 10 | 630 | 421 | 209 |
| RCA23_c26320 | 2782504 | 2781536 | tripartite tricarboxylate transporter (TTT) protein TctC | COG3181 | S | GI 10 | 491 | 360 | 131 |
| RCA23_c26330 | 2783997 | 2782504 | tripartite tricarboxylate transporter (TTT) protein TctA | COG3333 | S | GI 10 | 471 | 384 | 87  |
| RCA23_c26340 | 2784742 | 2784008 | hypothetical protein, transmembrane                      |         |   | GI 10 | 794 | 831 | -37 |
| RCA23_c26350 | 2786274 | 2784739 | gamma-glutamyl-gamma-aminobutyraldehyde dehydrogenase    | COG1012 | C | GI 10 | 526 | 374 | 152 |
| RCA23_c26360 | 2786992 | 2787321 | hypothetical protein                                     |         |   | GI 10 | 20  | 18  | 2   |
| RCA23_c26370 | 2787569 | 2787901 | hypothetical protein                                     |         |   | GI 10 | 52  | 13  | 39  |
| RCA23_c26380 | 2787903 | 2788388 | hypothetical protein                                     |         |   | GI 10 | 18  | 11  | 7   |
| RCA23_c26390 | 2789043 | 2790062 | putative fucosyltransferase                              |         |   | GI 10 | 54  | 41  | 13  |
| RCA23_c26400 | 2790398 | 2790138 | integrase                                                | COG2801 | L | GI 10 | 156 | 153 | 3   |
| RCA23_c26410 | 2791528 | 2790497 | putative extracellular solute-binding protein            | COG1840 | P | GI 10 | 271 | 192 | 79  |
| RCA23_c26420 | 2792889 | 2791498 | two-component system, sensor histidine kinase protein    | COG0642 | T | GI 10 | 137 | 118 | 19  |

|              |         |         |                                                               |         |   |       |       |     |      |
|--------------|---------|---------|---------------------------------------------------------------|---------|---|-------|-------|-----|------|
| RCA23_c26430 | 2793554 | 2792886 | two-component system, response regulator protein              | COG0745 | T | GI 10 | 214   | 156 | 58   |
| RCA23_c26440 | 2793656 | 2794624 | tripartite tricarboxylate transporter (TTT) protein TctC      | COG3181 | S | GI 10 | 713   | 468 | 245  |
| RCA23_c26450 | 2794624 | 2795112 | tripartite tricarboxylate transporter (TTT) protein TctB      |         |   | GI 10 | 634   | 402 | 232  |
| RCA23_c26460 | 2795114 | 2796619 | tripartite tricarboxylate transporter (TTT) protein TctA      | COG3333 | S | GI 10 | 592   | 369 | 223  |
| RCA23_c26470 | 2796621 | 2797979 | hypothetical protein                                          |         |   | GI 10 | 474   | 353 | 121  |
| RCA23_c26480 | 2797972 | 2798277 | hypothetical protein                                          |         |   | GI 10 | 592   | 419 | 173  |
| RCA23_c26490 | 2798419 | 2798775 | transposase A                                                 |         |   | GI 10 | 341   | 254 | 87   |
| RCA23_c26510 | 2799713 | 2799357 | hypothetical protein                                          |         |   | GI 10 | 1     | 0   | 1    |
| RCA23_c26520 | 2800934 | 2801293 | hypothetical protein                                          | COG1709 | K | GI 10 | 0     | 4   | -4   |
| RCA23_c26530 | 2802543 | 2802343 | hypothetical protein                                          |         |   | GI 10 | 0     | 0   | 0    |
| RCA23_c26540 | 2806319 | 2802786 | putative RTX toxin and hemolysin-type calcium binding protein |         |   | GI 10 | 1     | 2   | -1   |
| RCA23_c26550 | 2809639 | 2806427 | putative RTX toxin and hemolysin-type calcium binding protein |         |   | GI 10 | 89    | 22  | 67   |
| RCA23_c26560 | 2809943 | 2811319 | type I secretion outer membrane protein, TolC family          | COG1538 | M | GI 10 | 267   | 163 | 104  |
| RCA23_c26570 | 2811316 | 2813484 | type I secretion system ATP-binding component                 | COG2274 | V | GI 10 | 378   | 289 | 89   |
| RCA23_c26580 | 2813500 | 2814810 | type I RTX secretion system membrane fusion protein, HlyC     | COG1566 | V | GI 10 | 493   | 289 | 204  |
| RCA23_c26590 | 2814853 | 2815215 | hypothetical protein                                          |         |   | GI 10 | 680   | 516 | 164  |
| RCA23_c26600 | 2815394 | 2815645 | hypothetical protein                                          |         |   | GI 10 | 1.043 | 506 | 537  |
| RCA23_c26610 | 2815655 | 2815879 | hypothetical protein                                          |         |   | GI 10 | 1.033 | 554 | 479  |
| RCA23_c26620 | 2815898 | 2816089 | hypothetical protein                                          |         |   | GI 10 | 1.041 | 460 | 581  |
| RCA23_c26630 | 2816211 | 2817194 | hypothetical protein DUF2125                                  |         |   | GI 10 | 666   | 361 | 305  |
| RCA23_c26640 | 2817683 | 2818480 | Asp/Glu racemase                                              | COG3473 | Q | GI 10 | 500   | 349 | 151  |
| RCA23_c26650 | 2818577 | 2819731 | cystathionine beta-lyase                                      | COG0626 | E | GI 10 | 549   | 536 | 13   |
| RCA23_c26660 | 2820022 | 2821635 | deoxyribodipyrimidine photo-lyase PhrB                        | COG0415 | L | GI 10 | 921   | 514 | 407  |
| RCA23_c26670 | 2821821 | 2822804 | hypothetical protein                                          | COG3380 | R | GI 10 | 564   | 376 | 188  |
| RCA23_c26680 | 2823798 | 2822806 | O-sialoglycoprotein endopeptidase Gcp                         | COG0533 | O | GI 10 | 284   | 330 | -46  |
| RCA23_c26690 | 2824420 | 2823791 | Sua5/YciO/YrdC/YwlC family protein                            | COG0009 | J | GI 10 | 299   | 317 | -18  |
| RCA23_c26700 | 2825070 | 2824417 | putative glycoprotease family protein                         | COG1214 | O | GI 10 | 294   | 484 | -190 |
| RCA23_c26710 | 2825579 | 2825061 | hypothetical protein UPF0079                                  | COG0802 | R | GI 10 | 267   | 388 | -121 |
| RCA23_c26720 | 2825795 | 2826562 | xylose isomerase family protein                               | COG3622 | G | GI 10 | 264   | 388 | -124 |
| RCA23_c26730 | 2826823 | 2828073 | putative phage integrase                                      | COG0582 | L | GI 10 | 171   | 127 | 44   |



|              |         |         |                                                                         |         |   |       |     |     |     |
|--------------|---------|---------|-------------------------------------------------------------------------|---------|---|-------|-----|-----|-----|
| RCA23_c26740 | 2828066 | 2828713 | hypothetical protein                                                    |         |   | GI 10 | 240 | 116 | 124 |
| RCA23_c26750 | 2828793 | 2828993 | putative prophage regulatory protein                                    | COG3311 | K | GI 10 | 75  | 92  | -17 |
| RCA23_c26760 | 2828990 | 2829565 | hypothetical protein                                                    |         |   | GI 10 | 99  | 70  | 29  |
| RCA23_c26770 | 2829691 | 2831313 | DNA polymerase                                                          | COG0749 | L | GI 10 | 144 | 96  | 48  |
| RCA23_c26780 | 2832293 | 2831898 | hypothetical protein                                                    |         |   | GI 10 | 65  | 51  | 14  |
| RCA23_c26790 | 2833890 | 2832826 | hypothetical protein, snoaL-like polyketide cyclase                     | COG5485 | R | GI 10 | 73  | 81  | -8  |
| RCA23_c26800 | 2834472 | 2834092 | hypothetical protein                                                    |         |   | GI 10 | 105 | 69  | 36  |
| RCA23_c26810 | 2834841 | 2834566 | glyoxalase/bleomycin resistance protein/dioxygenase superfamily protein |         |   | GI 10 | 58  | 114 | -56 |
| RCA23_c26820 | 2835971 | 2834964 | hypothetical protein                                                    |         |   | GI 10 | 55  | 74  | -19 |
| RCA23_c26830 | 2836859 | 2835975 | putative ABC transporter permease protein                               | COG0395 | G | GI 10 | 92  | 82  | 10  |
| RCA23_c26840 | 2837837 | 2836863 | putative ABC transporter permease protein                               | COG1175 | G | GI 10 | 79  | 120 | -41 |
| RCA23_c26850 | 2839229 | 2837985 | putative ABC transporter extracellular solute binding protein           | COG1653 | G | GI 10 | 74  | 71  | 3   |
| RCA23_c26860 | 2839509 | 2840555 | ABC transporter ATP-binding protein                                     | COG3839 | G | GI 10 | 64  | 75  | -11 |
| RCA23_c26870 | 2840606 | 2841937 | histidinol dehydrogenase HisD                                           | COG0141 | E | GI 10 | 55  | 65  | -10 |
| RCA23_c26880 | 2841934 | 2842959 | hypothetical protein, snoaL-like polyketide cyclase                     | COG5485 | R | GI 10 | 39  | 67  | -28 |
| RCA23_c26890 | 2842980 | 2843720 | short chain dehydrogenase                                               | COG1028 | I | GI 10 | 32  | 52  | -20 |
| RCA23_c26900 | 2843720 | 2844733 | putative HTH-type transcriptional regulator LacI family                 | COG1609 | K | GI 10 | 46  | 72  | -26 |
| RCA23_c26910 | 2844730 | 2845731 | hypothetical protein, snoaL-like polyketide cyclase                     |         |   | GI 10 | 44  | 75  | -31 |
| RCA23_c26920 | 2845728 | 2846693 | hypothetical protein                                                    |         |   | GI 10 | 58  | 93  | -35 |
| RCA23_c26930 | 2846826 | 2847896 | hypothetical protein, 2-hydroxypropyl-CoM lyase-like                    | COG0620 | E | GI 10 | 53  | 79  | -26 |
| RCA23_c26940 | 2847893 | 2848561 | hypothetical protein, alpha/beta hydrolase-like                         | COG0596 | R | GI 10 | 80  | 90  | -10 |
| RCA23_c26950 | 2848567 | 2849259 | hypothetical protein                                                    | COG0684 | H | GI 10 | 49  | 85  | -36 |
| RCA23_c26960 | 2850269 | 2851174 | 3-hydroxyisobutyrate dehydrogenase MmsB                                 | COG2084 | I | GI 10 | 171 | 236 | -65 |
| RCA23_c26970 | 2851171 | 2852874 | dihydroxy-acid dehydratase llvD                                         | COG0129 | E | GI 10 | 91  | 124 | -33 |
| RCA23_c26980 | 2852884 | 2854224 | hypothetical protein                                                    | COG4091 | E | GI 10 | 80  | 132 | -52 |
| RCA23_c26990 | 2854264 | 2855901 | putative choline (or alcohol) dehydrogenase                             | COG2303 | E | GI 10 | 82  | 154 | -72 |
| RCA23_c27000 | 2855926 | 2857404 | aldehyde dehydrogenase                                                  | COG1012 | C | GI 10 | 132 | 164 | -32 |
| RCA23_c27010 | 2858020 | 2857418 | transporter, LysE family                                                | COG1280 | E | GI 10 | 78  | 82  | -4  |
| RCA23_c27020 | 2859546 | 2858080 | TRAP dicarboxylate transporter, subunit DctM                            | COG4664 | Q | GI 10 | 186 | 208 | -22 |
| RCA23_c27030 | 2860109 | 2859546 | TRAP dicarboxylate transporter, subunit DctQ                            | COG4665 | Q | GI 10 | 193 | 194 | -1  |

|              |         |         |                                                          |         |   |       |       |     |      |
|--------------|---------|---------|----------------------------------------------------------|---------|---|-------|-------|-----|------|
| RCA23_c27040 | 2861235 | 2860195 | TRAP dicarboxylate transporter, subunit DctP             | COG4663 | Q | GI 10 | 219   | 154 | 65   |
| RCA23_c27050 | 2862106 | 2861444 | transcriptional regulator, LysR family                   | COG0583 | K | GI 10 | 265   | 258 | 7    |
| RCA23_c27060 | 2864132 | 2863029 | mandelate racemase/muconate lactonizing enzyme           | COG4948 | M | GI 10 | 75    | 142 | -67  |
| RCA23_c27070 | 2865241 | 2864129 | Zn-dependant oxidoreductase                              | COG0604 | C | GI 10 | 72    | 182 | -110 |
| RCA23_c27090 | 2866870 | 2865992 | HTH-type transcriptional regulator, LysR family          | COG0583 | K | GI 10 | 109   | 112 | -3   |
| RCA23_c27100 | 2866984 | 2867739 | class II aldolase                                        | COG0235 | G | GI 10 | 127   | 145 | -18  |
| RCA23_c27110 | 2867742 | 2868770 | fatty acid desaturase                                    | COG3239 | I | GI 10 | 59    | 122 | -63  |
| RCA23_c27120 | 2868772 | 2869620 | 3-methyl-2-oxobutanoate hydroxymethyltransferase PanB    | COG0413 | H | GI 10 | 113   | 150 | -37  |
| RCA23_c27130 | 2869651 | 2869959 | putative rieske [2Fe-2S] protein                         | COG2146 | P | GI 10 | 181   | 173 | 8    |
| RCA23_c27150 | 2871527 | 2870697 | hypothetical protein                                     | COG1396 | K |       | 597   | 445 | 152  |
| RCA23_c27160 | 2872169 | 2873122 | arginase family protein                                  | COG0010 | E |       | 371   | 394 | -23  |
| RCA23_c27170 | 2873972 | 2873130 | hypothetical protein                                     | COG1082 | G |       | 609   | 538 | 71   |
| RCA23_c27180 | 2874311 | 2875399 | putative HTH-type transcriptional regulator, AraC family | COG2169 | F |       | 277   | 286 | -9   |
| RCA23_c27190 | 2876347 | 2875367 | hypothetical protein. fatty acid desaturase              | COG3239 | I |       | 497   | 509 | -12  |
| RCA23_c27200 | 2878323 | 2876440 | AMP-dependent synthase / ligase                          | COG0318 | I |       | 392   | 482 | -90  |
| RCA23_c27210 | 2880212 | 2878422 | ABC transporter ATP-binding protein                      | COG1132 | V |       | 279   | 330 | -51  |
| RCA23_c27220 | 2880650 | 2881150 | spore coat family protein                                |         |   |       | 310   | 326 | -16  |
| RCA23_c27230 | 2881370 | 2882092 | PapD-like chaperone involved in fimbrial biogenesis      | COG3121 | N |       | 313   | 228 | 85   |
| RCA23_c27240 | 2882279 | 2884033 | fimbrial biogenesis outer membrane usher protein         | COG3188 | N |       | 235   | 333 | -98  |
| RCA23_c27250 | 2884043 | 2884906 | fimbrial biogenesis outer membrane usher protein         | COG3188 | N |       | 320   | 412 | -92  |
| RCA23_c27260 | 2885061 | 2885357 | hypothetical protein                                     |         |   |       | 275   | 288 | -13  |
| RCA23_c27280 | 2886473 | 2885598 | hypothetical protein                                     | COG0697 | G |       | 437   | 532 | -95  |
| RCA23_c27290 | 2890851 | 2886601 | DNA-directed RNA polymerase beta subunit RpoC            | COG0086 | K |       | 605   | 404 | 201  |
| RCA23_c27300 | 2895044 | 2890911 | DNA-directed RNA polymerase beta subunit RpoB            | COG0085 | K |       | 596   | 421 | 175  |
| RCA23_c27310 | 2895693 | 2895316 | 50S ribosomal protein L7/L12                             | COG0222 | J |       | 1.149 | 666 | 483  |
| RCA23_c27320 | 2896250 | 2895762 | 50S ribosomal protein L10                                | COG0244 | J |       | 1.251 | 786 | 465  |
| RCA23_c27330 | 2897346 | 2896648 | 50S ribosomal protein L1                                 | COG0081 | J |       | 541   | 451 | 90   |
| RCA23_c27340 | 2897821 | 2897348 | 50S ribosomal protein L11                                | COG0080 | J |       | 723   | 502 | 221  |
| RCA23_c27350 | 2898476 | 2897928 | transcription antitermination protein NusG               | COG0250 | K |       | 711   | 380 | 331  |
| RCA23_c27360 | 2898893 | 2898627 | preprotein translocase, subunit SecE                     | COG0690 | U |       | 366   | 293 | 73   |

|              |         |         |                                                        |         |   |     |     |      |
|--------------|---------|---------|--------------------------------------------------------|---------|---|-----|-----|------|
| RCA23_c27370 | 2899800 | 2898895 | hypothetical protein                                   |         |   | 315 | 334 | -19  |
| RCA23_c27430 | 2905830 | 2905985 | hypothetical protein                                   |         |   | 433 | 427 | 6    |
| RCA23_c27440 | 2906449 | 2906021 | hypothetical protein, transmembrane                    |         |   | 477 | 559 | -82  |
| RCA23_c27450 | 2907137 | 2906511 | hypothetical protein                                   |         |   | 166 | 344 | -178 |
| RCA23_c27460 | 2908720 | 2907134 | putative acetolactate synthase isozyme 1 large subunit | COG0028 | E | 255 | 334 | -79  |
| RCA23_c27470 | 2910168 | 2908720 | putative cation transporter                            | COG0168 | P | 535 | 514 | 21   |
| RCA23_c27480 | 2911228 | 2910209 | GTP cyclohydrolase FolE                                | COG1469 | S | 454 | 382 | 72   |
| RCA23_c27490 | 2912575 | 2911334 | O-succinylhomoserine sulfhydrylase MetZ                | COG0626 | E | 484 | 552 | -68  |
| RCA23_c27500 | 2912751 | 2913443 | hypothetical protein                                   | COG0625 | O | 355 | 420 | -65  |
| RCA23_c27510 | 2914130 | 2913531 | putative intracellular septation protein               | COG2917 | D | 725 | 845 | -120 |
| RCA23_c27520 | 2915048 | 2914146 | hypothetical protein                                   | COG0697 | G | 373 | 538 | -165 |
| RCA23_c27530 | 2916226 | 2915045 | putative cell division protein                         | COG0552 | U | 244 | 359 | -115 |
| RCA23_c27540 | 2918008 | 2916323 | NADH-quinone oxidoreductase subunits E/F (fused)       | COG1894 | C | 257 | 373 | -116 |
| RCA23_c27550 | 2919686 | 2918133 | exodeoxyribonuclease 7 large subunit XseA              | COG1570 | L | 243 | 310 | -67  |
| RCA23_c27560 | 2919757 | 2921019 | phosphoribosylamine--glycine ligase PurD               | COG0151 | F | 245 | 400 | -155 |
| RCA23_c27570 | 2921398 | 2921075 | hypothetical protein, ferredoxin                       | COG0633 | C | 495 | 375 | 120  |
| RCA23_c27580 | 2921502 | 2921894 | hypothetical protein                                   | COG0587 | L | 158 | 249 | -91  |
| RCA23_c27590 | 2923443 | 2921956 | periplasmic serine protease DO-like                    | COG0265 | O | 449 | 643 | -194 |
| RCA23_c27600 | 2924668 | 2923781 | putative protein hflC                                  | COG0330 | O | 553 | 459 | 94   |
| RCA23_c27610 | 2925849 | 2924668 | protein HflK                                           | COG0330 | O | 588 | 454 | 134  |
| RCA23_c27620 | 2927271 | 2925913 | glutathione reductase Gor                              | COG1249 | C | 302 | 406 | -104 |
| RCA23_c27630 | 2928055 | 2927336 | ribose-5-phosphate isomerase A                         | COG0120 | G | 357 | 434 | -77  |
| RCA23_c27640 | 2928355 | 2928125 | hypothetical protein                                   |         |   | 300 | 310 | -10  |
| RCA23_c27650 | 2928419 | 2929792 | L-serine dehydratase SdaB                              | COG1760 | E | 239 | 300 | -61  |
| RCA23_c27660 | 2929823 | 2930707 | putative integral membrane protein                     | COG0697 | G | 437 | 492 | -55  |
| RCA23_c27670 | 2931346 | 2930672 | hypothetical protein, thiamine pyrophosphokinase       | COG1564 | H | 326 | 453 | -127 |
| RCA23_c27680 | 2931480 | 2931917 | hypothetical protein                                   |         |   | 176 | 341 | -165 |
| RCA23_c27690 | 2932339 | 2933484 | hypothetical protein                                   |         |   | 512 | 344 | 168  |
| RCA23_c27700 | 2933779 | 2933552 | hypothetical protein                                   |         |   | 335 | 362 | -27  |
| RCA23_c27710 | 2935071 | 2933779 | adenylosuccinate synthase PurA                         | COG0104 | F | 436 | 466 | -30  |

|              |         |         |                                                               |         |   |     |     |      |
|--------------|---------|---------|---------------------------------------------------------------|---------|---|-----|-----|------|
| RCA23_c27720 | 2935313 | 2935666 | preprotein translocase, SecG subunit SecG                     |         |   | 324 | 415 | -91  |
| RCA23_c27730 | 2935819 | 2937462 | CTP synthase                                                  | COG0504 | F | 449 | 408 | 41   |
| RCA23_c27740 | 2937481 | 2937774 | hypothetical protein, DUF1330                                 | COG5470 | S | 276 | 315 | -39  |
| RCA23_c27750 | 2937874 | 2938227 | hypothetical protein DUF1332                                  | COG4103 | S | 274 | 238 | 36   |
| RCA23_c27760 | 2938232 | 2938948 | hypothetical protein                                          | COG3221 | P | 184 | 292 | -108 |
| RCA23_c27770 | 2939027 | 2939800 | amino acid transport ATP-binding protein                      | COG4598 | E | 412 | 570 | -158 |
| RCA23_c27780 | 2939834 | 2940547 | putative amino acid transport extracellular solute binding pr | COG0834 | E | 476 | 436 | 40   |
| RCA23_c27790 | 2940762 | 2941547 | putative ABC transporter inner membrane component             | COG4215 | E | 351 | 411 | -60  |
| RCA23_c27800 | 2941544 | 2942347 | putative amino acid transport permease protein                | COG4160 | E | 271 | 371 | -100 |
| RCA23_c27810 | 2942344 | 2943621 | gamma-glutamylputrescine synthase PuuA                        | COG0174 | E | 366 | 351 | 15   |
| RCA23_c27820 | 2943682 | 2944383 | hypothetical protein, glutamine amidotransferase class I      | COG0518 | F | 410 | 506 | -96  |
| RCA23_c27830 | 2944380 | 2945732 | gamma-glutamylputrescine synthase PuuA                        | COG0174 | E | 319 | 376 | -57  |
| RCA23_c27840 | 2945725 | 2947029 | gamma-glutamylputrescine oxidoreductase PuuB                  | COG0665 | E | 194 | 296 | -102 |
| RCA23_c27850 | 2947227 | 2948594 | aminotransferase class III                                    | COG0161 | H | 481 | 435 | 46   |
| RCA23_c27860 | 2949102 | 2948632 | putative PHB synthesis repressor protein                      | COG5394 | S | 616 | 440 | 176  |
| RCA23_c27870 | 2949760 | 2949338 | hypothetical protein                                          |         |   | 962 | 483 | 479  |
| RCA23_c27880 | 2951592 | 2949850 | poly(R)-hydroxyalkanoic acid synthase PhaC                    | COG3243 | I | 772 | 600 | 172  |
| RCA23_c27890 | 2951693 | 2952952 | polyhydroxyalkanoate depolymerase PhaZ                        | COG4553 | I | 424 | 429 | -5   |
| RCA23_c27900 | 2952949 | 2953992 | putative ribosome biogenesis GTPase RsgA                      | COG1162 | R | 273 | 335 | -62  |
| RCA23_c27910 | 2954694 | 2953999 | hypothetical protein, alpha/beta hydrolase-like               | COG0596 | R | 295 | 397 | -102 |
| RCA23_c27920 | 2955122 | 2954814 | hypothetical protein                                          |         |   | 640 | 594 | 46   |
| RCA23_c27930 | 2955968 | 2955144 | hypothetical protein, alpha/beta hydrolase-like               | COG0596 | R | 489 | 563 | -74  |
| RCA23_c27940 | 2956110 | 2958059 | threonyl-tRNA synthase ThrS                                   | COG0441 | J | 302 | 309 | -7   |
| RCA23_c27950 | 2958494 | 2958111 | hypothetical protein, ArsC                                    | COG1393 | P | 275 | 345 | -70  |
| RCA23_c27960 | 2959802 | 2958891 | thymidylate synthase                                          | COG1351 | F | 515 | 437 | 78   |
| RCA23_c27970 | 2959890 | 2960318 | putative glyoxalase/bleomycin resistance protein/dioxygena    | COG0346 | E | 379 | 413 | -34  |
| RCA23_c27980 | 2960315 | 2961049 | hypothetical protein                                          |         |   | 489 | 471 | 18   |
| RCA23_c27990 | 2961528 | 2961043 | putative transcriptional regulator marR family                | COG1846 | K | 717 | 600 | 117  |
| RCA23_c28000 | 2961866 | 2961600 | hypothetical protein DUF339                                   | COG2938 | S | 807 | 701 | 106  |
| RCA23_c28010 | 2962255 | 2961863 | hypothetical protein, DNA binding                             | COG1813 | K | 611 | 550 | 61   |

|              |         |         |                                                            |         |   |     |     |      |
|--------------|---------|---------|------------------------------------------------------------|---------|---|-----|-----|------|
| RCA23_c28020 | 2962344 | 2963546 | aspartate aminotransferase AatA                            | COG0436 | E | 538 | 517 | 21   |
| RCA23_c28030 | 2963696 | 2963965 | hypothetical protein                                       |         |   | 520 | 538 | -18  |
| RCA23_c28040 | 2965311 | 2963962 | multidrug resistance protein NorM                          | COG0534 | V | 289 | 371 | -82  |
| RCA23_c28050 | 2965347 | 2967407 | DNA topoisomerase 4 subunit B                              | COG0187 | L | 401 | 416 | -15  |
| RCA23_c28060 | 2967432 | 2967866 | hypothetical protein                                       | COG3238 | S | 246 | 456 | -210 |
| RCA23_c28070 | 2968865 | 2967876 | putative malate/L-lactate dehydrogenase                    | COG2055 | C | 232 | 307 | -75  |
| RCA23_c28080 | 2969623 | 2968946 | lipoprotein-releasing system ATP-binding protein LolD      | COG1136 | V | 324 | 503 | -179 |
| RCA23_c28090 | 2970938 | 2969616 | lipoprotein-releasing system transmembrane protein, lolC/E | COG4591 | M | 391 | 420 | -29  |
| RCA23_c28100 | 2972322 | 2970991 | prolyl-tRNA synthase ProS                                  | COG0442 | J | 552 | 522 | 30   |
| RCA23_c28110 | 2972479 | 2973552 | hypothetical protein DUF20                                 | COG0628 | R | 376 | 457 | -81  |
| RCA23_c28120 | 2973581 | 2974198 | hypothetical protein                                       | COG0593 | L | 404 | 491 | -87  |
| RCA23_c28130 | 2974261 | 2976429 | polyphosphate kinase Ppk                                   | COG0855 | P | 432 | 474 | -42  |
| RCA23_c28140 | 2976502 | 2978046 | putative phosphatase                                       | COG0248 | F | 329 | 415 | -86  |
| RCA23_c28150 | 2978758 | 2978078 | hypothetical protein, DnaJ                                 | COG1076 | O | 357 | 406 | -49  |
| RCA23_c28160 | 2979420 | 2978806 | hypothetical protein                                       |         |   | 360 | 363 | -3   |
| RCA23_c28170 | 2981568 | 2979442 | methylmalonyl-CoA mutase McmA                              | COG1884 | I | 438 | 453 | -15  |
| RCA23_c28180 | 2981692 | 2982117 | hypothetical protein                                       |         |   | 443 | 452 | -9   |
| RCA23_c28190 | 2984179 | 2982182 | biotin carboxylase AccC                                    | COG4770 | I | 463 | 438 | 25   |
| RCA23_c28200 | 2984788 | 2984429 | hypothetical protein                                       |         |   | 688 | 418 | 270  |
| RCA23_c28210 | 2986426 | 2984807 | propionyl-CoA carboxylase beta chain, mitochondrial precu  | COG4799 | I | 431 | 395 | 36   |
| RCA23_c28220 | 2986614 | 2987720 | putative major facilitator superfamily transporter         | COG2814 | G | 324 | 367 | -43  |
| RCA23_c28230 | 2987752 | 2989146 | hypothetical protein                                       | COG3800 | R | 268 | 299 | -31  |
| RCA23_c28240 | 2990629 | 2989175 | betaine aldehyde dehydrogenase BetB                        | COG1012 | C | 271 | 382 | -111 |
| RCA23_c28250 | 2991519 | 2990626 | hypothetical protein                                       | COG0697 | G | 358 | 670 | -312 |
| RCA23_c28260 | 2992971 | 2991571 | TRAP dicarboxylate transporter, subunit DctM               | COG1593 | G | 456 | 452 | 4    |
| RCA23_c28270 | 2993600 | 2992971 | TRAP dicarboxylate transporter, subunit DctQ               | COG4665 | Q | 526 | 453 | 73   |
| RCA23_c28280 | 2994698 | 2993682 | TRAP dicarboxylate transporter, subunit DctP               | COG1638 | G | 773 | 495 | 278  |
| RCA23_c28290 | 2995125 | 2994823 | transcriptional regulator, LacI family                     | COG1609 | K | 194 | 295 | -101 |
| RCA23_c28300 | 2996093 | 2995341 | hypothetical protein, DUF81 family                         | COG0730 | R | 642 | 487 | 155  |
| RCA23_c28310 | 2997240 | 2996074 | serine--glyoxylate aminotransferase SgaA                   | COG0075 | E | 671 | 457 | 214  |

|              |         |         |                                                                |         |   |     |     |      |
|--------------|---------|---------|----------------------------------------------------------------|---------|---|-----|-----|------|
| RCA23_c28320 | 2997311 | 3000124 | D-lactate dehydrogenase Dld                                    | COG0277 | C | 433 | 316 | 117  |
| RCA23_c28330 | 3000108 | 3000872 | hypothetical protein                                           |         |   | 591 | 406 | 185  |
| RCA23_c28340 | 3002359 | 3000869 | AMP-binding enzyme                                             | COG0318 | I | 627 | 378 | 249  |
| RCA23_c28350 | 3003741 | 3002356 | succinate-semialdehyde dehydrogenase SucD                      | COG1012 | C | 714 | 387 | 327  |
| RCA23_c28360 | 3005263 | 3003773 | hypothetical protein                                           | COG3333 | S | 551 | 345 | 206  |
| RCA23_c28370 | 3005815 | 3005270 | hypothetical protein                                           |         |   | 566 | 428 | 138  |
| RCA23_c28380 | 3006899 | 3005886 | putative tripartite tricarboxylate transporter family receptor | COG3181 | S | 478 | 291 | 187  |
| RCA23_c28390 | 3008174 | 3007812 | putative ETC complex I subunit                                 |         |   | 483 | 380 | 103  |
| RCA23_c28450 | 3014946 | 3014311 | sulfoxide reductase heme-binding subunit YedZ                  | COG2717 | S | 606 | 414 | 192  |
| RCA23_c28460 | 3015970 | 3015032 | sulfoxide reductase catalytic subunit YedY                     | COG2041 | R | 699 | 498 | 201  |
| RCA23_c28470 | 3016084 | 3016839 | 3-oxoacyl-[acyl-carrier-protein] reductase FabG                | COG1028 | I | 217 | 388 | -171 |
| RCA23_c28480 | 3017484 | 3016816 | putative haloacid dehalogenase-like hydrolase                  | COG0637 | R | 241 | 355 | -114 |
| RCA23_c28490 | 3020158 | 3017549 | chaperone protein ClpB                                         | COG0542 | O | 571 | 466 | 105  |
| RCA23_c28500 | 3020382 | 3021098 | orotidine 5'-phosphate decarboxylase PyrF                      | COG0284 | F | 231 | 360 | -129 |
| RCA23_c28510 | 3021376 | 3021095 | hypothetical protein                                           |         |   | 303 | 257 | 46   |
| RCA23_c28520 | 3022266 | 3021376 | SPFH domain/band 7 family protein                              | COG0330 | O | 332 | 320 | 12   |
| RCA23_c28530 | 3022399 | 3023655 | DNA polymerase IV                                              | COG0389 | L | 244 | 376 | -132 |
| RCA23_c28540 | 3024583 | 3023660 | putative N-formylglutamate amidohydrolase                      | COG3741 | E | 220 | 384 | -164 |
| RCA23_c28560 | 3026236 | 3025031 | hypothetical protein, phenylacetate-coenzyme A ligase          | COG1541 | H | 354 | 468 | -114 |
| RCA23_c28570 | 3027095 | 3026262 | high-affinity branched-chain amino acid transporter ATP-bin    | COG0410 | E | 388 | 363 | 25   |
| RCA23_c28580 | 3028426 | 3027146 | hypothetical protein                                           | COG0683 | E | 356 | 266 | 90   |
| RCA23_c28590 | 3029567 | 3028491 | high-affinity branched-chain amino acid transporter permea     | COG4177 | E | 514 | 348 | 166  |
| RCA23_c28600 | 3030631 | 3029630 | high-affinity branched-chain amino acid transporter permea     | COG0559 | E | 662 | 420 | 242  |
| RCA23_c28610 | 3031517 | 3030699 | high-affinity branched-chain amino acid transporter ATP-bin    | COG0411 | E | 616 | 480 | 136  |
| RCA23_c28620 | 3033530 | 3031569 | putative long-chain-fatty-acid-CoA ligase                      | COG1022 | I | 540 | 469 | 71   |
| RCA23_c28630 | 3034611 | 3033706 | tRNA pseudouridine synthase B                                  | COG0130 | J | 444 | 471 | -27  |
| RCA23_c28650 | 3035184 | 3034663 | ribosome-binding factor A                                      | COG0858 | J | 390 | 589 | -199 |
| RCA23_c28640 | 3035183 | 3035992 | dihydrodipicolinate synthase DapA                              | COG0289 | E | 232 | 307 | -75  |
| RCA23_c28660 | 3036242 | 3036039 | hypothetical protein DUF1674                                   | COG5508 | S | 308 | 405 | -97  |
| RCA23_c28670 | 3036304 | 3037596 | putative ribosomal RNA small subunit methyltransferase B       | COG0144 | J | 319 | 342 | -23  |

|              |         |         |                                                                 |         |   |     |     |      |
|--------------|---------|---------|-----------------------------------------------------------------|---------|---|-----|-----|------|
| RCA23_c28680 | 3037762 | 3039378 | hypothetical protein, heparinase II/III                         | COG5360 | S | 307 | 415 | -108 |
| RCA23_c28690 | 3039420 | 3041006 | bifunctional purine biosynthesis protein PurH                   | COG0138 | F | 334 | 417 | -83  |
| RCA23_c28700 | 3041008 | 3041490 | signal peptidase II                                             | COG0597 | M | 444 | 466 | -22  |
| RCA23_c28710 | 3041564 | 3042898 | uncharacterized zinc protease y4wA                              | COG0612 | R | 259 | 271 | -12  |
| RCA23_c28720 | 3042895 | 3044199 | uncharacterized zinc protease y4wB                              | COG0612 | R | 343 | 387 | -44  |
| RCA23_c28730 | 3044234 | 3046045 | DNA mismatch repair protein MutL                                | COG0323 | L | 277 | 394 | -117 |
| RCA23_c28740 | 3046042 | 3047181 | putative RmuC family protein                                    | COG1322 | S | 453 | 493 | -40  |
| RCA23_c28750 | 3047826 | 3047176 | transcriptional activator ChrR                                  | COG3806 | T | 328 | 336 | -8   |
| RCA23_c28760 | 3048473 | 3047823 | RNA polymerase sigma factor SigK                                | COG1595 | K | 815 | 442 | 373  |
| RCA23_c28770 | 3048595 | 3049896 | hypothetical protein                                            | COG2907 | R | 645 | 423 | 222  |
| RCA23_c28780 | 3049893 | 3050648 | hypothetical protein DUF1365                                    | COG3496 | S | 321 | 368 | -47  |
| RCA23_c28790 | 3050645 | 3051886 | hypothetical protein                                            | COG2211 | G | 246 | 374 | -128 |
| RCA23_c28800 | 3051883 | 3052434 | hypothetical protein                                            |         |   | 338 | 406 | -68  |
| RCA23_c28810 | 3052441 | 3053175 | putative short chain dehydrogenase                              | COG4221 | R | 338 | 412 | -74  |
| RCA23_c28820 | 3054242 | 3053181 | saccharopine dehydrogenase (NAD <sup>+</sup> ,L-lysine-forming) | COG3288 | C | 244 | 380 | -136 |
| RCA23_c28830 | 3054838 | 3054239 | putative glutathione S-transferase                              | COG0625 | O | 410 | 462 | -52  |
| RCA23_c28840 | 3055518 | 3054859 | putative phosphoglycerate mutase family protein                 | COG0406 | G | 408 | 433 | -25  |
| RCA23_c28850 | 3055678 | 3058473 | formate dehydrogenase Fdh                                       | COG3383 | R | 256 | 355 | -99  |
| RCA23_c28860 | 3059684 | 3058476 | hypothetical protein                                            | COG1357 | S | 149 | 173 | -24  |
| RCA23_c28870 | 3059845 | 3060351 | hypothetical protein DUF1643                                    | COG4333 | S | 165 | 251 | -86  |
| RCA23_c28880 | 3060348 | 3061232 | haloacetate dehalogenase DehH                                   | COG0596 | R | 216 | 302 | -86  |
| RCA23_c28890 | 3061378 | 3061647 | 30S ribosomal protein S15                                       | COG0184 | J | 532 | 436 | 96   |
| RCA23_c28900 | 3061763 | 3062671 | hypothetical protein, DUF6 transmembrane protein                | COG0697 | G | 291 | 363 | -72  |
| RCA23_c28910 | 3062837 | 3064972 | polyribonucleotide nucleotidyltransferase Pnp                   | COG1185 | J | 566 | 452 | 114  |
| RCA23_c28920 | 3065297 | 3066739 | aldehyde dehydrogenase                                          | COG1012 | C | 367 | 317 | 50   |
| RCA23_c28930 | 3067514 | 3066870 | ribosomal large subunit pseudouridine synthase A                | COG0564 | J | 330 | 420 | -90  |
| RCA23_c28940 | 3067641 | 3068903 | protein OtnG                                                    |         |   | 239 | 284 | -45  |
| RCA23_c28950 | 3068952 | 3069767 | hypothetical protein, DUF940 putative lipoprotein               |         |   | 460 | 502 | -42  |
| RCA23_c28960 | 3069770 | 3070432 | hypothetical protein                                            |         |   | 502 | 397 | 105  |
| RCA23_c28970 | 3070451 | 3071461 | UDP-glucose 4-epimerase GalE                                    | COG1087 | M | 409 | 393 | 16   |

|              |         |         |                                                 |         |   |       |     |       |
|--------------|---------|---------|-------------------------------------------------|---------|---|-------|-----|-------|
| RCA23_c28980 | 3072918 | 3071458 | putative FAD linked oxidase                     | COG0277 | C | 266   | 432 | -166  |
| RCA23_c28990 | 3073207 | 3074703 | signal recognition particle protein Ffh         | COG0541 | U | 323   | 360 | -37   |
| RCA23_c29000 | 3074735 | 3075031 | putative chorismate mutase type II              | COG1605 | E | 471   | 593 | -122  |
| RCA23_c29010 | 3075077 | 3075463 | 30S ribosomal protein S16                       | COG0228 | J | 454   | 521 | -67   |
| RCA23_c29020 | 3075599 | 3076204 | ribosome maturation factor RimM                 | COG0806 | J | 531   | 440 | 91    |
| RCA23_c29030 | 3076201 | 3076983 | tRNA (guanine-N(1)-)-methyltransferase TrmD     | COG0336 | J | 262   | 287 | -25   |
| RCA23_c29040 | 3077274 | 3077645 | 50S ribosomal protein L19                       | COG0335 | J | 1.180 | 564 | 616   |
| RCA23_c29050 | 3077657 | 3077878 | 50S ribosomal protein L31                       | COG0254 | J | 843   | 515 | 328   |
| RCA23_c29060 | 3078055 | 3078864 | ATPase MipZ                                     | COG1192 | D | 467   | 427 | 40    |
| RCA23_c29070 | 3079793 | 3078861 | fructokinase                                    | COG0524 | G | 353   | 434 | -81   |
| RCA23_c29080 | 3080009 | 3081187 | P-hydroxybenzoate hydroxylase PobA              | COG0654 | H | 481   | 429 | 52    |
| RCA23_c29090 | 3081251 | 3082447 | kynureninase KynU                               | COG3844 | E | 389   | 318 | 71    |
| RCA23_c29100 | 3083041 | 3083694 | HTH-type transcriptional regulator, GntR family | COG1802 | K | 449   | 308 | 141   |
| RCA23_c29110 | 3083761 | 3084600 | hypothetical protein, glutathione S-transferase | COG0625 | O | 529   | 404 | 125   |
| RCA23_c29120 | 3084701 | 3085639 | L-threonine 3-dehydrogenase                     | COG0451 | M | 348   | 353 | -5    |
| RCA23_c29130 | 3085650 | 3086444 | enoyl-CoA hydratase                             | COG1024 | I | 185   | 255 | -70   |
| RCA23_c29140 | 3087386 | 3086463 | enoyl-CoA hydratase                             | COG1250 | I | 205   | 333 | -128  |
| RCA23_c29150 | 3088163 | 3087396 | 3-hydroxyacyl-CoA dehydrogenase FadN            | COG1028 | I | 242   | 312 | -70   |
| RCA23_c29160 | 3088298 | 3088942 | hypothetical protein                            |         |   | 381   | 386 | -5    |
| RCA23_c29170 | 3089925 | 3088969 | integrase                                       | COG4974 | L | 458   | 427 | 31    |
| RCA23_c29180 | 3090052 | 3091107 | hypothetical protein, porin-like                |         |   | 520   | 390 | 130   |
| RCA23_c29190 | 3091254 | 3093845 | leucyl-tRNA synthase LeuS                       | COG0495 | J | 433   | 380 | 53    |
| RCA23_c29200 | 3093904 | 3094302 | hypothetical protein DUF2159                    |         |   | 571   | 462 | 109   |
| RCA23_c29210 | 3094299 | 3095324 | hypothetical protein                            |         |   | 274   | 392 | -118  |
| RCA23_c29220 | 3095325 | 3095912 | hypothetical protein, glutathione S-transferase | COG0625 | O | 500   | 442 | 58    |
| RCA23_c29230 | 3097108 | 3095885 | hypothetical protein                            | COG2081 | R | 237   | 270 | -33   |
| RCA23_c29240 | 3098243 | 3097311 | hypothetical protein, porin                     |         |   | 1.707 | 409 | 1.298 |
| RCA23_c29250 | 3098481 | 3099143 | hypothetical protein, alanine racemase-like     | COG0325 | R | 273   | 282 | -9    |
| RCA23_c29260 | 3099644 | 3099150 | hypothetical protein, YkuD                      | COG3786 | S | 218   | 327 | -109  |
| RCA23_c29270 | 3100696 | 3099641 | GTP cyclohydrolase II RibA                      | COG0807 | H | 321   | 376 | -55   |



|              |         |         |                                                          |         |   |     |     |      |
|--------------|---------|---------|----------------------------------------------------------|---------|---|-----|-----|------|
| RCA23_c29280 | 3100840 | 3101526 | response regulator receiver protein                      | COG0745 | T | 801 | 648 | 153  |
| RCA23_c29290 | 3102576 | 3101779 | 2-oxo-hepta-3-ene-1,7-dioic acid hydratase HpcG          | COG3971 | Q | 378 | 339 | 39   |
| RCA23_c29300 | 3103430 | 3102573 | fumarylacetoacetate hydrolase family protein             | COG0179 | Q | 416 | 428 | -12  |
| RCA23_c29310 | 3103834 | 3103427 | 5-carboxymethyl-2-hydroxymuconate isomerase              | COG3232 | E | 367 | 337 | 30   |
| RCA23_c29320 | 3104009 | 3104446 | homoprotocatechuate degradation operon regulator HpaR    | COG1846 | K | 513 | 682 | -169 |
| RCA23_c29330 | 3104443 | 3105903 | 4-hydroxyphenylacetate 3-monooxygenase oxygenase com     | COG2368 | Q | 396 | 413 | -17  |
| RCA23_c29340 | 3106978 | 3105926 | ABC sugar transporter, ATPase subunit                    | COG3839 | G | 417 | 427 | -10  |
| RCA23_c29350 | 3108378 | 3106966 | mannitol 2-dehydrogenase MtlK                            | COG0246 | G | 541 | 470 | 71   |
| RCA23_c29360 | 3109277 | 3108384 | transcriptional regulator, AraC family                   | COG2207 | K | 845 | 568 | 277  |
| RCA23_c29370 | 3110179 | 3109343 | ABC sugar transporter, permease protein                  | COG0395 | G | 673 | 486 | 187  |
| RCA23_c29380 | 3111128 | 3110190 | ABC sugar transporter, permease protein                  | COG1175 | G | 627 | 368 | 259  |
| RCA23_c29390 | 3112520 | 3111240 | ABC transporter, periplasmic substrate-binding protein   | COG1653 | G | 482 | 349 | 133  |
| RCA23_c29400 | 3113045 | 3113410 | putative flavohemoglobin / bacterial hemoglobin          | COG1017 | C | 172 | 151 | 21   |
| RCA23_c29410 | 3113570 | 3113848 | hypothetical protein                                     |         |   | 357 | 239 | 118  |
| RCA23_c29420 | 3115053 | 3113854 | Na <sup>+</sup> /H <sup>+</sup> antiporter NhaA          | COG3004 | P | 869 | 651 | 218  |
| RCA23_c29430 | 3115555 | 3115160 | hypothetical protein                                     |         |   | 343 | 377 | -34  |
| RCA23_c29440 | 3116046 | 3115633 | hypothetical protein DUF55                               | COG2947 | S | 575 | 446 | 129  |
| RCA23_c29450 | 3116318 | 3116046 | protein Ycil                                             | COG2350 | S | 444 | 407 | 37   |
| RCA23_c29460 | 3117283 | 3116318 | glycerol-3-phosphate dehydrogenase GpsA                  | COG0240 | C | 295 | 365 | -70  |
| RCA23_c29470 | 3117383 | 3118087 | hypothetical protein, uroporphyrinogen-III synthase HemD | COG1587 | H | 261 | 373 | -112 |
| RCA23_c29480 | 3118112 | 3119260 | hypothetical protein                                     | COG3264 | M | 297 | 444 | -147 |
| RCA23_c29490 | 3119271 | 3120746 | hypothetical protein, HemY                               | COG3898 | S | 255 | 322 | -67  |
| RCA23_c29500 | 3121065 | 3120736 | transcriptional regulatory protein, Ars family           | COG0640 | K | 351 | 449 | -98  |
| RCA23_c29510 | 3122055 | 3121183 | magnesium-chelatase subunit BchO                         | COG0596 | R | 368 | 539 | -171 |
| RCA23_c29520 | 3123707 | 3122055 | magnesium-chelatase subunit BchD                         | COG1240 | H | 228 | 347 | -119 |
| RCA23_c29530 | 3124716 | 3123709 | magnesium-chelatase subunit BchI                         | COG1239 | H | 259 | 357 | -98  |
| RCA23_c29540 | 3125459 | 3124713 | spheroidene monooxygenase CrtA                           |         |   | 327 | 471 | -144 |
| RCA23_c29550 | 3125514 | 3127076 | phytoene dehydrogenase CrtI                              | COG1233 | Q | 248 | 310 | -62  |
| RCA23_c29560 | 3127073 | 3128113 | phytoene synthase CrtB                                   | COG1562 | I | 282 | 412 | -130 |
| RCA23_c29570 | 3129022 | 3128114 | hydroxyneurosporene dehydrogenase CrtC                   |         |   | 315 | 427 | -112 |

|              |         |         |                                                                      |         |   |       |     |       |
|--------------|---------|---------|----------------------------------------------------------------------|---------|---|-------|-----|-------|
| RCA23_c29580 | 3130449 | 3129025 | methoxyneurosporene dehydrogenase CrtD                               | COG1233 | Q | 258   | 382 | -124  |
| RCA23_c29590 | 3130597 | 3131511 | geranylgeranyl pyrophosphate synthase CrtE                           | COG0142 | H | 317   | 337 | -20   |
| RCA23_c29600 | 3131511 | 3132656 | hydroxyneurosporene methyltransferase CrtF                           |         |   | 351   | 342 | 9     |
| RCA23_c29610 | 3132720 | 3133685 | 2-desacetyl-2-hydroxyethyl bacteriochlorophyllide A dehydr           | COG1063 | E | 357   | 361 | -4    |
| RCA23_c29620 | 3133682 | 3134686 | chlorophyllide reductase BchX                                        | COG1348 | P | 519   | 502 | 17    |
| RCA23_c29630 | 3134679 | 3136250 | chlorophyllide reductase BchY                                        |         |   | 341   | 319 | 22    |
| RCA23_c29640 | 3136250 | 3137710 | chlorophyllide reductase subunit BchZ                                | COG2710 | C | 536   | 488 | 48    |
| RCA23_c29650 | 3137707 | 3137940 | protein PufQ                                                         |         |   | 537   | 427 | 110   |
| RCA23_c29660 | 3138087 | 3138242 | light-harvesting protein B-870 beta chain PufB                       |         |   | 6.978 | 500 | 6.478 |
| RCA23_c29670 | 3138259 | 3138411 | light-harvesting protein B-870 alpha chain PufA                      |         |   | 6.270 | 527 | 5.743 |
| RCA23_c29680 | 3138531 | 3139361 | reaction center protein L chain PufL                                 |         |   | 874   | 581 | 293   |
| RCA23_c29690 | 3139375 | 3140298 | reaction center protein M chain PufM                                 |         |   | 677   | 578 | 99    |
| RCA23_c29700 | 3140323 | 3140562 | protein PufX                                                         |         |   | 968   | 617 | 351   |
| RCA23_c29710 | 3140748 | 3142640 | 1-deoxy-D-xylulose-5-phosphate synthase Dxs                          | COG1154 | H | 354   | 396 | -42   |
| RCA23_c29720 | 3143177 | 3142659 | isopentenyl-diphosphate delta-isomerase ldi                          | COG1443 | I | 410   | 573 | -163  |
| RCA23_c29730 | 3144355 | 3143177 | geranylgeranyl reductase BchP                                        | COG0644 | C | 323   | 416 | -93   |
| RCA23_c29740 | 3145650 | 3144358 | bacteriochlorophyll synthase 44.5 kDa chain                          |         |   | 331   | 411 | -80   |
| RCA23_c29750 | 3146546 | 3145647 | bacteriochlorophyll synthase BchG                                    | COG0382 | H | 279   | 365 | -86   |
| RCA23_c29760 | 3146699 | 3147133 | cytochrome c-551                                                     | COG3474 | C | 2.610 | 694 | 1.916 |
| RCA23_c29770 | 3148204 | 3147191 | uroporphyrinogen decarboxylase HemE                                  | COG0407 | H | 678   | 490 | 188   |
| RCA23_c29780 | 3148383 | 3149273 | porphobilinogen deaminase HemC                                       | COG0181 | H | 296   | 376 | -80   |
| RCA23_c29790 | 3149254 | 3150213 | hypothetical protein, NmrA-like                                      | COG0702 | M | 262   | 383 | -121  |
| RCA23_c29800 | 3151424 | 3150210 | 5-aminolevulinate synthase HemA                                      | COG0156 | H | 552   | 474 | 78    |
| RCA23_c29810 | 3152220 | 3151414 | hypothetical protein                                                 |         |   | 439   | 465 | -26   |
| RCA23_c29820 | 3153347 | 3152220 | aerobic Mg-protoporphyrin IX monomethyl ester oxidative cyclase AcsF |         |   | 646   | 487 | 159   |
| RCA23_c29830 | 3153640 | 3153344 | hypothetical protein                                                 |         |   | 666   | 516 | 150   |
| RCA23_c29840 | 3154124 | 3153657 | hypothetical protein                                                 |         |   | 392   | 356 | 36    |
| RCA23_c29850 | 3154768 | 3154130 | hypothetical protein                                                 |         |   | 466   | 594 | -128  |
| RCA23_c29860 | 3155600 | 3154827 | reaction center protein PuhA                                         |         |   | 424   | 380 | 44    |
| RCA23_c29870 | 3157046 | 3155619 | protein PucC                                                         |         |   | 416   | 549 | -133  |

|              |         |         |                                                                |         |   |       |     |       |
|--------------|---------|---------|----------------------------------------------------------------|---------|---|-------|-----|-------|
| RCA23_c29880 | 3157708 | 3157043 | magnesium-protoporphyrin O-methyltransferase BchM              | COG2227 | H | 353   | 470 | -117  |
| RCA23_c29890 | 3158604 | 3157708 | light-independent protochlorophyllide reductase iron-sulfur /  | COG1348 | P | 615   | 601 | 14    |
| RCA23_c29900 | 3162147 | 3158638 | magnesium-chelatase subunit BchH                               | COG1429 | H | 346   | 408 | -62   |
| RCA23_c29910 | 3163717 | 3162173 | light-independent protochlorophyllide reductase subunit Bcf    | COG2710 | C | 379   | 421 | -42   |
| RCA23_c29920 | 3164946 | 3163714 | light-independent protochlorophyllide reductase subunit Bcf    | COG2710 | C | 243   | 340 | -97   |
| RCA23_c29930 | 3165482 | 3164994 | 2-vinyl bacteriochlorophyllide hydratase BchF                  |         |   | 606   | 518 | 88    |
| RCA23_c29940 | 3165800 | 3166510 | putative transcriptional regulator PpaA                        |         |   | 654   | 578 | 76    |
| RCA23_c29950 | 3166571 | 3167995 | transcriptional regulator PpsR                                 | COG3829 | K | 507   | 360 | 147   |
| RCA23_c29960 | 3168781 | 3168005 | hypothetical protein                                           | COG5012 | R | 383   | 415 | -32   |
| RCA23_c29970 | 3169806 | 3169207 | transcriptional regulator protein FixJ                         | COG4566 | T | 571   | 377 | 194   |
| RCA23_c29980 | 3170351 | 3169872 | peripheral-type benzodiazepine receptor/signal transductor     | COG3476 | T | 659   | 589 | 70    |
| RCA23_c29990 | 3170538 | 3170972 | hypothetical protein, integral membrane proteins YeeE/Yed      | COG2391 | R | 475   | 462 | 13    |
| RCA23_c30000 | 3171010 | 3171402 | hypothetical protein, integral membrane proteins YeeE/Yed      | COG2391 | R | 439   | 527 | -88   |
| RCA23_c30010 | 3171440 | 3172324 | putative beta-lactamase hydrolase-like protein                 | COG0491 | R | 519   | 451 | 68    |
| RCA23_c30020 | 3172386 | 3172811 | hypothetical protein                                           | COG3453 | S | 400   | 482 | -82   |
| RCA23_c30030 | 3172854 | 3174578 | sulphate transporter                                           | COG0659 | P | 577   | 541 | 36    |
| RCA23_c30040 | 3174623 | 3176065 | amidase                                                        | COG0154 | J | 392   | 412 | -20   |
| RCA23_c30050 | 3176200 | 3176790 | hypothetical protein                                           |         |   | 555   | 390 | 165   |
| RCA23_c30060 | 3176778 | 3177194 | aminoglycoside phosphotransferase Aph                          |         |   | 655   | 451 | 204   |
| RCA23_c30070 | 3177342 | 3178808 | hypothetical protein                                           | COG2885 | M | 447   | 429 | 18    |
| RCA23_c30080 | 3179766 | 3178849 | chaperone protein DnaJ                                         | COG0484 | O | 337   | 327 | 10    |
| RCA23_c30090 | 3181980 | 3180073 | chaperone protein DnaK                                         | COG0443 | O | 2.596 | 868 | 1.728 |
| RCA23_c30100 | 3182136 | 3182774 | putative alpha-ketoglutarate-dependent dioxygenase AlkB        | COG3145 | L | 444   | 449 | -5    |
| RCA23_c30110 | 3183607 | 3182780 | putative ABC-2 type transporter                                | COG1682 | G | 559   | 435 | 124   |
| RCA23_c30120 | 3183719 | 3184516 | 3'(2'),5'-bisphosphate nucleotidase CysQ                       | COG1218 | P | 487   | 424 | 63    |
| RCA23_c30130 | 3184712 | 3185623 | UTP-glucose-1-phosphate uridylyltransferase GalU               | COG1210 | M | 100   | 76  | 24    |
| RCA23_c30140 | 3185671 | 3186672 | hypothetical protein                                           | COG0463 | M | 29    | 29  | 0     |
| RCA23_c30150 | 3186755 | 3187789 | hypothetical protein                                           |         |   | 61    | 22  | 39    |
| RCA23_c30160 | 3187804 | 3189483 | hypothetical protein beta-1,6-N-acetylglucosaminyltransferases |         |   | 64    | 40  | 24    |
| RCA23_c30170 | 3189485 | 3190912 | hypothetical protein                                           |         |   | 83    | 93  | -10   |

|              |         |         |                                                           |         |   |       |     |      |
|--------------|---------|---------|-----------------------------------------------------------|---------|---|-------|-----|------|
| RCA23_c30180 | 3191373 | 3190909 | nitrogen regulatory protein PtsN                          | COG1762 | G | 462   | 459 | 3    |
| RCA23_c30190 | 3191964 | 3191398 | putative sigma 54 modulation protein                      | COG1544 | J | 716   | 558 | 158  |
| RCA23_c30200 | 3192915 | 3192157 | lipopolysaccharide export system ATP-binding protein LptB | COG1137 | R | 444   | 438 | 6    |
| RCA23_c30210 | 3193403 | 3192915 | putative lipopolysaccharide export system protein LptA    | COG1934 | S | 280   | 352 | -72  |
| RCA23_c30220 | 3194020 | 3193412 | hypothetical protein                                      |         |   | 689   | 490 | 199  |
| RCA23_c30230 | 3194662 | 3194048 | putative 3'-5'-exonuclease                                | COG0349 | J | 741   | 509 | 232  |
| RCA23_c30240 | 3194850 | 3195968 | glycine amidinotransferase                                | COG1834 | E | 521   | 526 | -5   |
| RCA23_c30250 | 3196817 | 3196053 | hypothetical protein                                      | COG4123 | R | 631   | 493 | 138  |
| RCA23_c30260 | 3197481 | 3196918 | hypothetical protein, metal-dependent phosphohydrolase    | COG1896 | R | 457   | 580 | -123 |
| RCA23_c30270 | 3197634 | 3199025 | S-adenosyl-L-homocysteine hydrolase AhcY                  | COG0499 | H | 603   | 490 | 113  |
| RCA23_c30280 | 3199890 | 3199339 | photosynthetic apparatus regulatory protein RegA          | COG4567 | T | 407   | 550 | -143 |
| RCA23_c30290 | 3200570 | 3199947 | protein SenC                                              | COG1999 | R | 543   | 578 | -35  |
| RCA23_c30300 | 3200649 | 3202016 | sensor histidine kinase RegB                              | COG0642 | T | 358   | 402 | -44  |
| RCA23_c30310 | 3202073 | 3203299 | hypothetical protein                                      |         |   | 342   | 444 | -102 |
| RCA23_c30320 | 3203450 | 3204445 | hypothetical protein, aminoglycoside phosphotransferase   | COG3178 | R | 494   | 540 | -46  |
| RCA23_c30330 | 3204445 | 3205107 | hypothetical protein, nucleotidyl transferase             | COG1208 | M | 458   | 486 | -28  |
| RCA23_c30340 | 3205100 | 3208018 | double-strand break repair protein AddB                   | COG3893 | L | 333   | 483 | -150 |
| RCA23_c30350 | 3208015 | 3211371 | double-strand break repair helicase AddA                  | COG1074 | L | 483   | 495 | -12  |
| RCA23_c30360 | 3211430 | 3211750 | thioredoxin TrxA                                          | COG3118 | O | 926   | 781 | 145  |
| RCA23_c30370 | 3211858 | 3212415 | ATP-dependent protease HslV                               | COG5405 | O | 570   | 616 | -46  |
| RCA23_c30380 | 3212412 | 3213719 | ATP-dependent hsl protease ATP-binding subunit HslU       | COG1220 | O | 505   | 486 | 19   |
| RCA23_c30390 | 3213757 | 3214968 | MFS-type transporter                                      | COG2814 | G | 450   | 609 | -159 |
| RCA23_c30400 | 3215543 | 3214965 | hypothetical protein, Smr protein/MutS2                   | COG2840 | S | 359   | 384 | -25  |
| RCA23_c30410 | 3216574 | 3215546 | putative lytic murein transglycosylase                    | COG2821 | M | 516   | 462 | 54   |
| RCA23_c30420 | 3217245 | 3216571 | hypothetical protein, TIM44                               | COG4395 | S | 603   | 469 | 134  |
| RCA23_c30430 | 3217333 | 3217791 | putative cytoplasmic membrane protein FxsA                | COG3030 | R | 1.292 | 879 | 413  |
| RCA23_c30440 | 3217847 | 3218353 | protein-export protein SecB                               | COG1952 | U | 980   | 584 | 396  |
| RCA23_c30450 | 3219045 | 3218350 | DNA polymerase III subunit epsilon                        | COG0847 | L | 740   | 456 | 284  |
| RCA23_c30460 | 3219631 | 3219038 | dephospho-CoA kinase CoaE                                 | COG0237 | H | 607   | 420 | 187  |
| RCA23_c30470 | 3221043 | 3219628 | shikimate 5-dehydrogenase AroE                            | COG0169 | E | 384   | 325 | 59   |

|              |         |         |                                                                       |         |   |     |     |      |
|--------------|---------|---------|-----------------------------------------------------------------------|---------|---|-----|-----|------|
| RCA23_c30480 | 3222030 | 3223286 | transcription termination factor Rho                                  | COG1158 | K | 799 | 587 | 212  |
| RCA23_c30490 | 3223296 | 3224582 | tRNA modification GTPase MnmE                                         | COG0486 | R | 677 | 610 | 67   |
| RCA23_c30500 | 3224597 | 3226456 | tRNA uridine 5-carboxymethylaminomethyl modification enz              | COG0445 | D | 754 | 479 | 275  |
| RCA23_c30510 | 3226453 | 3227076 | ribosomal RNA small subunit methyltransferase G                       | COG0357 | M | 923 | 624 | 299  |
| RCA23_c30520 | 3227063 | 3227839 | chromosome-partitioning protein ParA                                  | COG1192 | D | 715 | 536 | 179  |
| RCA23_c30530 | 3227913 | 3228749 | chromosome-partitioning protein ParB                                  | COG1475 | K | 590 | 401 | 189  |
| RCA23_c30540 | 3229894 | 3228746 | oxygen-independent coproporphyrinogen III oxidase HemN                | COG0635 | H | 502 | 365 | 137  |
| RCA23_c30550 | 3230502 | 3229894 | nucleoside-triphosphatase RdgB                                        | COG0127 | F | 443 | 404 | 39   |
| RCA23_c30560 | 3231212 | 3230502 | ribonuclease PH                                                       | COG0689 | J | 433 | 583 | -150 |
| RCA23_c30570 | 3231309 | 3232340 | heat-inducible transcription repressor HrcA                           | COG1420 | K | 677 | 565 | 112  |
| RCA23_c30580 | 3232347 | 3232901 | protein GrpE                                                          | COG0576 | O | 715 | 541 | 174  |
| RCA23_c30590 | 3235734 | 3232948 | DNA mismatch repair protein MutS                                      | COG0249 | L | 382 | 470 | -88  |
| RCA23_c30600 | 3235847 | 3238102 | NADP-dependent malic enzyme MaeB                                      | COG0281 | C | 751 | 604 | 147  |
| RCA23_c30610 | 3238099 | 3238974 | pfkB family carbohydrate kinase                                       | COG0524 | G | 385 | 437 | -52  |
| RCA23_c30620 | 3239064 | 3239972 | putative aminotransferase class IV                                    | COG0115 | E | 420 | 511 | -91  |
| RCA23_c30630 | 3239969 | 3240679 | hypothetical protein, branched-chain-amino-acid aminotransferase-like |         |   | 281 | 358 | -77  |
| RCA23_c30640 | 3241914 | 3240697 | argininosuccinate synthase ArgG                                       | COG0137 | E | 456 | 465 | -9   |
| RCA23_c30650 | 3242076 | 3243311 | threonine dehydratase, biosynthetic                                   | COG1171 | E | 565 | 492 | 73   |
| RCA23_c30660 | 3243760 | 3243320 | putative NUDIX hydrolase                                              | COG0494 | L | 859 | 585 | 274  |
| RCA23_c30670 | 3243841 | 3244851 | heat shock protein 33                                                 | COG1281 | O | 563 | 552 | 11   |
| RCA23_c30680 | 3244832 | 3245428 | putative NUDIX hydrolase                                              | COG0494 | L | 312 | 397 | -85  |
| RCA23_c30690 | 3245425 | 3246585 | hypothetical protein, poly A polymerase                               | COG0617 | J | 231 | 347 | -116 |
| RCA23_c30700 | 3246667 | 3248505 | ABC transporter ATP-binding/permease protein                          | COG1132 | V | 582 | 671 | -89  |
| RCA23_c30710 | 3248505 | 3249719 | hypothetical protein                                                  | COG2265 | J | 472 | 532 | -60  |
| RCA23_c30720 | 3249726 | 3250487 | ion transport protein                                                 |         |   | 613 | 593 | 20   |
| RCA23_c30730 | 3250547 | 3251041 | hypothetical protein                                                  | COG3034 | S | 812 | 587 | 225  |
| RCA23_c30740 | 3251589 | 3251068 | hypothetical protein, SCP-like extracellular protein                  | COG2340 | S | 495 | 433 | 62   |
| RCA23_c30750 | 3251740 | 3252339 | hypothetical protein                                                  | COG1376 | S | 713 | 514 | 199  |
| RCA23_c30760 | 3253788 | 3252730 | ferrochelatase HemH                                                   | COG0276 | H | 912 | 584 | 328  |
| RCA23_c30770 | 3254654 | 3253839 | hypothetical protein                                                  |         |   | 409 | 512 | -103 |

|              |         |         |                                                          |         |   |     |     |      |
|--------------|---------|---------|----------------------------------------------------------|---------|---|-----|-----|------|
| RCA23_c30780 | 3254684 | 3255250 | hypothetical protein, ComF/GntX family                   | COG1040 | R | 415 | 446 | -31  |
| RCA23_c30790 | 3255612 | 3255869 | glutaredoxin GrxC                                        | COG0695 | O | 580 | 614 | -34  |
| RCA23_c30800 | 3255866 | 3256708 | putative carbon-nitrogen hydrolase                       | COG0388 | R | 467 | 593 | -126 |
| RCA23_c30810 | 3256692 | 3257135 | putative HTH-type transcriptional regulator, MarR family | COG1846 | K | 401 | 502 | -101 |
| RCA23_c30820 | 3257890 | 3257132 | 3-demethylubiquinone-9 3-O-methyltransferase UbiG        | COG2227 | H | 394 | 398 | -4   |
| RCA23_c30830 | 3257891 | 3258916 | proline iminopeptidase Pip                               | COG0596 | R | 482 | 453 | 29   |
| RCA23_c30840 | 3259000 | 3259989 | putative peptide transport system permease protein       | COG0601 | E | 927 | 665 | 262  |
| RCA23_c30850 | 3259998 | 3261185 | putative peptide transport system permease protein       | COG1173 | E | 830 | 594 | 236  |
| RCA23_c30860 | 3261190 | 3262836 | peptide transport system ATP-binding protein             | COG1123 | R | 405 | 486 | -81  |
| RCA23_c30870 | 3262914 | 3264458 | putative periplasmic peptide-binding protein             | COG0747 | E | 501 | 416 | 85   |
| RCA23_c30880 | 3264952 | 3265524 | hypothetical protein UPF0090                             | COG0779 | S | 735 | 510 | 225  |
| RCA23_c30890 | 3265524 | 3267137 | transcription elongation protein NusA                    | COG0195 | K | 693 | 541 | 152  |
| RCA23_c30900 | 3267138 | 3267740 | hypothetical protein DUF448                              | COG2740 | K | 467 | 523 | -56  |
| RCA23_c30910 | 3267775 | 3270240 | translation initiation factor IF-2                       | COG0532 | J | 419 | 390 | 29   |
| RCA23_c30920 | 3270924 | 3270526 | putative mutator MutT protein                            | COG1051 | F | 388 | 382 | 6    |
| RCA23_c30930 | 3272138 | 3270921 | arginine biosynthesis bifunctional protein ArgJ          | COG1364 | E | 357 | 419 | -62  |
| RCA23_c30940 | 3272976 | 3272143 | putative peptidylprolyl isomerase                        | COG0760 | O | 441 | 438 | 3    |
| RCA23_c30950 | 3273165 | 3275849 | protein translocase subunit SecA                         | COG0653 | U | 662 | 490 | 172  |
| RCA23_c30960 | 3276115 | 3277296 | putative O-acetyltransferase OatA                        | COG1835 | I | 719 | 508 | 211  |
| RCA23_c30970 | 3278383 | 3277550 | hypothetical protein                                     | COG4922 | S | 341 | 243 | 98   |
| RCA23_c30980 | 3278502 | 3278876 | hypothetical protein, transcriptional regulator-like     | COG1733 | K | 257 | 195 | 62   |
| RCA23_c30990 | 3278997 | 3280049 | UDP-glucuronate 5'-epimerase LspL                        | COG0451 | M | 224 | 174 | 50   |
| RCA23_c31000 | 3281732 | 3280023 | hypothetical protein                                     |         |   | 214 | 200 | 14   |
| RCA23_c31010 | 3283201 | 3281858 | phosphoglucosamine mutase GlmM                           | COG1109 | G | 394 | 488 | -94  |
| RCA23_c31020 | 3284844 | 3283315 | putative ubiquinone biosynthesis protein UbiB            | COG0661 | R | 400 | 432 | -32  |
| RCA23_c31030 | 3285621 | 3284845 | ubiquinone/menaquinone biosynthesis methyltransferase U  | COG2226 | H | 488 | 408 | 80   |
| RCA23_c31040 | 3285680 | 3286531 | formamidopyrimidine-DNA glycosylase MutM                 | COG0266 | L | 369 | 371 | -2   |
| RCA23_c31050 | 3286594 | 3287370 | enoyl-CoA hydratase/isomerase                            | COG1024 | I | 637 | 567 | 70   |
| RCA23_c31060 | 3287519 | 3287782 | 30S ribosomal protein S20                                | COG0268 | J | 521 | 411 | 110  |
