# Supplementary material
Source: PubMed Central journal article supplement (PMC4303631)
Supplement: ismej2014134x4.pdf [file ismej2014134x4.pdf]

Table S7: COG categories, genomic islands and coverage of *P. temperata* RC23 genes from combined stations GS02-13 of the GOS data set and Norwegian fjord metagenome (Gilbert et al. 2008).

| Coverages of <80% are marked pink and genomic islands gray |                                                         |         |              |                 |                                          |                              |
|------------------------------------------------------------|---------------------------------------------------------|---------|--------------|-----------------|------------------------------------------|------------------------------|
| locus_tag                                                  | annotation                                              | COG id  | COG category | genomic islands | GOS stations GS02-GS13 gene coverage [%] | Fjord gDNA gene coverage [%] |
| RCA23_c00010                                               | chromosomal replication initiator protein DnaA          | COG0593 | L            |                 | 100.00                                   | 100.00                       |
| RCA23_c00020                                               | DNA polymerase III beta subunit DnaN                    | COG0592 | L            |                 | 100.00                                   | 99.55                        |
| RCA23_c00030                                               | DNA replication and repair protein RecF                 | COG1195 | L            |                 | 100.00                                   | 100.00                       |
| RCA23_c00040                                               | hypothetical protein, LysE type translocator            | COG1280 | E            |                 | 100.00                                   | 100.00                       |
| RCA23_c00050                                               | DNA gyrase subunit B                                    | COG0187 | L            |                 | 100.00                                   | 99.92                        |
| RCA23_c00060                                               | FAD dependent oxidoreductase                            | COG0665 | E            |                 | 100.00                                   | 100.00                       |
| RCA23_c00070                                               | hypothetical protein, rhodanese-like sulphurtransferase | COG1054 | R            |                 | 100.00                                   | 100.00                       |
| RCA23_c00080                                               | pyrazinamidase/nicotinamidase PncA                      | COG1335 | Q            |                 | 100.00                                   | 100.00                       |
| RCA23_c00090                                               | nicotinate phosphoribosyltransferase PncB               | COG1488 | H            |                 | 100.00                                   | 100.00                       |
| RCA23_c00100                                               | aminoglycoside phosphotransferase                       | COG2334 | R            |                 | 100.00                                   | 100.00                       |
| RCA23_c00110                                               | putative aminotransferase class III                     | COG0160 | E            |                 | 100.00                                   | 100.00                       |
| RCA23_c00120                                               | putative peptide chain release factor                   | COG1186 | J            |                 | 100.00                                   | 100.00                       |
| RCA23_c00130                                               | hypothetical integral membrane protein                  | COG1738 | S            |                 | 100.00                                   | 100.00                       |
| RCA23_c00140                                               | penicillin-insensitive murein endopeptidase MepA        | COG3770 | M            |                 | 100.00                                   | 99.57                        |
| RCA23_c00150                                               | putative MFS-type transporter                           | COG2270 | R            |                 | 100.00                                   | 100.00                       |
| RCA23_c00160                                               | hypothetical protein                                    | COG0824 | R            |                 | 100.00                                   | 100.00                       |
| RCA23_c00170                                               | hypothetical protein, YGGT family                       | COG0762 | S            |                 | 100.00                                   | 100.00                       |
| RCA23_c00180                                               | ATP-dependent DNA helicase RecQ                         | COG0514 | L            |                 | 100.00                                   | 100.00                       |
| RCA23_c00190                                               | hypothetical protein DUF328                             | COG3022 | S            |                 | 100.00                                   | 100.00                       |
| RCA23_c00200                                               | isopentenyl-diphosphate delta-isomerase Idi             | COG1443 | I            |                 | 100.00                                   | 100.00                       |
| RCA23_c00210                                               | 5-aminolevulinic acid synthase HemaA                    | COG0156 | H            |                 | 100.00                                   | 100.00                       |
| RCA23_c00220                                               | cytochrome c2                                           | COG3474 | C            |                 | 100.00                                   | 100.00                       |
| RCA23_c00230                                               | acetyl-CoA acetyltransferase PhaA                       | COG0183 | I            |                 | 100.00                                   | 100.00                       |
| RCA23_c00240                                               | DNA polymerase III 2 alpha subunit DnaE                 | COG0587 | L            |                 | 100.00                                   | 100.00                       |

|              |                                                           |         |   |        |        |
|--------------|-----------------------------------------------------------|---------|---|--------|--------|
| RCA23_c00250 | transcription antitermination protein NusG                | COG0250 | K | 100.00 | 100.00 |
| RCA23_c00260 | putative lytic murein transglycosylase                    | COG2951 | M | 100.00 | 100.00 |
| RCA23_c00270 | putative ribonuclease R                                   | COG0557 | K | 100.00 | 99.24  |
| RCA23_c00280 | hypothetical protein DUF461                               | COG2847 | S | 100.00 | 100.00 |
| RCA23_c00290 | chorismate synthase AroC                                  | COG0082 | E | 100.00 | 100.00 |
| RCA23_c00300 | hypothetical protein                                      |         |   | 100.00 | 100.00 |
| RCA23_c00310 | thiamine-binding periplasmic protein ThiB                 | COG4143 | H | 100.00 | 100.00 |
| RCA23_c00320 | thiamine transport system permease protein ThiP           | COG1178 | P | 100.00 | 100.00 |
| RCA23_c00330 | thiamine import ATP-binding protein ThiQ                  | COG3840 | H | 100.00 | 100.00 |
| RCA23_c00340 | cytochrome c1                                             | COG2857 | C | 100.00 | 100.00 |
| RCA23_c00350 | cytochrome b                                              | COG1290 | C | 100.00 | 97.53  |
| RCA23_c00360 | ubiquinol-cytochrome c reductase iron-sulfur subunit PetA | COG0723 | C | 100.00 | 100.00 |
| RCA23_c00370 | hypothetical protein, glutathione S-transferase           | COG0625 | O | 100.00 | 100.00 |
| RCA23_c00380 | inositol 2-dehydrogenase IdhA                             | COG0673 | R | 100.00 | 100.00 |
| RCA23_c00390 | protein PmbA                                              | COG0312 | R | 100.00 | 100.00 |
| RCA23_c00400 | putative inositol monophosphatase                         | COG0483 | G | 100.00 | 100.00 |
| RCA23_c00410 | putative 3-deoxy-D-manno-octulosonic-acid transferase     | COG1519 | M | 100.00 | 100.00 |
| RCA23_c00420 | tetraacyldisaccharide 4'-kinase LpxK                      | COG1663 | M | 100.00 | 100.00 |
| RCA23_c00430 | hypothetical protein, thioredoxin                         | COG1651 | O | 100.00 | 100.00 |
| RCA23_c00440 | hypothetical protein DUF721                               | COG5389 | S | 100.00 | 100.00 |
| RCA23_c00450 | A/G-specific adenine glycosylase YfhQ                     | COG1194 | L | 100.00 | 100.00 |
| RCA23_c00460 | alkane 1-monooxygenase AlkB                               |         |   | 100.00 | 100.00 |
| RCA23_c00470 | modification methylase CcrM                               | COG0863 | L | 100.00 | 100.00 |
| RCA23_c00480 | ribonuclease HII                                          | COG0164 | L | 100.00 | 100.00 |
| RCA23_c00490 | putative exodeoxyribonuclease III                         | COG0708 | L | 100.00 | 100.00 |
| RCA23_c00500 | hypothetical protein, thioredoxin                         | COG3118 | O | 100.00 | 100.00 |
| RCA23_c00510 | putative ATP-dependent protease La (LON)                  | COG2802 | R | 100.00 | 100.00 |
| RCA23_c00520 | hypothetical protein, Trm112p-like                        | COG2835 | S | 100.00 | 100.00 |
| RCA23_c00530 | putative 2-octaprenyl-6-methoxyphenol hydroxylase         | COG0654 | H | 100.00 | 100.00 |
| RCA23_c00540 | glutamyl-tRNA(Gln) amidotransferase subunit A             | COG0154 | J | 100.00 | 98.02  |
| RCA23_c00550 | LL-diaminopimelate aminotransferase DapL                  | COG0436 | E | 100.00 | 100.00 |
| RCA23_c00560 | putative DNA translocase FtsK                             | COG1674 | D | 100.00 | 100.00 |
| RCA23_c00570 | putative outer membrane lipoprotein carrier protein LolA  | COG2834 | M | 100.00 | 93.55  |

|              |                                                                              |         |   |      |        |        |
|--------------|------------------------------------------------------------------------------|---------|---|------|--------|--------|
| RCA23_c00580 | hypothetical protein                                                         | COG4764 | S |      | 100.00 | 100.00 |
| RCA23_c00590 | hemimethylated DNA-binding protein, YccV like                                | COG3785 | S |      | 100.00 | 100.00 |
| RCA23_c00600 | putative gamma-glutamyltransferase ywrD                                      | COG0405 | E |      | 100.00 | 100.00 |
| RCA23_c00610 | acetyl-CoA acetyltransferase ThIA                                            | COG0183 | I |      | 100.00 | 98.13  |
| RCA23_c00620 | hypothetical protein                                                         | COG1956 | T |      | 100.00 | 100.00 |
| RCA23_c00630 | putative HTH-type transcriptional regulator                                  | COG1396 | K |      | 100.00 | 100.00 |
| RCA23_c00640 | hypothetical protein, homoserine/homoserine lactone efflux protein           | COG1280 | E |      | 100.00 | 100.00 |
| RCA23_c00650 | LysE-type translocator                                                       | COG1280 | E |      | 100.00 | 87.72  |
| RCA23_c00660 | dimethylglycine dehydrogenase                                                | COG0404 | E |      | 100.00 | 95.83  |
| RCA23_c00670 | putative homocysteine S-methyltransferase                                    | COG2040 | E |      | 100.00 | 100.00 |
| RCA23_c00680 | pyridoxamine 5'-phosphate oxidase-like protein, FMN-binding                  | COG3576 | R |      | 100.00 | 99.34  |
| RCA23_c00690 | sarcosine dehydrogenase                                                      | COG0404 | E |      | 100.00 | 100.00 |
| RCA23_c00700 | hypothetical protein                                                         | COG0790 | R |      | 100.00 | 100.00 |
| RCA23_c00710 | putative agmatine deiminase AguA                                             | COG2957 | E |      | 100.00 | 100.00 |
| RCA23_c00720 | Cl <sup>-</sup> channel, voltage-gated family protein                        | COG0038 | P |      | 100.00 | 85.75  |
| RCA23_c00730 | Cl <sup>-</sup> channel, voltage-gated family protein                        | COG0038 | P |      | 100.00 | 89.68  |
| RCA23_c00750 | diaminopimelate epimerase DapF                                               | COG0253 | E | GI 1 | 100.00 | 100.00 |
| RCA23_c00760 | (dimethylallyl)adenosine tRNA methylthiotransferase MiaB                     | COG0621 | J | GI 1 | 100.00 | 100.00 |
| RCA23_c00770 | hypothetical protein, glutathione S-transferase                              | COG0625 | O | GI 1 | 100.00 | 100.00 |
| RCA23_c00780 | HTH-type transcriptional regulator, LacI family                              | COG1609 | K | GI 1 | 71.79  | 100.00 |
| RCA23_c00790 | hypothetical protein                                                         |         |   | GI 1 | 100.00 | 100.00 |
| RCA23_c00800 | hypothetical protein                                                         | COG4274 | S | GI 1 | 100.00 | 100.00 |
| RCA23_c00810 | hypothetical protein, phosphoglycerate mutase-like                           | COG0406 | G | GI 1 | 95.68  | 100.00 |
| RCA23_c00820 | hypothetical protein                                                         | COG0790 | R | GI 1 | 100.00 | 100.00 |
| RCA23_c00830 | hypothetical protein, glyoxalase/bleomycin resistance protein/dihydroxybiphe | COG0346 | E | GI 1 | 100.00 | 100.00 |
| RCA23_c00840 | putative phage integrase                                                     | COG4974 | L | GI 1 | 100.00 | 100.00 |
| RCA23_c00850 | hypothetical protein                                                         |         |   | GI 1 | 0.00   | 67.44  |
| RCA23_c00860 | hypothetical protein                                                         |         |   | GI 1 | 0.00   | 32.85  |
| RCA23_c00870 | putative endonuclease                                                        |         |   | GI 1 | 0.00   | 0.00   |
| RCA23_c00880 | DNA integration/recombination/inversion protein                              | COG1961 | L | GI 1 | 0.00   | 100.00 |
| RCA23_c00890 | hypothetical protein                                                         |         |   | GI 1 | 0.00   | 100.00 |
| RCA23_c00900 | hypothetical protein, peptidoglycan binding-like                             |         |   | GI 1 | 0.00   | 0.00   |
| RCA23_c00910 | hypothetical protein                                                         |         |   | GI 1 | 0.00   | 0.00   |

|              |                                                          |         |   |      |        |        |
|--------------|----------------------------------------------------------|---------|---|------|--------|--------|
| RCA23_c00920 | putative phage integrase                                 | COG4974 | L | GI 1 | 0.00   | 50.33  |
| RCA23_c00940 | putative HTH-type transcriptional repressor, ArsR family | COG0640 | K |      | 100.00 | 100.00 |
| RCA23_c00950 | ATP synthase protein I                                   |         |   |      | 100.00 | 100.00 |
| RCA23_c00960 | ATP synthase subunit AtpB                                | COG0356 | C |      | 100.00 | 100.00 |
| RCA23_c00970 | ATP synthase subunit c                                   |         |   |      | 100.00 | 100.00 |
| RCA23_c01000 | pyruvate dehydrogenase complex repressor                 | COG2186 | K |      | 100.00 | 100.00 |
| RCA23_c01010 | inner membrane lipoprotein YiaD                          | COG2885 | M |      | 100.00 | 100.00 |
| RCA23_c01020 | endonuclease III                                         | COG0177 | L |      | 100.00 | 100.00 |
| RCA23_c01030 | putative pfkB family carbohydrate kinase                 | COG0524 | G |      | 100.00 | 100.00 |
| RCA23_c01040 | hypothetical protein                                     |         |   |      | 100.00 | 100.00 |
| RCA23_c01050 | glycosyl transferase family 14                           |         |   |      | 100.00 | 100.00 |
| RCA23_c01060 | hypothetical protein                                     |         |   |      | 100.00 | 100.00 |
| RCA23_c01070 | HIT-like protein                                         | COG0537 | F |      | 100.00 | 100.00 |
| RCA23_c01080 | ABC transporter ATP binding protein                      | COG1131 | V |      | 100.00 | 96.42  |
| RCA23_c01090 | hypothetical protein                                     | COG4391 | S |      | 100.00 | 100.00 |
| RCA23_c01100 | hypothetical protein                                     |         |   |      | 100.00 | 100.00 |
| RCA23_c01110 | DNA polymerase I                                         | COG0749 | L |      | 100.00 | 100.00 |
| RCA23_c01120 | cystathionine gamma-synthase MetB                        | COG0626 | E |      | 100.00 | 100.00 |
| RCA23_c01130 | ribosomal large subunit pseudouridine synthase RluE      | COG1187 | J |      | 100.00 | 100.00 |
| RCA23_c01140 | hypothetical protein DUF1285                             | COG3816 | S |      | 100.00 | 100.00 |
| RCA23_c01150 | ATPase, MoxR type                                        | COG0714 | R |      | 100.00 | 100.00 |
| RCA23_c01160 | hypothetical protein                                     | COG1721 | R |      | 100.00 | 94.56  |
| RCA23_c01170 | hypothetical protein                                     |         |   |      | 100.00 | 100.00 |
| RCA23_c01180 | hypothetical protein DUF1355                             | COG5426 | S |      | 100.00 | 100.00 |
| RCA23_c01190 | glycolate oxidase subunit GlcD                           | COG0277 | C |      | 100.00 | 80.83  |
| RCA23_c01200 | glycolate oxidase subunit GlcE                           | COG0277 | C |      | 100.00 | 100.00 |
| RCA23_c01210 | glycolate oxidase iron-sulfur subunit GlcF               | COG0247 | C |      | 100.00 | 100.00 |
| RCA23_c01220 | hypothetical protein, trypsin                            | COG3591 | E |      | 100.00 | 100.00 |
| RCA23_c01230 | putative chitinase                                       | COG3325 | G |      | 15.64  | 33.69  |
| RCA23_c01240 | small heat shock protein IbpA                            | COG0071 | O |      | 100.00 | 100.00 |
| RCA23_c01250 | succinate-semialdehyde dehydrogenase GabD                | COG1012 | C |      | 100.00 | 100.00 |
| RCA23_c01260 | hypothetical protein                                     | COG0657 | I |      | 100.00 | 100.00 |
| RCA23_c01270 | hypothetical protein                                     | COG5617 | S |      | 100.00 | 100.00 |

|              |                                                           |         |   |        |        |
|--------------|-----------------------------------------------------------|---------|---|--------|--------|
| RCA23_c01280 | putative cyclopentanol dehydrogenase CpnA                 | COG1028 | I | 100.00 | 100.00 |
| RCA23_c01290 | hypothetical protein                                      |         |   | 100.00 | 100.00 |
| RCA23_c01300 | hypothetical protein DUF1523                              |         |   | 100.00 | 100.00 |
| RCA23_c01310 | aldehyde dehydrogenase                                    | COG1012 | C | 100.00 | 100.00 |
| RCA23_c01320 | deoxyribose-phosphate aldolase DeoC                       | COG0274 | F | 100.00 | 100.00 |
| RCA23_c01330 | ribulose-phosphate 3-epimerase, chromosomal               | COG0036 | G | 100.00 | 100.00 |
| RCA23_c01340 | hemolysin-type calcium-binding region                     |         |   | 100.00 | 100.00 |
| RCA23_c01350 | 5-oxoprolinase (ATP-hydrolyzing)                          | COG0145 | E | 95.58  | 99.00  |
| RCA23_c01360 | aminotransferase class-III                                | COG0161 | H | 100.00 | 100.00 |
| RCA23_c01370 | ureidoglycolate hydrolase AIIA                            | COG3194 | F | 100.00 | 100.00 |
| RCA23_c01380 | aldose 1-epimerase GalM                                   | COG2017 | G | 100.00 | 100.00 |
| RCA23_c01390 | beta-galactosidase BgaB                                   | COG1874 | G | 100.00 | 96.33  |
| RCA23_c01400 | putative gluconolactonase                                 | COG3386 | G | 100.00 | 100.00 |
| RCA23_c01410 | 2-dehydro-3-deoxy-6-phosphogalactonate aldolase DgoA      | COG0800 | G | 100.00 | 100.00 |
| RCA23_c01420 | 2-dehydro-3-deoxygalactonokinase DgoK                     | COG3734 | G | 100.00 | 100.00 |
| RCA23_c01430 | short chain dehydrogenase                                 | COG1028 | I | 100.00 | 100.00 |
| RCA23_c01440 | alpha-galactosidase RafA                                  | COG3345 | G | 100.00 | 100.00 |
| RCA23_c01450 | putative ABC transporter inner membrane component         | COG0395 | G | 100.00 | 98.89  |
| RCA23_c01460 | putative ABC transporter inner membrane component         | COG1175 | G | 100.00 | 100.00 |
| RCA23_c01470 | putative extracellular solute-binding protein             | COG1653 | G | 42.04  | 70.25  |
| RCA23_c01480 | HTH-type transcriptional regulator, IclR family           | COG1414 | K | 51.78  | 84.73  |
| RCA23_c01490 | sugar ABC transporter ATP-binding protein                 | COG3839 | G | 100.00 | 87.72  |
| RCA23_c01500 | Sulfite exporter TauE/SafE                                |         |   | 100.00 | 100.00 |
| RCA23_c01510 | putative transcriptional regulator, gntR family           | COG1167 | K | 100.00 | 100.00 |
| RCA23_c01520 | taurine--pyruvate aminotransferase Tpa                    | COG0161 | H | 95.52  | 95.92  |
| RCA23_c01530 | taurine ABC transporter, periplasmic binding protein TauA | COG4521 | P | 100.00 | 100.00 |
| RCA23_c01540 | taurine ABC transport system ATP-binding protein TauB     | COG1116 | P | 94.55  | 100.00 |
| RCA23_c01550 | taurine ABC transport system permease protein TauC        | COG0600 | P | 100.00 | 100.00 |
| RCA23_c01560 | dimethylglycine dehydrogenase                             | COG0404 | E | 100.00 | 99.21  |
| RCA23_c01570 | trimethylamine methyltransferase MttB                     | COG5598 | H | 100.00 | 100.00 |
| RCA23_c01580 | 3-hydroxyacyl-CoA dehydrogenase FadN                      | COG1250 | I | 100.00 | 100.00 |
| RCA23_c01590 | hypothetical protein                                      | COG0596 | R | 100.00 | 100.00 |
| RCA23_c01600 | O-acetylhomoserine (thiol)-lyase CysD                     | COG2873 | E | 100.00 | 97.02  |

|              |                                                                  |         |   |        |        |
|--------------|------------------------------------------------------------------|---------|---|--------|--------|
| RCA23_c01610 | putative signaling protein                                       | COG2200 | T | 100.00 | 100.00 |
| RCA23_c01620 | sulfoacetaldehyde acetyltransferase Xsc                          | COG0028 | E | 100.00 | 100.00 |
| RCA23_c01630 | phosphate acetyltransferase Pta                                  | COG0280 | C | 100.00 | 100.00 |
| RCA23_c01640 | DMSO reductase chain A                                           | COG0243 | C | 100.00 | 98.54  |
| RCA23_c01650 | alpha/beta hydrolase                                             | COG0596 | R | 100.00 | 93.42  |
| RCA23_c01660 | DMSO reductase chain B                                           | COG0437 | C | 100.00 | 100.00 |
| RCA23_c01670 | DMSO reductase chain C                                           | COG3302 | R | 100.00 | 100.00 |
| RCA23_c01680 | sodium:alanine symporter                                         | COG1115 | E | 100.00 | 100.00 |
| RCA23_c01690 | thymidine kinase Tdk                                             | COG1435 | F | 100.00 | 100.00 |
| RCA23_c01700 | NADPH-dependent FMN reductase                                    | COG0431 | R | 100.00 | 100.00 |
| RCA23_c01710 | carbamoyl-phosphate synthase large chain CarB                    | COG0458 | E | 73.66  | 100.00 |
| RCA23_c01720 | HTH-type transcriptional regulator, AsnC family                  | COG1522 | K | 44.51  | 100.00 |
| RCA23_c01730 | hypothetical protein                                             |         |   | 100.00 | 100.00 |
| RCA23_c01740 | aspartyl-tRNA synthase AspS                                      | COG0173 | J | 100.00 | 100.00 |
| RCA23_c01750 | hypothetical protein                                             |         |   | 100.00 | 100.00 |
| RCA23_c01760 | putative signal transduction response regulator receiver protein | COG2197 | T | 100.00 | 64.91  |
| RCA23_c01770 | methylmalonyl-CoA epimerase                                      | COG0346 | E | 100.00 | 100.00 |
| RCA23_c01780 | hypothetical protein DUF1467                                     | COG5454 | S | 100.00 | 100.00 |
| RCA23_c01790 | hypothetical protein DUF540                                      | COG2981 | E | 39.77  | 100.00 |
| RCA23_c01800 | putative nitroreductase                                          | COG0778 | C | 100.00 | 100.00 |
| RCA23_c01810 | histone deacetylase-like amidohydrolase HdaH                     | COG0123 | B | 100.00 | 100.00 |
| RCA23_c01820 | hypothetical protein                                             |         |   | 100.00 | 100.00 |
| RCA23_c01830 | hypothetical protein, peptidase family M48                       | COG0501 | O | 100.00 | 100.00 |
| RCA23_c01840 | hypothetical protein                                             |         |   | 100.00 | 100.00 |
| RCA23_c01850 | ribosomal protein S12 methylthiotransferase RimO                 | COG0621 | J | 100.00 | 100.00 |
| RCA23_c01860 | hypothetical protein, transmembrane                              |         |   | 100.00 | 100.00 |
| RCA23_c01870 | GcrA cell cycle regulator                                        | COG5352 | S | 100.00 | 96.34  |
| RCA23_c01880 | ABC-2 type transport system membrane protein                     | COG0842 | V | 100.00 | 100.00 |
| RCA23_c01890 | acetylornithine aminotransferase ArgD                            | COG4992 | E | 100.00 | 100.00 |
| RCA23_c01900 | ornithine carbamoyltransferase ArgF                              | COG0078 | E | 100.00 | 100.00 |
| RCA23_c01910 | hypothetical protein                                             |         |   | 100.00 | 100.00 |
| RCA23_c01920 | 6-phosphogluconate dehydrogenase GntZ                            | COG0362 | G | 100.00 | 100.00 |
| RCA23_c01930 | ATP-dependent RNA helicase HrpB                                  | COG1643 | L | 100.00 | 98.78  |

|              |                                                                     |         |   |        |        |
|--------------|---------------------------------------------------------------------|---------|---|--------|--------|
| RCA23_c01940 | LAO/AO transport system ATPase                                      | COG1703 | E | 100.00 | 100.00 |
| RCA23_c01950 | 50S ribosomal protein L28                                           | COG0227 | J | 100.00 | 100.00 |
| RCA23_c01960 | hypothetical protein                                                |         |   | 100.00 | 100.00 |
| RCA23_c01970 | GTP-binding protein LepA                                            | COG0481 | M | 100.00 | 93.71  |
| RCA23_c01980 | hypothetical protein, alpha/beta hydrolase-like                     | COG0596 | R | 100.00 | 100.00 |
| RCA23_c01990 | putative ring-cleaving dioxygenase                                  | COG0346 | E | 100.00 | 100.00 |
| RCA23_c02000 | serine hydroxymethyltransferase GlyA                                | COG0112 | E | 100.00 | 100.00 |
| RCA23_c02010 | putative inorganic polyphosphate/ATP-NAD kinase PpnK                | COG0061 | G | 100.00 | 100.00 |
| RCA23_c02020 | propionate--CoA ligase PrpE                                         | COG0365 | I | 100.00 | 100.00 |
| RCA23_c02030 | hypothetical protein                                                | COG1917 | S | 86.94  | 100.00 |
| RCA23_c02040 | cytidine deaminase Cdd                                              | COG0295 | F | 100.00 | 100.00 |
| RCA23_c02050 | thymidine phosphorylase DeoA                                        | COG0213 | F | 100.00 | 93.50  |
| RCA23_c02060 | phosphopentomutase DeoB                                             | COG1015 | G | 100.00 | 91.69  |
| RCA23_c02070 | adenosine deaminase Add                                             | COG1816 | F | 100.00 | 100.00 |
| RCA23_c02080 | uracil phosphoribosyltransferase Upp                                | COG0035 | F | 100.00 | 100.00 |
| RCA23_c02090 | hypothetical protein                                                |         |   | 100.00 | 100.00 |
| RCA23_c02100 | 3-deoxy-D-manno-octulosonic-acid transferase WaaA                   | COG1519 | M | 100.00 | 100.00 |
| RCA23_c02110 | L-sorbose 1-dehydrogenase                                           | COG2303 | E | 100.00 | 100.00 |
| RCA23_c02120 | putative N-acylneuraminate cytidyltransferase                       | COG1083 | M | 100.00 | 100.00 |
| RCA23_c02130 | UDP-4-amino-4-deoxy-L-arabinose--oxoglutarate aminotransferase ArnB | COG0399 | M | 100.00 | 100.00 |
| RCA23_c02140 | hypothetical protein                                                | COG3119 | P | 0.00   | 77.21  |
| RCA23_c02150 | hypothetical protein, nucleoside triphosphate hydrolases-like       | COG1122 | P | 0.00   | 69.70  |
| RCA23_c02160 | S-adenosyl-L-methionine-dependent methyltransferase                 | COG2226 | H | 0.00   | 100.00 |
| RCA23_c02170 | hypothetical protein                                                |         |   | 100.00 | 99.89  |
| RCA23_c02180 | medium-chain-fatty-acid--CoA ligase AlkK                            | COG0318 | I | 100.00 | 100.00 |
| RCA23_c02190 | hypothetical protein DUF6 transmembrane                             | COG0697 | G | 100.00 | 100.00 |
| RCA23_c02200 | fatty acid oxidation complex alpha subunit FadJ                     | COG1250 | I | 100.00 | 100.00 |
| RCA23_c02210 | hypothetical protein                                                |         |   | 100.00 | 96.38  |
| RCA23_c02220 | short chain dehydrogenase                                           | COG0183 | I | 100.00 | 100.00 |
| RCA23_c02230 | putative glutathione S-transferase                                  | COG0625 | O | 100.00 | 100.00 |
| RCA23_c02240 | acyl-CoA dehydrogenase MmgC                                         | COG1960 | I | 100.00 | 100.00 |
| RCA23_c02250 | putative HTH-type transcriptional regulator, MerR family            | COG0789 | K | 100.00 | 100.00 |
| RCA23_c02260 | putative HTH-type transcriptional regulator, MerR family            | COG0789 | K | 100.00 | 100.00 |

|              |                                                          |         |   |        |        |
|--------------|----------------------------------------------------------|---------|---|--------|--------|
| RCA23_c02270 | hypothetical protein, transmembrane protein DUF2899      |         |   | 100.00 | 100.00 |
| RCA23_c02280 | hypothetical protein, thioesterase                       | COG2050 | Q | 100.00 | 100.00 |
| RCA23_c02290 | hypothetical protein, thioesterase                       | COG2050 | Q | 100.00 | 100.00 |
| RCA23_c02300 | DNA-damage-inducible protein F                           | COG0534 | V | 100.00 | 100.00 |
| RCA23_c02310 | dihydroorotate dehydrogenase PyrD                        | COG0167 | F | 100.00 | 100.00 |
| RCA23_c02320 | hypothetical protein DUF952                              | COG3502 | S | 100.00 | 100.00 |
| RCA23_c02330 | 5'-nucleotidase SurE                                     | COG0737 | F | 100.00 | 97.26  |
| RCA23_c02340 | hypothetical protein                                     | COG3409 | M | 100.00 | 100.00 |
| RCA23_c02350 | glycyl-tRNA synthase alpha subunit GlyQ                  | COG0752 | J | 100.00 | 100.00 |
| RCA23_c02360 | hypothetical protein                                     |         |   | 100.00 | 100.00 |
| RCA23_c02370 | glycyl-tRNA synthase beta subunit GlyS                   | COG0751 | J | 100.00 | 100.00 |
| RCA23_c02380 | pyruvate, phosphate dikinase PpdK                        | COG0574 | G | 100.00 | 98.35  |
| RCA23_c02390 | putative cell wall hydrolase                             | COG3773 | M | 100.00 | 100.00 |
| RCA23_c02400 | hypothetical protein, dihydroneopterin aldolase          | COG1539 | H | 100.00 | 100.00 |
| RCA23_c02410 | dihydropteroate synthase FolP                            | COG0294 | H | 100.00 | 100.00 |
| RCA23_c02420 | putative integral membrane protein DUF6                  | COG0697 | G | 100.00 | 100.00 |
| RCA23_c02430 | ketol-acid reductoisomerase IlvC                         | COG0059 | E | 100.00 | 100.00 |
| RCA23_c02440 | putative transcriptional regulator, asnC family          | COG1522 | K | 100.00 | 100.00 |
| RCA23_c02450 | putative transcriptional regulator, asnC family          | COG1522 | K | 100.00 | 100.00 |
| RCA23_c02460 | hypothetical protein                                     | COG0075 | E | 94.44  | 100.00 |
| RCA23_c02470 | 2-octaprenyl-6-methoxyphenol hydroxylase UbiH            | COG0654 | H | 100.00 | 100.00 |
| RCA23_c02480 | putative pyrimidine 5-nucleotidase                       | COG1011 | R | 100.00 | 100.00 |
| RCA23_c02490 | putative HTH-type transcriptional regulator, GntR family | COG1802 | K | 100.00 | 100.00 |
| RCA23_c02500 | uncharacterized glycosyltransferase YdaM                 | COG1215 | M | 100.00 | 96.52  |
| RCA23_c02510 | carbamoyl-phosphate synthase small chain CarA            | COG0505 | E | 100.00 | 100.00 |
| RCA23_c02520 | GatB/YqeY family protein                                 | COG1610 | S | 100.00 | 100.00 |
| RCA23_c02530 | hypothetical protein                                     | COG5488 | S | 100.00 | 100.00 |
| RCA23_c02540 | cytochrome c oxidase subunit 1                           | COG0843 | C | 100.00 | 100.00 |
| RCA23_c02550 | octanoyltransferase LipB                                 | COG0321 | H | 100.00 | 100.00 |
| RCA23_c02560 | hypothetical protein, LytTr transcriptional regulator    | COG3279 | K | 100.00 | 99.61  |
| RCA23_c02570 | membrane protein-like                                    | COG5395 | S | 100.00 | 100.00 |
| RCA23_c02590 | arylsulfatase                                            | COG3119 | P | 100.00 | 100.00 |
| RCA23_c02600 | NADPH dehydrogenas                                       | COG1902 | C | 100.00 | 100.00 |



|              |                                                                    |         |   |        |        |
|--------------|--------------------------------------------------------------------|---------|---|--------|--------|
| RCA23_c02610 | L-idonate 5-dehydrogenase IdnD                                     | COG1063 | E | 100.00 | 100.00 |
| RCA23_c02620 | gluconate 5-dehydrogenase Gno                                      | COG1028 | I | 100.00 | 100.00 |
| RCA23_c02630 | uncharacterized oxidoreductase YgbJ                                | COG2084 | I | 100.00 | 100.00 |
| RCA23_c02640 | hypothetical protein, xylose isomerase-like                        | COG1082 | G | 100.00 | 100.00 |
| RCA23_c02650 | glyoxylate reductase GyaR                                          | COG1052 | C | 100.00 | 100.00 |
| RCA23_c02660 | hypothetical protein                                               |         |   | 100.00 | 100.00 |
| RCA23_c02670 | hypothetical protein, AzIC-like                                    | COG1296 | E | 100.00 | 27.02  |
| RCA23_c02680 | cbbT/tktB: transketolase                                           | COG0021 | G | 43.25  | 14.48  |
| RCA23_c02690 | hypothetical protein                                               | COG4091 | E | 0.00   | 0.00   |
| RCA23_c02700 | transketolase, alpha subunit                                       | COG3959 | G | 43.65  | 0.00   |
| RCA23_c02710 | transketolase, beta-subunit                                        | COG3958 | G | 100.00 | 22.22  |
| RCA23_c02720 | putative 3-hydroxyisobutyrate dehydrogenase                        | COG2084 | I | 49.38  | 0.00   |
| RCA23_c02730 | putative 3-hydroxyisobutyrate dehydrogenase                        | COG2084 | I | 100.00 | 22.31  |
| RCA23_c02740 | 3-oxoacyl-[acyl-carrier-protein] reductase FabG                    | COG1028 | I | 100.00 | 0.00   |
| RCA23_c02750 | HTH-type transcriptional regulator, LysR family                    | COG0583 | K | 100.00 | 0.10   |
| RCA23_c02760 | putative HTH-type transcriptional regulator, GntR family           | COG1802 | K | 100.00 | 15.72  |
| RCA23_c02770 | TRAP dicarboxylate transporter, subunit DctP                       | COG4663 | Q | 14.10  | 0.00   |
| RCA23_c02780 | TRAP dicarboxylate transporter, subunit DctQ                       | COG4665 | Q | 100.00 | 44.33  |
| RCA23_c02800 | hypothetical protein                                               | COG0240 | C | 100.00 | 0.00   |
| RCA23_c02810 | hypothetical protein DUF1537                                       | COG3395 | S | 46.88  | 0.00   |
| RCA23_c02820 | putative ribulose biphosphate carboxylase large chain              | COG1850 | G | 72.70  | 0.00   |
| RCA23_c02830 | hypothetical protein, NAD dependent epimerase / dehydratase family | COG0451 | M | 100.00 | 0.00   |
| RCA23_c02840 | 2-hydroxy-3-oxopropionate reductase GarR                           | COG2084 | I | 100.00 | 26.84  |
| RCA23_c02850 | hypothetical protein                                               |         |   | 7.71   | 0.00   |
| RCA23_c02860 | altronate hydrolase UxaA                                           | COG2721 | G | 31.20  | 94.15  |
| RCA23_c02870 | putative oxidoreductase                                            | COG0673 | R | 100.00 | 100.00 |
| RCA23_c02880 | 2-hydroxy-3-oxopropionate reductase GarR                           | COG2084 | I | 100.00 | 98.20  |
| RCA23_c02890 | S-adenosylmethionine uptake transporter Sam                        | COG0697 | G | 100.00 | 100.00 |
| RCA23_c02900 | 2-dehydro-3-deoxygluconokinase KdgK                                | COG0524 | G | 100.00 | 100.00 |
| RCA23_c02910 | D-mannonate oxidoreductase UxuB                                    | COG0246 | G | 100.00 | 100.00 |
| RCA23_c02920 | uronate isomerase UxaC                                             | COG1904 | G | 100.00 | 100.00 |
| RCA23_c02930 | putative oxidoreductase                                            | COG0673 | R | 100.00 | 100.00 |
| RCA23_c02940 | putative oxidoreductase                                            | COG0673 | R | 100.00 | 100.00 |

|              |                                                                                |         |   |        |        |
|--------------|--------------------------------------------------------------------------------|---------|---|--------|--------|
| RCA23_c02950 | putative oxidoreductase                                                        | COG0673 | R | 100.00 | 100.00 |
| RCA23_c02960 | mannonate dehydratase UxuA                                                     | COG1312 | G | 100.00 | 100.00 |
| RCA23_c02970 | long-chain-fatty-acid--CoA ligase                                              | COG0318 | I | 100.00 | 100.00 |
| RCA23_c02980 | D-beta-hydroxybutyrate dehydrogenase BdhA                                      | COG1028 | I | 100.00 | 100.00 |
| RCA23_c02990 | copper-transporting P-type ATPase ActP                                         | COG2217 | P | 100.00 | 100.00 |
| RCA23_c03000 | HTH-type transcriptional regulator (copper efflux regulator)                   | COG0789 | K | 100.00 | 100.00 |
| RCA23_c03010 | hypothetical protein                                                           | COG3937 | S | 100.00 | 100.00 |
| RCA23_c03020 | hypothetical protein                                                           |         |   | 100.00 | 100.00 |
| RCA23_c03030 | isocitrate dehydrogenase Icd                                                   | COG2838 | C | 91.78  | 100.00 |
| RCA23_c03040 | integral membrane protein DUF6                                                 | COG0697 | G | 100.00 | 100.00 |
| RCA23_c03050 | flavocytochrome c cytochrome subunit SoxE                                      | COG3474 | C | 100.00 | 100.00 |
| RCA23_c03060 | sulfide dehydrogenase [flavocytochrome c] flavoprotein chain SoxF              | COG0446 | R | 100.00 | 100.00 |
| RCA23_c03070 | hypothetical protein, OsmC-like                                                | COG1764 | O | 100.00 | 100.00 |
| RCA23_c03080 | putative dimethyl sulfoniopropionate demethylase DmdA                          | COG0404 | E | 100.00 | 99.83  |
| RCA23_c03090 | transcriptional regulator, AsnC family                                         | COG1522 | K | 100.00 | 100.00 |
| RCA23_c03100 | glutathione S-transferase                                                      | COG0625 | O | 0.00   | 0.00   |
| RCA23_c03120 | hypothetical protein, ribonuclease, E/G family                                 | COG1530 | J | 87.39  | 100.00 |
| RCA23_c03130 | Maf-like protein                                                               | COG0424 | D | 100.00 | 100.00 |
| RCA23_c03140 | translation initiation factor IF-1                                             | COG0361 | J | 100.00 | 100.00 |
| RCA23_c03150 | hypothetical protein, low molecular weight phosphotyrosine protein phosphatase | COG0394 | T | 76.44  | 100.00 |
| RCA23_c03160 | hypothetical protein UPF0262                                                   | COG5328 | S | 32.08  | 100.00 |
| RCA23_c03170 | histidinol dehydrogenase HisD                                                  | COG0141 | E | 100.00 | 100.00 |
| RCA23_c03180 | hypothetical protein                                                           |         |   | 100.00 | 100.00 |
| RCA23_c03190 | UDP-N-acetylglucosamine 1-carboxyvinyltransferase MurA                         | COG0766 | M | 100.00 | 100.00 |
| RCA23_c03210 | PAS/PAC sensor hybrid histidine kinase                                         | COG0642 | T | 100.00 | 95.59  |
| RCA23_c03220 | 2OG-Fe(II) oxygenase                                                           | COG3491 | R | 99.62  | 85.93  |
| RCA23_c03230 | putative lysine exporter protein                                               | COG1280 | E | 77.52  | 67.91  |
| RCA23_c03240 | putative carbon monoxide dehydrogenase subunit G                               | COG3427 | S | 100.00 | 100.00 |
| RCA23_c03250 | hypothetical protein, XdhC and CoxI family                                     | COG1975 | O | 100.00 | 95.16  |
| RCA23_c03260 | putative MFS-type transporter                                                  | COG2814 | G | 93.00  | 100.00 |
| RCA23_c03270 | AFG1-like ATPase                                                               | COG1485 | R | 73.77  | 89.30  |
| RCA23_c03280 | bifunctional protein FolC                                                      | COG0285 | H | 100.00 | 100.00 |
| RCA23_c03290 | acetyl-coenzyme A carboxylase carboxyl transferase beta subunit AccD           | COG0777 | I | 100.00 | 100.00 |

|              |                                                                |         |   |        |        |
|--------------|----------------------------------------------------------------|---------|---|--------|--------|
| RCA23_c03300 | hypothetical protein, CAAX amino terminal protease-like        | COG1266 | R | 100.00 | 100.00 |
| RCA23_c03310 | dihydroxy-acid dehydratase IlvD                                | COG0129 | E | 100.00 | 96.08  |
| RCA23_c03320 | hypothetical protein                                           |         |   | 100.00 | 100.00 |
| RCA23_c03330 | hypothetical protein                                           |         |   | 100.00 | 100.00 |
| RCA23_c03340 | hypothetical protein                                           |         |   | 100.00 | 100.00 |
| RCA23_c03350 | hypothetical protein, OmpA family                              | COG2885 | M | 100.00 | 100.00 |
| RCA23_c03360 | hypothetical protein, peroxidase-like protein                  | COG2128 | S | 100.00 | 100.00 |
| RCA23_c03370 | hypothetical protein, acetyltransferase-like                   | COG0456 | R | 100.00 | 100.00 |
| RCA23_c03380 | hypothetical protein, probably molybdopterin binding           | COG1058 | R | 100.00 | 100.00 |
| RCA23_c03390 | sugar fermentation stimulation protein SfsA                    | COG1489 | R | 100.00 | 100.00 |
| RCA23_c03400 | methionine aminopeptidase Map                                  | COG0024 | J | 100.00 | 100.00 |
| RCA23_c03410 | ATP-dependent RNA helicase RhE                                 | COG0513 | L | 100.00 | 100.00 |
| RCA23_c03420 | putative ribosomal RNA small subunit methyltransferase D       | COG0742 | L | 100.00 | 100.00 |
| RCA23_c03430 | rhodocoxin reductase ThcD                                      | COG0446 | R | 100.00 | 100.00 |
| RCA23_c03440 | peroxiredoxin                                                  | COG0678 | O | 100.00 | 100.00 |
| RCA23_c03450 | pterin-4-alpha-carbinolamine dehydratase                       | COG2154 | H | 100.00 | 100.00 |
| RCA23_c03460 | hypothetical protein DUF482                                    | COG3146 | S | 100.00 | 97.64  |
| RCA23_c03470 | putative glycerophosphoryl diester phosphodiesterase           | COG0584 | C | 100.00 | 100.00 |
| RCA23_c03480 | putative endoribonuclease L-PSP                                | COG0251 | J | 100.00 | 100.00 |
| RCA23_c03490 | type I secretion system protein, HlyD family                   | COG1566 | V | 100.00 | 87.35  |
| RCA23_c03500 | type I secretion system ATP-binding component                  | COG4618 | R | 100.00 | 100.00 |
| RCA23_c03510 | putative type I secretion system protein, transmembrane domain | COG4618 | R | 100.00 | 100.00 |
| RCA23_c03520 | VacJ like lipoprotein                                          | COG2853 | M | 100.00 | 100.00 |
| RCA23_c03530 | putative toluene tolerance protein                             | COG2854 | Q | 100.00 | 98.18  |
| RCA23_c03540 | penicillin-binding protein 1B                                  | COG0744 | M | 100.00 | 97.57  |
| RCA23_c03550 | aromatic-amino-acid aminotransferase TyrB                      | COG1448 | E | 100.00 | 100.00 |
| RCA23_c03560 | 3-mercaptopyruvate sulfurtransferase SseA                      | COG2897 | P | 100.00 | 100.00 |
| RCA23_c03570 | SsrA-binding protein SmpB                                      | COG0691 | O | 100.00 | 100.00 |
| RCA23_c03580 | dihydrodipicolinate synthase DapA                              | COG0329 | E | 100.00 | 100.00 |
| RCA23_c03590 | soluble lytic murein transglycosylase Slt                      | COG0741 | M | 100.00 | 100.00 |
| RCA23_c03600 | hypothetical protein DUF6 transmembrane                        | COG0697 | G | 100.00 | 100.00 |
| RCA23_c03610 | hypothetical protein DUF752                                    | COG4121 | S | 100.00 | 97.44  |
| RCA23_c03620 | putative FAD-dependent oxidoreductase                          | COG0665 | E | 100.00 | 100.00 |

|              |                                                                                   |         |   |        |        |
|--------------|-----------------------------------------------------------------------------------|---------|---|--------|--------|
| RCA23_c03630 | hypothetical protein, glyoxalase/dioxygenase superfamily                          | COG0346 | E | 100.00 | 100.00 |
| RCA23_c03640 | hypothetical protein                                                              |         |   | 100.00 | 100.00 |
| RCA23_c03650 | hypothetical protein                                                              |         |   | 100.00 | 100.00 |
| RCA23_c03660 | cob(I)yrinic acid a,c-diamide adenosyltransferase CobO                            | COG2109 | H | 100.00 | 100.00 |
| RCA23_c03670 | hypothetical protein                                                              |         |   | 100.00 | 100.00 |
| RCA23_c03680 | oligopeptide/dipeptide ABC transporter, ATP-binding protein                       | COG0444 | E | 100.00 | 100.00 |
| RCA23_c03690 | oligopeptide/dipeptide ABC transporter, ATP-binding protein                       | COG0444 | E | 100.00 | 87.27  |
| RCA23_c03700 | oligopeptide/dipeptide ABC transporter, permease protein                          | COG1173 | E | 100.00 | 100.00 |
| RCA23_c03710 | oligopeptide/dipeptide ABC transporter, permease protein                          | COG0601 | E | 100.00 | 100.00 |
| RCA23_c03720 | oligopeptide/dipeptide ABC transporter, periplasmic substrate-binding protein     | COG0747 | E | 100.00 | 90.14  |
| RCA23_c03730 | HTH-type transcriptional regulator, LysR family                                   | COG0583 | K | 100.00 | 99.78  |
| RCA23_c03740 | putative amidohydrolase 3                                                         | COG1574 | R | 100.00 | 84.16  |
| RCA23_c03750 | cobalamin biosynthesis CobW-like                                                  | COG0523 | R | 100.00 | 100.00 |
| RCA23_c03760 | hypothetical protein, restriction endonuclease type IV-like                       | COG4127 | S | 100.00 | 93.58  |
| RCA23_c03770 | glycine betaine transport ATP-binding protein OpuAA                               | COG4175 | E | 100.00 | 97.85  |
| RCA23_c03780 | glycine betaine transport system permease protein OpuAB                           | COG4176 | E | 95.35  | 100.00 |
| RCA23_c03790 | glycine betaine transporter substrate-binding protein OpuAC                       | COG2113 | E | 100.00 | 100.00 |
| RCA23_c03800 | fatty acid desaturase                                                             | COG3239 | I | 100.00 | 100.00 |
| RCA23_c03810 | CoA-transferase family III protein involved in DMSP degradation                   | COG1804 | C | 100.00 | 100.00 |
| RCA23_c03820 | glyceraldehyde-3-phosphate dehydrogenase Gap                                      | COG0057 | G | 100.00 | 100.00 |
| RCA23_c03830 | ATP-dependent Clp protease proteolytic subunit ClpP                               | COG0740 | O | 91.95  | 100.00 |
| RCA23_c03840 | ATP-dependent Clp protease ATP-binding subunit ClpX                               | COG1219 | O | 100.00 | 99.53  |
| RCA23_c03850 | putative NADH ubiquinone oxidoreductase subunit NDUFA12                           | COG3761 | C | 100.00 | 100.00 |
| RCA23_c03860 | ABC-type transport system involved in resistance to organic solvents, periplasmic | COG1463 | Q | 100.00 | 100.00 |
| RCA23_c03870 | Uncharacterized protein conserved in bacteria (DUF2155)                           | COG4765 | S | 100.00 | 100.00 |
| RCA23_c03880 | leucyl/phenylalanyl-tRNA--protein transferase Aat                                 | COG2360 | O | 100.00 | 100.00 |
| RCA23_c03890 | biotin carboxylase AccC                                                           | COG4770 | I | 100.00 | 100.00 |
| RCA23_c03900 | acetyl-coenzyme A synthase AcsA                                                   | COG0365 | I | 100.00 | 100.00 |
| RCA23_c03910 | high-affinity branched-chain amino acid transport ATP-binding protein LivF        | COG0410 | E | 100.00 | 100.00 |
| RCA23_c03920 | high-affinity branched-chain amino acid transport ATP-binding protein BraF        | COG0411 | E | 14.62  | 100.00 |
| RCA23_c03930 | putative branched-chain amino acid transport system permease protein              | COG4177 | E | 100.00 | 92.60  |
| RCA23_c03940 | putative branched-chain amino acid transport system permease protein              | COG0559 | E | 100.00 | 100.00 |
| RCA23_c03950 | hypothetical protein                                                              | COG0683 | E | 100.00 | 100.00 |

|              |                                                                          |         |   |      |        |        |
|--------------|--------------------------------------------------------------------------|---------|---|------|--------|--------|
| RCA23_c03960 | hypothetical protein, DNA binding helix-turn helix proteins              | COG1396 | K |      | 100.00 | 100.00 |
| RCA23_c03970 | putative response regulator receiver protein, CheY like                  | COG0745 | T |      | 100.00 | 100.00 |
| RCA23_c03980 | hypothetical protein                                                     |         |   |      | 100.00 | 100.00 |
| RCA23_c03990 | sensor protein kinase Walk                                               | COG0591 | E |      | 100.00 | 100.00 |
| RCA23_c04000 | hypothetical protein DUF442                                              | COG3453 | S |      | 100.00 | 100.00 |
| RCA23_c04010 | hypothetical protein                                                     |         |   |      | 100.00 | 100.00 |
| RCA23_c04020 | hypothetical protein                                                     | COG3750 | S |      | 100.00 | 100.00 |
| RCA23_c04030 | hypothetical protein                                                     |         |   |      | 100.00 | 100.00 |
| RCA23_c04040 | putative Fe(3+)-transport system protein SfuB                            | COG1178 | P |      | 100.00 | 100.00 |
| RCA23_c04060 | integrase                                                                | COG0582 | L | GI 2 | 33.16  | 20.26  |
| RCA23_c04070 | hypothetical protein                                                     | COG3945 | S | GI 2 | 0.00   | 0.00   |
| RCA23_c04080 | hypothetical protein                                                     |         |   | GI 2 | 0.00   | 22.80  |
| RCA23_c04090 | UDP-N-acetylglucosamine--peptide N-acetylglucosaminyltransferase subunit | COG0457 | R | GI 2 | 0.00   | 15.98  |
| RCA23_c04100 | esterase, SGNH hydrolase-type                                            | COG2755 | E | GI 2 | 0.00   | 0.00   |
| RCA23_c04110 | hypothetical protein                                                     |         |   | GI 2 | 0.00   | 97.49  |
| RCA23_c04120 | hypothetical protein, tetratricopeptide repeat                           | COG0790 | R | GI 2 | 0.00   | 47.47  |
| RCA23_c04130 | hypothetical protein                                                     |         |   | GI 2 | 100.00 | 89.46  |
| RCA23_c04140 | hypothetical protein                                                     |         |   | GI 2 | 100.00 | 100.00 |
| RCA23_c04150 | hypothetical protein                                                     |         |   | GI 2 | 100.00 | 100.00 |
| RCA23_c04160 | hypothetical protein, RmlC-like cupin family                             | COG3450 | R | GI 2 | 0.00   | 39.42  |
| RCA23_c04170 | hypothetical protein                                                     |         |   | GI 2 | 0.00   | 71.47  |
| RCA23_c04180 | hypothetical protein, DUF3127                                            |         |   | GI 2 | 0.00   | 100.00 |
| RCA23_c04190 | putative nucleoside triphosphate hydrolase, ATPase domain                | COG1066 | O | GI 2 | 0.00   | 29.78  |
| RCA23_c04200 | zinc-dependent metalloprotease                                           | COG2931 | Q | GI 2 | 65.16  | 41.30  |
| RCA23_c04210 | HTH-type transcriptional regulator, AsnC family                          | COG1522 | K | GI 2 | 100.00 | 100.00 |
| RCA23_c04220 | integrase                                                                | COG2801 | L | GI 2 | 0.00   | 0.00   |
| RCA23_c04230 | putative ion channel                                                     |         |   | GI 2 | 96.98  | 100.00 |
| RCA23_c04240 | integrase                                                                | COG4974 | L | GI 2 | 100.00 | 72.51  |
| RCA23_c04250 | Gcn5-like N-acetyltransferase                                            | COG1670 | J | GI 2 | 0.00   | 0.00   |
| RCA23_c04260 | integrase                                                                | COG0582 | L | GI 2 | 36.10  | 94.11  |
| RCA23_c04280 | hypothetical protein, NAD dependent epimerase / dehydratase family       | COG0702 | M |      | 100.00 | 100.00 |
| RCA23_c04290 | undecaprenyl-diphosphatase UppP                                          | COG1968 | V |      | 100.00 | 100.00 |
| RCA23_c04300 | glutamate synthase [NADPH] small chain GltD                              | COG0493 | E |      | 100.00 | 100.00 |

|              |                                                                         |         |   |        |        |
|--------------|-------------------------------------------------------------------------|---------|---|--------|--------|
| RCA23_c04310 | glutamate synthase [NADPH] large chain GltB                             | COG0069 | E | 100.00 | 99.98  |
| RCA23_c04320 | monofunctional biosynthetic peptidoglycan transglycosylase MtgA         | COG0744 | M | 100.00 | 97.45  |
| RCA23_c04330 | putative glutathione S-transferase                                      | COG0625 | O | 100.00 | 100.00 |
| RCA23_c04340 | putative electron transport protein yjeS                                | COG1600 | C | 100.00 | 100.00 |
| RCA23_c04360 | hypothetical protein                                                    | COG5266 | P | 100.00 | 100.00 |
| RCA23_c04350 | hypothetical protein                                                    |         |   | 100.00 | 100.00 |
| RCA23_c04370 | branched-chain-amino-acid aminotransferase IlvE                         | COG0115 | E | 100.00 | 100.00 |
| RCA23_c04380 | HTH-type transcriptional regulator PetP                                 | COG1846 | K | 100.00 | 100.00 |
| RCA23_c04390 | protein PetR                                                            | COG0745 | T | 100.00 | 100.00 |
| RCA23_c04400 | putative deacytelase, histone deacetylase superfamily protein-like      | COG0123 | B | 100.00 | 100.00 |
| RCA23_c04410 | exodeoxyribonuclease 7 small subunit XseB                               | COG1722 | L | 100.00 | 100.00 |
| RCA23_c04420 | geranyltranstransferase IspA                                            | COG0142 | H | 91.64  | 100.00 |
| RCA23_c04430 | 1-deoxy-D-xylulose-5-phosphate synthase Dxs                             | COG1154 | H | 100.00 | 97.90  |
| RCA23_c04440 | hypothetical protein, NAD dependent epimerase/dehydratase               | COG0451 | M | 100.00 | 100.00 |
| RCA23_c04450 | hypothetical protein                                                    |         |   | 100.00 | 100.00 |
| RCA23_c04460 | hypothetical protein                                                    |         |   | 100.00 | 100.00 |
| RCA23_c04470 | carnitiny-CoA dehydratase CaiD                                          | COG1024 | I | 100.00 | 100.00 |
| RCA23_c04480 | hypothetical protein, CoA-binding                                       | COG1042 | C | 100.00 | 98.47  |
| RCA23_c04490 | putative acyl-CoA dehydrogenase YngJ                                    | COG1960 | I | 100.00 | 100.00 |
| RCA23_c04500 | transcriptional regulator, AraC family                                  | COG4977 | K | 100.00 | 100.00 |
| RCA23_c04510 | class II aldolase                                                       | COG0235 | G | 100.00 | 100.00 |
| RCA23_c04520 | arsenate reductase ArsC                                                 | COG1393 | P | 100.00 | 100.00 |
| RCA23_c04530 | adenine deaminase Ade                                                   | COG1001 | F | 100.00 | 100.00 |
| RCA23_c04540 | AMP nucleosidase Amn                                                    | COG0775 | F | 100.00 | 92.89  |
| RCA23_c04550 | DNA-binding protein HU                                                  | COG0776 | L | 100.00 | 100.00 |
| RCA23_c04560 | inner membrane protein DUF6                                             | COG0697 | G | 100.00 | 100.00 |
| RCA23_c04570 | hypothetical protein, cytochrome C biogenesis protein                   | COG0785 | O | 100.00 | 100.00 |
| RCA23_c04580 | hypothetical protein, thioredoxin                                       | COG0526 | O | 100.00 | 100.00 |
| RCA23_c04590 | hypothetical protein                                                    | COG3222 | S | 100.00 | 100.00 |
| RCA23_c04600 | succinyl-diaminopimelate desuccinylase DapE                             | COG0624 | E | 100.00 | 98.32  |
| RCA23_c04610 | hypothetical protein                                                    |         |   | 100.00 | 100.00 |
| RCA23_c04620 | 2,3,4,5-tetrahydropyridine-2,6-dicarboxylate N-succinyltransferase DapD | COG2171 | E | 100.00 | 100.00 |
| RCA23_c04630 | L-threonine ammonia-lyase                                               | COG1171 | E | 100.00 | 100.00 |

|              |                                                                  |         |   |        |        |
|--------------|------------------------------------------------------------------|---------|---|--------|--------|
| RCA23_c04640 | ribosomal RNA large subunit methyltransferase N                  | COG0820 | R | 100.00 | 100.00 |
| RCA23_c04650 | hypothetical protein                                             |         |   | 100.00 | 100.00 |
| RCA23_c04660 | L-asparaginase II                                                | COG4448 | E | 100.00 | 100.00 |
| RCA23_c04670 | phosphoserine phosphatase SerB                                   | COG0560 | E | 100.00 | 100.00 |
| RCA23_c04680 | hypothetical protein                                             |         |   | 100.00 | 100.00 |
| RCA23_c04690 | phosphoserine aminotransferase SerC                              | COG1932 | H | 100.00 | 100.00 |
| RCA23_c04700 | D-3-phosphoglycerate dehydrogenase SerA                          | COG0111 | H | 100.00 | 100.00 |
| RCA23_c04710 | metallophosphoesterase                                           |         |   | 100.00 | 100.00 |
| RCA23_c04720 | RNA pyrophosphohydrolase RppH                                    | COG0494 | L | 100.00 | 100.00 |
| RCA23_c04730 | carboxy-terminal-processing protease CtpA                        | COG0793 | M | 100.00 | 100.00 |
| RCA23_c04740 | 2,3-bisphosphoglycerate-independent phosphoglycerate mutase GpmI | COG0696 | G | 100.00 | 100.00 |
| RCA23_c04750 | putative protein ImuB                                            |         |   | 100.00 | 100.00 |
| RCA23_c04760 | hypothetical protein                                             |         |   | 100.00 | 100.00 |
| RCA23_c04770 | hypothetical protein, NlpC/P60                                   | COG0791 | M | 100.00 | 100.00 |
| RCA23_c04780 | putative cytosol aminopeptidase PepA                             | COG0260 | E | 100.00 | 100.00 |
| RCA23_c04790 | hypothetical protein                                             |         |   | 100.00 | 100.00 |
| RCA23_c04800 | carbonic anhydrase CynT                                          | COG0288 | P | 100.00 | 100.00 |
| RCA23_c04810 | aspartate-semialdehyde dehydrogenase Asd                         | COG0136 | E | 100.00 | 100.00 |
| RCA23_c04820 | MFS-type transporter                                             | COG2223 | P | 100.00 | 93.28  |
| RCA23_c04830 | short chain dehydrogenase                                        | COG4221 | R | 100.00 | 100.00 |
| RCA23_c04840 | FAD dependent oxidoreductase                                     | COG0665 | E | 100.00 | 100.00 |
| RCA23_c04850 | trimethylamine methyltransferase MttB                            | COG5598 | H | 100.00 | 100.00 |
| RCA23_c04860 | aldehyde dehydrogenase                                           | COG1012 | C | 100.00 | 100.00 |
| RCA23_c04870 | dihydrodipicolinate synthase DapA                                | COG0329 | E | 100.00 | 100.00 |
| RCA23_c04880 | transcriptional regulator, GntR family                           | COG1802 | K | 100.00 | 100.00 |
| RCA23_c04890 | hypothetical protein                                             |         |   | 100.00 | 100.00 |
| RCA23_c04900 | isopropylmalate dehydrogenase LeuB                               | COG0473 | C | 100.00 | 100.00 |
| RCA23_c04910 | hypothetical protein                                             |         |   | 100.00 | 100.00 |
| RCA23_c04920 | 3-isopropylmalate dehydratase small subunit LeuD                 | COG0066 | E | 100.00 | 100.00 |
| RCA23_c04930 | 3-isopropylmalate dehydratase large subunit LeuC                 | COG0065 | E | 100.00 | 99.50  |
| RCA23_c04940 | hypothetical protein, DUF2975                                    |         |   | 100.00 | 92.13  |
| RCA23_c04950 | hypothetical protein DUF143                                      | COG0799 | S | 100.00 | 100.00 |
| RCA23_c04960 | ribosomal RNA large subunit methyltransferase H                  | COG1576 | S | 100.00 | 100.00 |

|              |                                                                            |         |   |        |        |
|--------------|----------------------------------------------------------------------------|---------|---|--------|--------|
| RCA23_c04970 | alcohol dehydrogenase class-3 AdhI                                         | COG1062 | C | 100.00 | 100.00 |
| RCA23_c04980 | putative membrane transport protein                                        | COG0679 | R | 100.00 | 100.00 |
| RCA23_c04990 | S-formylglutathione hydrolase YeiG                                         | COG0627 | R | 100.00 | 100.00 |
| RCA23_c05000 | soluble pyridine nucleotide transhydrogenase                               | COG1249 | C | 100.00 | 100.00 |
| RCA23_c05010 | hypothetical protein DUF188                                                | COG1671 | S | 100.00 | 100.00 |
| RCA23_c05020 | putative integral membrane protein                                         | COG0697 | G | 100.00 | 100.00 |
| RCA23_c05030 | putative HAD-superfamily hydrolase                                         | COG1011 | R | 100.00 | 100.00 |
| RCA23_c05040 | putative ornithine cyclodeaminase                                          | COG2423 | E | 100.00 | 97.47  |
| RCA23_c05050 | aerobic cobaltochelataase subunit CobN                                     | COG1429 | H | 100.00 | 100.00 |
| RCA23_c05060 | hypothetical protein, acetyltransferase-like                               | COG0456 | R | 100.00 | 100.00 |
| RCA23_c05070 | protein CobW                                                               | COG0523 | R | 100.00 | 91.48  |
| RCA23_c05080 | hypothetical protein DUF1636                                               | COG5469 | S | 100.00 | 100.00 |
| RCA23_c05090 | possible cobalt transporter, subunit CbtA                                  | COG5446 | S | 100.00 | 100.00 |
| RCA23_c05100 | Cytochrome c peroxidase                                                    | COG1858 | P | 100.00 | 100.00 |
| RCA23_c05110 | hypothetical protein                                                       | COG4188 | R | 100.00 | 87.50  |
| RCA23_c05120 | hypothetical protein                                                       |         |   | 42.94  | 100.00 |
| RCA23_c05130 | xylose repressor XylR                                                      | COG1940 | K | 90.90  | 100.00 |
| RCA23_c05140 | D-xylose-binding periplasmic protein XylF                                  | COG4213 | G | 100.00 | 100.00 |
| RCA23_c05150 | xylose transport system permease protein XylH                              | COG4214 | G | 100.00 | 100.00 |
| RCA23_c05160 | xylose ABC transporter, ATP-binding protein XylG                           | COG1129 | G | 100.00 | 100.00 |
| RCA23_c05170 | xylulose kinase XylB                                                       | COG1070 | G | 100.00 | 100.00 |
| RCA23_c05180 | xylose isomerase XylA                                                      | COG2115 | G | 100.00 | 95.85  |
| RCA23_c05190 | long-chain-fatty-acid--CoA ligase LcfB                                     | COG0318 | I | 100.00 | 98.16  |
| RCA23_c05200 | malonyl-CoA decarboxylase                                                  |         |   | 100.00 | 98.72  |
| RCA23_c05210 | acyl-CoA dehydrogenase                                                     | COG1960 | I | 100.00 | 98.98  |
| RCA23_c05220 | hypothetical protein DUF81                                                 |         |   | 100.00 | 99.63  |
| RCA23_c05230 | phosphoenolpyruvate carboxykinase PckA                                     | COG1866 | C | 100.00 | 98.71  |
| RCA23_c05240 | two component signal transduction response regulator receiver protein ChvI | COG0745 | T | 100.00 | 96.15  |
| RCA23_c05250 | two component signal transduction histidine kinase ChvG                    | COG0642 | T | 100.00 | 100.00 |
| RCA23_c05260 | hypothetical protein, HPr serine kinase                                    | COG1493 | T | 100.00 | 76.41  |
| RCA23_c05270 | putative P-loop containing ATPase                                          | COG1660 | R | 100.00 | 100.00 |
| RCA23_c05280 | hypothetical protein, PTS system mannose-specific EIIA component           | COG2893 | G | 100.00 | 100.00 |
| RCA23_c05290 | phosphocarrier protein NPr                                                 | COG1925 | G | 100.00 | 100.00 |



|              |                                                                    |         |   |        |        |
|--------------|--------------------------------------------------------------------|---------|---|--------|--------|
| RCA23_c05300 | electron transfer flavoprotein alpha subunit EtfA                  | COG2025 | C | 100.00 | 93.66  |
| RCA23_c05310 | electron transfer flavoprotein beta subunit EtfB                   | COG2086 | C | 100.00 | 100.00 |
| RCA23_c05320 | cob(I)yrinic acid a,c-diamide adenosyltransferase CobO             | COG2096 | S | 100.00 | 100.00 |
| RCA23_c05330 | putative short chain dehydrogenase                                 | COG4221 | R | 100.00 | 100.00 |
| RCA23_c05340 | DNA topoisomerase 4 subunit A                                      | COG0188 | L | 100.00 | 100.00 |
| RCA23_c05350 | hypothetical protein DUF898                                        | COG4269 | S | 54.73  | 98.47  |
| RCA23_c05360 | peptidase M48 Ste24p                                               | COG4783 | R | 96.95  | 93.73  |
| RCA23_c05370 | hypothetical protein                                               |         |   | 100.00 | 100.00 |
| RCA23_c05380 | elongation factor Tu (EF-Tu)                                       | COG0050 | J | 100.00 | 34.35  |
| RCA23_c05400 | hypothetical protein, DUF560                                       |         |   | 100.00 | 100.00 |
| RCA23_c05410 | hippurate hydrolase HipO                                           | COG1473 | R | 100.00 | 98.89  |
| RCA23_c05420 | glutathione import ATP-binding protein GsiA                        | COG1123 | R | 100.00 | 90.41  |
| RCA23_c05430 | oligopeptide-binding protein AppA                                  | COG0747 | E | 100.00 | 100.00 |
| RCA23_c05440 | oligopeptide transport system permease protein AppB                | COG0601 | E | 100.00 | 100.00 |
| RCA23_c05450 | oligopeptide transport system permease protein AppC                | COG1173 | E | 100.00 | 100.00 |
| RCA23_c05460 | ABC transporter ATP-binding protein                                | COG1131 | V | 100.00 | 100.00 |
| RCA23_c05470 | inner membrane transport permease                                  | COG0842 | V | 100.00 | 95.54  |
| RCA23_c05480 | hypothetical protein, peptidase family S49                         | COG0616 | O | 100.00 | 99.75  |
| RCA23_c05490 | putative sodium/calcium exchanger protein                          | COG0530 | P | 100.00 | 100.00 |
| RCA23_c05500 | putative short cprotein                                            | COG1028 | I | 100.00 | 100.00 |
| RCA23_c05510 | UvrABC system protein C                                            | COG0322 | L | 100.00 | 100.00 |
| RCA23_c05520 | CDP-diacylglycerol--glycerol-3-phosphate 3-phosphatidyltransferase | COG0558 | I | 100.00 | 100.00 |
| RCA23_c05530 | molybdopterin-converting factor subunit MoaD                       | COG1977 | H | 100.00 | 100.00 |
| RCA23_c05540 | molybdopterin synthase catalytic subunit MoaE                      | COG0314 | H | 100.00 | 100.00 |
| RCA23_c05550 | hypothetical protein                                               |         |   | 100.00 | 89.09  |
| RCA23_c05560 | hypothetical protein, OmpA                                         | COG2885 | M | 100.00 | 100.00 |
| RCA23_c05570 | UbiA prenyltransferase                                             | COG0382 | H | 100.00 | 100.00 |
| RCA23_c05580 | RNA methyltransferase                                              | COG1385 | S | 100.00 | 100.00 |
| RCA23_c05590 | hypothetical protein                                               |         |   | 100.00 | 100.00 |
| RCA23_c05600 | glutamate--cysteine ligase                                         | COG3572 | H | 100.00 | 100.00 |
| RCA23_c05610 | glycerol-3-phosphate acyltransferase PlsY                          | COG0344 | S | 100.00 | 100.00 |
| RCA23_c05620 | dihydroorotase PyrC                                                | COG0044 | F | 100.00 | 95.87  |
| RCA23_c05630 | aspartate carbamoyltransferase PyrB                                | COG0540 | F | 100.00 | 100.00 |

|              |                                                                     |         |   |        |        |
|--------------|---------------------------------------------------------------------|---------|---|--------|--------|
| RCA23_c05640 | uracil DNA glycosylase family protein                               | COG1573 | L | 100.00 | 100.00 |
| RCA23_c05650 | molybdenum cofactor biosynthesis protein MoaB                       | COG0521 | H | 100.00 | 100.00 |
| RCA23_c05660 | putative efflux transporter, RND family, membrane fusion protein    | COG1566 | V | 100.00 | 100.00 |
| RCA23_c05670 | transporter, AcrB/AcrD/AcrF family                                  | COG0841 | V | 100.00 | 98.97  |
| RCA23_c05680 | hypothetical protein                                                | COG4233 | O | 100.00 | 100.00 |
| RCA23_c05690 | hypothetical protein DUF179                                         | COG1678 | K | 100.00 | 100.00 |
| RCA23_c05700 | acyl-CoA dehydrogenase                                              | COG1960 | I | 100.00 | 98.18  |
| RCA23_c05710 | putative metallo-beta-lactamase family protein                      | COG0491 | R | 100.00 | 100.00 |
| RCA23_c05720 | hypothetical protein                                                |         |   | 100.00 | 100.00 |
| RCA23_c05730 | putative branched-chain amino acid transport protein                | COG4392 | S | 100.00 | 100.00 |
| RCA23_c05740 | protein AzIC                                                        | COG1296 | E | 100.00 | 85.33  |
| RCA23_c05750 | formate dehydrogenase accessory protein FdhD                        | COG1526 | C | 100.00 | 100.00 |
| RCA23_c05760 | molybdopterin-guanine dinucleotide biosynthesis protein MobA        | COG0746 | H | 100.00 | 100.00 |
| RCA23_c05770 | molybdopterin-guanine dinucleotide biosynthesis protein MobB        | COG1763 | H | 100.00 | 97.79  |
| RCA23_c05780 | molybdopterin biosynthesis protein MoeA                             | COG0303 | H | 54.18  | 100.00 |
| RCA23_c05790 | transcription elongation factor GreA                                | COG0782 | K | 100.00 | 100.00 |
| RCA23_c05800 | electron transfer flavoprotein-ubiquinone oxidoreductase            | COG0644 | C | 100.00 | 100.00 |
| RCA23_c05810 | tetratricopeptide repeat-containing protein                         | COG0457 | R | 100.00 | 100.00 |
| RCA23_c05820 | 4-diphosphocytidyl-2C-methyl-D-erythritol 2-phosphate synthase IspE | COG1947 | I | 100.00 | 100.00 |
| RCA23_c05830 | octaprenyl-diphosphate synthase IspB                                | COG0142 | H | 100.00 | 99.80  |
| RCA23_c05840 | hypothetical protein, methyltransferase                             | COG4123 | R | 100.00 | 100.00 |
| RCA23_c05850 | acetoacetyl-CoA reductase PhaB                                      | COG1028 | I | 100.00 | 100.00 |
| RCA23_c05860 | acetyl-CoA acetyltransferase PhaA                                   | COG0183 | I | 100.00 | 100.00 |
| RCA23_c05870 | signaling protein                                                   | COG2200 | T | 100.00 | 100.00 |
| RCA23_c05880 | DNA-3-methyladenine glycosylase 1                                   | COG2818 | L | 100.00 | 100.00 |
| RCA23_c05890 | thiol:disulfide interchange protein TlpA                            | COG0526 | O | 100.00 | 100.00 |
| RCA23_c05900 | argininosuccinate lyase ArgH                                        | COG0165 | E | 100.00 | 100.00 |
| RCA23_c05910 | hypothetical protein                                                |         |   | 100.00 | 100.00 |
| RCA23_c05920 | diaminopimelate decarboxylase LysA                                  | COG0019 | E | 100.00 | 100.00 |
| RCA23_c05930 | hypothetical protein                                                | COG1196 | D | 86.19  | 99.92  |
| RCA23_c05940 | putative acyltransferase                                            | COG0204 | I | 100.00 | 100.00 |
| RCA23_c05950 | glyoxalase/bleomycin resistance protein                             | COG2764 | S | 100.00 | 100.00 |
| RCA23_c05960 | hypothetical protein, pyridoxamine 5'-phosphate oxidase             | COG3576 | R | 100.00 | 100.00 |

|              |                                                                       |         |   |        |        |
|--------------|-----------------------------------------------------------------------|---------|---|--------|--------|
| RCA23_c05970 | acetyl-coenzyme A carboxylase carboxyl transferase alpha subunit AccA | COG0825 | I | 100.00 | 100.00 |
| RCA23_c05980 | malyl-CoA ligase                                                      | COG2301 | G | 100.00 | 92.08  |
| RCA23_c05990 | hypothetical protein DUF1611                                          | COG3367 | S | 100.00 | 100.00 |
| RCA23_c06000 | L-Ala-D/L-Glu epimerase YcjG                                          | COG4948 | M | 100.00 | 100.00 |
| RCA23_c06010 | D-alanine aminotransferase Dat                                        | COG0115 | E | 100.00 | 100.00 |
| RCA23_c06020 | hypothetical, OmpA-like                                               |         |   | 93.16  | 100.00 |
| RCA23_c06030 | hypothetical protein                                                  | COG3743 | S | 100.00 | 100.00 |
| RCA23_c06040 | hypothetical protein DUF1244                                          | COG3492 | S | 100.00 | 98.35  |
| RCA23_c06050 | N-formylglutamate amidohydrolase                                      | COG3931 | E | 100.00 | 100.00 |
| RCA23_c06060 | pyruvate kinase PykF                                                  | COG0469 | G | 100.00 | 100.00 |
| RCA23_c06070 | hypothetical protein                                                  |         |   | 100.00 | 100.00 |
| RCA23_c06080 | 50S ribosomal protein L35                                             | COG0291 | J | 100.00 | 100.00 |
| RCA23_c06090 | 50S ribosomal protein L20                                             | COG0292 | J | 100.00 | 100.00 |
| RCA23_c06100 | putative subtilase family protein                                     | COG1404 | O | 74.74  | 100.00 |
| RCA23_c06110 | hypothetical protein                                                  |         |   | 100.00 | 100.00 |
| RCA23_c06120 | hypothetical protein, lipid A biosynthesis acyltransferase            | COG1560 | M | 100.00 | 94.50  |
| RCA23_c06130 | phenylalanyl-tRNA synthase alpha chain PheS                           | COG0016 | J | 100.00 | 91.34  |
| RCA23_c06140 | glutamine amidotransferase class-I                                    | COG0518 | F | 100.00 | 100.00 |
| RCA23_c06150 | phenylalanyl-tRNA synthase beta chain PheT                            | COG0072 | J | 100.00 | 100.00 |
| RCA23_c06160 | putative HTH-type transcriptional regulator                           | COG1522 | K | 100.00 | 100.00 |
| RCA23_c06170 | ribosomal protein S21                                                 | COG0828 | J | 100.00 | 100.00 |
| RCA23_c06180 | putative ubiquinone biosynthesis protein COQ9                         | COG5590 | S | 100.00 | 100.00 |
| RCA23_c06190 | putative quinone oxidoreductase                                       | COG0604 | C | 100.00 | 100.00 |
| RCA23_c06200 | hypothetical protein DUF1013                                          | COG3820 | S | 100.00 | 93.10  |
| RCA23_c06210 | recombination protein RecR                                            | COG0353 | L | 100.00 | 100.00 |
| RCA23_c06220 | hypothetical protein                                                  | COG0718 | S | 100.00 | 100.00 |
| RCA23_c06230 | DNA polymerase III subunit tau                                        | COG2812 | L | 100.00 | 98.44  |
| RCA23_c06240 | NADH pyrophosphatase Nudc                                             | COG2816 | L | 100.00 | 100.00 |
| RCA23_c06250 | hypothetical protein                                                  | COG3832 | S | 100.00 | 100.00 |
| RCA23_c06260 | prephenate dehydratase PheA                                           | COG0077 | E | 100.00 | 100.00 |
| RCA23_c06270 | cytochrome c-552                                                      | COG3474 | C | 100.00 | 100.00 |
| RCA23_c06280 | ABC transporter extracellular solute-binding protein                  | COG4166 | E | 100.00 | 100.00 |
| RCA23_c06290 | ABC transporter permease protein                                      | COG4174 | R | 100.00 | 100.00 |

|              |                                                           |         |   |      |        |        |
|--------------|-----------------------------------------------------------|---------|---|------|--------|--------|
| RCA23_c06300 | ABC transporter permease protein                          | COG4239 | R |      | 100.00 | 100.00 |
| RCA23_c06310 | putative oligopeptide ABC transporter ATP-binding protein | COG4172 | R |      | 100.00 | 98.99  |
| RCA23_c06320 | fumarylacetoacetate hydrolase family protein              | COG0179 | Q |      | 100.00 | 98.68  |
| RCA23_c06330 | D-alanyl-D-alanine carboxypeptidase DacF                  | COG1686 | M |      | 100.00 | 100.00 |
| RCA23_c06340 | haloacid dehalogenase domain protein hydrolase            | COG1011 | R |      | 100.00 | 100.00 |
| RCA23_c06350 | ATP-dependent Clp protease adapter protein ClpS           | COG2127 | S |      | 100.00 | 100.00 |
| RCA23_c06360 | putative methyltransferase                                | COG2813 | J |      | 100.00 | 100.00 |
| RCA23_c06370 | putative short chain dehydrogenase                        | COG1028 | I |      | 100.00 | 99.50  |
| RCA23_c06380 | coproporphyrinogen 3 oxidase, aerobic                     | COG0408 | H |      | 100.00 | 100.00 |
| RCA23_c06390 | oxidoreductase, FAD-binding protein                       | COG4097 | P |      | 100.00 | 93.60  |
| RCA23_c06400 | D-lactate dehydrogenase                                   | COG0277 | C |      | 100.00 | 100.00 |
| RCA23_c06420 | integrase                                                 |         |   | GI 3 | 98.18  | 62.52  |
| RCA23_c06430 | mandelate racemase                                        | COG4948 | M | GI 3 | 0.00   | 0.00   |
| RCA23_c06440 | fumarylacetoacetate hydrolase family protein              | COG0179 | Q | GI 3 | 0.00   | 0.00   |
| RCA23_c06450 | short-chain dehydrogenase/reductase                       | COG1028 | I | GI 3 | 0.00   | 0.00   |
| RCA23_c06460 | amidohydrolase                                            | COG3618 | R | GI 3 | 0.00   | 0.00   |
| RCA23_c06470 | aldo/keto reductase                                       | COG0667 | C | GI 3 | 0.00   | 0.00   |
| RCA23_c06480 | ABC transporter, permease protein                         | COG0600 | P | GI 3 | 0.00   | 0.00   |
| RCA23_c06490 | ABC transporter, permease protein                         | COG0600 | P | GI 3 | 0.00   | 0.00   |
| RCA23_c06500 | hypothetical protein                                      |         |   | GI 3 | 0.00   | 0.00   |
| RCA23_c06510 | sulfonate/nitrate ABC transporter, ATPase                 | COG1116 | P | GI 3 | 0.00   | 0.00   |
| RCA23_c06520 | ABC transporter, periplasmic substrate-binding protein    | COG0715 | P | GI 3 | 0.00   | 0.00   |
| RCA23_c06530 | arylsulfatase                                             | COG3119 | P | GI 3 | 51.23  | 0.00   |
| RCA23_c06540 | transcriptional regulator, GntR family                    | COG1802 | K | GI 3 | 100.00 | 0.00   |
| RCA23_c06550 | hypothetical protein                                      | COG4974 | L | GI 3 | 1.94   | 0.00   |
| RCA23_c06560 | hypothetical protein                                      | COG1618 | F | GI 3 | 100.00 | 0.00   |
| RCA23_c06570 | hypothetical protein                                      |         |   | GI 3 | 100.00 | 99.63  |
| RCA23_c06580 | hypothetical protein                                      |         |   | GI 3 | 100.00 | 56.03  |
| RCA23_c06590 | hypothetical protein                                      |         |   | GI 3 | 100.00 | 89.19  |
| RCA23_c06600 | hypothetical protein                                      |         |   | GI 3 | 94.99  | 100.00 |
| RCA23_c06610 | hypothetical protein                                      |         |   | GI 3 | 100.00 | 100.00 |
| RCA23_c06620 | hypothetical protein                                      |         |   | GI 3 | 100.00 | 100.00 |
| RCA23_c06630 | hypothetical protein                                      | COG3000 | I | GI 3 | 0.00   | 72.84  |

|              |                                                                    |         |   |      |        |        |
|--------------|--------------------------------------------------------------------|---------|---|------|--------|--------|
| RCA23_c06640 | transcriptional regulator, AsnC family                             | COG1522 | K | GI 3 | 100.00 | 100.00 |
| RCA23_c06650 | aspartate aminotransferase AspC                                    | COG0436 | E | GI 3 | 100.00 | 94.71  |
| RCA23_c06660 | 3-hydroxybutyrate dehydrogenase Bdh                                | COG1028 | I | GI 3 | 99.20  | 100.00 |
| RCA23_c06670 | putative fumarylacetoacetate hydrolase                             | COG0179 | Q | GI 3 | 0.00   | 67.72  |
| RCA23_c06680 | oxidoreductase, short chain dehydrogenase/reductase family protein | COG1028 | I | GI 3 | 0.00   | 75.17  |
| RCA23_c06690 | dimethylmenaquinone methyltransferase                              | COG0684 | H | GI 3 | 0.00   | 98.95  |
| RCA23_c06700 | hypothetical protein                                               | COG3970 | R | GI 3 | 0.00   | 94.60  |
| RCA23_c06710 | NADP-dependent fatty aldehyde dehydrogenase AldH                   | COG1012 | C | GI 3 | 0.00   | 75.96  |
| RCA23_c06720 | putative dihydrodipicolinate synthase                              | COG0329 | E | GI 3 | 0.00   | 70.75  |
| RCA23_c06730 | transcriptional regulator protein, LacI family                     | COG1609 | K | GI 3 | 0.00   | 73.33  |
| RCA23_c06740 | TRAP dicarboxylate transporter, subunit DctP                       | COG1638 | G | GI 3 | 0.00   | 80.34  |
| RCA23_c06750 | TRAP dicarboxylate transporter, subunit DctQ                       | COG3090 | G | GI 3 | 0.00   | 62.24  |
| RCA23_c06760 | TRAP dicarboxylate transporter, subunit DctM                       | COG1593 | G | GI 3 | 0.00   | 78.96  |
| RCA23_c06770 | D-amino acid dehydrogenase small subunit DadA                      | COG0665 | E | GI 3 | 0.00   | 83.92  |
| RCA23_c06780 | mandelate racemase/muconate lactonizing protein                    | COG4948 | M | GI 3 | 53.61  | 78.24  |
| RCA23_c06790 | dihydrodipicolinate synthase DapA                                  | COG0329 | E | GI 3 | 100.00 | 64.59  |
| RCA23_c06800 | uncharacterized oxidoreductase, YjmC                               | COG2055 | C | GI 3 | 57.07  | 88.13  |
| RCA23_c06810 | sarcosine oxidase beta subunit SoxB                                | COG0665 | E | GI 3 | 82.58  | 81.90  |
| RCA23_c06820 | sarcosine oxidase delta subunit SoxD                               | COG4311 | E | GI 3 | 0.00   | 100.00 |
| RCA23_c06830 | sarcosine oxidase alpha subunit SoxA                               | COG0404 | E | GI 3 | 41.21  | 75.69  |
| RCA23_c06840 | sarcosine oxidase gamma subunit SoxG                               | COG4583 | E | GI 3 | 100.00 | 77.66  |
| RCA23_c06850 | hypothetical protein, DUF6 transmembrane protein                   | COG0697 | G | GI 3 | 100.00 | 78.68  |
| RCA23_c06860 | putative phage integrase                                           |         |   | GI 3 | 46.25  | 27.23  |
| RCA23_c06870 | putative amidase                                                   | COG0154 | J | GI 3 | 0.00   | 0.00   |
| RCA23_c06880 | integrase                                                          | COG4974 | L | GI 3 | 100.00 | 55.20  |
| RCA23_c06890 | putative helicase                                                  |         |   | GI 3 | 48.29  | 0.00   |
| RCA23_c06900 | transposase                                                        | COG3316 | L | GI 3 | 0.00   | 99.00  |
| RCA23_c06910 | HTH-type transcriptional regulator, LuxR family                    | COG2197 | T | GI 3 | 0.00   | 100.00 |
| RCA23_c06920 | putative oxidoreductase, molybdopterin binding                     | COG3915 | S | GI 3 | 0.00   | 100.00 |
| RCA23_c06930 | signal transduction histidine kinase                               | COG0642 | T | GI 3 | 0.00   | 73.12  |
| RCA23_c06940 | glucose-1-phosphate thymidyltransferase RfbA                       | COG1209 | M | GI 3 | 0.00   | 61.33  |
| RCA23_c06950 | hypothetical protein, chain length determinant protein             | COG0489 | D | GI 3 | 0.00   | 69.96  |
| RCA23_c06960 | polysaccharide export protein                                      | COG1596 | M | GI 3 | 0.00   | 79.68  |

|              |                                                                           |         |   |      |      |        |
|--------------|---------------------------------------------------------------------------|---------|---|------|------|--------|
| RCA23_c06970 | hypothetical protein, VanZ-like                                           | COG5652 | S | GI 3 | 0.00 | 100.00 |
| RCA23_c06980 | type I secretion system membrane fusion protein, HlyD family              | COG1566 | V | GI 3 | 0.00 | 22.42  |
| RCA23_c06990 | type I secretion system ATP-binding component, HlyB family                | COG2274 | V | GI 3 | 0.00 | 67.28  |
| RCA23_c07000 | type I secretion outer membrane protein, TolC family                      | COG1538 | M | GI 3 | 0.00 | 52.58  |
| RCA23_c07010 | putative serralysin-like metalloprotease                                  | COG2931 | Q | GI 3 | 0.00 | 26.87  |
| RCA23_c07020 | dTDP-4-dehydrorhamnose reductase RfbD                                     | COG1091 | M | GI 3 | 0.00 | 79.65  |
| RCA23_c07030 | dTDP-glucose 4,6-dehydratase RfbB                                         | COG1088 | M | GI 3 | 0.00 | 23.63  |
| RCA23_c07040 | dTDP-4-dehydrorhamnose 3,5-epimerase RfbC                                 | COG1898 | M | GI 3 | 0.00 | 88.30  |
| RCA23_c07050 | hypothetical protein                                                      |         |   | GI 3 | 0.00 | 80.02  |
| RCA23_c07060 | glycosyltransferase                                                       | COG0438 | M | GI 3 | 0.00 | 21.48  |
| RCA23_c07070 | putative glycosyltransferase                                              | COG0438 | M | GI 3 | 0.00 | 46.21  |
| RCA23_c07080 | hypothetical protein, UDP-glycosyltransferase/glycogen phosphorylase-like | COG0438 | M | GI 3 | 0.00 | 23.52  |
| RCA23_c07090 | polysaccharide biosynthesis protein                                       |         |   | GI 3 | 0.00 | 31.69  |
| RCA23_c07100 | UDP-4-amino-4-deoxy-L-arabinose--oxoglutarate aminotransferase ArnB       | COG0399 | M | GI 3 | 0.00 | 0.00   |
| RCA23_c07110 | hypothetical, WxcM-like                                                   | COG0110 | R | GI 3 | 0.00 | 53.54  |
| RCA23_c07120 | hypothetical protein, WxcM-like                                           |         |   | GI 3 | 0.00 | 0.00   |
| RCA23_c07130 | hypothetical protein, acyltransferase-like                                | COG1670 | J | GI 3 | 0.00 | 0.00   |
| RCA23_c07140 | UDP-glucose/GDP-mannose dehydrogenase family protein                      | COG0677 | M | GI 3 | 0.00 | 68.17  |
| RCA23_c07150 | S-adenosyl-L-methionine-dependent methyltransferase                       |         |   | GI 3 | 0.00 | 25.41  |
| RCA23_c07160 | UDP-glucuronate 5'-epimerase Lspl                                         | COG0451 | M | GI 3 | 0.00 | 53.53  |
| RCA23_c07170 | transcriptional regulator, MarR family                                    | COG1846 | K | GI 3 | 0.00 | 62.43  |
| RCA23_c07180 | transcription antitermination protein NusG                                | COG0250 | K | GI 3 | 0.00 | 87.33  |
| RCA23_c07190 | hypothetical protein                                                      | COG1434 | S | GI 3 | 0.00 | 81.82  |
| RCA23_c07200 | lipopolysaccharide core biosynthesis mannosyltransferase LpcC             | COG0438 | M | GI 3 | 0.00 | 69.74  |
| RCA23_c07210 | hypothetical protein                                                      |         |   | GI 3 | 0.00 | 100.00 |
| RCA23_c07220 | undecaprenyl-phosphate alpha-N-acetylglucosaminyl 1-phosphate transferase | COG0472 | M | GI 3 | 0.00 | 80.44  |
| RCA23_c07230 | hypothetical protein, transmembrane                                       |         |   | GI 3 | 0.00 | 84.12  |
| RCA23_c07240 | hypothetical protein, transmembrane                                       |         |   | GI 3 | 0.00 | 68.70  |
| RCA23_c07250 | transposase, IS4 family protein                                           |         |   | GI 3 | 0.00 | 100.00 |
| RCA23_c07260 | putative transposase                                                      | COG3039 | L | GI 3 | 0.00 | 56.86  |
| RCA23_c07270 | hypothetical protein, transmembrane                                       |         |   | GI 3 | 0.00 | 74.94  |
| RCA23_c07280 | hypothetical protein, transmembrane                                       |         |   | GI 3 | 0.00 | 49.34  |
| RCA23_c07290 | transposase                                                               | COG3316 | L | GI 3 | 0.00 | 0.00   |



|              |                                                                               |         |   |      |        |        |
|--------------|-------------------------------------------------------------------------------|---------|---|------|--------|--------|
| RCA23_c07300 | glycogen synthase GlgA                                                        | COG0297 | G | GI 3 | 0.00   | 49.69  |
| RCA23_c07310 | glycogen debranching enzyme GlgX                                              | COG1523 | G | GI 3 | 0.00   | 35.65  |
| RCA23_c07320 | phosphoglucomutase Pgm                                                        | COG0033 | G | GI 3 | 0.00   | 32.35  |
| RCA23_c07330 | putative alpha-glucosidase AgIA                                               | COG0366 | G | GI 3 | 0.00   | 45.27  |
| RCA23_c07340 | transposase                                                                   | COG3316 | L | GI 3 | 0.00   | 100.00 |
| RCA23_c07350 | uncharacterized hydrolase YtnL                                                | COG1473 | R | GI 3 | 100.00 | 62.38  |
| RCA23_c07360 | glutathione-binding protein GsiB                                              | COG0747 | E | GI 3 | 89.85  | 100.00 |
| RCA23_c07370 | glutathione transport system permease protein GsiC                            | COG0601 | E | GI 3 | 100.00 | 94.20  |
| RCA23_c07380 | dipeptide transport system permease protein                                   | COG1173 | E | GI 3 | 100.00 | 100.00 |
| RCA23_c07390 | glutathione import ATP-binding protein GsiA                                   | COG4172 | R | GI 3 | 100.00 | 97.59  |
| RCA23_c07400 | peptidase family S58                                                          | COG3191 | E | GI 3 | 100.00 | 100.00 |
| RCA23_c07410 | aldehyde dehydrogenase AldA                                                   | COG1012 | C | GI 3 | 100.00 | 100.00 |
| RCA23_c07420 | 3-oxoacyl-[acyl-carrier-protein] reductase FabG                               | COG1028 | I | GI 3 | 100.00 | 97.71  |
| RCA23_c07430 | amidase                                                                       | COG0154 | J | GI 3 | 100.00 | 98.01  |
| RCA23_c07440 | MFS-type transporter                                                          | COG2807 | P | GI 3 | 100.00 | 82.51  |
| RCA23_c07450 | peptidase M20D amidohydrolase                                                 | COG1473 | R | GI 3 | 0.00   | 0.00   |
| RCA23_c07460 | transposase                                                                   | COG3316 | L | GI 3 | 0.00   | 0.00   |
| RCA23_c07470 | integrase                                                                     | COG2801 | L | GI 3 | 0.00   | 0.00   |
| RCA23_c07480 | transposase                                                                   |         |   | GI 3 | 0.00   | 0.00   |
| RCA23_c07490 | hypothetical protein, DUF3764                                                 |         |   | GI 3 | 67.84  | 28.63  |
| RCA23_c07500 | hypothetical protein                                                          |         |   | GI 3 | 100.00 | 0.00   |
| RCA23_c07510 | hypothetical protein, beta-lactam-insensitive peptidoglycan transpeptidase Yk | COG1376 | S | GI 3 | 100.00 | 56.43  |
| RCA23_c07520 | hypothetical protein                                                          |         |   | GI 3 | 100.00 | 100.00 |
| RCA23_c07530 | ABC transporter, ATP-binding protein, SbmA/BacA-like family                   | COG1133 | I | GI 3 | 100.00 | 62.26  |
| RCA23_c07540 | hypothetical protein                                                          |         |   | GI 3 | 100.00 | 50.36  |
| RCA23_c07550 | hypothetical protein                                                          |         |   | GI 3 | 0.00   | 0.00   |
| RCA23_c07560 | integrase                                                                     | COG2801 | L | GI 3 | 0.00   | 0.00   |
| RCA23_c07570 | hypothetical protein                                                          |         |   | GI 3 | 0.00   | 0.00   |
| RCA23_c07580 | hypothetical protein                                                          |         |   | GI 3 | 0.00   | 0.00   |
| RCA23_c07590 | flagellin FliC                                                                | COG1344 | N | GI 3 | 0.00   | 0.00   |
| RCA23_c07600 | RNA polymerase sigma-54                                                       | COG1508 | K | GI 3 | 84.01  | 49.32  |
| RCA23_c07610 | hypothetical protein, cyclic nucleotide-binding-like                          |         |   | GI 3 | 100.00 | 0.00   |
| RCA23_c07620 | hypothetical protein                                                          | COG0664 | T | GI 3 | 100.00 | 51.13  |

|              |                                                       |         |   |      |        |       |
|--------------|-------------------------------------------------------|---------|---|------|--------|-------|
| RCA23_c07630 | hypothetical protein                                  |         |   | GI 3 | 0.00   | 21.60 |
| RCA23_c07640 | hypothetical protein                                  |         |   | GI 3 | 0.00   | 33.83 |
| RCA23_c07650 | hypothetical protein                                  |         |   | GI 3 | 0.00   | 59.36 |
| RCA23_c07660 | flagellar biosynthesis protein FlhB                   | COG1377 | N | GI 3 | 69.34  | 29.88 |
| RCA23_c07670 | flagellar biosynthetic protein FliR                   | COG1684 | N | GI 3 | 100.00 | 67.52 |
| RCA23_c07680 | flagellar biosynthetic protein FliQ                   | COG1987 | N | GI 3 | 100.00 | 56.30 |
| RCA23_c07690 | flagellar biosynthetic protein FliP                   | COG1338 | N | GI 3 | 100.00 | 0.00  |
| RCA23_c07700 | flagellar motor switch protein FliN                   | COG1886 | N | GI 3 | 100.00 | 34.92 |
| RCA23_c07710 | flagellar motor switch proteins FliM                  | COG1868 | N | GI 3 | 100.00 | 42.20 |
| RCA23_c07720 | protein FliL                                          | COG1580 | N | GI 3 | 100.00 | 59.26 |
| RCA23_c07730 | putative flagellar hook-length control protein FliK   | COG3144 | N | GI 3 | 45.98  | 38.66 |
| RCA23_c07740 | putative flagellar export protein FliJ                |         |   | GI 3 | 0.00   | 45.00 |
| RCA23_c07750 | flagellar protein export ATPase FliI                  | COG1157 | N | GI 3 | 0.00   | 78.38 |
| RCA23_c07760 | putative flagellar assembly protein FliH              |         |   | GI 3 | 45.29  | 41.18 |
| RCA23_c07770 | flagellar motor switch protein G                      | COG1536 | N | GI 3 | 100.00 | 48.70 |
| RCA23_c07780 | flagellar M-ring protein FliF                         | COG1766 | N | GI 3 | 26.08  | 71.29 |
| RCA23_c07790 | flagellar hook-basal body complex subunit FliE        | COG1677 | N | GI 3 | 0.00   | 59.68 |
| RCA23_c07800 | transcriptional regulatory protein FliD               | COG2204 | T | GI 3 | 40.95  | 29.18 |
| RCA23_c07810 | protein FliL                                          | COG1580 | N | GI 3 | 100.00 | 66.48 |
| RCA23_c07820 | hypothetical protein                                  |         |   | GI 3 | 100.00 | 71.26 |
| RCA23_c07830 | flagellar protein FliS                                | COG1516 | N | GI 3 | 36.83  | 43.01 |
| RCA23_c07840 | hypothetical protein                                  |         |   | GI 3 | 33.33  | 0.00  |
| RCA23_c07850 | hypothetical protein                                  |         |   | GI 3 | 100.00 | 0.00  |
| RCA23_c07860 | flagellar basal-body rod protein FlgG                 | COG4786 | N | GI 3 | 100.00 | 14.18 |
| RCA23_c07870 | Cl <sup>-</sup> channel, voltage-gated family protein | COG0038 | P | GI 3 | 89.79  | 12.80 |
| RCA23_c07880 | hypothetical protein, lysozym-like                    | COG0741 | M | GI 3 | 100.00 | 17.44 |
| RCA23_c07890 | flagellar hook-associated protein FlgL                | COG1344 | N | GI 3 | 96.70  | 40.02 |
| RCA23_c07900 | flagellar hook-associated protein FlgK                | COG1256 | N | GI 3 | 95.40  | 20.46 |
| RCA23_c07910 | flagellar rod assembly protein/muramidase FlgJ        | COG3951 | M | GI 3 | 100.00 | 71.51 |
| RCA23_c07920 | flagellar P-ring protein FlgI                         | COG1706 | N | GI 3 | 100.00 | 54.35 |
| RCA23_c07930 | flagellar L-ring protein FlgH                         | COG2063 | N | GI 3 | 100.00 | 45.74 |
| RCA23_c07940 | flagellar basal-body rod protein FlgG                 | COG4786 | N | GI 3 | 45.75  | 38.28 |
| RCA23_c07950 | putative flagellar basal body rod protein FlgF        | COG4786 | N | GI 3 | 0.00   | 40.41 |



|              |                                                         |         |   |      |        |        |
|--------------|---------------------------------------------------------|---------|---|------|--------|--------|
| RCA23_c07960 | flagellar hook protein FlgE                             | COG1749 | N | GI 3 | 52.92  | 46.57  |
| RCA23_c07970 | flagellar basal body rod modification protein FlgD      | COG1843 | N | GI 3 | 100.00 | 71.27  |
| RCA23_c07980 | flagellar basal-body rod protein FlgC                   | COG1558 | N | GI 3 | 83.45  | 49.16  |
| RCA23_c07990 | flagellar basal-body rod protein FlgB                   | COG1815 | N | GI 3 | 0.00   | 63.31  |
| RCA23_c08000 | hypothetical protein                                    |         |   | GI 3 | 0.00   | 68.88  |
| RCA23_c08010 | hypothetical protein                                    |         |   | GI 3 | 0.00   | 68.35  |
| RCA23_c08020 | RNA polymerase, sigma factor for flagellar operon FliA  | COG1191 | K | GI 3 | 13.77  | 44.08  |
| RCA23_c08030 | putative flagellar biosynthesis protein FlhG            | COG0455 | D | GI 3 | 100.00 | 64.44  |
| RCA23_c08040 | flagellar biosynthesis protein FlhF                     | COG1419 | N | GI 3 | 91.12  | 25.89  |
| RCA23_c08050 | flagellar biosynthesis protein FlhA                     | COG1298 | N | GI 3 | 100.00 | 47.99  |
| RCA23_c08060 | hypothetical membrane lipoprotein, DUF400               |         |   | GI 3 | 46.46  | 9.26   |
| RCA23_c08070 | hypothetical protein                                    |         |   | GI 3 | 0.00   | 58.90  |
| RCA23_c08080 | flagellar basal body P-ring biosynthesis protein FlgA   | COG1261 | N | GI 3 | 95.68  | 41.84  |
| RCA23_c08090 | putative negative regulator of flagellin synthesis FlgM |         |   | GI 3 | 100.00 | 94.39  |
| RCA23_c08100 | hypothetical protein                                    |         |   | GI 3 | 100.00 | 40.89  |
| RCA23_c08110 | hypothetical protein, HCP-like                          | COG0790 | R | GI 3 | 100.00 | 60.82  |
| RCA23_c08120 | hypothetical protein                                    |         |   | GI 3 | 100.00 | 0.00   |
| RCA23_c08130 | sigma54 specific transcriptional regulator, Fis family  | COG2204 | T | GI 3 | 100.00 | 70.49  |
| RCA23_c08140 | flagellar hook-associated protein FliD                  | COG1345 | N | GI 3 | 15.63  | 57.75  |
| RCA23_c08150 | chemotaxis protein MotB                                 | COG1360 | N | GI 3 | 68.55  | 24.59  |
| RCA23_c08160 | chemotaxis protein MotA                                 | COG1291 | N | GI 3 | 42.13  | 35.70  |
| RCA23_c08170 | hypothetical protein, DUF1566                           |         |   | GI 3 | 7.69   | 25.85  |
| RCA23_c08180 | putative transmembrane protein, DUF6                    |         |   | GI 3 | 100.00 | 100.00 |
| RCA23_c08190 | putative polyketide hydroxylase SchC                    | COG0654 | H | GI 3 | 67.51  | 100.00 |
| RCA23_c08200 | aldehyde dehydrogenase                                  | COG1012 | C |      | 100.00 | 64.07  |
| RCA23_c08210 | 2-amino-3-carboxymuconate-6-semialdehyde decarboxylase  | COG2159 | R |      | 100.00 | 89.09  |
| RCA23_c08220 | transcriptional regulator, lclR family                  | COG1414 | K |      | 100.00 | 100.00 |
| RCA23_c08230 | TRAP transporter, 4TM/12TM fusion protein               | COG4666 | R |      | 100.00 | 92.04  |
| RCA23_c08240 | TRAP transporter solute receptor, TAXI family           | COG2358 | R |      | 100.00 | 81.43  |
| RCA23_c08250 | thiamine pyrophosphate enzyme-like TPP-binding          | COG0028 | E |      | 95.75  | 89.62  |
| RCA23_c08260 | hypothetical protein                                    | COG2268 | S |      | 100.00 | 67.72  |
| RCA23_c08270 | short chain dehydrogenase                               | COG1028 | I |      | 100.00 | 62.23  |
| RCA23_c08280 | putative aldehyde dehydrogenase yfmT                    | COG1012 | C |      | 4.67   | 92.95  |

|              |                                                                      |         |   |        |        |
|--------------|----------------------------------------------------------------------|---------|---|--------|--------|
| RCA23_c08290 | branched-chain amino acid ABC transporter, ATP-binding protein       | COG0410 | E | 0.00   | 100.00 |
| RCA23_c08300 | branched-chain amino acid ABC transporter, ATP-binding protein       | COG0411 | E | 0.00   | 80.97  |
| RCA23_c08310 | putative transporter, permease protein                               | COG4177 | E | 28.51  | 89.92  |
| RCA23_c08320 | putative transporter, permease protein                               | COG0559 | E | 100.00 | 80.18  |
| RCA23_c08330 | putative transporter, periplasmic binding protein                    | COG0683 | E | 0.00   | 75.58  |
| RCA23_c08340 | hypothetical protein, PrpF protein-like                              | COG2828 | S | 63.44  | 99.81  |
| RCA23_c08350 | 4-carboxy-4-hydroxy-2-oxoadipate aldolase/oxaloacetate decarboxylase | COG0684 | H | 67.87  | 63.96  |
| RCA23_c08360 | putative N-acetylglucosaminyl-phosphatidylinositol de-N-acetylase,   | COG2120 | S | 26.67  | 73.47  |
| RCA23_c08370 | hypothetical protein                                                 |         |   | 44.71  | 100.00 |
| RCA23_c08380 | transcriptional regulator                                            | COG1802 | K | 0.00   | 100.00 |
| RCA23_c08390 | aminomethyltransferase GcvT                                          | COG0404 | E | 92.15  | 95.36  |
| RCA23_c08400 | TRAP dicarboxylate transporter, subunit DctP                         | COG1638 | G | 100.00 | 85.38  |
| RCA23_c08410 | TRAP dicarboxylate transporter, subunit DctQ                         | COG3090 | G | 100.00 | 59.65  |
| RCA23_c08420 | TRAP dicarboxylate transporter, subunit DctM                         | COG1593 | G | 71.26  | 100.00 |
| RCA23_c08430 | metapyrocatechase Xyle                                               | COG2514 | R | 78.34  | 86.31  |
| RCA23_c08440 | MFS-type transporter                                                 | COG2814 | G | 100.00 | 87.79  |
| RCA23_c08450 | hypothetical protein, cytochrome c                                   |         |   | 100.00 | 100.00 |
| RCA23_c08460 | hypothetical protein, copper resistance protein C                    | COG2372 | R | 100.00 | 100.00 |
| RCA23_c08470 | hypothetical protein, copper resistance protein D                    | COG1276 | P | 24.18  | 100.00 |
| RCA23_c08480 | hypothetical protein                                                 | COG3613 | F | 100.00 | 100.00 |
| RCA23_c08490 | hypothetical protein                                                 |         |   | 100.00 | 100.00 |
| RCA23_c08500 | hypothetical protein                                                 |         |   | 100.00 | 100.00 |
| RCA23_c08510 | fumarate reductase flavoprotein subunit                              | COG1053 | C | 100.00 | 100.00 |
| RCA23_c08520 | methylisocitrate lyase PrpB                                          | COG2513 | G | 100.00 | 99.54  |
| RCA23_c08530 | putative isochorismatase family protein                              | COG1335 | Q | 100.00 | 93.56  |
| RCA23_c08540 | hydantoin utilization protein A                                      | COG0145 | E | 84.74  | 100.00 |
| RCA23_c08550 | hydantoin utilization protein B                                      | COG0146 | E | 79.94  | 99.76  |
| RCA23_c08560 | hypothetical protein                                                 | COG1942 | R | 100.00 | 100.00 |
| RCA23_c08570 | HTH-type transcriptional regulator, GntR family                      | COG2188 | K | 100.00 | 91.76  |
| RCA23_c08580 | 3-isopropylmalate dehydratase large subunit LeuC                     | COG0065 | E | 100.00 | 100.00 |
| RCA23_c08590 | 3-isopropylmalate dehydratase small subunit LeuD                     | COG0066 | E | 100.00 | 100.00 |
| RCA23_c08600 | TRAP dicarboxylate transporter, subunit DctP                         | COG1638 | G | 100.00 | 100.00 |
| RCA23_c08610 | TRAP transporter, subunit DctQ                                       | COG3090 | G | 100.00 | 100.00 |

|              |                                                           |         |   |        |        |
|--------------|-----------------------------------------------------------|---------|---|--------|--------|
| RCA23_c08620 | TRAP dicarboxylate transporter, subunit DctM              | COG1593 | G | 100.00 | 100.00 |
| RCA23_c08630 | putative glutamate synthase [NADPH] small chain           | COG0493 | E | 100.00 | 100.00 |
| RCA23_c08640 | hypothetical protein, dihydroorotate dehydrogenase        | COG0167 | F | 100.00 | 98.93  |
| RCA23_c08650 | putative HTH-type transcriptional regulator               | COG1309 | K | 100.00 | 100.00 |
| RCA23_c08660 | N-carbamoyl-L-amino acid hydrolase AmaB                   | COG0624 | E | 100.00 | 100.00 |
| RCA23_c08670 | D-hydantoinase/dihydropyrimidinase Dht                    | COG0044 | F | 100.00 | 99.59  |
| RCA23_c08680 | ABC transporter ATP-binding protein                       | COG1116 | P | 100.00 | 100.00 |
| RCA23_c08690 | putative ABC transporter permease protein                 | COG0600 | P | 100.00 | 100.00 |
| RCA23_c08700 | putative ABC transporter permease protein                 | COG0600 | P | 100.00 | 100.00 |
| RCA23_c08710 | putative thiamine biosynthesis protein                    | COG0715 | P | 100.00 | 100.00 |
| RCA23_c08720 | putative integral membrane proein DUF6                    | COG0697 | G | 100.00 | 100.00 |
| RCA23_c08730 | hypothetical protein DUF6                                 | COG0697 | G | 100.00 | 100.00 |
| RCA23_c08740 | alkaline phosphatase synthesis sensor protein PhoR        | COG5002 | T | 100.00 | 100.00 |
| RCA23_c08750 | putative phosphate binding protein PstS                   | COG0226 | P | 100.00 | 97.50  |
| RCA23_c08760 | putative phosphate transport system permease protein PstC | COG0573 | P | 93.28  | 100.00 |
| RCA23_c08770 | putative phosphate transport system permease protein PstA | COG0581 | P | 100.00 | 100.00 |
| RCA23_c08780 | phosphate import ATP-binding protein PstB                 | COG1117 | P | 100.00 | 100.00 |
| RCA23_c08790 | phosphate transport system regulatory protein PhoU        | COG0704 | P | 100.00 | 96.83  |
| RCA23_c08800 | phosphate regulon transl protein PhoB                     | COG0745 | T | 100.00 | 100.00 |
| RCA23_c08810 | putative hippurate hydrolase protei                       | COG1473 | R | 100.00 | 49.13  |
| RCA23_c08820 | urease accessory protein UreD                             | COG0829 | O | 100.00 | 100.00 |
| RCA23_c08830 | urease gamma subunit UreA                                 | COG0831 | E | 100.00 | 100.00 |
| RCA23_c08840 | urease beta subunit UreB                                  | COG0832 | E | 100.00 | 100.00 |
| RCA23_c08850 | urease alpha subunit UreC                                 | COG0804 | E | 100.00 | 98.62  |
| RCA23_c08860 | urease accessory protein UreE                             | COG2371 | O | 100.00 | 100.00 |
| RCA23_c08870 | urease accessory protein UreF                             | COG0830 | O | 2.83   | 100.00 |
| RCA23_c08880 | urease accessory protein UreG                             | COG0378 | O | 0.00   | 100.00 |
| RCA23_c08890 | integrase                                                 | COG2801 | L | 0.00   | 0.00   |
| RCA23_c08900 | hypothetical protein                                      | COG4585 | T | 53.33  | 100.00 |
| RCA23_c08910 | glucose-methanol-choline oxidoreductase AlkJ              | COG2303 | E | 92.11  | 100.00 |
| RCA23_c08920 | hypothetical protein, YaeQ family protein                 | COG4681 | S | 100.00 | 100.00 |
| RCA23_c08930 | hypothetical protein, DUF6 transmembrane protein          | COG0697 | G | 100.00 | 100.00 |
| RCA23_c08940 | UDP-glucose 6-dehydrogenase Ugd                           | COG1004 | M | 100.00 | 100.00 |

|              |                                                   |         |   |      |        |        |
|--------------|---------------------------------------------------|---------|---|------|--------|--------|
| RCA23_c08950 | 3-deoxy-D-manno-octulosonic-acid transferase WaaA | COG1519 | M |      | 100.00 | 100.00 |
| RCA23_c08960 | UDP-N-acetylglucosamine 2-epimerase WecB          | COG0381 | M |      | 100.00 | 100.00 |
| RCA23_c08970 | putative N-acetylneuramic acid synthase           | COG2089 | M |      | 42.44  | 100.00 |
| RCA23_c08980 | hypothetical protein                              |         |   |      | 67.65  | 100.00 |
| RCA23_c08990 | hypothetical protein                              | COG1651 | O |      | 100.00 | 100.00 |
| RCA23_c09000 | choline-sulfatase BetC                            | COG3119 | P |      | 100.00 | 94.68  |
| RCA23_c09010 | permease                                          | COG2233 | F |      | 100.00 | 100.00 |
| RCA23_c09020 | hypothetical protein                              |         |   |      | 100.00 | 100.00 |
| RCA23_c09030 | membrane dipeptidase                              | COG2355 | E |      | 100.00 | 100.00 |
| RCA23_c09040 | hypothetical protein                              |         |   |      | 100.00 | 100.00 |
| RCA23_c09050 | hypothetical protein                              |         |   |      | 100.00 | 100.00 |
| RCA23_c09060 | tRNA pseudouridine synthase A                     | COG0101 | J |      | 100.00 | 96.38  |
| RCA23_c09070 | YcjX-like protein                                 | COG3106 | R |      | 100.00 | 93.14  |
| RCA23_c09080 | hypothetical protein, acetyltransferase-like      | COG0456 | R |      | 100.00 | 100.00 |
| RCA23_c09090 | hypothetical protein                              | COG3768 | S |      | 100.00 | 92.33  |
| RCA23_c09100 | isoleucyl-tRNA synthase IleS                      | COG0060 | J |      | 100.00 | 100.00 |
| RCA23_c09110 | putative integral membrane protein DUF6           |         |   |      | 100.00 | 100.00 |
| RCA23_c09120 | phosphatidylcholine synthase Pcs                  | COG1183 | I |      | 100.00 | 100.00 |
| RCA23_c09130 | putative tyrosine recombinase xerC                | COG4974 | L |      | 100.00 | 100.00 |
| RCA23_c09140 | hypothetical protein                              | COG3159 | S |      | 100.00 | 100.00 |
| RCA23_c09150 | transaldolase                                     | COG0176 | G |      | 100.00 | 100.00 |
| RCA23_c09160 | primosomal protein N'                             | COG1198 | L |      | 100.00 | 100.00 |
| RCA23_c09170 | methylmalonyl-CoA mutase McmA                     | COG1884 | I |      | 100.00 | 93.52  |
| RCA23_c09180 | glycerol-3-phosphate acyltransferase PlsB         | COG2937 | I |      | 100.00 | 98.68  |
| RCA23_c09190 | crotonyl-CoA reductase Ccr                        | COG0604 | C |      | 100.00 | 100.00 |
| RCA23_c09200 | putative ATPase                                   | COG0507 | L |      | 100.00 | 98.61  |
| RCA23_c09210 | trimethylamine methyltransferase MttB             | COG5598 | H |      | 100.00 | 100.00 |
| RCA23_c09220 | hypothetical protein DUF1052                      | COG5321 | S |      | 100.00 | 100.00 |
| RCA23_c09240 | hypothetical protein, DUF411                      | COG3019 | R | GI 4 | 0.00   | 0.00   |
| RCA23_c09250 | hypothetical protein                              |         |   | GI 4 | 0.00   | 0.00   |
| RCA23_c09260 | hypothetical protein                              |         |   | GI 4 | 0.00   | 0.00   |
| RCA23_c09270 | hypothetical protein                              | COG4642 | S | GI 4 | 0.00   | 0.00   |
| RCA23_c09280 | hypothetical protein                              | COG3904 | S | GI 4 | 0.00   | 0.00   |

|              |                                                              |         |   |      |        |        |
|--------------|--------------------------------------------------------------|---------|---|------|--------|--------|
| RCA23_c09290 | putative DNA-binding protein, transposase-like               | COG3415 | L | GI 4 | 0.00   | 0.00   |
| RCA23_c09300 | HTH-type transcriptional regulator, LysR family              | COG0583 | K | GI 4 | 0.00   | 0.00   |
| RCA23_c09310 | hypothetical protein                                         |         |   | GI 4 | 0.00   | 0.00   |
| RCA23_c09320 | hypothetical protein, hydrolase-like                         | COG0627 | R | GI 4 | 0.00   | 0.00   |
| RCA23_c09330 | putative integrase                                           | COG2801 | L | GI 4 | 0.00   | 44.52  |
| RCA23_c09340 | putative transposase                                         |         |   | GI 4 | 0.00   | 100.00 |
| RCA23_c09350 | hypothetical protein, ornithine cyclodeaminase-like          | COG2423 | E |      | 0.00   | 0.00   |
| RCA23_c09360 | LrgB-like protein                                            | COG1346 | M |      | 100.00 | 100.00 |
| RCA23_c09370 | hypothetical protein                                         | COG1380 | R |      | 100.00 | 100.00 |
| RCA23_c09380 | putative branched-chain-amino-acid aminotransferase IlvE     | COG0115 | E |      | 100.00 | 100.00 |
| RCA23_c09390 | 2-hydroxy-3-oxopropionate reductase GarR                     | COG2084 | I |      | 100.00 | 100.00 |
| RCA23_c09400 | bicyclomycin resistance protein Bcr                          | COG2814 | G |      | 100.00 | 100.00 |
| RCA23_c09410 | hypothetical protein                                         |         |   |      | 100.00 | 71.10  |
| RCA23_c09420 | hypothetical protein, photolyase                             | COG3046 | R |      | 100.00 | 97.08  |
| RCA23_c09430 | DNA photolyase, FAD-binding/cryptochrome                     | COG0415 | L |      | 100.00 | 91.30  |
| RCA23_c09440 | carbon monoxide dehydrogenase small chain CoxS               | COG2080 | C |      | 100.00 | 100.00 |
| RCA23_c09450 | carbon monoxide dehydrogenase large chain CoxL               | COG1529 | C |      | 100.00 | 100.00 |
| RCA23_c09460 | carbon monoxide dehydrogenase medium chain CoxM              | COG1319 | C |      | 100.00 | 100.00 |
| RCA23_c09470 | MoxR-like ATPase                                             | COG0714 | R |      | 100.00 | 100.00 |
| RCA23_c09480 | CoxE-like protein                                            | COG3552 | R |      | 100.00 | 89.68  |
| RCA23_c09490 | 5-deoxy-glucuronate isomerase lolB                           | COG3718 | G |      | 100.00 | 100.00 |
| RCA23_c09500 | branched-chain amino acid transport protein, AzlD-like       | COG4392 | S |      | 100.00 | 100.00 |
| RCA23_c09510 | branched-chain amino acid transport protein, AzlC-like       | COG1296 | E |      | 100.00 | 100.00 |
| RCA23_c09520 | alpha-IPM synthase/homocitrate synthase                      | COG0119 | E |      | 100.00 | 95.84  |
| RCA23_c09530 | cytochrome P450                                              | COG2124 | Q |      | 93.18  | 94.13  |
| RCA23_c09540 | TRAP dicarboxylate transporter, subunit DctP                 | COG1638 | G |      | 100.00 | 100.00 |
| RCA23_c09550 | TRAP dicarboxylate transporter, subunit DctQ                 | COG3090 | G |      | 100.00 | 100.00 |
| RCA23_c09560 | TRAP dicarboxylate transporter, subunit DctM                 | COG1593 | G |      | 100.00 | 99.40  |
| RCA23_c09570 | putative citrate transporter                                 | COG0471 | P |      | 100.00 | 100.00 |
| RCA23_c09580 | triosephosphate isomerase TpiA                               | COG0149 | G |      | 100.00 | 100.00 |
| RCA23_c09590 | putative regulator protein of competence-specific genes TfoX | COG3070 | K |      | 100.00 | 98.11  |
| RCA23_c09600 | hypothetical protein, iron-sulfur cluster assembly protein   | COG0316 | S |      | 100.00 | 100.00 |
| RCA23_c09610 | hypothetical protein DUF59                                   | COG2151 | R |      | 100.00 | 100.00 |

|              |                                                        |         |   |        |        |
|--------------|--------------------------------------------------------|---------|---|--------|--------|
| RCA23_c09620 | queuine tRNA-ribosyltransferase Tgt                    | COG0343 | J | 100.00 | 100.00 |
| RCA23_c09630 | hypothetical protein                                   |         |   | 100.00 | 100.00 |
| RCA23_c09640 | ATP-dependent protease La                              | COG0466 | O | 100.00 | 99.83  |
| RCA23_c09650 | putative phosphoglycerate mutase family protein        | COG0406 | G | 100.00 | 100.00 |
| RCA23_c09670 | protein-L-isoaspartate O-methyltransferase Pcm         | COG2518 | O | 100.00 | 100.00 |
| RCA23_c09680 | outer membrane efflux protein                          | COG1538 | M | 100.00 | 100.00 |
| RCA23_c09690 | hypothetical protein                                   |         |   | 100.00 | 100.00 |
| RCA23_c09700 | cobyric acid synthase CobQ                             | COG1492 | H | 100.00 | 100.00 |
| RCA23_c09710 | hypothetical protein                                   |         |   | 100.00 | 100.00 |
| RCA23_c09720 | translation elongation factor P                        | COG0231 | J | 100.00 | 100.00 |
| RCA23_c09730 | hypothetical protein tRNA modifying protein YgfZ       | COG0354 | R | 100.00 | 100.00 |
| RCA23_c09740 | putative glycosyltransferase, family 2                 | COG0463 | M | 100.00 | 100.00 |
| RCA23_c09750 | lipid A export ATP-binding/permease protein MsbA       | COG1132 | V | 100.00 | 100.00 |
| RCA23_c09760 | serine--glyoxylate aminotransferase SgaA               | COG0075 | E | 100.00 | 93.37  |
| RCA23_c09770 | histidinol-phosphate aminotransferase HisC             | COG0079 | E | 100.00 | 100.00 |
| RCA23_c09780 | valyl-tRNA synthase ValS                               | COG0525 | J | 100.00 | 98.26  |
| RCA23_c09790 | hypothetical protein, metal-dependent phosphohydrolase | COG4341 | R | 100.00 | 100.00 |
| RCA23_c09800 | putative phytanoyl-CoA dioxygenase family protein      | COG5285 | Q | 100.00 | 96.68  |
| RCA23_c09810 | molybdenum-containing hydroxylase                      | COG1529 | C | 100.00 | 99.43  |
| RCA23_c09820 | hypothetical protein DUF2235                           | COG3673 | S | 100.00 | 100.00 |
| RCA23_c09830 | 5,10-methylenetetrahydrofolate reductase MetF          | COG0685 | E | 100.00 | 100.00 |
| RCA23_c09840 | HTH-type transcriptional regulator MetR                | COG0583 | K | 100.00 | 100.00 |
| RCA23_c09850 | inositol-1-monophosphatase SuhB                        | COG0483 | G | 100.00 | 100.00 |
| RCA23_c09860 | hypothetical protein                                   | COG3063 | N | 100.00 | 100.00 |
| RCA23_c09880 | transcriptional regulator, HxlR family                 | COG1733 | K | 100.00 | 100.00 |
| RCA23_c09890 | hypothetical protein, DUF3764                          |         |   | 100.00 | 100.00 |
| RCA23_c09900 | hypothetical protein                                   |         |   | 100.00 | 100.00 |
| RCA23_c09910 | hypothetical protein, DsrE/F-like                      | COG1553 | P | 100.00 | 100.00 |
| RCA23_c09920 | glutathione peroxidase Gpo                             | COG0386 | O | 100.00 | 100.00 |
| RCA23_c09930 | putative ion channel                                   |         |   | 100.00 | 100.00 |
| RCA23_c09950 | hypothetical protein                                   |         |   | 34.50  | 100.00 |
| RCA23_c09940 | ribosomal large subunit pseudouridine synthase D       | COG0564 | J | 100.00 | 91.09  |
| RCA23_c09960 | RNA polymerase sigma-32 factor RpoH                    | COG0568 | K | 100.00 | 100.00 |

|              |                                                                             |         |   |        |        |
|--------------|-----------------------------------------------------------------------------|---------|---|--------|--------|
| RCA23_c09970 | putative oxidoreductase                                                     | COG0673 | R | 100.00 | 100.00 |
| RCA23_c09980 | oligoendopeptidase F                                                        | COG1164 | E | 100.00 | 97.87  |
| RCA23_c09990 | 2-keto-3-deoxy-L-rhamnonate aldolase RhmA                                   | COG3836 | G | 100.00 | 100.00 |
| RCA23_c10000 | hypothetical protein, lysophospholipase L2                                  | COG2267 | I | 100.00 | 100.00 |
| RCA23_c10010 | putative sterol-binding protein                                             | COG3255 | I | 100.00 | 100.00 |
| RCA23_c10020 | hypothetical protein                                                        |         |   | 100.00 | 86.99  |
| RCA23_c10030 | ATP-dependent RNA helicase RhlB                                             | COG4581 | L | 100.00 | 99.79  |
| RCA23_c10040 | putative heat shock protein                                                 | COG1188 | J | 100.00 | 100.00 |
| RCA23_c10050 | ferredoxin FdxA                                                             | COG1146 | C | 87.02  | 100.00 |
| RCA23_c10060 | putative transcriptional regulator, CarD family                             | COG1329 | K | 19.08  | 100.00 |
| RCA23_c10070 | cobalamin-5-phosphate synthase CobS                                         | COG0368 | H | 100.00 | 100.00 |
| RCA23_c10080 | nicotinate-nucleotide--dimethylbenzimidazole phosphoribosyltransferase Cob  | COG2038 | H | 100.00 | 100.00 |
| RCA23_c10090 | hypothetical protein                                                        |         |   | 100.00 | 99.41  |
| RCA23_c10100 | glyoxalase/bleomycin resistance protein                                     | COG3565 | R | 100.00 | 100.00 |
| RCA23_c10110 | hypothetical protein                                                        |         |   | 100.00 | 100.00 |
| RCA23_c10120 | choline dehydrogenase BetA                                                  | COG2303 | E | 100.00 | 100.00 |
| RCA23_c10140 | 23S rRNA (guanosine-2'-O-)-methyltransferase RlmB                           | COG0566 | J | 100.00 | 67.11  |
| RCA23_c10150 | phosphoribosyl-ATP pyrophosphatase HisE                                     | COG0140 | E | 100.00 | 100.00 |
| RCA23_c10160 | imidazole glycerol phosphate synthase subunit HisF                          | COG0107 | E | 100.00 | 100.00 |
| RCA23_c10170 | 1-(5-phosphoribosyl)-5-[(5-phosphoribosylamino)methylideneamino] imidazol   | COG0106 | E | 100.00 | 100.00 |
| RCA23_c10180 | imidazole glycerol phosphate synthase, glutamine amidotransferase subunit H | COG0118 | E | 100.00 | 87.64  |
| RCA23_c10190 | imidazoleglycerol-phosphate dehydratase HisB                                | COG0131 | E | 100.00 | 100.00 |
| RCA23_c10210 | hypothetical protein, calcineurin-like phosphoesterase-like                 | COG1409 | R | 100.00 | 100.00 |
| RCA23_c10220 | pyruvate carboxylase Pyc                                                    | COG1038 | C | 100.00 | 98.75  |
| RCA23_c10230 | L-lactate dehydrogenase lldD                                                | COG1304 | C | 100.00 | 100.00 |
| RCA23_c10240 | putative DNA helicase II                                                    | COG0210 | L | 100.00 | 100.00 |
| RCA23_c10250 | gamma-glutamylputrescine oxidoreductase PuuB                                | COG0665 | E | 100.00 | 100.00 |
| RCA23_c10260 | putative cysteine/O-acetylserine efflux protein                             | COG1280 | E | 100.00 | 100.00 |
| RCA23_c10270 | hypothetical protein                                                        |         |   | 100.00 | 100.00 |
| RCA23_c10280 | putative protein Mrp                                                        | COG0489 | D | 100.00 | 100.00 |
| RCA23_c10290 | hypothetical protein                                                        |         |   | 100.00 | 100.00 |
| RCA23_c10300 | hypothetical protein, MraZ                                                  | COG2001 | S | 100.00 | 100.00 |
| RCA23_c10310 | S-adenosyl-L-methionine-dependent methyltransferase MraW                    | COG0275 | M | 100.00 | 100.00 |



|              |                                                                          |         |   |        |        |
|--------------|--------------------------------------------------------------------------|---------|---|--------|--------|
| RCA23_c10320 | hypothetical protein                                                     | COG5462 | S | 100.00 | 100.00 |
| RCA23_c10330 | peptidoglycan synthase FtsI                                              | COG0768 | M | 100.00 | 98.32  |
| RCA23_c10340 | UDP-N-acetylmuramoyl-L-alanyl-D-glutamate--2,6-diaminopimelate ligase Mu | COG0769 | M | 100.00 | 100.00 |
| RCA23_c10350 | putative UDP-N-acetylmuramoyl-tripeptide--D-alanyl-D-alanine ligase MurF | COG0770 | M | 100.00 | 100.00 |
| RCA23_c10360 | phospho-N-acetylmuramoyl-pentapeptide-transferase MraY                   | COG0472 | M | 100.00 | 100.00 |
| RCA23_c10370 | UDP-N-acetylmuramoylalanine--D-glutamate ligase MurD                     | COG0771 | M | 100.00 | 100.00 |
| RCA23_c10380 | putative glycosyltransferase, sugar binding region                       | COG3774 | M | 100.00 | 100.00 |
| RCA23_c10390 | putative galactoside 2-alpha-L-fucosyltransferase 1                      |         |   | 100.00 | 100.00 |
| RCA23_c10400 | hypothetical protein                                                     |         |   | 100.00 | 100.00 |
| RCA23_c10410 | hypothetical protein                                                     | COG3306 | M | 100.00 | 100.00 |
| RCA23_c10420 | hypothetical protein HI0933                                              | COG2081 | R | 100.00 | 96.64  |
| RCA23_c10430 | cell division protein FtsW                                               | COG0772 | D | 100.00 | 100.00 |
| RCA23_c10440 | UDP-N-acetylglucosamine--N-acetylmuramyl-(pentapeptide) pyrophosphoryl-  | COG0707 | M | 100.00 | 100.00 |
| RCA23_c10450 | UDP-N-acetylmuramate--L-alanine ligase MurC                              | COG0773 | M | 100.00 | 100.00 |
| RCA23_c10460 | permease of the drug/metabolite transporter superfamily                  | COG0697 | G | 100.00 | 100.00 |
| RCA23_c10470 | UDP-N-acetylenolpyruvoylglucosamine reductase MurB                       | COG0812 | M | 100.00 | 85.96  |
| RCA23_c10480 | D-alanine--D-alanine ligase Ddl                                          | COG1181 | M | 100.00 | 100.00 |
| RCA23_c10490 | putative cell division protein FtsQ                                      |         |   | 57.96  | 100.00 |
| RCA23_c10500 | cell division protein FtsA                                               | COG0849 | D | 82.02  | 100.00 |
| RCA23_c10510 | cell division protein FtsZ                                               | COG0206 | D | 100.00 | 100.00 |
| RCA23_c10520 | UDP-3-O-[3-hydroxymyristoyl] N-acetylglucosamine deacetylase LpxC        | COG0774 | M | 100.00 | 100.00 |
| RCA23_c10530 | outer membrane assembly lipoprotein                                      | COG4105 | R | 100.00 | 100.00 |
| RCA23_c10540 | DNA repair protein RecN                                                  | COG0497 | L | 100.00 | 100.00 |
| RCA23_c10550 | hypothetical protein DUF427                                              | COG2343 | S | 100.00 | 100.00 |
| RCA23_c10560 | putative Xaa-Pro aminopeptidase                                          | COG0006 | E | 100.00 | 100.00 |
| RCA23_c10570 | aerobic cobaltochelatase subunit CobT                                    | COG4547 | H | 100.00 | 100.00 |
| RCA23_c10580 | aerobic cobaltochelatase subunit CobS                                    | COG0714 | R | 100.00 | 100.00 |
| RCA23_c10590 | hypothetical protein, DnaJ                                               | COG0484 | O | 100.00 | 100.00 |
| RCA23_c10600 | putative stress-induced morphoprotein, BOLA type                         | COG0271 | T | 54.17  | 100.00 |
| RCA23_c10610 | aspartyl/glutamyl-tRNA(Asn/Gln) amidotransferase subunit GatB            | COG0064 | J | 95.11  | 90.54  |
| RCA23_c10620 | aminopeptidase N                                                         | COG0308 | E | 95.06  | 95.89  |
| RCA23_c10630 | malate synthase GlcB                                                     | COG2225 | C | 100.00 | 97.29  |
| RCA23_c10640 | hypothetical protein DUF336                                              | COG3193 | R | 100.00 | 100.00 |



|              |                                                                       |         |   |      |        |        |
|--------------|-----------------------------------------------------------------------|---------|---|------|--------|--------|
| RCA23_c10650 | hypothetical protein                                                  |         |   |      | 100.00 | 100.00 |
| RCA23_c10660 | gamma-glutamyl-gamma-aminobutyrate hydrolase PuuD                     | COG2071 | R |      | 100.00 | 100.00 |
| RCA23_c10670 | putative D-beta-hydroxybutyrate dehydrogenase                         | COG1028 | I |      | 100.00 | 100.00 |
| RCA23_c10680 | NAD(P) transhydrogenase alpha subunit PntA                            | COG3288 | C |      | 100.00 | 100.00 |
| RCA23_c10690 | NAD(P) transhydrogenase beta subunit PntB                             | COG1282 | C |      | 100.00 | 100.00 |
| RCA23_c10700 | hypothetical protein                                                  | COG4949 | S |      | 100.00 | 100.00 |
| RCA23_c10710 | putative acetylornithine deacetylase ArgE                             | COG0624 | E |      | 100.00 | 100.00 |
| RCA23_c10720 | molybdenum cofactor biosynthesis protein MoaA                         | COG2896 | H |      | 100.00 | 98.21  |
| RCA23_c10730 | acetyl-coenzyme A synthase AcsA                                       | COG0365 | I |      | 100.00 | 94.60  |
| RCA23_c10740 | hypothetical protein                                                  | COG4321 | R |      | 100.00 | 100.00 |
| RCA23_c10750 | hypothetical protein                                                  |         |   |      | 100.00 | 100.00 |
| RCA23_c10760 | fumarate hydratase class II                                           | COG0114 | C |      | 100.00 | 100.00 |
| RCA23_c10770 | hypothetical protein                                                  | COG3814 | S |      | 100.00 | 81.29  |
| RCA23_c10780 | putative chromate transport protein                                   | COG2059 | P |      | 100.00 | 100.00 |
| RCA23_c10790 | hydantoinase / oxoprolinase family protein                            | COG0145 | E |      | 100.00 | 100.00 |
| RCA23_c10800 | hypothetical protein                                                  |         |   |      | 100.00 | 100.00 |
| RCA23_c10810 | putative quinone oxidoreductase yhdH                                  | COG0604 | C |      | 100.00 | 97.47  |
| RCA23_c10820 | cysteine desulfurase SufS                                             | COG0520 | E |      | 100.00 | 100.00 |
| RCA23_c10830 | deoxyribodipyrimidine photo-lyase PhrB                                | COG0415 | L |      | 89.88  | 88.75  |
| RCA23_c10840 | cyclopropane-fatty-acyl-phospholipid synthase Cfa                     | COG2230 | M |      | 45.00  | 100.00 |
| RCA23_c10850 | ADP-ribose pyrophosphatase NudF                                       | COG0494 | L |      | 100.00 | 99.46  |
| RCA23_c10860 | cysteine synthase CysK                                                | COG0031 | E |      | 100.00 | 93.55  |
| RCA23_c10870 | mechanosensitive ion channel protein MscS                             | COG3264 | M |      | 100.00 | 100.00 |
| RCA23_c10890 | putative phage integrase                                              | COG4974 | L | GI 5 | 34.02  | 25.54  |
| RCA23_c10900 | hypothetical protein                                                  |         |   | GI 5 | 0.00   | 19.20  |
| RCA23_c10910 | hypothetical protein, tetratricopeptide domain TPR-1                  | COG0457 | R | GI 5 | 0.00   | 0.00   |
| RCA23_c10920 | hypothetical protein, resolvase-like                                  | COG1961 | L | GI 5 | 100.00 | 100.00 |
| RCA23_c10930 | hypothetical protein, DUF2924                                         |         |   | GI 5 | 100.00 | 37.53  |
| RCA23_c10940 | putative TRAP transporter solute receptor                             | COG2358 | R | GI 5 | 35.69  | 62.17  |
| RCA23_c10950 | TRAP transporter, 4TM/12TM fusion protein                             | COG4666 | R | GI 5 | 100.00 | 57.74  |
| RCA23_c10960 | putative sulfatase YidJ                                               | COG3119 | P | GI 5 | 100.00 | 58.08  |
| RCA23_c10970 | arylsulfatase                                                         | COG1234 | R | GI 5 | 100.00 | 74.80  |
| RCA23_c10980 | siderophore interactin protein, vibriobactin utilization protein-like | COG2375 | P | GI 5 | 100.00 | 76.80  |

|              |                                                                                  |         |   |      |        |        |
|--------------|----------------------------------------------------------------------------------|---------|---|------|--------|--------|
| RCA23_c10990 | hypothetical protein, metallo-beta-lactamase                                     | COG2015 | Q | GI 5 | 97.10  | 63.07  |
| RCA23_c11000 | TRAP dicarboxylate transporter, subunit DctP                                     | COG1638 | G | GI 5 | 64.31  | 47.69  |
| RCA23_c11010 | glutathione S-transferase                                                        | COG0625 | O | GI 5 | 99.55  | 62.01  |
| RCA23_c11020 | TRAP dicarboxylate transporter, subunit DctQ                                     | COG3090 | G | GI 5 | 100.00 | 19.67  |
| RCA23_c11030 | TRAP dicarboxylate transporter, subunit DctM                                     | COG1593 | G | GI 5 | 100.00 | 20.78  |
| RCA23_c11040 | hypothetical protein, DUF6 transmembrane protein                                 | COG0697 | G | GI 5 | 100.00 | 34.32  |
| RCA23_c11050 | ferric reductase like transmembrane component family                             |         |   | GI 5 | 100.00 | 60.14  |
| RCA23_c11060 | hypothetical protein                                                             |         |   | GI 5 | 100.00 | 72.69  |
| RCA23_c11070 | hypothetical protein                                                             |         |   | GI 5 | 100.00 | 67.93  |
| RCA23_c11080 | sulfatase family protein                                                         | COG3119 | P | GI 5 | 12.09  | 49.51  |
| RCA23_c11090 | short-chain dehydrogenase/reductase SDR                                          | COG1028 | I | GI 5 | 3.29   | 35.31  |
| RCA23_c11100 | maleylacetoacetate isomerase MaiA                                                | COG0625 | O | GI 5 | 100.00 | 8.30   |
| RCA23_c11110 | salicylaldehyde dehydrogenase                                                    | COG1012 | C | GI 5 | 100.00 | 42.59  |
| RCA23_c11120 | transcriptional regulator, GntR family                                           | COG1802 | K | GI 5 | 100.00 | 47.91  |
| RCA23_c11130 | transposase                                                                      | COG3316 | L | GI 5 | 4.66   | 0.00   |
| RCA23_c11140 | putative phage integrase                                                         | COG4974 | L | GI 5 | 0.00   | 0.00   |
| RCA23_c11150 | hypothetical protein, alginate lyase-lyase                                       |         |   | GI 5 | 0.00   | 0.00   |
| RCA23_c11160 | HTH-type transcriptional regulator, GntR family                                  | COG1802 | K | GI 5 | 100.00 | 80.77  |
| RCA23_c11170 | branched-chain amino acid ABC transporter, periplasmic substrate-binding protein | COG0683 | E | GI 5 | 5.22   | 76.60  |
| RCA23_c11180 | branched-chain amino acid ABC transporter, permease protein                      | COG0559 | E | GI 5 | 91.81  | 90.14  |
| RCA23_c11190 | branched-chain amino acid ABC transporter, permease protein                      | COG4177 | E | GI 5 | 100.00 | 71.25  |
| RCA23_c11200 | branched-chain amino acid ABC transporter, ATP-binding protein                   | COG0411 | E | GI 5 | 77.12  | 44.58  |
| RCA23_c11210 | branched-chain amino acid ABC transporter, ATP-binding protein                   | COG0410 | E | GI 5 | 0.00   | 43.98  |
| RCA23_c11220 | hydantoin racemase HyuE                                                          | COG4126 | E | GI 5 | 0.00   | 62.57  |
| RCA23_c11230 | transposase                                                                      | COG3316 | L | GI 5 | 0.00   | 79.66  |
| RCA23_c11240 | glutamine transport ATP-binding protein GlnQ                                     | COG1126 | E | GI 5 | 0.00   | 0.00   |
| RCA23_c11250 | putative inner membrane amino-acid ABC transporter permease protein              | COG0765 | E | GI 5 | 0.00   | 0.00   |
| RCA23_c11260 | transposase                                                                      | COG3316 | L | GI 5 | 0.00   | 0.00   |
| RCA23_c11270 | transcriptional regulator CoxC                                                   | COG3300 | T | GI 5 | 43.53  | 100.00 |
| RCA23_c11280 | carbon monoxide dehydrogenase medium chain CoxM                                  | COG1319 | C | GI 5 | 100.00 | 100.00 |
| RCA23_c11290 | carbon monoxide dehydrogenase small chain CoxS                                   | COG2080 | C | GI 5 | 100.00 | 91.11  |
| RCA23_c11300 | carbon monoxide dehydrogenase large chain CoxL                                   | COG1529 | C | GI 5 | 89.29  | 98.06  |
| RCA23_c11310 | AAA+ ATPase chaperone CoxD                                                       | COG0714 | R | GI 5 | 95.43  | 92.47  |

|              |                                                                        |         |   |      |        |        |
|--------------|------------------------------------------------------------------------|---------|---|------|--------|--------|
| RCA23_c11320 | carbon monoxide dehydrogenase accessory protein CoxE                   | COG3552 | R | GI 5 | 100.00 | 100.00 |
| RCA23_c11330 | carbon monoxide dehydrogenase accessory protein CoxF                   | COG1975 | O | GI 5 | 100.00 | 91.92  |
| RCA23_c11340 | hypothetical protein                                                   | COG2068 | R | GI 5 | 100.00 | 100.00 |
| RCA23_c11350 | carbon monoxide dehydrogenase protein CoxG                             | COG3427 | S | GI 5 | 100.00 | 100.00 |
| RCA23_c11360 | carbon monoxide dehydrogenase accessory protein CoxI                   | COG1975 | O | GI 5 | 100.00 | 86.99  |
| RCA23_c11370 | transposase                                                            | COG3316 | L | GI 5 | 100.00 | 0.00   |
| RCA23_c11380 | dienelactone hydrolase                                                 | COG0412 | Q | GI 5 | 0.00   | 96.25  |
| RCA23_c11390 | aldo/keto reductase                                                    | COG0667 | C | GI 5 | 94.94  | 97.52  |
| RCA23_c11400 | mandelate racemase MdlA                                                | COG4948 | M | GI 5 | 100.00 | 91.07  |
| RCA23_c11410 | hypothetical protein DUF1498                                           | COG3822 | R | GI 5 | 100.00 | 100.00 |
| RCA23_c11420 | two-component system, sensor histidine kinase protein                  | COG0642 | T | GI 5 | 100.00 | 100.00 |
| RCA23_c11430 | two-component system, response regulator protein                       | COG0745 | T | GI 5 | 100.00 | 100.00 |
| RCA23_c11440 | hypothetical protein                                                   | COG3181 | S | GI 5 | 100.00 | 100.00 |
| RCA23_c11450 | putative tripartite tricarboxylate transporter (TTT) protein TctA      | COG3333 | S | GI 5 | 100.00 | 99.40  |
| RCA23_c11460 | hypothetical protein                                                   | COG2828 | S | GI 5 | 100.00 | 90.66  |
| RCA23_c11470 | D-isomer specific 2-hydroxyacid dehydrogenase                          | COG0111 | H | GI 5 | 100.00 | 94.32  |
| RCA23_c11480 | putative ammonia monooxygenase                                         | COG3180 | R | GI 5 | 100.00 | 100.00 |
| RCA23_c11490 | transcriptional regulator                                              | COG1802 | K | GI 5 | 100.00 | 100.00 |
| RCA23_c11500 | fumarate reductase flavoprotein subunit FccA                           | COG1053 | C | GI 5 | 100.00 | 100.00 |
| RCA23_c11510 | aspartate aminotransferase AspC                                        | COG0436 | E | GI 5 | 100.00 | 100.00 |
| RCA23_c11520 | hypothetical protein                                                   |         |   | GI 5 | 100.00 | 100.00 |
| RCA23_c11530 | aerobic glycerol-3-phosphate dehydrogenase GlpD                        | COG0578 | C | GI 5 | 100.00 | 98.78  |
| RCA23_c11540 | aerobic glycerol-3-phosphate dehydrogenase GlpD                        | COG0578 | C | GI 5 | 100.00 | 100.00 |
| RCA23_c11550 | hypothetical protein                                                   | COG1192 | D | GI 5 | 0.00   | 0.00   |
| RCA23_c11560 | chemotaxis protein CheW                                                | COG0835 | N | GI 5 | 64.10  | 0.00   |
| RCA23_c11570 | methyl-accepting chemotaxis protein II                                 | COG0840 | N | GI 5 | 99.09  | 0.00   |
| RCA23_c11580 | chemotaxis histidine kinase CheA                                       | COG0643 | N | GI 5 | 0.00   | 0.00   |
| RCA23_c11590 | response regulator CheY                                                | COG2114 | T | GI 5 | 0.00   | 0.00   |
| RCA23_c11600 | chemotaxis protein methyltransferase CheR                              | COG1352 | N | GI 5 | 0.00   | 0.00   |
| RCA23_c11610 | chemotaxis response regulator protein-glutamate methyltransferase CheB | COG2201 | N | GI 5 | 0.00   | 0.00   |
| RCA23_c11620 | metal-dependent hydrolase                                              | COG1235 | R | GI 5 | 0.00   | 0.00   |
| RCA23_c11630 | integrase                                                              | COG2801 | L | GI 5 | 0.00   | 0.00   |
| RCA23_c11640 | methyltransferase, FkbM family                                         |         |   | GI 5 | 0.00   | 0.00   |

|              |                                                                        |         |   |      |        |        |
|--------------|------------------------------------------------------------------------|---------|---|------|--------|--------|
| RCA23_c11650 | hypothetical protein, sugar transferase-like                           |         |   | GI 5 | 0.00   | 63.40  |
| RCA23_c11660 | aldo/keto reductase                                                    | COG0667 | C | GI 5 | 0.00   | 35.84  |
| RCA23_c11670 | hypothetical protein                                                   |         |   | GI 5 | 0.00   | 92.39  |
| RCA23_c11680 | hypothetical protein                                                   | COG0790 | R | GI 5 | 0.00   | 0.00   |
| RCA23_c11690 | hypothetical protein                                                   | COG4430 | S | GI 5 | 0.00   | 73.65  |
| RCA23_c11700 | hypothetical protein                                                   | COG2755 | E | GI 5 | 0.00   | 0.00   |
| RCA23_c11710 | phytanoyl-CoA dioxygenase family protein                               | COG5285 | Q | GI 5 | 100.00 | 100.00 |
| RCA23_c11720 | putative bacterial extracellular solute binding protein, family 3      | COG1791 | S | GI 5 | 0.00   | 92.32  |
| RCA23_c11730 | hypothetical protein                                                   |         |   | GI 5 | 0.00   | 6.62   |
| RCA23_c11740 | SOUL heme-binding protein                                              |         |   | GI 5 | 99.67  | 100.00 |
| RCA23_c11750 | arylsulfatase precursor                                                | COG3119 | P | GI 5 | 96.71  | 96.71  |
| RCA23_c11760 | hypothetical protein DUF583                                            |         |   | GI 5 | 0.00   | 0.00   |
| RCA23_c11770 | integrase                                                              | COG2801 | L | GI 5 | 0.00   | 0.00   |
| RCA23_c11780 | hypothetical protein                                                   | COG3616 | E | GI 5 | 79.40  | 94.19  |
| RCA23_c11790 | glutamine synthase GlnA type I                                         | COG0174 | E | GI 5 | 0.00   | 0.00   |
| RCA23_c11800 | putative HTH-type transcriptional regulator, RpiR family               | COG1737 | K | GI 5 | 0.00   | 0.00   |
| RCA23_c11810 | N-formylglutamate amidohydrolase                                       | COG3931 | E | GI 5 | 0.00   | 0.00   |
| RCA23_c11820 | putative isochorismatase family protein                                | COG1335 | Q | GI 5 | 0.00   | 0.00   |
| RCA23_c11830 | branched-chain amino acid ABC transporter, ATP-binding protein         | COG0411 | E | GI 5 | 70.26  | 0.00   |
| RCA23_c11840 | branched-chain amino acid ABC transporter, periplasmic binding protein | COG0683 | E | GI 5 | 100.00 | 0.00   |
| RCA23_c11850 | branched-chain amino acid ABC transporter, ATP-binding protein         | COG0410 | E | GI 5 | 0.00   | 0.00   |
| RCA23_c11860 | branched-chain amino acid ABC transporter, permease protein            | COG0559 | E | GI 5 | 0.00   | 0.00   |
| RCA23_c11870 | branched-chain amino acid ABC transporter, permease protein            | COG4177 | E | GI 5 | 0.00   | 3.49   |
| RCA23_c11880 | acetamidase/formamidase family protein                                 | COG2421 | C | GI 5 | 0.00   | 18.96  |
| RCA23_c11890 | hypothetical protein                                                   | COG1028 | I | GI 5 | 100.00 | 100.00 |
| RCA23_c11910 | putative prophage integrase                                            | COG0582 | L | GI 5 | 0.00   | 20.44  |
| RCA23_c11920 | hypothetical protein                                                   |         |   | GI 5 | 0.00   | 0.00   |
| RCA23_c11930 | hypothetical protein                                                   |         |   | GI 5 | 0.00   | 73.21  |
| RCA23_c11940 | putative AAA ATPase                                                    | COG3598 | L | GI 5 | 0.00   | 73.00  |
| RCA23_c11950 | hypothetical protein                                                   |         |   | GI 5 | 0.00   | 0.00   |
| RCA23_c11960 | hypothetical protein                                                   |         |   | GI 5 | 0.00   | 0.00   |
| RCA23_c11970 | hypothetical protein                                                   |         |   | GI 5 | 0.00   | 100.00 |
| RCA23_c11980 | hypothetical protein                                                   |         |   | GI 5 | 0.00   | 32.25  |

|              |                                                                          |         |   |      |        |       |
|--------------|--------------------------------------------------------------------------|---------|---|------|--------|-------|
| RCA23_c11990 | branched-chain amino acid ABC transporter, ATP-binding protein           | COG0410 | E | GI 5 | 100.00 | 75.68 |
| RCA23_c12000 | branched-chain amino acid ABC transporter, ATP-binding protein           | COG0411 | E | GI 5 | 100.00 | 0.00  |
| RCA23_c12010 | branched-chain amino acid ABC transporter, permease protein              | COG4177 | E | GI 5 | 100.00 | 46.14 |
| RCA23_c12020 | branched-chain amino acid ABC transporter, permease protein              | COG0559 | E | GI 5 | 92.06  | 14.54 |
| RCA23_c12030 | branched-chain amino acid ABC transporter, periplasmic binding protein   | COG0683 | E | GI 5 | 0.00   | 45.84 |
| RCA23_c12040 | enoyl-CoA hydratase/carnithine racemase                                  | COG1024 | I | GI 5 | 0.00   | 14.86 |
| RCA23_c12050 | acetyl-CoA synthase-like protein                                         | COG0318 | I | GI 5 | 77.41  | 47.70 |
| RCA23_c12060 | dehydrogenase iron-sulfur-binding subunit                                | COG2080 | C | GI 5 | 100.00 | 23.73 |
| RCA23_c12070 | dehydrogenase FAD-binding subunit                                        | COG1319 | C | GI 5 | 92.00  | 25.70 |
| RCA23_c12080 | dehydrogenase molybdenum-binding subunit                                 | COG1529 | C | GI 5 | 0.00   | 12.86 |
| RCA23_c12090 | putative HTH-type transcriptional regulator, AraC family                 | COG2207 | K | GI 5 | 0.00   | 0.00  |
| RCA23_c12100 | periplasmic binding protein-like                                         | COG1879 | G | GI 5 | 0.00   | 0.00  |
| RCA23_c12110 | ROK family transcriptional repressor                                     | COG1940 | K | GI 5 | 0.00   | 8.48  |
| RCA23_c12120 | xylose isomerase                                                         | COG1082 | G | GI 5 | 0.00   | 0.00  |
| RCA23_c12130 | sugar ABC transporter, periplasmic binding protein                       | COG1879 | G | GI 5 | 0.00   | 0.00  |
| RCA23_c12140 | putative oxidoreductase                                                  | COG0673 | R | GI 5 | 0.00   | 0.00  |
| RCA23_c12150 | sugar ABC transporter, ATP-binding protein                               | COG1129 | G | GI 5 | 0.00   | 6.98  |
| RCA23_c12160 | sugar ABC transporter, permease protein                                  | COG1172 | G | GI 5 | 0.00   | 0.00  |
| RCA23_c12170 | hypothetical protein, monooxygenase-like                                 | COG1359 | S | GI 5 | 0.00   | 0.00  |
| RCA23_c12180 | hypothetical protein                                                     | COG1082 | G | GI 5 | 0.00   | 62.23 |
| RCA23_c12190 | putative oxidoreductase                                                  | COG0673 | R | GI 5 | 0.00   | 11.02 |
| RCA23_c12200 | peptidase M20D, amidohydrolase                                           | COG1473 | R | GI 5 | 100.00 | 27.15 |
| RCA23_c12210 | X-Pro dipeptidase                                                        | COG0006 | E | GI 5 | 46.86  | 29.93 |
| RCA23_c12220 | hypothetical protein                                                     |         |   | GI 5 | 0.00   | 0.00  |
| RCA23_c12230 | hypothetical protein, transmembrane                                      |         |   | GI 5 | 0.00   | 0.00  |
| RCA23_c12240 | hypothetical protein, DNA breaking rejoining enzymes family protein-like |         |   | GI 5 | 88.64  | 0.00  |
| RCA23_c12250 | hypothetical protein                                                     |         |   | GI 5 | 0.00   | 0.00  |
| RCA23_c12260 | hypothetical protein                                                     |         |   | GI 5 | 0.00   | 17.82 |
| RCA23_c12270 | hypothetical protein                                                     |         |   | GI 5 | 0.00   | 0.00  |
| RCA23_c12280 | type I restriction-modification system, M subunit                        | COG0286 | V | GI 5 | 0.00   | 0.00  |
| RCA23_c12290 | type I restriction-modification system, S subunit                        | COG0732 | V | GI 5 | 0.00   | 0.00  |
| RCA23_c12300 | type I restriction-modification system, R subunit                        | COG0610 | V | GI 5 | 0.00   | 3.78  |
| RCA23_c12310 | hypothetical protein                                                     | COG3012 | S | GI 5 | 0.00   | 0.00  |

|              |                                                           |         |   |      |        |        |
|--------------|-----------------------------------------------------------|---------|---|------|--------|--------|
| RCA23_c12320 | hypothetical protein                                      | COG2865 | K | GI 5 | 0.00   | 0.00   |
| RCA23_c12330 | hypothetical protein                                      |         |   | GI 5 | 0.00   | 0.00   |
| RCA23_c12340 | hypothetical protein, DNA helicase-like protein           |         |   | GI 5 | 0.00   | 0.00   |
| RCA23_c12350 | hypothetical protein                                      |         |   | GI 5 | 0.00   | 0.00   |
| RCA23_c12360 | integrase                                                 | COG0582 | L | GI 5 | 0.00   | 0.00   |
| RCA23_c12370 | hypothetical protein                                      |         |   | GI 5 | 0.00   | 0.00   |
| RCA23_c12380 | hypothetical protein                                      |         |   | GI 5 | 0.00   | 0.00   |
| RCA23_c12390 | hypothetical protein                                      |         |   | GI 5 | 0.00   | 0.00   |
| RCA23_c12400 | hypothetical protein                                      |         |   | GI 5 | 0.00   | 0.00   |
| RCA23_c12410 | hypothetical protein, DUF1994                             |         |   | GI 5 | 100.00 | 47.10  |
| RCA23_c12420 | exonuclease I                                             | COG2925 | L | GI 5 | 100.00 | 70.01  |
| RCA23_c12430 | transpeptidase, penicillin binding protein                | COG4953 | M | GI 5 | 28.88  | 44.78  |
| RCA23_c12440 | hypothetical protein                                      | COG2373 | R | GI 5 | 22.49  | 26.91  |
| RCA23_c12450 | hypothetical protein                                      |         |   | GI 5 | 0.00   | 24.93  |
| RCA23_c12460 | hypothetical protein                                      |         |   | GI 5 | 0.00   | 0.00   |
| RCA23_c12470 | type III restriction enzyme, res subunit                  | COG1061 | K | GI 5 | 0.00   | 31.71  |
| RCA23_c12480 | putative type III restriction system protein, mod subunit |         |   | GI 5 | 0.00   | 53.63  |
| RCA23_c12490 | putative serine/threonine protein kinase                  | COG0515 | R | GI 5 | 0.00   | 20.27  |
| RCA23_c12500 | serine/threonine protein phosphatase PrpC                 | COG0631 | T | GI 5 | 0.00   | 37.50  |
| RCA23_c12510 | DNA helicase, UvrD/REP type                               | COG0210 | L | GI 5 | 0.00   | 0.00   |
| RCA23_c12520 | hypothetical protein                                      | COG1463 | Q | GI 5 | 0.00   | 0.00   |
| RCA23_c12530 | hypothetical protein, OmpA/MotB-like                      | COG1360 | N | GI 5 | 0.00   | 0.00   |
| RCA23_c12540 | hypothetical protein                                      |         |   | GI 5 | 0.00   | 0.00   |
| RCA23_c12550 | ATP-dependent helicase                                    | COG0553 | K | GI 5 | 0.00   | 0.00   |
| RCA23_c12560 | hypothetical protein                                      |         |   | GI 5 | 0.00   | 0.00   |
| RCA23_c12570 | hypothetical protein                                      |         |   | GI 5 | 0.00   | 0.00   |
| RCA23_c12580 | hypothetical protein                                      |         |   | GI 5 | 0.00   | 0.00   |
| RCA23_c12590 | hypothetical protein                                      |         |   | GI 5 | 49.19  | 0.00   |
| RCA23_c12600 | hypothetical protein                                      |         |   | GI 5 | 89.56  | 0.00   |
| RCA23_c12610 | hypothetical protein                                      |         |   | GI 5 | 0.00   | 0.00   |
| RCA23_c12620 | hypothetical protein                                      |         |   | GI 5 | 0.00   | 0.00   |
| RCA23_c12630 | integrase                                                 | COG2801 | L | GI 5 | 0.00   | 100.00 |
| RCA23_c12640 | hypothetical protein                                      |         |   | GI 5 | 0.00   | 0.00   |



|              |                                                      |         |   |      |        |        |
|--------------|------------------------------------------------------|---------|---|------|--------|--------|
| RCA23_c12650 | hypothetical protein                                 |         |   | GI 5 | 0.00   | 0.00   |
| RCA23_c12660 | DNA integration/recombination/inversion protein      |         |   | GI 5 | 0.00   | 0.00   |
| RCA23_c12690 | putative beta-lactamase-like protein                 | COG0491 | R |      | 100.00 | 100.00 |
| RCA23_c12680 | osmolarity sensor protein EnvZ                       | COG0642 | T |      | 100.00 | 100.00 |
| RCA23_c12700 | hypothetical protein                                 |         |   |      | 100.00 | 100.00 |
| RCA23_c12710 | 50S ribosomal protein L21                            | COG0261 | J |      | 100.00 | 100.00 |
| RCA23_c12720 | 50S ribosomal protein L27                            | COG0211 | J |      | 100.00 | 100.00 |
| RCA23_c12730 | hypothetical protein, LysE type translocator         | COG1280 | E |      | 100.00 | 100.00 |
| RCA23_c12740 | putative acetyltransferase                           | COG1670 | J |      | 100.00 | 100.00 |
| RCA23_c12750 | GCN5-like N-acetyltransferase                        | COG1670 | J |      | 100.00 | 100.00 |
| RCA23_c12760 | GTP-binding protein Obg                              | COG0536 | R |      | 100.00 | 100.00 |
| RCA23_c12770 | glutamate 5-kinase ProB                              | COG0263 | E |      | 85.73  | 99.01  |
| RCA23_c12780 | gamma-glutamyl phosphate reductase ProA              | COG0014 | E |      | 80.35  | 88.94  |
| RCA23_c12800 | hypothetical protein                                 | COG5385 | S |      | 100.00 | 100.00 |
| RCA23_c12790 | hypothetical protein                                 |         |   |      | 100.00 | 100.00 |
| RCA23_c12810 | hypothetical protein                                 | COG3176 | R |      | 100.00 | 100.00 |
| RCA23_c12820 | putative phosphate acyltransferase                   | COG0204 | I |      | 100.00 | 98.29  |
| RCA23_c12830 | thiamine-phosphate pyrophosphorylase ThiE            | COG0352 | H |      | 100.00 | 92.56  |
| RCA23_c12840 | tRNA (cytidine/uridine-2'-O-)-methyltransferase TrmJ | COG0565 | J |      | 100.00 | 100.00 |
| RCA23_c12850 | heme A synthase CtaA                                 | COG1612 | O |      | 100.00 | 100.00 |
| RCA23_c12860 | thermostable carboxypeptidase 1                      | COG2317 | E |      | 100.00 | 97.64  |
| RCA23_c12870 | DNA gyrase subunit A                                 | COG0188 | L |      | 100.00 | 98.76  |
| RCA23_c12880 | hypothetical protein                                 | COG1495 | O |      | 100.00 | 100.00 |
| RCA23_c12890 | DedA family protein                                  | COG1238 | S |      | 100.00 | 100.00 |
| RCA23_c12900 | hypothetical protein                                 |         |   | GI 6 | 100.00 | 98.00  |
| RCA23_c12910 | putative snoaL-like polyketide cyclase               | COG3631 | R | GI 6 | 0.00   | 87.55  |
| RCA23_c12920 | hypothetical protein, DUF1330                        | COG5470 | S | GI 6 | 0.00   | 100.00 |
| RCA23_c12930 | hypothetical protein, DUF3303                        |         |   | GI 6 | 0.00   | 100.00 |
| RCA23_c12940 | hypothetical protein, transmembrane                  |         |   | GI 6 | 100.00 | 0.00   |
| RCA23_c12950 | hypothetical protein, transmembrane                  |         |   | GI 6 | 100.00 | 0.00   |
| RCA23_c12960 | integrase                                            | COG2801 | L | GI 6 | 2.13   | 0.00   |
| RCA23_c12970 | hypothetical protein                                 |         |   | GI 6 | 0.00   | 0.00   |
| RCA23_c12980 | site-specific recombinase, resolvase family protein  | COG1961 | L | GI 6 | 0.00   | 0.00   |

|              |                                                                    |         |   |      |        |        |
|--------------|--------------------------------------------------------------------|---------|---|------|--------|--------|
| RCA23_c12990 | hypothetical protein                                               | COG4731 | S | GI 6 | 0.00   | 100.00 |
| RCA23_c13000 | hypothetical protein                                               |         |   | GI 6 | 0.00   | 0.00   |
| RCA23_c13010 | transposase                                                        | COG3415 | L | GI 6 | 0.00   | 0.00   |
| RCA23_c13020 | ribosomal protein S21                                              | COG0828 | J | GI 6 | 100.00 | 100.00 |
| RCA23_c13030 | hypothetical protein                                               |         |   | GI 6 | 100.00 | 45.83  |
| RCA23_c13040 | integrase                                                          | COG2801 | L | GI 6 | 6.48   | 0.00   |
| RCA23_c13050 | hypothetical protein                                               |         |   | GI 6 | 100.00 | 85.99  |
| RCA23_c13060 | putative phage integrase                                           | COG0582 | L | GI 6 | 100.00 | 100.00 |
| RCA23_c13080 | putative phage integrase                                           | COG0582 | L | GI 6 | 100.00 | 98.71  |
| RCA23_c13090 | hypothetical protein, GYD domain                                   | COG4274 | S | GI 6 | 0.00   | 0.00   |
| RCA23_c13100 | hypothetical protein                                               |         |   | GI 6 | 0.00   | 12.95  |
| RCA23_c13110 | hypothetical protein                                               |         |   | GI 6 | 0.00   | 100.00 |
| RCA23_c13120 | hypothetical protein                                               |         |   | GI 6 | 73.28  | 65.53  |
| RCA23_c13130 | integrase                                                          | COG2801 | L | GI 6 | 0.00   | 0.00   |
| RCA23_c13140 | hypothetical protein                                               | COG5586 | S | GI 6 | 90.17  | 100.00 |
| RCA23_c13150 | hypothetical protein                                               |         |   | GI 6 | 100.00 | 84.93  |
| RCA23_c13160 | hypothetical protein                                               |         |   | GI 6 | 100.00 | 100.00 |
| RCA23_c13170 | hypothetical protein                                               | COG4274 | S | GI 6 | 100.00 | 100.00 |
| RCA23_c13180 | hypothetical protein                                               |         |   | GI 6 | 84.67  | 100.00 |
| RCA23_c13190 | hypothetical protein                                               |         |   | GI 6 | 0.00   | 100.00 |
| RCA23_c13210 | phosphoribosylformylglycinamide cyclo-ligase PurM                  | COG0150 | F |      | 90.87  | 100.00 |
| RCA23_c13220 | phosphoribosylglycinamide formyltransferase PurN                   | COG0299 | F |      | 100.00 | 100.00 |
| RCA23_c13230 | ribonuclease D                                                     | COG0349 | J |      | 100.00 | 100.00 |
| RCA23_c13240 | SufE-like protein                                                  | COG2166 | R |      | 100.00 | 81.51  |
| RCA23_c13250 | hypothetical protein                                               |         |   |      | 100.00 | 100.00 |
| RCA23_c13260 | putative methionine synthase (B12 dependent) subunit 2             | COG5012 | R |      | 100.00 | 100.00 |
| RCA23_c13270 | putative methionine synthase (B12 dependent) subunit 1             | COG0646 | E |      | 100.00 | 100.00 |
| RCA23_c13280 | phosphoribosylaminoimidazole-succinocarboxamide synthase PurC      | COG0152 | F |      | 100.00 | 99.77  |
| RCA23_c13290 | phosphoribosylformylglycinamide (FGAM) synthase PurS               | COG1828 | F |      | 100.00 | 100.00 |
| RCA23_c13300 | phosphoribosylformylglycinamide synthase PurQ                      | COG0047 | F |      | 100.00 | 100.00 |
| RCA23_c13310 | C4-dicarboxylate transport sensor protein DctB                     | COG4191 | T |      | 100.00 | 100.00 |
| RCA23_c13320 | C4-dicarboxylate transport transcriptional regulatory protein DctD | COG2204 | T |      | 100.00 | 100.00 |
| RCA23_c13330 | ribonuclease E                                                     | COG1530 | J |      | 100.00 | 99.28  |



|              |                                                         |         |   |        |        |
|--------------|---------------------------------------------------------|---------|---|--------|--------|
| RCA23_c13340 | putative sulfurtransferase tusA                         | COG0425 | O | 100.00 | 100.00 |
| RCA23_c13350 | cytochrome C biogenesis protein transmembrane region    | COG0785 | O | 100.00 | 100.00 |
| RCA23_c13360 | hypothetical protein                                    |         |   | 100.00 | 100.00 |
| RCA23_c13370 | putative cytochrome P450                                | COG2124 | Q | 100.00 | 100.00 |
| RCA23_c13380 | DNA alkylation repair enzyme                            | COG4912 | L | 100.00 | 100.00 |
| RCA23_c13390 | hypothetical protein                                    | COG3153 | R | 100.00 | 100.00 |
| RCA23_c13400 | glucosamine--fructose-6-phosphate aminotransferase GlmS | COG0449 | M | 100.00 | 100.00 |
| RCA23_c13410 | bifunctional protein GlmU                               | COG1207 | M | 100.00 | 100.00 |
| RCA23_c13420 | putative HAD-superfamily hydrolase                      | COG0546 | R | 100.00 | 100.00 |
| RCA23_c13440 | MmgE/PrpD family protein                                | COG2079 | R | 100.00 | 99.16  |
| RCA23_c13430 | putative pyridoxal-phosphate-dependent aminotransferase | COG0399 | M | 94.55  | 87.12  |
| RCA23_c13450 | isovaleryl-CoA dehydrogenase                            | COG1960 | I | 100.00 | 92.78  |
| RCA23_c13460 | hypothetical protein                                    |         |   | 100.00 | 100.00 |
| RCA23_c13470 | methylcrotonoyl-CoA carboxylase beta subunit MccB       | COG4799 | I | 100.00 | 100.00 |
| RCA23_c13480 | hypothetical protein                                    |         |   | 100.00 | 94.08  |
| RCA23_c13490 | methylcrotonoyl-CoA carboxylase alpha subunit MccA      | COG4770 | I | 100.00 | 98.45  |
| RCA23_c13500 | hydroxymethylglutaryl-CoA lyase MvaB                    | COG0119 | E | 100.00 | 100.00 |
| RCA23_c13510 | putative methylglutaconyl-CoA hydratase                 | COG1024 | I | 100.00 | 100.00 |
| RCA23_c13520 | NADH-quinone oxidoreductase subunit A                   | COG0838 | C | 100.00 | 100.00 |
| RCA23_c13530 | NADH-quinone oxidoreductase subunit NuobB               | COG0377 | C | 100.00 | 100.00 |
| RCA23_c13540 | hypothetical protein DUF2158                            | COG5475 | S | 100.00 | 100.00 |
| RCA23_c13550 | NADH-quinone oxidoreductase subunit C                   | COG0852 | C | 100.00 | 100.00 |
| RCA23_c13560 | hypothetical protein                                    |         |   | 100.00 | 100.00 |
| RCA23_c13570 | NADH-quinone oxidoreductase subunit D                   | COG0649 | C | 100.00 | 97.94  |
| RCA23_c13580 | NADH-quinone oxidoreductase subunit E                   | COG1905 | C | 100.00 | 84.88  |
| RCA23_c13590 | hypothetical protein                                    |         |   | 100.00 | 100.00 |
| RCA23_c13600 | NADH-quinone oxidoreductase subunit F                   | COG1894 | C | 100.00 | 95.14  |
| RCA23_c13610 | hypothetical protein                                    |         |   | 100.00 | 96.79  |
| RCA23_c13620 | NADH-quinone oxidoreductase subunit G                   | COG1034 | C | 100.00 | 98.27  |
| RCA23_c13630 | hypothetical protein                                    |         |   | 100.00 | 88.76  |
| RCA23_c13640 | NADH-quinone oxidoreductase subunit H                   | COG1005 | C | 100.00 | 91.62  |
| RCA23_c13650 | NADH-quinone oxidoreductase subunit I                   | COG1143 | C | 100.00 | 100.00 |
| RCA23_c13660 | NADH-quinone oxidoreductase subunit J                   | COG0839 | C | 100.00 | 100.00 |

|              |                                                  |         |   |        |        |
|--------------|--------------------------------------------------|---------|---|--------|--------|
| RCA23_c13670 | NADH-quinone oxidoreductase subunit K            | COG0713 | C | 100.00 | 100.00 |
| RCA23_c13680 | NADH-quinone oxidoreductase subunit L            | COG1009 | C | 100.00 | 100.00 |
| RCA23_c13690 | NADH-quinone oxidoreductase subunit M            | COG1008 | C | 100.00 | 100.00 |
| RCA23_c13700 | NADH-quinone oxidoreductase subunit N            | COG1007 | C | 100.00 | 100.00 |
| RCA23_c13710 | biotin-[acetyl-CoA-carboxylase] ligase           | COG0340 | H | 100.00 | 100.00 |
| RCA23_c13720 | type III pantothenate kinase CoaX                | COG1521 | K | 100.00 | 100.00 |
| RCA23_c13730 | putative ribonuclease                            | COG0595 | R | 100.00 | 100.00 |
| RCA23_c13740 | ATP-dependent RNA helicase RhIE                  | COG0513 | L | 100.00 | 95.14  |
| RCA23_c13750 | peptide chain release factor 3                   | COG4108 | J | 100.00 | 93.25  |
| RCA23_c13760 | hypothetical protein                             |         |   | 100.00 | 89.10  |
| RCA23_c13770 | putative short chain dehydrogenase               | COG1028 | I | 100.00 | 90.77  |
| RCA23_c13780 | arsenite methyltransferase                       | COG2226 | H | 100.00 | 100.00 |
| RCA23_c13790 | Fe(3+) ions import ATP-binding protein FbpC      | COG3842 | E | 51.16  | 90.44  |
| RCA23_c13800 | putative helix-turn-helix protein                | COG2378 | K | 76.75  | 100.00 |
| RCA23_c13810 | sec-independent protein translocase protein TatA | COG1826 | U | 100.00 | 100.00 |
| RCA23_c13820 | sec-independent protein translocase protein TatB | COG1826 | U | 36.47  | 100.00 |
| RCA23_c13830 | sec-independent protein translocase protein TatC | COG0805 | U | 4.94   | 97.98  |
| RCA23_c13840 | hypothetical protein DUF815                      | COG2607 | R | 100.00 | 100.00 |
| RCA23_c13850 | putative peptidoglycan-binding peptidase         | COG0739 | M | 100.00 | 100.00 |
| RCA23_c13860 | protein-L-isoaspartate O-methyltransferase Pcm   | COG2518 | O | 100.00 | 100.00 |
| RCA23_c13870 | 5'-nucleotidase SurE                             | COG0496 | R | 100.00 | 100.00 |
| RCA23_c13880 | putative short chain dehydrogenase               | COG1028 | I | 100.00 | 100.00 |
| RCA23_c13890 | amidophosphoribosyltransferase PurF              | COG0034 | F | 100.00 | 98.57  |
| RCA23_c13900 | putative colicin V production protein            |         |   | 100.00 | 100.00 |
| RCA23_c13910 | DNA repair protein RadA                          | COG1066 | O | 100.00 | 100.00 |
| RCA23_c13920 | ABC transporter ATP-binding protein              | COG1127 | Q | 100.00 | 100.00 |
| RCA23_c13930 | hypothetical protein DUF140                      | COG0767 | Q | 100.00 | 100.00 |
| RCA23_c13940 | alanine racemase, biosynthetic                   | COG0787 | M | 100.00 | 100.00 |
| RCA23_c13950 | replicative DNA helicase DnaB                    | COG0305 | L | 100.00 | 100.00 |
| RCA23_c13960 | orotate phosphoribosyltransferase PyrE           | COG0461 | F | 100.00 | 100.00 |
| RCA23_c13970 | dihydroorotase PyrC                              | COG0418 | F | 100.00 | 95.58  |
| RCA23_c13980 | hypothetical protein                             |         |   | 100.00 | 100.00 |
| RCA23_c13990 | hypothetical protein                             |         |   | 100.00 | 63.96  |

|              |                                                                               |         |   |      |        |        |
|--------------|-------------------------------------------------------------------------------|---------|---|------|--------|--------|
| RCA23_c14000 | hypothetical protein                                                          |         |   |      | 100.00 | 87.67  |
| RCA23_c14010 | malate dehydrogenase Mdh                                                      | COG0039 | C |      | 100.00 | 100.00 |
| RCA23_c14020 | citrate lyase beta subunit CitE                                               | COG2301 | G |      | 100.00 | 100.00 |
| RCA23_c14030 | putative mesaconyl-CoA hydratase                                              | COG2030 | I |      | 100.00 | 100.00 |
| RCA23_c14040 | succinate dehydrogenase cytochrome b556 subunit SdhC                          | COG2009 | C |      | 100.00 | 100.00 |
| RCA23_c14050 | succinate dehydrogenase hydrophobic membrane anchor subunit SdhD              | COG2142 | C |      | 100.00 | 100.00 |
| RCA23_c14060 | succinate dehydrogenase flavoprotein subunit SdhA                             | COG1053 | C |      | 79.62  | 100.00 |
| RCA23_c14070 | hypothetical protein                                                          |         |   |      | 100.00 | 100.00 |
| RCA23_c14080 | succinate dehydrogenase iron-sulfur subunit SdhB                              | COG0479 | C |      | 100.00 | 100.00 |
| RCA23_c14090 | purine nucleoside phosphorylase deoD-type                                     | COG0813 | F |      | 100.00 | 91.91  |
| RCA23_c14100 | acetyltransferase                                                             | COG1246 | E |      | 100.00 | 94.56  |
| RCA23_c14110 | tryptophan synthase alpha chain TrpA                                          | COG0159 | E |      | 100.00 | 95.03  |
| RCA23_c14120 | GTP-dependent nucleic acid-binding protein EngD                               | COG0012 | J |      | 84.61  | 100.00 |
| RCA23_c14130 | Non-specific ribonucleoside hydrolase rihC                                    | COG1957 | F |      | 94.70  | 100.00 |
| RCA23_c14150 | hypothetical protein DUF583                                                   | COG1664 | M | GI 7 | 100.00 | 61.64  |
| RCA23_c14160 | protease HtpX                                                                 | COG0501 | O | GI 7 | 100.00 | 82.72  |
| RCA23_c14170 | histone deacetylase                                                           | COG0123 | B | GI 7 | 100.00 | 66.45  |
| RCA23_c14180 | peripheral-type benzodiazepine receptor/signal transduction protein TspO      | COG3476 | T | GI 7 | 100.00 | 48.84  |
| RCA23_c14190 | DNA-invertase Hin                                                             | COG1961 | L | GI 7 | 60.90  | 12.61  |
| RCA23_c14200 | hypothetical protein                                                          |         |   | GI 7 | 0.00   | 0.00   |
| RCA23_c14210 | hypothetical protein                                                          |         |   | GI 7 | 0.00   | 100.00 |
| RCA23_c14220 | hypothetical protein, RmlC-like cupin family                                  | COG3450 | R | GI 7 | 0.00   | 77.25  |
| RCA23_c14230 | integrase                                                                     | COG4974 | L | GI 7 | 99.30  | 63.65  |
| RCA23_c14240 | hypothetical membrane protein                                                 |         |   | GI 7 | 100.00 | 89.26  |
| RCA23_c14260 | hypothetical protein                                                          | COG4530 | S |      | 100.00 | 100.00 |
| RCA23_c14270 | hypothetical protein DUF45                                                    | COG1451 | R |      | 100.00 | 100.00 |
| RCA23_c14280 | HTH-type transcriptional regulator, GntR family                               | COG1802 | K |      | 100.00 | 100.00 |
| RCA23_c14290 | dihydrolipoyl dehydrogenase Lpd                                               | COG1249 | C |      | 100.00 | 100.00 |
| RCA23_c14300 | dihydrolipoyllysine-residue succinyltransferase component of 2-oxoglutarate c | COG0508 | C |      | 100.00 | 96.66  |
| RCA23_c14310 | 2-oxoglutarate dehydrogenase E1 component SucA                                | COG0567 | C |      | 88.95  | 100.00 |
| RCA23_c14320 | succinyl-CoA ligase [ADP-forming] alpha subunit SucD                          | COG0074 | C |      | 100.00 | 100.00 |
| RCA23_c14330 | succinyl-CoA ligase [ADP-forming] beta subunit SucC                           | COG0045 | C |      | 100.00 | 100.00 |
| RCA23_c14340 | butyryl-CoA dehydrogenase                                                     | COG1960 | I |      | 100.00 | 100.00 |

|              |                                                             |         |   |        |        |
|--------------|-------------------------------------------------------------|---------|---|--------|--------|
| RCA23_c14350 | translation initiation factor IF-3                          | COG0290 | J | 100.00 | 100.00 |
| RCA23_c14360 | ferredoxin--NADP reductase Fpr                              | COG1018 | C | 100.00 | 100.00 |
| RCA23_c14370 | hypothetical protein                                        | COG3749 | S | 100.00 | 85.29  |
| RCA23_c14380 | cysH <sup>1</sup>                                           | COG0175 | E | 100.00 | 100.00 |
| RCA23_c14390 | cysI/sir: sulfite reductase (ferredoxin)                    | COG0155 | P | 100.00 | 100.00 |
| RCA23_c14400 | hypothetical protein                                        |         |   | 100.00 | 100.00 |
| RCA23_c14410 | siroheme synthase CysG                                      | COG0007 | H | 100.00 | 100.00 |
| RCA23_c14420 | HTH-type transcriptional regulator, AsnC family             | COG1522 | K | 100.00 | 100.00 |
| RCA23_c14450 | peptidase                                                   | COG0624 | E | 100.00 | 100.00 |
| RCA23_c14460 | hypothetical protein                                        | COG1426 | S | 100.00 | 100.00 |
| RCA23_c14470 | 4-hydroxy-3-methylbut-2-en-1-yl diphosphate synthase IspG   | COG0821 | I | 100.00 | 95.06  |
| RCA23_c14480 | TPR-repeat containing protein                               | COG4783 | R | 98.33  | 100.00 |
| RCA23_c14490 | aspartate aminotransferase                                  | COG0436 | E | 100.00 | 89.56  |
| RCA23_c14500 | penicillin-binding protein 1A                               | COG5009 | M | 100.00 | 100.00 |
| RCA23_c14510 | peptide chain release factor 2                              | COG1186 | J | 41.96  | 93.96  |
| RCA23_c14520 | hypothetical protein DUF583                                 | COG1664 | M | 0.00   | 100.00 |
| RCA23_c14530 | putative peptidase, M23 family                              | COG0739 | M | 55.06  | 100.00 |
| RCA23_c14540 | hypothetical protein DUF455                                 | COG2833 | S | 100.00 | 100.00 |
| RCA23_c14550 | peroxiredoxin Bcp                                           | COG1225 | O | 100.00 | 100.00 |
| RCA23_c14560 | hypothetical protein                                        |         |   | 100.00 | 95.00  |
| RCA23_c14570 | S-adenosylmethionine:tRNA ribosyltransferase-isomerase QueA | COG0809 | J | 100.00 | 100.00 |
| RCA23_c14580 | MFS-type transporter                                        |         |   | 100.00 | 100.00 |
| RCA23_c14590 | hypothetical protein DUF924                                 | COG3803 | S | 100.00 | 100.00 |
| RCA23_c14600 | dihydrolipoyl dehydrogenase Lpd                             | COG1249 | C | 100.00 | 99.79  |
| RCA23_c14610 | uvrABC system protein A                                     | COG0178 | L | 100.00 | 99.37  |
| RCA23_c14620 | MmgE/PrpD family protein                                    | COG2079 | R | 100.00 | 100.00 |
| RCA23_c14630 | 3-hydroxyisobutyrate dehydrogenase MmsB                     | COG2084 | I | 100.00 | 100.00 |
| RCA23_c14640 | 3-hydroxyisobutyryl-CoA hydrolase                           | COG1024 | I | 100.00 | 100.00 |
| RCA23_c14650 | isobutyryl-CoA dehydrogenase                                | COG1960 | I | 100.00 | 95.32  |
| RCA23_c14660 | methylmalonate-semialdehyde dehydrogenase MmsA              | COG1012 | C | 100.00 | 100.00 |
| RCA23_c14670 | putative HTH-type transcriptional regulator, LysR family    | COG0583 | K | 100.00 | 100.00 |
| RCA23_c14680 | phosphopantetheine adenylyltransferase CoaD                 | COG0669 | H | 100.00 | 100.00 |
| RCA23_c14690 | glyceraldehyde-3-phosphate dehydrogenase Gap                | COG0057 | G | 100.00 | 100.00 |

|              |                                                                     |         |   |        |        |
|--------------|---------------------------------------------------------------------|---------|---|--------|--------|
| RCA23_c14700 | glyceraldehyde-3-phosphate dehydrogenase Gap                        | COG0057 | G | 100.00 | 100.00 |
| RCA23_c14710 | transketolase TktA                                                  | COG0021 | G | 95.09  | 95.93  |
| RCA23_c14720 | hypothetical protein                                                |         |   | 100.00 | 100.00 |
| RCA23_c14730 | cell division protein ZapA                                          | COG3027 | S | 100.00 | 100.00 |
| RCA23_c14740 | putative glutaredoxin                                               | COG0278 | O | 100.00 | 100.00 |
| RCA23_c14750 | hypothetical protein                                                |         |   | 100.00 | 100.00 |
| RCA23_c14760 | hypothetical protein, BofA-like                                     | COG0271 | T | 100.00 | 100.00 |
| RCA23_c14770 | phosphoribosylformylglycinamide synthase PurL                       | COG0046 | F | 100.00 | 97.42  |
| RCA23_c14780 | HTH-type transcriptional regulator, LysR family                     | COG0583 | K | 100.00 | 100.00 |
| RCA23_c14790 | hypothetical protein, pyruvate ferredoxin/ferredoxin oxidoreductase | COG4231 | C | 100.00 | 97.99  |
| RCA23_c14800 | glutamate racemase Murl                                             | COG0796 | M | 100.00 | 100.00 |
| RCA23_c14810 | N-acetyl-gamma-glutamyl-phosphate reductase ArgC                    | COG0002 | E | 86.88  | 98.93  |
| RCA23_c14820 | cytochrome c-type biogenesis protein CcmE                           | COG2332 | O | 54.53  | 100.00 |
| RCA23_c14830 | cytochrome c-type biogenesis protein CcmF                           | COG1138 | O | 100.00 | 99.59  |
| RCA23_c14840 | cytochrome c-type biogenesis protein CcmH                           | COG3088 | O | 100.00 | 100.00 |
| RCA23_c14850 | putative enoyl-CoA hydratase FadB                                   | COG1024 | I | 100.00 | 100.00 |
| RCA23_c14860 | hypothetical protein                                                |         |   | 100.00 | 100.00 |
| RCA23_c14870 | citrate synthase GltA                                               | COG0372 | C | 100.00 | 94.65  |
| RCA23_c14880 | glutamyl-tRNA synthase 2                                            | COG0008 | J | 100.00 | 100.00 |
| RCA23_c14890 | hypothetical protein competence protein E                           | COG0658 | R | 100.00 | 100.00 |
| RCA23_c14900 | LexA repressor                                                      | COG1974 | K | 100.00 | 100.00 |
| RCA23_c14910 | molybdopterin biosynthesis protein MoeA                             | COG0303 | H | 100.00 | 95.24  |
| RCA23_c14920 | molybdenum cofactor biosynthesis protein MoaC                       | COG0315 | H | 100.00 | 100.00 |
| RCA23_c14930 | indole-3-glycerol phosphate synthase TrpC                           | COG0134 | E | 100.00 | 100.00 |
| RCA23_c14940 | anthranilate phosphoribosyltransferase TrpD                         | COG0547 | E | 100.00 | 91.67  |
| RCA23_c14950 | anthranilate synthase component TrpG                                | COG0512 | E | 100.00 | 99.48  |
| RCA23_c14960 | hypothetical protein, divergent polysaccharide deacetylase          |         |   | 100.00 | 100.00 |
| RCA23_c14970 | hypothetical protein                                                |         |   | 100.00 | 100.00 |
| RCA23_c14990 | hypothetical protein                                                | COG3108 | S | 100.00 | 100.00 |
| RCA23_c15000 | putative L,D-transpeptidase YcbB                                    | COG2989 | S | 100.00 | 100.00 |
| RCA23_c15010 | UDP-3-O-[3-hydroxymyristoyl] glucosamine N-acyltransferase LpxD     | COG1044 | M | 100.00 | 100.00 |
| RCA23_c15020 | acyl carrier protein                                                | COG0236 | I | 100.00 | 100.00 |
| RCA23_c15030 | 3-oxoacyl-[acyl-carrier-protein] synthase FabF                      | COG0304 | I | 100.00 | 100.00 |

|              |                                                                            |         |   |        |        |
|--------------|----------------------------------------------------------------------------|---------|---|--------|--------|
| RCA23_c15040 | hypothetical protein, invasion protein B                                   | COG5342 | R | 100.00 | 100.00 |
| RCA23_c15050 | inner membrane protein                                                     | COG4536 | P | 90.76  | 96.61  |
| RCA23_c15060 | tyrosine recombinase XerD                                                  | COG4974 | L | 100.00 | 100.00 |
| RCA23_c15070 | hypothetical protein                                                       |         |   | 100.00 | 100.00 |
| RCA23_c15080 | hypothetical protein                                                       |         |   | 100.00 | 100.00 |
| RCA23_c15090 | shikimate kinase AroK                                                      | COG0703 | E | 100.00 | 100.00 |
| RCA23_c15100 | 3-dehydroquinate synthase AroB                                             | COG0337 | E | 100.00 | 100.00 |
| RCA23_c15110 | single-stranded DNA-binding protein                                        | COG0629 | L | 100.00 | 100.00 |
| RCA23_c15120 | glutathione import ATP-binding protein GsiA                                | COG0444 | E | 100.00 | 98.51  |
| RCA23_c15130 | putative ABC transporter inner membrane component                          | COG1173 | E | 100.00 | 94.69  |
| RCA23_c15140 | putative ABC transporter permease protein                                  | COG0601 | E | 100.00 | 100.00 |
| RCA23_c15150 | ABC transporter extracellular solute-binding protein                       | COG0747 | E | 60.90  | 100.00 |
| RCA23_c15160 | tRNA delta(2)-isopentenylpyrophosphate transferase MiaA                    | COG0324 | J | 74.97  | 100.00 |
| RCA23_c15170 | uridylate kinase PyrH                                                      | COG0528 | F | 100.00 | 100.00 |
| RCA23_c15180 | ribosome recycling factor Frr                                              | COG0233 | J | 100.00 | 100.00 |
| RCA23_c15190 | undecaprenyl pyrophosphate synthase UppS                                   | COG0020 | I | 100.00 | 100.00 |
| RCA23_c15200 | putative cytidyltransferase                                                | COG0575 | I | 100.00 | 100.00 |
| RCA23_c15210 | 1-deoxy-D-xylulose 5-phosphate reductoisomerase Dxr                        | COG0743 | I | 100.00 | 98.71  |
| RCA23_c15220 | RIP metalloprotease RseP                                                   | COG0750 | M | 100.00 | 100.00 |
| RCA23_c15230 | putative outer membrane assembly factor                                    | COG4775 | M | 100.00 | 92.25  |
| RCA23_c15240 | putative outer tein                                                        |         |   | 70.97  | 100.00 |
| RCA23_c15250 | (3R)-hydroxymyristoyl-[acyl-carrier-protein] dehydratase FabZ              | COG0764 | I | 0.00   | 100.00 |
| RCA23_c15260 | acyl-[acyl-carrier-protein]-UDP-N-acetylglucosamine O-acyltransferase LpxA | COG1043 | M | 83.33  | 100.00 |
| RCA23_c15270 | hypothetical protein DUF1009                                               | COG3494 | S | 100.00 | 94.03  |
| RCA23_c15280 | lipid-A-disaccharide synthase LpxB                                         | COG0763 | M | 100.00 | 100.00 |
| RCA23_c15290 | tRNA (5-methylaminomethyl-2-thiouridylate)-methyltransferase TrmU          | COG0482 | J | 85.49  | 99.56  |
| RCA23_c15300 | hypothetical protein                                                       |         |   | 100.00 | 92.98  |
| RCA23_c15310 | cell cycle transcriptional regulator                                       | COG0745 | T | 77.73  | 100.00 |
| RCA23_c15320 | DNA ligase LigA                                                            | COG0272 | L | 100.00 | 89.77  |
| RCA23_c15330 | ATP-dependent DNA helicase RecG                                            | COG1200 | L | 98.76  | 100.00 |
| RCA23_c15340 | hypothetical protein                                                       |         |   | 100.00 | 100.00 |
| RCA23_c15350 | hypothetical protein                                                       | COG0822 | C | 100.00 | 100.00 |
| RCA23_c15360 | phosphoribosyl-AMP cyclohydrolase HisI                                     | COG0139 | E | 100.00 | 100.00 |

|              |                                                                 |         |   |        |        |
|--------------|-----------------------------------------------------------------|---------|---|--------|--------|
| RCA23_c15370 | glutamyl-Q tRNA(Asp) synthase GluQ                              | COG0008 | J | 86.90  | 100.00 |
| RCA23_c15380 | hypothetical protein, methyltransferase                         | COG4976 | R | 100.00 | 100.00 |
| RCA23_c15390 | tRNA uridine 5-carboxymethylaminomethyl modification enzyme Gid | COG1206 | J | 100.00 | 96.56  |
| RCA23_c15400 | putative crotonase                                              | COG1024 | I | 100.00 | 94.04  |
| RCA23_c15410 | putative thioesterase                                           | COG2050 | Q | 69.98  | 100.00 |
| RCA23_c15420 | 50S ribosomal protein L13                                       | COG0102 | J | 0.00   | 100.00 |
| RCA23_c15430 | 30S ribosomal protein S9                                        | COG0103 | J | 0.00   | 100.00 |
| RCA23_c15440 | integrase                                                       |         |   | 0.00   | 64.64  |
| RCA23_c15460 | choline dehydrogenase BetA                                      | COG2303 | E | 100.00 | 89.43  |
| RCA23_c15470 | ABC transporter, permease protein                               | COG4662 | H | 100.00 | 100.00 |
| RCA23_c15480 | ABC transporter, ATP-binding protein                            | COG1131 | V | 100.00 | 100.00 |
| RCA23_c15490 | ABC transporter, periplasmic substrate-binding protein          | COG2998 | H | 100.00 | 100.00 |
| RCA23_c15500 | hypothetical membrane protein                                   | COG1238 | S | 100.00 | 100.00 |
| RCA23_c15510 | hypothetical protein DUF6 family, transmembrane                 | COG2962 | R | 100.00 | 100.00 |
| RCA23_c15520 | hypothetical protein                                            | COG2068 | R | 100.00 | 94.33  |
| RCA23_c15530 | dimethylglycine dehydrogenase                                   | COG0404 | E | 100.00 | 95.19  |
| RCA23_c15540 | dimethylglycine dehydrogenase                                   | COG0404 | E | 100.00 | 98.03  |
| RCA23_c15550 | short-chain dehydrogenase/reductase SDR                         | COG1028 | I | 100.00 | 100.00 |
| RCA23_c15560 | hypothetical transmembrane protein                              | COG3788 | R | 100.00 | 100.00 |
| RCA23_c15570 | hypothetical protein, tetR regulator                            | COG1309 | K | 100.00 | 100.00 |
| RCA23_c15580 | homoserine O-succinyltransferase MetA                           | COG1897 | E | 100.00 | 100.00 |
| RCA23_c15590 | hypothetical protein                                            |         |   | 100.00 | 100.00 |
| RCA23_c15600 | putative integral membrane protein                              | COG2510 | S | 60.07  | 100.00 |
| RCA23_c15610 | Gcn5-like N-acetyltransferase                                   | COG1670 | J | 100.00 | 84.62  |
| RCA23_c15620 | GMP synthase GuaA                                               | COG0519 | F | 100.00 | 100.00 |
| RCA23_c15630 | trimethylamine methyltransferase MttB                           | COG5598 | H | 100.00 | 100.00 |
| RCA23_c15640 | hypothetical protein                                            |         |   | 100.00 | 100.00 |
| RCA23_c15650 | lipoyl synthase LipA                                            | COG0320 | H | 100.00 | 100.00 |
| RCA23_c15660 | hypothetical protein                                            |         |   | 100.00 | 100.00 |
| RCA23_c15670 | hypoxanthine phosphoribosyltransferase Hpt                      | COG0634 | F | 100.00 | 100.00 |
| RCA23_c15680 | hypothetical protein                                            | COG2867 | I | 100.00 | 100.00 |
| RCA23_c15690 | ammonium transporter AmtB                                       | COG0004 | P | 100.00 | 100.00 |
| RCA23_c15700 | putative competence-damaged protein                             | COG1546 | R | 100.00 | 100.00 |



|              |                                                            |         |   |        |        |
|--------------|------------------------------------------------------------|---------|---|--------|--------|
| RCA23_c15710 | phosphatidylglycerophosphatase A                           | COG1267 | I | 100.00 | 100.00 |
| RCA23_c15720 | 2-C-methyl-D-erythritol 2,4-cyclodiphosphate synthase IspF | COG0245 | I | 100.00 | 97.73  |
| RCA23_c15730 | tRNA-dihydrouridine synthase B                             | COG0042 | J | 100.00 | 95.22  |
| RCA23_c15740 | histidine kinase, nitrogen regulation protein NtrB         | COG3852 | T | 100.00 | 100.00 |
| RCA23_c15750 | nitrogen regulation protein NtrC                           | COG2204 | T | 100.00 | 100.00 |
| RCA23_c15760 | histidine kinase, nitrogen regulation protein NtrY         | COG5000 | T | 100.00 | 97.57  |
| RCA23_c15770 | nitrogen assimilation regulatory protein NtrX              | COG2204 | T | 100.00 | 100.00 |
| RCA23_c15780 | Trk system potassium uptake protein TrkA                   | COG0569 | P | 100.00 | 96.80  |
| RCA23_c15790 | putative Trk system potassium uptake protein trkH          | COG0168 | P | 100.00 | 99.73  |
| RCA23_c15800 | RNA-binding protein Hfq                                    | COG1923 | R | 100.00 | 100.00 |
| RCA23_c15810 | GTP-binding protein HflX                                   | COG2262 | R | 100.00 | 100.00 |
| RCA23_c15820 | acyl-homoserine lactone acylase QuiP                       | COG2366 | R | 100.00 | 96.81  |
| RCA23_c15830 | hypothetical protein                                       | COG2930 | S | 100.00 | 93.91  |
| RCA23_c15840 | delta-aminolevulinic acid dehydratase HemB                 | COG0113 | H | 100.00 | 91.89  |
| RCA23_c15850 | hypothetical protein                                       |         |   | 100.00 | 100.00 |
| RCA23_c15860 | transcription-repair-coupling factor Mfd                   | COG1197 | L | 100.00 | 98.08  |
| RCA23_c15870 | putative DSBA-like thioredoxin family protein              | COG2761 | Q | 100.00 | 66.67  |
| RCA23_c15880 | long-chain-fatty-acid-CoA ligase                           | COG0318 | I | 100.00 | 94.05  |
| RCA23_c15890 | HTH-type transcriptional regulator                         | COG1396 | K | 100.00 | 100.00 |
| RCA23_c15900 | aquaporin AqpZ                                             | COG0580 | G | 100.00 | 100.00 |
| RCA23_c15910 | putative extracellular solute-binding protein              | COG4166 | E | 100.00 | 100.00 |
| RCA23_c15920 | lysine exporter protein LysE                               | COG1279 | R | 100.00 | 100.00 |
| RCA23_c15930 | hypothetical protein DUF502                                | COG2928 | S | 100.00 | 99.43  |
| RCA23_c15940 | pseudouridine-5'-phosphate glycosidase PsuG                | COG2313 | Q | 100.00 | 100.00 |
| RCA23_c15950 | hypothetical protein, pfkB family carbohydrate kinase      | COG0524 | G | 100.00 | 100.00 |
| RCA23_c15960 | cold shock protein CspA                                    | COG1278 | K | 100.00 | 100.00 |
| RCA23_c15970 | 30S ribosomal protein S2                                   | COG0052 | J | 100.00 | 100.00 |
| RCA23_c15980 | elongation factor Ts                                       | COG0264 | J | 79.68  | 100.00 |
| RCA23_c15990 | hypothetical protein                                       |         |   | 95.07  | 79.32  |
| RCA23_c16000 | hypothetical protein, acetyltransferase-like               | COG1670 | J | 100.00 | 48.43  |
| RCA23_c16010 | hypothetical protein, transcription factor NusA like       |         |   | 59.81  | 73.52  |
| RCA23_c16020 | putative phenylacetic acid degradation protein             | COG0663 | R | 0.00   | 100.00 |
| RCA23_c16030 | guanylate kinase Gmk                                       | COG0194 | F | 91.12  | 83.02  |

|              |                                                                      |         |   |        |        |
|--------------|----------------------------------------------------------------------|---------|---|--------|--------|
| RCA23_c16040 | hypothetical protein, YicC-like                                      | COG1561 | S | 100.00 | 100.00 |
| RCA23_c16050 | hypothetical protein, DUF1457                                        | COG5388 | S | 100.00 | 97.93  |
| RCA23_c16060 | phospho-2-dehydro-3-deoxyheptonate aldolase                          | COG3200 | E | 100.00 | 98.91  |
| RCA23_c16070 | putative HTH-type transcriptional regulator, AraC family             | COG4977 | K | 100.00 | 98.52  |
| RCA23_c16080 | putative amino-acid binding protein                                  | COG0683 | E | 100.00 | 80.88  |
| RCA23_c16090 | putative branched-chain amino acid transport ATP-binding protein     | COG0411 | E | 84.49  | 93.46  |
| RCA23_c16100 | putative branched-chain amino acid transport ATP-binding protein     | COG0410 | E | 100.00 | 79.13  |
| RCA23_c16110 | putative branched-chain amino acid transport system permease protein | COG0559 | E | 100.00 | 82.35  |
| RCA23_c16120 | putative branched-chain amino acid transport system permease protein | COG4177 | E | 100.00 | 97.53  |
| RCA23_c16130 | GTP-binding protein TypA                                             | COG1217 | T | 91.58  | 100.00 |
| RCA23_c16140 | hypothetical protein DUF1330                                         | COG5470 | S | 100.00 | 65.29  |
| RCA23_c16150 | alanyl-tRNA synthase AlaS                                            | COG0013 | J | 77.92  | 100.00 |
| RCA23_c16160 | protein RecA                                                         | COG0468 | L | 100.00 | 91.02  |
| RCA23_c16170 | hypothetical protein                                                 |         |   | 100.00 | 100.00 |
| RCA23_c16180 | sensor transduction histidine kinase                                 | COG0642 | T | 71.23  | 100.00 |
| RCA23_c16190 | hypothetical protein                                                 |         |   | 40.23  | 92.64  |
| RCA23_c16200 | hypothetical protein, NOL1/NOP2/sun family                           | COG0144 | J | 100.00 | 89.03  |
| RCA23_c16210 | inosine-5'-monophosphate dehydrogenase GuaB                          | COG0516 | F | 100.00 | 100.00 |
| RCA23_c16220 | hypothetical protein                                                 | COG3894 | R | 100.00 | 92.60  |
| RCA23_c16240 | cysteine desulfurase SufS                                            | COG0520 | E | 100.00 | 100.00 |
| RCA23_c16250 | hypothetical protein                                                 |         |   | 100.00 | 100.00 |
| RCA23_c16260 | hypothetical protein                                                 |         |   | 100.00 | 95.60  |
| RCA23_c16270 | FeS assembly protein SufD                                            | COG0719 | O | 100.00 | 100.00 |
| RCA23_c16280 | FeS assembly ATPase SufC                                             | COG0396 | O | 100.00 | 100.00 |
| RCA23_c16290 | FeS assembly protein SufB                                            | COG0719 | O | 59.19  | 100.00 |
| RCA23_c16300 | putative cysteine desulfurase                                        | COG1104 | E | 100.00 | 100.00 |
| RCA23_c16310 | HTH-type transcriptional regulator Rrf2                              | COG1959 | K | 100.00 | 100.00 |
| RCA23_c16320 | hypothetical protein                                                 | COG2945 | R | 100.00 | 100.00 |
| RCA23_c16330 | putative oxidoreductase                                              | COG0673 | R | 100.00 | 100.00 |
| RCA23_c16340 | inosose dehydratase IolE                                             | COG1082 | G | 100.00 | 100.00 |
| RCA23_c16350 | putative oxidoreductase                                              | COG0673 | R | 100.00 | 100.00 |
| RCA23_c16360 | HTH-type transcriptional repressor, LacI family                      | COG1609 | K | 100.00 | 100.00 |
| RCA23_c16370 | hypothetical protein                                                 |         |   | 100.00 | 100.00 |

|              |                                                            |         |   |        |        |
|--------------|------------------------------------------------------------|---------|---|--------|--------|
| RCA23_c16380 | sugar (ribose) ABC-transport system ATP binding protein    | COG1129 | G | 100.00 | 100.00 |
| RCA23_c16390 | sugar (ribose) ABC transporter permease protein            | COG1172 | G | 100.00 | 99.35  |
| RCA23_c16400 | sugar (ribose) ABC transporter periplasmic binding protein | COG1879 | G | 100.00 | 100.00 |
| RCA23_c16410 | beta-glucosidase BglA                                      | COG2723 | G | 100.00 | 84.77  |
| RCA23_c16420 | maltose/maltodextrin import ATP-binding protein Malk       | COG3839 | G | 100.00 | 100.00 |
| RCA23_c16430 | putative alpha-glucosidase AglA                            | COG0366 | G | 100.00 | 100.00 |
| RCA23_c16440 | alpha-glucoside transport system permease protein AglG     | COG0395 | G | 100.00 | 100.00 |
| RCA23_c16450 | ABC transporter, membrane spanning protein                 | COG0395 | G | 100.00 | 100.00 |
| RCA23_c16460 | alpha-glucoside transport system permease protein AglF     | COG1175 | G | 100.00 | 96.57  |
| RCA23_c16470 | alpha-glucosides-binding periplasmic protein AglE          | COG1653 | G | 100.00 | 98.21  |
| RCA23_c16480 | HTH-type transcriptional regulator                         | COG1609 | K | 100.00 | 100.00 |
| RCA23_c16490 | oxidoreductase                                             | COG4989 | R | 100.00 | 100.00 |
| RCA23_c16500 | alkanesulfonate monooxygenase SsuD                         | COG2141 | C | 100.00 | 87.13  |
| RCA23_c16510 | putative regulatory DNA binding protein                    | COG2188 | K | 100.00 | 94.56  |
| RCA23_c16520 | putative oxidoreductase                                    | COG0673 | R | 100.00 | 100.00 |
| RCA23_c16530 | glucose-6-phosphate isomerase Pgi                          | COG0166 | G | 100.00 | 100.00 |
| RCA23_c16540 | 6-phosphogluconolactonase Pgl                              | COG0363 | G | 100.00 | 100.00 |
| RCA23_c16550 | glucose-6-phosphate 1-dehydrogenase Zwf                    | COG0364 | G | 74.66  | 88.29  |
| RCA23_c16560 | hypothetical protein, radical SAM                          | COG0535 | R | 100.00 | 100.00 |
| RCA23_c16570 | putative 5-methylcytosine-specific restriction enzyme McrA | COG1403 | V | 100.00 | 100.00 |
| RCA23_c16580 | putative phospholipase/carboxylesterase                    | COG0400 | R | 94.37  | 98.52  |
| RCA23_c16590 | HhH-GPD superfamily base excision DNA repair protein       | COG0122 | L | 98.24  | 100.00 |
| RCA23_c16600 | precorrin-6A reductase CobK                                | COG2099 | H | 100.00 | 97.68  |
| RCA23_c16610 | cobalamin (vitamin B12) biosynthesis CbiDprotein CbiD      | COG1903 | H | 100.00 | 49.41  |
| RCA23_c16620 | uroporphyrinogen-III C-methyltransferase CobA              | COG0007 | H | 100.00 | 100.00 |
| RCA23_c16630 | cobyrinic acid A,C-diamide synthase CobB                   | COG1797 | H | 100.00 | 100.00 |
| RCA23_c16640 | putative major facilitator superfamily transporter         |         |   | 100.00 | 95.59  |
| RCA23_c16650 | hypothetical protein                                       | COG1562 | I | 100.00 | 100.00 |
| RCA23_c16660 | cysteinyl-tRNA synthase CysS                               | COG0215 | J | 100.00 | 100.00 |
| RCA23_c16670 | aspartate aminotransferase AspC                            | COG0436 | E | 100.00 | 100.00 |
| RCA23_c16680 | trimethylamine methyltransferase MttB                      | COG5598 | H | 100.00 | 100.00 |
| RCA23_c16690 | ABC transporter ATP-binding protein Uup                    | COG0488 | R | 97.63  | 100.00 |
| RCA23_c16700 | hypothetical protein                                       | COG3176 | R | 100.00 | 85.60  |

|              |                                                                 |         |   |        |        |
|--------------|-----------------------------------------------------------------|---------|---|--------|--------|
| RCA23_c16710 | peptide methionine sulfoxide reductase MsrB                     | COG0229 | O | 100.00 | 89.22  |
| RCA23_c16720 | hypothetical protein, lipoprotein                               | COG2913 | J | 100.00 | 81.38  |
| RCA23_c16730 | hypothetical protein                                            | COG1399 | R | 100.00 | 100.00 |
| RCA23_c16740 | fatty acid/phospholipid synthesis protein PlsX                  | COG0416 | I | 100.00 | 100.00 |
| RCA23_c16750 | 3-oxoacyl-[acyl-carrier-protein] synthase FabH                  | COG0332 | I | 100.00 | 100.00 |
| RCA23_c16760 | integration host factor alpha subunit IhfA                      | COG0776 | L | 100.00 | 100.00 |
| RCA23_c16770 | hypothetical protein, MerR family regulatory protein            | COG0789 | K | 100.00 | 95.91  |
| RCA23_c16790 | deoxyguanosinetriphosphate triphosphohydrolase-like protein Dcd | COG0717 | F | 88.73  | 100.00 |
| RCA23_c16800 | putative segregation and condensation protein B                 | COG1386 | K | 3.74   | 100.00 |
| RCA23_c16810 | hypothetical protein, segregation and condensation protein A    | COG1354 | S | 100.00 | 84.61  |
| RCA23_c16820 | beta-hexosaminidase NagZ                                        | COG1472 | G | 100.00 | 100.00 |
| RCA23_c16830 | hypothetical protein                                            |         |   | 100.00 | 100.00 |
| RCA23_c16840 | arginyl-tRNA synthase                                           | COG0018 | J | 100.00 | 100.00 |
| RCA23_c16850 | deoxyguanosinetriphosphate triphosphohydrolase-like protein     | COG0232 | F | 100.00 | 100.00 |
| RCA23_c16860 | putative iron-sulfur insertion protein erpA                     | COG0316 | S | 100.00 | 95.41  |
| RCA23_c16870 | exodeoxyribonuclease III                                        | COG0708 | L | 57.16  | 93.92  |
| RCA23_c16880 | putative cytochrome B561                                        | COG3038 | C | 100.00 | 99.14  |
| RCA23_c16890 | putative dnaK suppressor protein dksA                           | COG1734 | T | 100.00 | 63.36  |
| RCA23_c16900 | hypothetical protein                                            | COG0714 | R | 100.00 | 100.00 |
| RCA23_c16910 | hypothetical protein                                            | COG3825 | S | 100.00 | 98.90  |
| RCA23_c16920 | putative peptidase, M48 family                                  | COG0501 | O | 100.00 | 78.99  |
| RCA23_c16930 | hypothetical protein                                            |         |   | 100.00 | 100.00 |
| RCA23_c16940 | putative ribosomal RNA large subunit methyltransferase          | COG1092 | R | 100.00 | 97.33  |
| RCA23_c16950 | phosphogluconate dehydratase Edd                                | COG0129 | E | 100.00 | 100.00 |
| RCA23_c16960 | KHG/KDPG aldolase Eda                                           | COG0800 | G | 100.00 | 100.00 |
| RCA23_c16970 | hypothetical protein                                            |         |   | 100.00 | 100.00 |
| RCA23_c16980 | glutamate-ammonia-ligase adenylyltransferase GlnE               | COG1391 | O | 100.00 | 100.00 |
| RCA23_c16990 | hypothetical protein                                            | COG2606 | S | 100.00 | 100.00 |
| RCA23_c17000 | hypothetical protein                                            |         |   | 100.00 | 100.00 |
| RCA23_c17010 | hypothetical protein                                            |         |   | 100.00 | 92.89  |
| RCA23_c17020 | hypothetical protein                                            |         |   | 100.00 | 92.34  |
| RCA23_c17030 | putative aromatic-ring-hydroxylating dioxygenase                | COG4638 | P | 77.49  | 100.00 |
| RCA23_c17040 | putative acetolactate synthase small subunit IlvH               | COG0440 | E | 100.00 | 100.00 |

|              |                                                     |         |   |        |        |
|--------------|-----------------------------------------------------|---------|---|--------|--------|
| RCA23_c17050 | acetolactate synthase isozyme large subunit IlvI    | COG0028 | E | 100.00 | 92.98  |
| RCA23_c17060 | hypothetical membrane protein, porin-like           |         |   | 100.00 | 100.00 |
| RCA23_c17070 | TRAP dicarboxylate transporter, subunit DctP        | COG4663 | Q | 100.00 | 94.50  |
| RCA23_c17080 | TRAP dicarboxylate transporter, subunit DctQ        | COG4665 | Q | 100.00 | 84.97  |
| RCA23_c17090 | TRAP dicarboxylate transporter, subunit DctM        | COG4664 | Q | 100.00 | 100.00 |
| RCA23_c17100 | putative arginyl-tRNA--protein transferase Ate      | COG2935 | O | 100.00 | 97.45  |
| RCA23_c17110 | vitamin B12-dependent ribonucleotide reductase NrdJ | COG0209 | F | 95.29  | 97.51  |
| RCA23_c17120 | hypothetical protein                                |         |   | 100.00 | 100.00 |
| RCA23_c17140 | hypothetical protein DUF192                         | COG1430 | S | 100.00 | 100.00 |
| RCA23_c17150 | cold shock protein                                  | COG1278 | K | 100.00 | 100.00 |
| RCA23_c17160 | pyridoxine/pyridoxamine 5'-phosphate oxidase PdxH   | COG0259 | H | 100.00 | 100.00 |
| RCA23_c17170 | enoyl-[acyl-carrier-protein] reductase FabI         | COG0623 | I | 100.00 | 99.11  |
| RCA23_c17180 | xanthine phosphoribosyltransferase Gpt              | COG0503 | F | 100.00 | 100.00 |
| RCA23_c17190 | pyrimidine-specific ribonucleoside hydrolase RihA   | COG1957 | F | 100.00 | 88.35  |
| RCA23_c17200 | hypothetical protein UPF0061                        | COG0397 | S | 100.00 | 100.00 |
| RCA23_c17210 | putative sodium/hydrogen exchanger                  | COG0025 | P | 100.00 | 100.00 |
| RCA23_c17220 | ferric uptake regulator protein Fur                 | COG0735 | P | 100.00 | 100.00 |
| RCA23_c17230 | putative S-adenosylmethionine uptake transporter    | COG0697 | G | 100.00 | 94.63  |
| RCA23_c17240 | enolase Eno                                         | COG0148 | G | 100.00 | 100.00 |
| RCA23_c17250 | anhydro-N-acetylmuramic acid kinase AnmK            | COG2377 | O | 100.00 | 100.00 |
| RCA23_c17260 | tyrosyl-tRNA synthase TyrS                          | COG0162 | J | 100.00 | 100.00 |
| RCA23_c17270 | aspartate aminotransferase AspC                     | COG0436 | E | 100.00 | 95.63  |
| RCA23_c17280 | hypothetical protein                                | COG0760 | O | 100.00 | 99.35  |
| RCA23_c17290 | anthranilate synthase component TrpE                | COG0147 | E | 100.00 | 99.74  |
| RCA23_c17300 | protein soxG                                        | COG0491 | R | 100.00 | 100.00 |
| RCA23_c17310 | protein soxH                                        | COG0491 | R | 100.00 | 96.72  |
| RCA23_c17320 | 5-aminolevulinate synthase HemaA                    | COG0156 | H | 100.00 | 72.73  |
| RCA23_c17330 | sulfide dehydrogenase flavoprotein chain SoxF       | COG3439 | S | 100.00 | 100.00 |
| RCA23_c17340 | domain of unknown function DUF1791                  | COG1416 | S | 100.00 | 100.00 |
| RCA23_c17350 | sulfite oxidase cytochrome subunit SoxD             | COG3474 | C | 100.00 | 100.00 |
| RCA23_c17360 | sulfite oxidase molybdopterin subunit SoxC          | COG2041 | R | 100.00 | 100.00 |
| RCA23_c17370 | sulfur oxidation protein SoxB                       | COG0737 | F | 100.00 | 82.16  |
| RCA23_c17380 | diheme cytochrome c                                 | COG3258 | C | 100.00 | 100.00 |

|              |                                                 |         |   |        |        |
|--------------|-------------------------------------------------|---------|---|--------|--------|
| RCA23_c17390 | protein SoxZ                                    |         |   | 100.00 | 89.09  |
| RCA23_c17400 | protein SoxY                                    | COG5501 | S | 100.00 | 81.32  |
| RCA23_c17410 | cytochrome c                                    | COG2010 | C | 100.00 | 64.22  |
| RCA23_c17420 | thioredoxin SoxW                                | COG2143 | O | 100.00 | 71.86  |
| RCA23_c17430 | cytochrome c-type biogenesis protein SoxV       | COG0785 | O | 100.00 | 100.00 |
| RCA23_c17440 | protein SoxS                                    |         |   | 100.00 | 100.00 |
| RCA23_c17450 | HTH-type transcriptional regulator, ArsR family | COG0640 | K | 100.00 | 100.00 |
| RCA23_c17460 | putative soxT, transmembrane protein DUF395     | COG2391 | R | 100.00 | 100.00 |
| RCA23_c17470 | hypothetical protein DUF395                     | COG2391 | R | 100.00 | 100.00 |
| RCA23_c17480 | NAD-binding protein                             | COG2084 | I | 100.00 | 100.00 |
| RCA23_c17490 | glyoxylate reductase GyaR                       | COG1052 | C | 100.00 | 96.82  |
| RCA23_c17500 | glutamyl-tRNA(Gln) amidotransferase subunit A   | COG0154 | J | 100.00 | 99.25  |
| RCA23_c17510 | TRAP dicarboxylate transporter, subunit DctM    | COG4664 | Q | 100.00 | 96.38  |
| RCA23_c17520 | TRAP dicarboxylate transporter, subunit DctQ    | COG4665 | Q | 100.00 | 100.00 |
| RCA23_c17530 | TRAP dicarboxylate transporter, subunit DctP    | COG4663 | Q | 100.00 | 100.00 |
| RCA23_c17540 | hypothetical protein                            |         |   | 100.00 | 100.00 |
| RCA23_c17550 | glycerol kinase GlpK                            | COG0554 | C | 100.00 | 100.00 |
| RCA23_c17560 | ribosomal RNA large subunit methyltransferase J | COG0293 | J | 100.00 | 100.00 |
| RCA23_c17570 | putative Ppx/GppA phosphatase family protein    | COG0248 | F | 100.00 | 99.73  |
| RCA23_c17580 | hypothetical protein                            |         |   | 100.00 | 100.00 |
| RCA23_c17590 | hypothetical protein                            | COG0685 | E | 100.00 | 100.00 |
| RCA23_c17600 | pterin domain containing enzyme                 | COG1410 | E | 100.00 | 97.75  |
| RCA23_c17610 | HpcH/Hpal aldolase family protein               | COG3836 | G | 100.00 | 100.00 |
| RCA23_c17620 | glucokinase Glk                                 | COG0837 | G | 100.00 | 100.00 |
| RCA23_c17630 | hypothetical protein DUF1006                    | COG3214 | S | 100.00 | 100.00 |
| RCA23_c17640 | reductive dehalogenase                          | COG1018 | C | 100.00 | 95.60  |
| RCA23_c17650 | hypothetical protein, XdhC and CoxI             | COG1975 | O | 100.00 | 100.00 |
| RCA23_c17660 | 2-hydroxy-3-oxopropionate reductase GlxR        | COG2084 | I | 100.00 | 90.68  |
| RCA23_c17670 | 3-hydroxybutyrate dehydrogenase                 | COG1028 | I | 100.00 | 97.71  |
| RCA23_c17680 | dihydroxy-acid dehydratase IlvD                 | COG0129 | E | 100.00 | 99.22  |
| RCA23_c17690 | fumarylacetoacetate hydrolase                   | COG0179 | Q | 100.00 | 100.00 |
| RCA23_c17700 | hypothetical protein                            |         |   | 100.00 | 100.00 |
| RCA23_c17710 | nucleoside diphosphate kinase Ndk               | COG0105 | F | 100.00 | 100.00 |

|              |                                                        |         |   |        |        |
|--------------|--------------------------------------------------------|---------|---|--------|--------|
| RCA23_c17720 | hypothetical protein                                   |         |   | 59.55  | 55.34  |
| RCA23_c17730 | ABC transporter ATP-binding protein                    | COG0488 | R | 100.00 | 96.25  |
| RCA23_c17740 | MarC family integral membrane protein                  | COG2095 | U | 100.00 | 100.00 |
| RCA23_c17750 | hypothetical protein                                   | COG3577 | R | 100.00 | 92.48  |
| RCA23_c17760 | putative DNA polymerase III chi subunit, HolC          | COG2927 | L | 100.00 | 100.00 |
| RCA23_c17770 | cytosol aminopeptidase PepA                            | COG0260 | E | 100.00 | 100.00 |
| RCA23_c17780 | putative permease, YjgP/YjgQ family                    | COG0795 | R | 100.00 | 100.00 |
| RCA23_c17790 | putative permease, YjgP/YjgQ family                    | COG0795 | R | 100.00 | 100.00 |
| RCA23_c17800 | putative organic solvent tolerance protein             | COG1452 | M | 91.88  | 100.00 |
| RCA23_c17810 | hypothetical protein, SurA                             | COG0760 | O | 100.00 | 92.83  |
| RCA23_c17820 | 4-hydroxythreonine-4-phosphate dehydrogenase PdxA      | COG1995 | H | 100.00 | 100.00 |
| RCA23_c17830 | dimethyladenosine transferase KsgA                     | COG0030 | J | 100.00 | 100.00 |
| RCA23_c17840 | hypothetical protein                                   |         |   | 100.00 | 100.00 |
| RCA23_c17850 | modification methylase, hemK family                    | COG2890 | J | 100.00 | 100.00 |
| RCA23_c17860 | peptide chain release factor 1                         | COG0216 | J | 100.00 | 100.00 |
| RCA23_c17870 | hypothetical protein                                   | COG4446 | S | 100.00 | 100.00 |
| RCA23_c17880 | agmatinase SpeB                                        | COG0010 | E | 100.00 | 100.00 |
| RCA23_c17890 | alpha/beta hydrolase                                   |         |   | 100.00 | 86.08  |
| RCA23_c17900 | agmatinase SpeB                                        | COG0010 | E | 100.00 | 100.00 |
| RCA23_c17910 | hippurate hydrolase HipO                               | COG1473 | R | 100.00 | 100.00 |
| RCA23_c17920 | protein MazG                                           | COG3956 | R | 100.00 | 96.06  |
| RCA23_c17930 | ABC transporter periplasmic iron-binding protein FutA  | COG1840 | P | 93.77  | 95.75  |
| RCA23_c17940 | putative peptidyl-prolyl cis-trans isomerase Ppi       | COG0652 | O | 100.00 | 78.69  |
| RCA23_c17950 | putative peptidyl-prolyl cis-trans isomerase Ppi       | COG0652 | O | 100.00 | 100.00 |
| RCA23_c17960 | phosphoglycerate kinase Pgk                            | COG0126 | G | 100.00 | 100.00 |
| RCA23_c17970 | fructose-bisphosphate aldolase class 1                 | COG3588 | G | 100.00 | 100.00 |
| RCA23_c17980 | hypothetical protein, septum formation initiator       | COG2919 | D | 100.00 | 100.00 |
| RCA23_c17990 | pyruvate dehydrogenase E1 component alpha subunit PdhA | COG1071 | C | 100.00 | 100.00 |
| RCA23_c18000 | pyruvate dehydrogenase E1 component beta subunit PdhB  | COG0022 | C | 100.00 | 100.00 |
| RCA23_c18010 | dihydrolipoyllysine-residue acetyltransferase PdhC     | COG0508 | C | 100.00 | 100.00 |
| RCA23_c18020 | serine acetyltransferase CysE                          | COG1045 | E | 100.00 | 97.37  |
| RCA23_c18030 | putative gene transfer agent protein                   |         |   | 50.04  | 58.62  |
| RCA23_c18040 | putative gene transfer agent large terminase part 1    | COG5323 | S | 10.00  | 3.73   |



|              |                                                         |         |   |        |        |
|--------------|---------------------------------------------------------|---------|---|--------|--------|
| RCA23_c18050 | putative gene transfer agent large terminase part 2     | COG5323 | S | 100.00 | 71.38  |
| RCA23_c18060 | aminodeoxychorismate lyase                              | COG1559 | R | 100.00 | 100.00 |
| RCA23_c18070 | 3-oxoacyl-[acyl-carrier-protein] synthase FabF          | COG0304 | I | 100.00 | 100.00 |
| RCA23_c18080 | acyl carrier protein AcpP                               | COG0236 | I | 100.00 | 100.00 |
| RCA23_c18090 | 3-oxoacyl-[acyl-carrier-protein] reductase FabG         | COG1028 | I | 100.00 | 100.00 |
| RCA23_c18100 | malonyl CoA-acyl carrier protein transacylase           | COG0331 | I | 100.00 | 100.00 |
| RCA23_c18110 | 30S ribosomal protein S6                                | COG0360 | J | 100.00 | 94.81  |
| RCA23_c18120 | 30S ribosomal protein S18                               | COG0238 | J | 100.00 | 100.00 |
| RCA23_c18130 | 50S ribosomal protein L9                                | COG0359 | J | 100.00 | 100.00 |
| RCA23_c18140 | trigger factor (TF)                                     | COG0544 | O | 100.00 | 100.00 |
| RCA23_c18160 | nitrogen regulatory protein P-II 1                      | COG0347 | E | 100.00 | 95.87  |
| RCA23_c18170 | glutamine synthase GlnA type I                          | COG0174 | E | 100.00 | 99.15  |
| RCA23_c18190 | hypothetical protein                                    |         |   | 100.00 | 100.00 |
| RCA23_c18180 | dimethylpropiothetin dethiomethylase DddP               | COG0006 | E | 100.00 | 97.95  |
| RCA23_c18200 | Biotin transporter BioY                                 | COG1268 | R | 100.00 | 87.00  |
| RCA23_c18210 | hypothetical protein                                    |         |   | 100.00 | 100.00 |
| RCA23_c18220 | adenylosuccinate lyase PurB                             | COG0015 | F | 100.00 | 100.00 |
| RCA23_c18230 | putative nitrile hydratase, beta subunit                |         |   | 100.00 | 100.00 |
| RCA23_c18240 | hypothetical protein                                    |         |   | 100.00 | 100.00 |
| RCA23_c18250 | nitrile hydratase alpha subunit NthA                    |         |   | 100.00 | 100.00 |
| RCA23_c18260 | hypothetical protein DUF6 transmembrane                 | COG0697 | G | 100.00 | 100.00 |
| RCA23_c18270 | putative lipid A biosynthesis lauroyl acyltransferase   | COG1560 | M | 100.00 | 100.00 |
| RCA23_c18280 | hypothetical protein                                    | COG5429 | S | 100.00 | 100.00 |
| RCA23_c18290 | aconitate hydratase AcnA                                | COG1048 | C | 100.00 | 99.93  |
| RCA23_c18300 | cytochrome c biogenesis protein CcmG                    | COG0526 | O | 100.00 | 100.00 |
| RCA23_c18310 | cytochrome c-type biogenesis protein CcmC               | COG0755 | O | 100.00 | 100.00 |
| RCA23_c18320 | cytochrome c-type biogenesis protein CcmB               | COG2386 | O | 100.00 | 100.00 |
| RCA23_c18330 | cytochrome c biogenesis ATP-binding export protein CcmA | COG4133 | O | 100.00 | 100.00 |
| RCA23_c18340 | hypothetical protein                                    | COG3737 | S | 100.00 | 100.00 |
| RCA23_c18350 | protein export membrane protein SecF                    | COG0341 | U | 100.00 | 100.00 |
| RCA23_c18360 | protein export membrane protein SecD                    | COG0342 | U | 100.00 | 96.14  |
| RCA23_c18370 | putative immunogenic membrane protein YajC              | COG1862 | U | 100.00 | 100.00 |
| RCA23_c18380 | seryl-tRNA synthase SerS                                | COG0172 | J | 100.00 | 99.15  |

|              |                                                                 |         |   |        |        |
|--------------|-----------------------------------------------------------------|---------|---|--------|--------|
| RCA23_c18390 | hypothetical protein, alpha/beta hydrolase-like                 | COG2267 | I | 0.00   | 86.50  |
| RCA23_c18400 | GTP-binding protein EngA                                        | COG1160 | R | 100.00 | 100.00 |
| RCA23_c18410 | putative quinoprotein                                           | COG1520 | S | 100.00 | 100.00 |
| RCA23_c18420 | hypothetical protein DUF2133                                    | COG4649 | S | 100.00 | 100.00 |
| RCA23_c18430 | RND efflux transporter, MFP subunit                             | COG0845 | M | 100.00 | 100.00 |
| RCA23_c18440 | RND efflux transporter, permease protein                        | COG0841 | V | 100.00 | 98.65  |
| RCA23_c18450 | ABC transporter ATP-binding protein                             | COG5265 | O | 100.00 | 97.90  |
| RCA23_c18460 | hypothetical protein, peptidoglycan-binding protein domain LysM | COG1652 | S | 100.00 | 100.00 |
| RCA23_c18470 | protein RarD                                                    | COG2962 | R | 100.00 | 100.00 |
| RCA23_c18480 | superoxide dismutase SodB                                       | COG0605 | P | 100.00 | 100.00 |
| RCA23_c18490 | sarcosine oxidase subunit SoxG                                  | COG4583 | E | 100.00 | 100.00 |
| RCA23_c18500 | sarcosine oxidase alpha subunit SoxA                            | COG0404 | E | 100.00 | 91.87  |
| RCA23_c18510 | sarcosine oxidase subunit SoxD                                  | COG4311 | E | 100.00 | 100.00 |
| RCA23_c18520 | sarcosine oxidase beta subunit SoxB                             | COG0665 | E | 100.00 | 100.00 |
| RCA23_c18530 | cytochrome c-type biogenesis protein Cych                       | COG4235 | O | 100.00 | 100.00 |
| RCA23_c18540 | hypothetical protein                                            | COG0816 | L | 100.00 | 100.00 |
| RCA23_c18550 | hypothetical protein DUF1289                                    | COG3313 | R | 100.00 | 100.00 |
| RCA23_c18560 | hypothetical protein                                            |         |   | 100.00 | 100.00 |
| RCA23_c18570 | hypothetical protein DUF81                                      | COG0730 | R | 100.00 | 100.00 |
| RCA23_c18580 | tRNA-dihydrouridine synthase Dus                                | COG0042 | J | 97.08  | 83.63  |
| RCA23_c18590 | putative peroxiredoxin (thioredoxin reductase)                  | COG0678 | O | 0.00   | 0.00   |
| RCA23_c18600 | benzaldehyde dehydrogenase                                      | COG1012 | C | 0.00   | 0.00   |
| RCA23_c18610 | hypothetical protein                                            |         |   | 0.00   | 0.00   |
| RCA23_c18620 | hypothetical protein                                            | COG2130 | R | 99.52  | 100.00 |
| RCA23_c18630 | MFS-type transporter                                            | COG2814 | G | 100.00 | 100.00 |
| RCA23_c18640 | sorbitol dehydrogenase                                          | COG1028 | I | 100.00 | 100.00 |
| RCA23_c18650 | 6-hydroxynicotinate 3-monooxygenase                             | COG0654 | H | 100.00 | 85.61  |
| RCA23_c18660 | hypothetical protein                                            |         |   | 100.00 | 100.00 |
| RCA23_c18670 | glycerate kinase                                                | COG2379 | G | 100.00 | 90.19  |
| RCA23_c18680 | putative carboxymuconolactone decarboxylase                     | COG0599 | S | 100.00 | 100.00 |
| RCA23_c18690 | 2,4-dienoyl-CoA reductase [NADPH]                               | COG1902 | C | 100.00 | 97.17  |
| RCA23_c18700 | thiamine pyrophosphate protein                                  | COG0028 | E | 100.00 | 100.00 |
| RCA23_c18710 | rffG/rfbB: dTDP-glucose 4,6-dehydratase                         | COG1088 | M | 91.97  | 100.00 |

|              |                                                                              |         |   |        |        |
|--------------|------------------------------------------------------------------------------|---------|---|--------|--------|
| RCA23_c18720 | hypothetical protein                                                         |         |   | 100.00 | 94.02  |
| RCA23_c18730 | choline dehydrogenase BetA                                                   | COG2303 | E | 100.00 | 94.44  |
| RCA23_c18740 | succinyl-CoA:3-ketoacid-coenzyme A transferase subunit ScoB                  | COG2057 | I | 100.00 | 100.00 |
| RCA23_c18750 | succinyl-CoA:3-ketoacid-coenzyme A transferase subunit ScoA                  | COG1788 | I | 100.00 | 100.00 |
| RCA23_c18760 | hypothetical membrane protein                                                |         |   | 100.00 | 100.00 |
| RCA23_c18770 | putative dimethyl sulfoniopropionate demethylase DmdA                        | COG0404 | E | 100.00 | 100.00 |
| RCA23_c18780 | hydantoin utilization protein A                                              | COG0145 | E | 100.00 | 100.00 |
| RCA23_c18790 | hydantoin utilization protein B                                              | COG0146 | E | 100.00 | 94.67  |
| RCA23_c18800 | FAD dependent oxidoreductase                                                 | COG0665 | E | 73.78  | 100.00 |
| RCA23_c18810 | hypothetical protein, 3-beta hydroxysteroid dehydrogenase                    | COG0451 | M | 100.00 | 100.00 |
| RCA23_c18820 | hypothetical protein, serine/threonine-protein kinase                        | COG1262 | S | 100.00 | 100.00 |
| RCA23_c18830 | hypothetical protein                                                         | COG0457 | R | 100.00 | 85.69  |
| RCA23_c18840 | hypothetical protein DUF1989                                                 | COG3665 | S | 100.00 | 100.00 |
| RCA23_c18850 | putative diaminopropionate ammonia-lyase                                     | COG1171 | E | 70.99  | 100.00 |
| RCA23_c18860 | hypothetical protein, metallopeptidase M24                                   | COG0006 | E | 100.00 | 91.49  |
| RCA23_c18870 | hypothetical protein, Asp/Glu/hydantoin racemase                             | COG3473 | Q | 100.00 | 100.00 |
| RCA23_c18880 | putative 3-oxoadipate enol-lactonase 2, alpha/beta hydrolase family          | COG0596 | R | 100.00 | 100.00 |
| RCA23_c18890 | hypothetical protein DUF1185                                                 |         |   | 100.00 | 100.00 |
| RCA23_c18900 | limonene 1,2-monooxygenase LimB                                              | COG2141 | C | 100.00 | 100.00 |
| RCA23_c18910 | aldehyde dehydrogenase, cytosolic                                            | COG1012 | C | 100.00 | 100.00 |
| RCA23_c18920 | ABC transporter, spermidine/putrescine import, permease protein PotC         | COG1177 | E | 100.00 | 100.00 |
| RCA23_c18930 | ABC transporter, spermidine/putrescine import, permease protein PotB         | COG1176 | E | 100.00 | 100.00 |
| RCA23_c18940 | ABC transporter, spermidine/putrescine import, substrate binding protein Pot | COG0687 | E | 100.00 | 92.44  |
| RCA23_c18950 | ABC transporter, spermidine/putrescine import, ATP-binding protein PotA      | COG3842 | E | 100.00 | 84.06  |
| RCA23_c18960 | putative nitrilotriacetate monooxygenase component B                         | COG1853 | R | 100.00 | 100.00 |
| RCA23_c18970 | hypothetical protein, DUF268                                                 |         |   | 70.60  | 99.44  |
| RCA23_c18980 | hypothetical protein DUF28                                                   | COG0217 | S | 100.00 | 100.00 |
| RCA23_c18990 | sodium/sulphate symporter                                                    | COG0471 | P | 100.00 | 96.98  |
| RCA23_c19000 | hypothetical protein                                                         | COG0697 | G | 95.82  | 99.45  |
| RCA23_c19010 | hypothetical protein                                                         | COG1692 | S | 33.09  | 100.00 |
| RCA23_c19020 | osmotically inducible OsmC-like protein                                      | COG1764 | O | 100.00 | 100.00 |
| RCA23_c19030 | 3-hydroxyacyl-CoA dehydrogenase, NAD-binding                                 | COG1250 | I | 100.00 | 95.02  |
| RCA23_c19040 | putative transcriptional regulator                                           | COG0703 | E | 100.00 | 97.50  |

|              |                                                               |         |   |        |        |
|--------------|---------------------------------------------------------------|---------|---|--------|--------|
| RCA23_c19050 | thioesterase-like protein                                     | COG0824 | R | 31.07  | 100.00 |
| RCA23_c19060 | benzoyl-CoA oxygenase component A                             | COG0369 | P | 0.00   | 94.54  |
| RCA23_c19070 | benzoyl-CoA oxygenase component B                             | COG3396 | S | 86.65  | 98.01  |
| RCA23_c19080 | benzoyl-CoA-dihydrodiol lyase BoxC                            | COG1024 | I | 100.00 | 100.00 |
| RCA23_c19090 | hypothetical protein DUF309                                   |         |   | 100.00 | 100.00 |
| RCA23_c19100 | alpha/beta hydrolase                                          | COG0596 | R | 100.00 | 100.00 |
| RCA23_c19110 | benzoate-coenzyme A ligase                                    | COG0318 | I | 100.00 | 100.00 |
| RCA23_c19120 | putative 5-formyltetrahydrofolate cyclo-ligase family protein | COG0212 | H | 100.00 | 100.00 |
| RCA23_c19130 | magnesium transporter MgtE                                    | COG2239 | P | 100.00 | 97.82  |
| RCA23_c19140 | guanine deaminase GuaD                                        | COG0402 | F | 78.94  | 88.73  |
| RCA23_c19150 | putative hydroxydechloroatrazine ethylaminohydrolase          | COG0402 | F | 100.00 | 100.00 |
| RCA23_c19160 | putative inositol monophosphatase family protein              | COG0483 | G | 100.00 | 100.00 |
| RCA23_c19170 | putative helix-turn-helix protein                             | COG1396 | K | 100.00 | 100.00 |
| RCA23_c19180 | putative alcohol dehydrogenase                                | COG0604 | C | 100.00 | 100.00 |
| RCA23_c19190 | putative inner membrane protein                               | COG0670 | R | 100.00 | 100.00 |
| RCA23_c19200 | hypothetical protein                                          |         |   | 100.00 | 100.00 |
| RCA23_c19210 | putative N-acetylmuramoyl-L-alanine amidase amiD              | COG3023 | V | 100.00 | 100.00 |
| RCA23_c19220 | hypothetical protein                                          |         |   | 100.00 | 100.00 |
| RCA23_c19230 | glutamyl-tRNA(Gln) amidotransferase subunit A                 | COG0154 | J | 100.00 | 100.00 |
| RCA23_c19240 | aspartyl/glutamyl-tRNA(Asn/Gln) amidotransferase subunit GatC | COG0721 | J | 100.00 | 100.00 |
| RCA23_c19250 | putative deaminase                                            | COG0590 | F | 100.00 | 66.90  |
| RCA23_c19260 | putative ribosomal large subunit pseudouridine synthase B     | COG1187 | J | 100.00 | 100.00 |
| RCA23_c19270 | molybdate ABC transporter, ATP-binding protein ModC           | COG4148 | P | 100.00 | 97.94  |
| RCA23_c19280 | molybdate ABC transporter, pemease protein ModB               | COG4149 | P | 100.00 | 100.00 |
| RCA23_c19290 | molybdate ABC transporter, substrate binding protein ModA     | COG0725 | P | 92.51  | 100.00 |
| RCA23_c19300 | hypothetical protein, NUDIX hydrolase                         | COG0494 | L | 100.00 | 100.00 |
| RCA23_c19310 | hypothetical protein DUF1178                                  | COG5319 | S | 100.00 | 100.00 |
| RCA23_c19320 | aspartokinase LysC                                            | COG0527 | E | 100.00 | 100.00 |
| RCA23_c19330 | phosphoenolpyruvate-protein phosphotransferase PstI           | COG3605 | T | 100.00 | 99.02  |
| RCA23_c19340 | hypothetical protein, acetyltransferase-like                  | COG3153 | R | 100.00 | 100.00 |
| RCA23_c19350 | hypothetical protein                                          | COG1853 | R | 100.00 | 100.00 |
| RCA23_c19360 | putative sulfate transporter                                  | COG0659 | P | 100.00 | 100.00 |
| RCA23_c19370 | methylthioadenosine phosphorylase MtnP                        | COG0005 | F | 100.00 | 100.00 |

|              |                                                             |         |   |        |        |
|--------------|-------------------------------------------------------------|---------|---|--------|--------|
| RCA23_c19380 | adenine phosphoribosyltransferase Apt                       | COG0503 | F | 100.00 | 100.00 |
| RCA23_c19390 | ribosomal-protein-alanine acetyltransferase RimJ            | COG1670 | J | 100.00 | 100.00 |
| RCA23_c19400 | uncharacterized zinc protease YmxG                          | COG0612 | R | 100.00 | 100.00 |
| RCA23_c19410 | threonine synthase ThrC                                     | COG0498 | E | 100.00 | 100.00 |
| RCA23_c19420 | hypothetical protein, SURF1                                 | COG3346 | S | 100.00 | 100.00 |
| RCA23_c19430 | cytochrome c oxidase subunit 3                              | COG1845 | C | 100.00 | 97.64  |
| RCA23_c19440 | cytochrome c oxidase assembly protein CtaG                  | COG3175 | O | 100.00 | 100.00 |
| RCA23_c19450 | protoheme IX farnesyltransferase CtaB                       | COG0109 | O | 100.00 | 100.00 |
| RCA23_c19460 | cytochrome c oxidase subunit 2 precursor                    | COG1622 | C | 100.00 | 100.00 |
| RCA23_c19470 | protein TldD                                                | COG0312 | R | 100.00 | 96.41  |
| RCA23_c19480 | SMF family protein                                          | COG0758 | L | 100.00 | 97.57  |
| RCA23_c19490 | DNA topoisomerase TopA                                      | COG0550 | L | 66.94  | 100.00 |
| RCA23_c19500 | fructose-bisphosphate aldolase Fba                          | COG0191 | G | 100.00 | 100.00 |
| RCA23_c19510 | 5-deoxy-glucuronate isomerase lolB                          | COG3718 | G | 100.00 | 100.00 |
| RCA23_c19520 | 5-dehydro-2-deoxygluconokinase lolC                         | COG0524 | G | 100.00 | 95.76  |
| RCA23_c19530 | 3D-(3,5/4)-trihydroxycyclohexane-1,2-dione hydrolase lolD   | COG3962 | E | 100.00 | 100.00 |
| RCA23_c19540 | hypothetical protein DUF989                                 | COG3748 | S | 100.00 | 100.00 |
| RCA23_c19550 | 5-hydroxyisourate hydrolase UraH                            | COG2351 | R | 100.00 | 100.00 |
| RCA23_c19560 | uric acid degradation bifunctional protein PuL              | COG3195 | S | 100.00 | 96.32  |
| RCA23_c19570 | putative allantoin catabolism protein YlbA                  | COG3257 | R | 100.00 | 97.94  |
| RCA23_c19580 | sarcosine oxidase beta subunit SoxB                         | COG0665 | E | 100.00 | 100.00 |
| RCA23_c19590 | sarcosine oxidase subunit SoxD                              | COG4311 | E | 100.00 | 100.00 |
| RCA23_c19600 | sarcosine oxidase alpha subunit SoxA                        | COG0404 | E | 99.56  | 99.42  |
| RCA23_c19610 | sarcosine oxidase subunit SoxG                              | COG4583 | E | 100.00 | 100.00 |
| RCA23_c19620 | putative HTH-type transcriptional regulator, AraC family    | COG4977 | K | 100.00 | 98.81  |
| RCA23_c19630 | putative DNA-binding protein                                | COG1396 | K | 100.00 | 99.85  |
| RCA23_c19640 | putative membrane protein                                   |         |   | 100.00 | 100.00 |
| RCA23_c19650 | hypothetical protein                                        |         |   | 100.00 | 87.92  |
| RCA23_c19660 | hypothetical protein, thioesterase                          | COG2050 | Q | 15.78  | 100.00 |
| RCA23_c19670 | hypothetical protein, calcineurin-like phosphoesterase-like | COG1407 | R | 91.10  | 74.81  |
| RCA23_c19680 | putative DEAD/DEAH box helicase                             | COG1201 | R | 100.00 | 97.90  |
| RCA23_c19690 | bidunctional enzyme Fold                                    | COG0190 | H | 100.00 | 100.00 |
| RCA23_c19700 | formate--tetrahydrofolate ligase Fhs                        | COG2759 | F | 100.00 | 98.45  |

|              |                                                                 |         |   |        |        |
|--------------|-----------------------------------------------------------------|---------|---|--------|--------|
| RCA23_c19710 | hypothetical protein                                            |         |   | 100.00 | 100.00 |
| RCA23_c19720 | cell division protease FtsH                                     | COG0465 | O | 100.00 | 100.00 |
| RCA23_c19730 | tRNA(Ile)-lysidine synthase TilS                                | COG0037 | D | 100.00 | 100.00 |
| RCA23_c19740 | hypothetical protein                                            | COG1729 | S | 100.00 | 100.00 |
| RCA23_c19750 | peptidoglycan-associated lipoprotein Pal                        | COG2885 | M | 100.00 | 90.42  |
| RCA23_c19760 | Tol-Pal system beta propeller repeat protein TolB               | COG0823 | U | 100.00 | 100.00 |
| RCA23_c19770 | hypothetical protein, TolA-like                                 |         |   | 100.00 | 86.45  |
| RCA23_c19780 | biopolymer transport protein TolR                               | COG0848 | U | 100.00 | 100.00 |
| RCA23_c19790 | biopolymer transport protein TolQ                               | COG0811 | U | 100.00 | 100.00 |
| RCA23_c19800 | acyl-CoA thioester hydrolase                                    | COG0824 | R | 100.00 | 100.00 |
| RCA23_c19810 | hypothetical protein                                            |         |   | 100.00 | 100.00 |
| RCA23_c19820 | holliday junction ATP-dependent DNA helicase RuvB               | COG2255 | L | 100.00 | 100.00 |
| RCA23_c19830 | holliday junction ATP-dependent DNA helicase RuvA               | COG0632 | L | 100.00 | 100.00 |
| RCA23_c19840 | crossover junction endodeoxyribonuclease RuvC                   | COG0817 | L | 100.00 | 100.00 |
| RCA23_c19850 | putative ribosomal protein L11 methyltransferase                | COG2264 | J | 100.00 | 100.00 |
| RCA23_c19860 | peptide methionine sulfoxide reductase MsrA                     | COG0225 | O | 100.00 | 100.00 |
| RCA23_c19870 | hypothetical protein, major facilitator superfamily transporter |         |   | 100.00 | 100.00 |
| RCA23_c19880 | L-lactate dehydrogenase lldD                                    | COG1304 | C | 100.00 | 100.00 |
| RCA23_c19890 | BCCT family transporter involved in DMSF uptake                 | COG1292 | M | 100.00 | 91.01  |
| RCA23_c19900 | putative MFS-type transporter                                   |         |   | 100.00 | 87.26  |
| RCA23_c19910 | 50S ribosomal protein L25                                       | COG1825 | J | 100.00 | 100.00 |
| RCA23_c19920 | peptidyl-tRNA hydrolase Pth                                     | COG0193 | J | 100.00 | 100.00 |
| RCA23_c19930 | hypothetical protein                                            | COG4427 | S | 100.00 | 99.22  |
| RCA23_c19940 | hypothetical protein                                            | COG3651 | S | 100.00 | 100.00 |
| RCA23_c19950 | tryptophan synthase beta chain TrpB                             | COG0133 | E | 100.00 | 100.00 |
| RCA23_c19960 | N-(5'-phosphoribosyl)anthranilate isomerase TrpF                | COG0135 | E | 100.00 | 100.00 |
| RCA23_c19970 | hypothetical protein                                            |         |   | 100.00 | 100.00 |
| RCA23_c19980 | integration host factor beta subunit IhfB                       | COG0776 | L | 100.00 | 100.00 |
| RCA23_c19990 | 30S ribosomal protein S1                                        | COG0539 | J | 100.00 | 100.00 |
| RCA23_c20000 | hypothetical protein                                            |         |   | 100.00 | 100.00 |
| RCA23_c20010 | hypothetical protein, lacI family HTH-type regulatory protein   | COG1609 | K | 0.88   | 100.00 |
| RCA23_c20020 | putative phytanoyl-CoA dioxygenase                              | COG5285 | Q | 33.68  | 100.00 |
| RCA23_c20030 | aldo/keto reductase                                             | COG0667 | C | 100.00 | 100.00 |

|              |                                                                             |         |   |        |        |
|--------------|-----------------------------------------------------------------------------|---------|---|--------|--------|
| RCA23_c20040 | cytidylate kinase Cmk                                                       | COG0283 | F | 15.77  | 94.05  |
| RCA23_c20050 | 3-phosphoshikimate 1-carboxyvinyltransferase AroA                           | COG0128 | E | 100.00 | 100.00 |
| RCA23_c20060 | tRNA (guanine-N(7)-)-methyltransferase TrmB                                 | COG0220 | R | 100.00 | 100.00 |
| RCA23_c20070 | S-adenosylmethionine synthase MetK                                          | COG0192 | H | 100.00 | 100.00 |
| RCA23_c20080 | apolipoprotein N-acyltransferase Lnt                                        | COG0815 | M | 100.00 | 100.00 |
| RCA23_c20090 | putative magnesium and cobalt efflux protein                                | COG1253 | R | 100.00 | 100.00 |
| RCA23_c20100 | hypothetical protein UPF0054                                                | COG0319 | R | 100.00 | 100.00 |
| RCA23_c20110 | PhoH-like protein                                                           | COG1702 | T | 100.00 | 100.00 |
| RCA23_c20120 | RNA modification enzyme, MiaB family                                        | COG0621 | J | 100.00 | 96.92  |
| RCA23_c20130 | hypothetical protein                                                        |         |   | 100.00 | 100.00 |
| RCA23_c20140 | putative ferric uptake regulator family protein                             | COG0735 | P | 100.00 | 100.00 |
| RCA23_c20150 | 3-hydroxydecanoyl-[acyl-carrier-protein] dehydratase FabA                   | COG0764 | I | 100.00 | 100.00 |
| RCA23_c20160 | 3-oxoacyl-[acyl-carrier-protein] synthase FabB                              | COG0304 | I | 100.00 | 100.00 |
| RCA23_c20170 | enoyl-[acyl-carrier-protein] reductase FabI                                 | COG0623 | I | 100.00 | 97.47  |
| RCA23_c20180 | threo-3-hydroxyaspartate ammonia-lyase SRY                                  | COG1171 | E | 100.00 | 100.00 |
| RCA23_c20190 | 2-haloalkanoic acid dehalogenase                                            | COG1011 | R | 100.00 | 97.51  |
| RCA23_c20200 | 3-oxoadipate enol-lactonase CatD                                            | COG0596 | R | 100.00 | 100.00 |
| RCA23_c20210 | putative tetracycline resistance protein, class C                           | COG2814 | G | 100.00 | 97.88  |
| RCA23_c20220 | NAD/mycothiol-dependent formaldehyde dehydrogenase                          | COG1062 | C | 100.00 | 100.00 |
| RCA23_c20230 | D-galactonate dehydratase DgoD                                              | COG4948 | M | 100.00 | 100.00 |
| RCA23_c20240 | dimethylglycine dehydrogenase                                               | COG0404 | E | 100.00 | 99.88  |
| RCA23_c20250 | trimethylamine methyltransferase MttB                                       | COG5598 | H | 100.00 | 99.42  |
| RCA23_c20260 | hypothetical protein                                                        | COG0607 | P | 100.00 | 100.00 |
| RCA23_c20270 | uncharacterized aminotransferase                                            | COG0161 | H | 100.00 | 100.00 |
| RCA23_c20280 | aminomethyltransferase, mitochondrial                                       | COG0404 | E | 100.00 | 98.18  |
| RCA23_c20290 | glycine cleavage system protein GcvH                                        | COG0509 | E | 100.00 | 100.00 |
| RCA23_c20300 | glycine dehydrogenase GcvP                                                  | COG1003 | E | 100.00 | 99.96  |
| RCA23_c20310 | D-amino acid dehydrogenase small subunit DadA                               | COG0665 | E | 100.00 | 100.00 |
| RCA23_c20320 | putrescine ABC transport system putrescine-binding periplasmic protein PotF | COG0687 | E | 100.00 | 100.00 |
| RCA23_c20330 | putrescine ABC transport system ATP-binding protein PotG                    | COG3842 | E | 100.00 | 100.00 |
| RCA23_c20340 | putrescine ABC transport system permease protein PotI                       | COG1177 | E | 100.00 | 100.00 |
| RCA23_c20350 | putrescine ABC transport system permease protein PotB                       | COG1176 | E | 100.00 | 100.00 |
| RCA23_c20360 | rieske 2Fe-2S domain protein                                                | COG4638 | P | 100.00 | 100.00 |



|              |                                                                         |         |   |        |        |
|--------------|-------------------------------------------------------------------------|---------|---|--------|--------|
| RCA23_c20370 | TRAP dicarboxylate transporter, subunit DctM                            | COG1593 | G | 100.00 | 100.00 |
| RCA23_c20380 | TRAP dicarboxylate transporter, subunit DctQ                            | COG3090 | G | 100.00 | 100.00 |
| RCA23_c20390 | TRAP dicarboxylate transporter, subunit DctP                            | COG1638 | G | 100.00 | 100.00 |
| RCA23_c20400 | putative phytanoyl-CoA dioxygenase                                      | COG5285 | Q | 100.00 | 100.00 |
| RCA23_c20410 | putative phenylacetic acid degradation NADH oxidoreductase PaaE         | COG1018 | C | 100.00 | 82.96  |
| RCA23_c20420 | phenylacetate-CoA oxygenase, subunit PaaD                               | COG2151 | R | 100.00 | 100.00 |
| RCA23_c20430 | phenylacetate-CoA oxygenase, subunit PaaC                               | COG3396 | S | 100.00 | 100.00 |
| RCA23_c20440 | phenylacetate-CoA oxygenase, subunit PaaB                               | COG3460 | Q | 100.00 | 100.00 |
| RCA23_c20450 | phenylacetate-CoA oxygenase, subunit PaaA                               | COG3396 | S | 100.00 | 100.00 |
| RCA23_c20460 | phenylacetic acid degradation operon negative regulatory protein PaaX   | COG3327 | K | 100.00 | 100.00 |
| RCA23_c20470 | phenylacetic acid degradation protein PaaZ                              | COG1012 | C | 100.00 | 100.00 |
| RCA23_c20480 | putative enoyl-CoA hydratase PaaG                                       | COG1024 | I | 100.00 | 100.00 |
| RCA23_c20490 | acyl-coenzyme A thioesterase PaaI                                       | COG2050 | Q | 100.00 | 100.00 |
| RCA23_c20500 | beta-ketoadipyl CoA thiolase PaaJ                                       | COG0183 | I | 100.00 | 100.00 |
| RCA23_c20510 | phenylacetate-CoA ligase PaaK                                           | COG1541 | H | 100.00 | 100.00 |
| RCA23_c20520 | putative HTH-type transcriptional regulator, TetR family                | COG1309 | K | 100.00 | 100.00 |
| RCA23_c20530 | 3-dehydroquinate dehydratase AroQ                                       | COG0757 | E | 100.00 | 100.00 |
| RCA23_c20540 | tyrosine decarboxylase                                                  | COG0076 | E | 100.00 | 100.00 |
| RCA23_c20550 | putative short chain dehydrogenase                                      | COG0300 | R | 100.00 | 100.00 |
| RCA23_c20560 | hypothetical protein, acetyltransferase-like                            | COG1247 | M | 100.00 | 100.00 |
| RCA23_c20570 | protein CsaA                                                            | COG0073 | R | 100.00 | 100.00 |
| RCA23_c20580 | pyrroline-5-carboxylate reductase ProC                                  | COG0345 | E | 100.00 | 88.85  |
| RCA23_c20590 | hypothetical protein DUF1790                                            | COG5465 | S | 100.00 | 100.00 |
| RCA23_c20600 | hypothetical protein DUF526                                             | COG2960 | S | 100.00 | 82.81  |
| RCA23_c20610 | prolipoprotein diacylglyceryl transferase Lgt                           | COG0682 | M | 100.00 | 100.00 |
| RCA23_c20620 | hypothetical protein DUF185                                             | COG1565 | S | 100.00 | 100.00 |
| RCA23_c20630 | multi-copper polyphenol oxidoreductase laccase                          | COG1496 | S | 100.00 | 100.00 |
| RCA23_c20640 | hypothetical protein                                                    |         |   | 100.00 | 85.94  |
| RCA23_c20650 | leucine-responsive regulatory protein Lrp                               | COG1522 | K | 100.00 | 93.74  |
| RCA23_c20660 | thioredoxin reductase TrxB                                              | COG0492 | O | 100.00 | 100.00 |
| RCA23_c20670 | bifunctional sulfate adenylyltransferase / adenylyl-sulfate kinase CysC | COG2046 | P | 100.00 | 100.00 |
| RCA23_c20680 | hypothetical protein DUF1150                                            |         |   | 100.00 | 100.00 |
| RCA23_c20690 | small heat shock protein IbpA                                           | COG0071 | O | 100.00 | 100.00 |

|              |                                                                      |         |   |        |        |
|--------------|----------------------------------------------------------------------|---------|---|--------|--------|
| RCA23_c20700 | hypothetical protein DUF465                                          | COG5481 | S | 100.00 | 100.00 |
| RCA23_c20710 | N5-carboxyaminoimidazole ribonucleotide mutase PurE                  | COG0041 | F | 100.00 | 100.00 |
| RCA23_c20720 | N5-carboxyaminoimidazole ribonucleotide synthase PurK                | COG0026 | F | 100.00 | 100.00 |
| RCA23_c20730 | hypothetical protein                                                 | COG1075 | R | 100.00 | 84.51  |
| RCA23_c20740 | chaperonin GroEL                                                     | COG0459 | O | 77.09  | 97.64  |
| RCA23_c20750 | chaperonin GroS                                                      | COG0234 | O | 3.82   | 100.00 |
| RCA23_c20760 | hypothetical protein                                                 |         |   | 100.00 | 99.68  |
| RCA23_c20770 | hypothetical protein                                                 |         |   | 100.00 | 86.83  |
| RCA23_c20780 | hypothetical protein                                                 |         |   | 100.00 | 100.00 |
| RCA23_c20790 | creatinase                                                           | COG0006 | E | 100.00 | 100.00 |
| RCA23_c20800 | putative membrane lipoprotein                                        |         |   | 100.00 | 100.00 |
| RCA23_c20810 | hypothetical protein DUF261                                          | COG5482 | S | 100.00 | 100.00 |
| RCA23_c20820 | putative manganese-dependent inorganic pyrophosphatase PpaC          | COG1227 | C | 100.00 | 100.00 |
| RCA23_c20830 | hypothetical protein, HAD family hydrolase                           | COG0647 | G | 100.00 | 100.00 |
| RCA23_c20840 | putative MaoC-like dehydratase                                       | COG2030 | I | 100.00 | 100.00 |
| RCA23_c20850 | riboflavin biosynthesis protein RibF                                 | COG0196 | H | 100.00 | 100.00 |
| RCA23_c20860 | hypothetical protein UPF0260                                         | COG2983 | S | 100.00 | 100.00 |
| RCA23_c20870 | low specificity L-threonine aldolase ItaE                            | COG2008 | E | 100.00 | 100.00 |
| RCA23_c20880 | hypothetical protein, 2-hydroxychromene-2-carboxylate isomerase-like | COG3917 | Q | 100.00 | 100.00 |
| RCA23_c20890 | ribose-phosphate pyrophosphokinase Prs                               | COG0462 | F | 79.31  | 100.00 |
| RCA23_c20900 | hypothetical protein                                                 |         |   | 100.00 | 80.37  |
| RCA23_c20910 | ATP synthase epsilon chain AtpC                                      | COG0355 | C | 100.00 | 100.00 |
| RCA23_c20920 | ATP synthase beta subunit AtpD                                       | COG0055 | C | 100.00 | 95.93  |
| RCA23_c20930 | ATP synthase gamma chain AtpG                                        | COG0224 | C | 100.00 | 95.86  |
| RCA23_c20940 | ATP synthase alpha subunit AtpA                                      | COG0056 | C | 100.00 | 100.00 |
| RCA23_c20950 | ATP synthase delta chain AtpH                                        | COG0712 | C | 100.00 | 98.24  |
| RCA23_c20960 | hypothetical protein                                                 |         |   | 88.98  | 100.00 |
| RCA23_c20970 | hydroxyacylglutathione hydrolase GloB                                | COG0491 | R | 100.00 | 100.00 |
| RCA23_c20980 | ATP-dependent Clp protease ATP-binding subunit ClpA                  | COG0542 | O | 100.00 | 100.00 |
| RCA23_c20990 | hypothetical protein, OmpA                                           | COG1360 | N | 100.00 | 100.00 |
| RCA23_c21000 | hypothetical protein                                                 |         |   | 100.00 | 100.00 |
| RCA23_c21010 | putative cation transport protein ChaC                               | COG3703 | P | 100.00 | 93.41  |
| RCA23_c21020 | hypothetical protein                                                 | COG1357 | S | 88.91  | 90.70  |

|              |                                                            |         |   |        |        |
|--------------|------------------------------------------------------------|---------|---|--------|--------|
| RCA23_c21030 | protein TyrC                                               | COG0287 | E | 100.00 | 100.00 |
| RCA23_c21040 | histidinol-phosphate aminotransferase HisC                 | COG0079 | E | 100.00 | 100.00 |
| RCA23_c21050 | 30S ribosomal protein S4                                   | COG0522 | J | 100.00 | 91.17  |
| RCA23_c21060 | cold-shock DEAD box protein A                              | COG0513 | L | 100.00 | 100.00 |
| RCA23_c21070 | hypothetical protein DUF393                                | COG3011 | S | 100.00 | 100.00 |
| RCA23_c21080 | vitamin B12-dependent ribonucleoside-diphosphate reductase | COG0209 | F | 100.00 | 100.00 |
| RCA23_c21090 | hypothetical protein                                       | COG5458 | S | 100.00 | 100.00 |
| RCA23_c21100 | ATP-phosphoribosyltransferase HisG                         | COG0040 | E | 100.00 | 100.00 |
| RCA23_c21110 | ATP phosphoribosyltransferase regulatory subunit HisZ      | COG3705 | E | 98.19  | 95.42  |
| RCA23_c21120 | histidyl-tRNA synthase HisS                                | COG0124 | J | 73.57  | 100.00 |
| RCA23_c21130 | hypothetical protein                                       | COG2900 | S | 100.00 | 100.00 |
| RCA23_c21140 | DNA polymerase III 1 alpha subunit DnaE                    | COG0587 | L | 100.00 | 98.86  |
| RCA23_c21150 | xanthine dehydrogenase XdhA                                | COG4630 | F | 100.00 | 100.00 |
| RCA23_c21160 | xanthine dehydrogenase XdhB                                | COG4631 | F | 95.14  | 98.87  |
| RCA23_c21170 | xanthine dehydrogenase accessory protein XdhC              | COG1975 | O | 100.00 | 100.00 |
| RCA23_c21180 | sugar ABC transporter, ATP-binding protein                 | COG3845 | R | 100.00 | 100.00 |
| RCA23_c21190 | sugar ABC transporter, permease protein                    | COG4603 | R | 100.00 | 91.90  |
| RCA23_c21200 | ABC transporter permease protein                           | COG1079 | R | 100.00 | 100.00 |
| RCA23_c21210 | putative basic membrane protein                            | COG1744 | R | 100.00 | 100.00 |
| RCA23_c21220 | putative FAD dependent oxidoreductase                      | COG0665 | E | 86.30  | 100.00 |
| RCA23_c21230 | dimethylglycine dehydrogenase                              | COG0404 | E | 99.44  | 100.00 |
| RCA23_c21240 | pantothenate synthase PanC                                 | COG0414 | H | 100.00 | 80.00  |
| RCA23_c21250 | 3-methyl-2-oxobutanoate hydroxymethyltransferase PanB      | COG0413 | H | 100.00 | 100.00 |
| RCA23_c21260 | hypothetical protein                                       | COG3807 | S | 100.00 | 100.00 |
| RCA23_c21270 | peptidyl-dipeptidase Dcp                                   | COG0339 | E | 58.17  | 99.85  |
| RCA23_c21280 | molybdopterin biosynthesis protein MoeB                    | COG0476 | H | 100.00 | 100.00 |
| RCA23_c21290 | deoxyuridine 5'-triphosphate nucleotidohydrolase Dut       | COG0756 | F | 100.00 | 100.00 |
| RCA23_c21300 | coenzyme A biosynthesis bifunctional protein CoaBC         | COG0452 | H | 100.00 | 100.00 |
| RCA23_c21310 | RNA polymerase sigma-32 factor RpoH                        | COG0568 | K | 100.00 | 98.63  |
| RCA23_c21320 | bifunctional adenosylcobalamin biosynthesis protein CobP   | COG2087 | H | 100.00 | 100.00 |
| RCA23_c21330 | putative phosphoglycerate mutase family protein            | COG0406 | G | 100.00 | 100.00 |
| RCA23_c21340 | hypothetical protein, glutathione S-transferase            | COG0625 | O | 100.00 | 100.00 |
| RCA23_c21350 | glutathione S-transferase family protein                   |         |   | 100.00 | 100.00 |

|              |                                                                 |         |   |        |        |
|--------------|-----------------------------------------------------------------|---------|---|--------|--------|
| RCA23_c21360 | magnesium chelatase-like protein                                | COG0606 | O | 100.00 | 100.00 |
| RCA23_c21370 | magnesium chelatase                                             | COG0606 | O | 100.00 | 91.27  |
| RCA23_c21380 | putative transmembrane protein                                  |         |   | 43.10  | 100.00 |
| RCA23_c21390 | putative sulfite exporter TauE/SafE                             | COG0730 | R | 20.92  | 100.00 |
| RCA23_c21400 | branched-chain amino acid transporter, permease component       | COG1079 | R | 100.00 | 100.00 |
| RCA23_c21410 | branched-chain amino acid transporter, permease component       | COG4603 | R | 100.00 | 100.00 |
| RCA23_c21420 | ABC transporter ATP-binding protein                             | COG3845 | R | 100.00 | 97.79  |
| RCA23_c21430 | putative ABC transporter, periplasmic substrate-binding protein | COG1744 | R | 100.00 | 100.00 |
| RCA23_c21440 | hypothetical protein, acetyltransferase-like                    | COG0456 | R | 100.00 | 100.00 |
| RCA23_c21450 | NifU-like protein                                               | COG0694 | O | 100.00 | 100.00 |
| RCA23_c21460 | putative universal stress protein                               | COG0589 | T | 100.00 | 94.35  |
| RCA23_c21470 | tryptophanyl-tRNA synthase TrpS                                 | COG0180 | J | 100.00 | 100.00 |
| RCA23_c21480 | hypothetical protein, rhomboid protease                         | COG0705 | R | 100.00 | 87.56  |
| RCA23_c21490 | virulence factor MviN homolog                                   | COG0728 | R | 94.92  | 100.00 |
| RCA23_c21500 | uridylyltransferase GlnD                                        | COG2844 | O | 100.00 | 100.00 |
| RCA23_c21510 | hypothetical protein                                            | COG0683 | E | 100.00 | 100.00 |
| RCA23_c21520 | putative tetrapyrrole methylase                                 | COG0313 | R | 100.00 | 100.00 |
| RCA23_c21530 | hypothetical protein UPF0102                                    | COG0792 | L | 100.00 | 100.00 |
| RCA23_c21540 | glutathione synthase GshB                                       | COG0189 | H | 100.00 | 100.00 |
| RCA23_c21550 | putative esterase/lipase                                        | COG0657 | I | 100.00 | 97.46  |
| RCA23_c21560 | NusB-like protein NusB                                          | COG0781 | K | 100.00 | 100.00 |
| RCA23_c21570 | 6,7-dimethyl-8-ribityllumazine synthase RibH                    | COG0054 | H | 100.00 | 100.00 |
| RCA23_c21580 | riboflavin biosynthesis protein RibB                            | COG0108 | H | 100.00 | 100.00 |
| RCA23_c21590 | riboflavin synthase alpha chain RibE                            | COG0307 | H | 100.00 | 89.97  |
| RCA23_c21600 | putative capsule polysaccharide export protein                  | COG3562 | M | 100.00 | 98.39  |
| RCA23_c21610 | putative polysaccharide export protein                          | COG1596 | M | 100.00 | 89.38  |
| RCA23_c21620 | putative capsule polysaccharide export protein                  | COG3563 | M | 90.91  | 100.00 |
| RCA23_c21630 | riboflavin biosynthesis protein RibD                            | COG0117 | H | 100.00 | 100.00 |
| RCA23_c21640 | transcriptional repressor NrdR                                  | COG1327 | K | 100.00 | 100.00 |
| RCA23_c21650 | RNA polymerase sigma factor RpoD                                | COG0568 | K | 100.00 | 100.00 |
| RCA23_c21660 | DNA primase DnaG                                                | COG0358 | L | 100.00 | 100.00 |
| RCA23_c21670 | sarcosine oxidase subunit SoxG                                  | COG4583 | E | 100.00 | 100.00 |
| RCA23_c21680 | sarcosine oxidase alpha subunit SoxA                            | COG0404 | E | 100.00 | 98.16  |

|              |                                                                |         |   |        |        |
|--------------|----------------------------------------------------------------|---------|---|--------|--------|
| RCA23_c21690 | sarcosine oxidase subunit SoxD                                 | COG4311 | E | 100.00 | 100.00 |
| RCA23_c21700 | sarcosine oxidase beta subunit SoxB                            | COG0665 | E | 100.00 | 100.00 |
| RCA23_c21710 | phosphatidylserine decarboxylase proenzyme Psd                 | COG0688 | I | 100.00 | 100.00 |
| RCA23_c21720 | diacylglycerol kinase                                          | COG0818 | M | 100.00 | 100.00 |
| RCA23_c21730 | putative sulfatase                                             | COG2194 | R | 100.00 | 100.00 |
| RCA23_c21740 | hypothetical protein, CDP-alcohol phosphatidyltransferase-like | COG1183 | I | 100.00 | 100.00 |
| RCA23_c21750 | hypothetical protein                                           | COG0671 | I | 100.00 | 100.00 |
| RCA23_c21760 | hypothetical protein                                           | COG2194 | R | 100.00 | 100.00 |
| RCA23_c21770 | hypothetical protein, DUF1705                                  | COG2194 | R | 100.00 | 100.00 |
| RCA23_c21780 | glutamate dehydrogenase GluD                                   | COG0334 | E | 96.73  | 99.23  |
| RCA23_c21790 | hypothetical protein                                           |         |   | 100.00 | 100.00 |
| RCA23_c21800 | 2-hydroxy-3-oxopropionate reductase GarR                       | COG2084 | I | 90.37  | 100.00 |
| RCA23_c21810 | reductive dehalogenase                                         | COG1600 | C | 26.15  | 100.00 |
| RCA23_c21820 | pirin                                                          | COG1741 | R | 100.00 | 99.67  |
| RCA23_c21830 | transcriptional regulator                                      | COG1309 | K | 100.00 | 100.00 |
| RCA23_c21840 | hypothetical protein                                           |         |   | 100.00 | 100.00 |
| RCA23_c21850 | homoserine dehydrogenase Hom                                   | COG0460 | E | 91.55  | 100.00 |
| RCA23_c21860 | fructose-1,6-bisphosphatase class II                           | COG1494 | G | 100.00 | 100.00 |
| RCA23_c21870 | putative single-stranded-DNA-specific exonuclease              | COG0608 | L | 100.00 | 100.00 |
| RCA23_c21890 | sulfopyruvate decarboxylase beta subunit ComE                  | COG0028 | E | 100.00 | 100.00 |
| RCA23_c21900 | sulfopyruvate decarboxylase alpha subunit ComD                 | COG4032 | R | 100.00 | 100.00 |
| RCA23_c21910 | zinc-type alcohol dehydrogenase                                | COG1063 | E | 100.00 | 100.00 |
| RCA23_c21920 | gluconate 5-dehydrogenase Gno                                  | COG1028 | I | 100.00 | 100.00 |
| RCA23_c21930 | histidinol dehydrogenase HisD                                  | COG0141 | E | 100.00 | 100.00 |
| RCA23_c21940 | HTH-type transcriptional regulator, Lacl family                | COG1609 | K | 100.00 | 100.00 |
| RCA23_c21950 | HTH-type transcriptional regulator, IclR family                | COG1414 | K | 100.00 | 100.00 |
| RCA23_c21960 | alcohol dehydrogenase AlkJ                                     | COG2303 | E | 100.00 | 95.01  |
| RCA23_c21970 | integral membrane protein TerC                                 | COG0861 | P | 100.00 | 86.40  |
| RCA23_c21980 | putative TRAP transporter, DctP subunit                        | COG4663 | Q | 33.69  | 100.00 |
| RCA23_c21990 | TRAP transporter, DctM/DctQ subunit                            | COG4664 | Q | 89.37  | 100.00 |
| RCA23_c22000 | trimethylamine methyltransferase                               | COG5598 | H | 99.44  | 100.00 |
| RCA23_c22010 | putative HAD-family hydrolase                                  | COG0546 | R | 98.57  | 77.40  |
| RCA23_c22020 | hypothetical protein                                           |         |   | 0.00   | 100.00 |

|              |                                                        |         |   |      |        |        |
|--------------|--------------------------------------------------------|---------|---|------|--------|--------|
| RCA23_c22030 | hypothetical protein                                   |         |   |      | 0.00   | 100.00 |
| RCA23_c22040 | hypothetical protein                                   |         |   |      | 72.85  | 88.66  |
| RCA23_c22050 | hypothetical protein                                   | COG5349 | S |      | 100.00 | 100.00 |
| RCA23_c22060 | hypothetical protein, NUDIX hydrolase                  | COG0494 | L |      | 100.00 | 100.00 |
| RCA23_c22070 | hypothetical protein                                   |         |   |      | 100.00 | 100.00 |
| RCA23_c22080 | putative fatty acid desaturase                         | COG3239 | I |      | 100.00 | 100.00 |
| RCA23_c22090 | putative helix-turn-helix protein                      | COG1396 | K |      | 100.00 | 100.00 |
| RCA23_c22100 | short chain dehydrogenase                              | COG1028 | I |      | 100.00 | 100.00 |
| RCA23_c22110 | putative 3-hydroxyacyl-CoA dehydrogenase               | COG1250 | I |      | 100.00 | 100.00 |
| RCA23_c22130 | hypothetical protein, DUF849                           | COG3246 | S |      | 100.00 | 100.00 |
| RCA23_c22120 | transcriptional regulator, AraC family                 | COG4977 | K |      | 100.00 | 98.15  |
| RCA23_c22140 | protein Tas                                            | COG0667 | C |      | 100.00 | 100.00 |
| RCA23_c22150 | hypothetical protein                                   | COG4544 | S |      | 100.00 | 100.00 |
| RCA23_c22160 | putative MFS-type transporter                          | COG2211 | G |      | 100.00 | 99.35  |
| RCA23_c22170 | methionyl-tRNA synthase MetG                           | COG0143 | J |      | 100.00 | 100.00 |
| RCA23_c22190 | integrase                                              |         |   | GI 8 | 65.69  | 100.00 |
| RCA23_c22200 | integrase                                              | COG4974 | L | GI 8 | 100.00 | 93.84  |
| RCA23_c22210 | putative nucleotidyl transferase                       | COG1210 | M | GI 8 | 42.77  | 100.00 |
| RCA23_c22220 | hypothetical protein                                   |         |   | GI 8 | 0.00   | 92.08  |
| RCA23_c22230 | hypothetical protein                                   |         |   | GI 8 | 7.79   | 76.78  |
| RCA23_c22240 | putative replication factor C, small subunit           | COG2256 | L | GI 8 | 100.00 | 100.00 |
| RCA23_c22250 | hypothetical protein                                   |         |   | GI 8 | 100.00 | 100.00 |
| RCA23_c22260 | hypothetical protein                                   |         |   | GI 8 | 100.00 | 98.44  |
| RCA23_c22270 | ParB-like nuclease                                     | COG1475 | K | GI 8 | 100.00 | 97.83  |
| RCA23_c22280 | cadmium-transporting ATPase CadA                       | COG2217 | P | GI 8 | 94.20  | 92.03  |
| RCA23_c22290 | hypothetical protein                                   | COG3034 | S | GI 8 | 0.00   | 100.00 |
| RCA23_c22300 | putative lipoprotein signal peptidase                  | COG0597 | M | GI 8 | 0.00   | 100.00 |
| RCA23_c22310 | putative ZIP zinc transporter                          | COG0428 | P | GI 8 | 3.41   | 100.00 |
| RCA23_c22320 | hypothetical protein DUF411                            | COG3019 | R | GI 8 | 100.00 | 100.00 |
| RCA23_c22330 | SCO-like protein                                       | COG1999 | R | GI 8 | 100.00 | 100.00 |
| RCA23_c22340 | hypothetical protein                                   | COG2847 | S | GI 8 | 100.00 | 100.00 |
| RCA23_c22350 | hypothetical protein                                   | COG1651 | O | GI 8 | 100.00 | 100.00 |
| RCA23_c22360 | hypothetical protein, disulfide bond formation protein | COG1495 | O | GI 8 | 100.00 | 100.00 |

|              |                                                                       |         |   |      |        |        |
|--------------|-----------------------------------------------------------------------|---------|---|------|--------|--------|
| RCA23_c22370 | SCO-like protein                                                      | COG1999 | R | GI 8 | 100.00 | 100.00 |
| RCA23_c22380 | putative HTH-type transcriptional regulator                           | COG0789 | K | GI 8 | 100.00 | 100.00 |
| RCA23_c22390 | hypothetical protein UPF0060                                          | COG1742 | S | GI 8 | 26.61  | 100.00 |
| RCA23_c22400 | hypothetical protein                                                  |         |   | GI 8 | 100.00 | 100.00 |
| RCA23_c22410 | hypothetical protein                                                  |         |   | GI 8 | 90.61  | 88.57  |
| RCA23_c22420 | transposase                                                           | COG3316 | L | GI 8 | 1.98   | 0.00   |
| RCA23_c22430 | MORN motif precursor                                                  | COG4642 | S | GI 8 | 92.77  | 87.96  |
| RCA23_c22440 | transposase                                                           | COG3316 | L | GI 8 | 87.01  | 0.00   |
| RCA23_c22450 | hypothetical protein                                                  |         |   | GI 8 | 100.00 | 41.98  |
| RCA23_c22460 | hypothetical protein                                                  |         |   | GI 8 | 0.00   | 100.00 |
| RCA23_c22470 | hypothetical protein                                                  | COG3295 | S | GI 8 | 0.00   | 0.00   |
| RCA23_c22480 | hypothetical protein                                                  |         |   | GI 8 | 0.00   | 0.00   |
| RCA23_c22490 | hypothetical protein                                                  |         |   | GI 8 | 0.00   | 0.00   |
| RCA23_c22500 | transcriptional regulator, LuxR family                                | COG2197 | T | GI 8 | 0.00   | 0.00   |
| RCA23_c22510 | hypothetical protein                                                  | COG3316 | L | GI 8 | 0.00   | 0.00   |
| RCA23_c22520 | hypothetical protein, HTH-type transcriptional regulator, LuxR family | COG5616 | S | GI 8 | 0.00   | 43.46  |
| RCA23_c22530 | cysteine synthase CysK                                                | COG0031 | E | GI 8 | 0.00   | 23.80  |
| RCA23_c22540 | hypothetical protein                                                  |         |   | GI 8 | 0.00   | 80.00  |
| RCA23_c22550 | hypothetical protein                                                  |         |   | GI 8 | 0.00   | 0.00   |
| RCA23_c22560 | hypothetical protein                                                  |         |   | GI 8 | 43.51  | 100.00 |
| RCA23_c22570 | hypothetical protein                                                  |         |   | GI 8 | 100.00 | 98.38  |
| RCA23_c22580 | hypothetical protein                                                  | COG5470 | S | GI 8 | 100.00 | 15.00  |
| RCA23_c22590 | coniferyl aldehyde dehydrogenase CalB                                 | COG1012 | C | GI 8 | 92.50  | 91.22  |
| RCA23_c22600 | regulatory protein NocR                                               | COG0583 | K | GI 8 | 97.88  | 47.60  |
| RCA23_c22610 | sn-glycerol-3-phosphate-binding periplasmic protein UgpB              | COG1653 | G | GI 8 | 100.00 | 71.23  |
| RCA23_c22620 | sn-glycerol-3-phosphate transport system permease protein UgpA        | COG1175 | G | GI 8 | 100.00 | 100.00 |
| RCA23_c22630 | sn-glycerol-3-phosphate transport system permease protein UgpE        | COG0395 | G | GI 8 | 100.00 | 60.57  |
| RCA23_c22640 | sn-glycerol-3-phosphate import ATP-binding protein UgpC               | COG3839 | G | GI 8 | 100.00 | 30.18  |
| RCA23_c22650 | putative glycerophosphoryl diester phosphodiesterase                  | COG0584 | C | GI 8 | 86.31  | 77.10  |
| RCA23_c22660 | aerobic glycerol-3-phosphate dehydrogenase GlpD                       | COG0578 | C | GI 8 | 100.00 | 36.21  |
| RCA23_c22670 | hypothetical protein, Na <sup>+</sup> /Pi-cotransporter               | COG1283 | P | GI 8 | 90.48  | 16.94  |
| RCA23_c22680 | hypothetical protein, calcineurin-like phosphoesterase-like           | COG1409 | R | GI 8 | 100.00 | 27.78  |
| RCA23_c22690 | ABC transporter permease protein                                      | COG0395 | G | GI 8 | 95.06  | 30.25  |



|              |                                                              |         |   |      |        |        |
|--------------|--------------------------------------------------------------|---------|---|------|--------|--------|
| RCA23_c22700 | ABC transporter permease protein                             | COG1175 | G | GI 8 | 21.59  | 0.00   |
| RCA23_c22710 | ABC transporter extracellular solute-binding protein         | COG1653 | G | GI 8 | 100.00 | 0.00   |
| RCA23_c22720 | ABC transporter ATP-binding protein                          | COG3839 | G | GI 8 | 100.00 | 0.00   |
| RCA23_c22730 | HTH-type transcriptional regulator, DeoR family              | COG1349 | K | GI 8 | 100.00 | 28.92  |
| RCA23_c22740 | HAD-superfamily hydrolase, subfamily IIB                     | COG0561 | R | GI 8 | 100.00 | 33.58  |
| RCA23_c22750 | putative inner membrane transporter                          | COG0697 | G | GI 8 | 100.00 | 100.00 |
| RCA23_c22760 | soluble aldose sugar dehydrogenase YliI                      | COG2133 | G | GI 8 | 100.00 | 97.17  |
| RCA23_c22770 | putative FKBP-type peptidyl-prolyl cis-trans isomerase       | COG0545 | O | GI 8 | 75.38  | 43.59  |
| RCA23_c22780 | putative NnrU family protein                                 | COG4094 | S | GI 8 | 81.42  | 81.42  |
| RCA23_c22790 | hypothetical protein                                         |         |   | GI 8 | 98.28  | 44.44  |
| RCA23_c22800 | putative adenine methyltransferase                           | COG0863 | L | GI 8 | 52.56  | 49.53  |
| RCA23_c22810 | hypothetical protein                                         |         |   | GI 8 | 100.00 | 0.00   |
| RCA23_c22820 | phage uncharacterised protein                                | COG5410 | S | GI 8 | 40.93  | 0.00   |
| RCA23_c22830 | hypothetical protein, resolvase-like                         | COG1961 | L | GI 8 | 0.00   | 0.00   |
| RCA23_c22840 | putative prophage integrase                                  | COG0582 | L | GI 8 | 0.00   | 0.00   |
| RCA23_c22850 | hypothetical protein, putative phage-like protein            |         |   | GI 8 | 0.00   | 0.00   |
| RCA23_c22860 | hypothetical protein                                         | COG3311 | K | GI 8 | 0.00   | 0.00   |
| RCA23_c22870 | hypothetical protein                                         |         |   | GI 8 | 0.00   | 0.00   |
| RCA23_c22880 | hypothetical protein                                         |         |   | GI 8 | 54.14  | 46.50  |
| RCA23_c22890 | DNA polymerase III                                           | COG5545 | R | GI 8 | 100.00 | 89.39  |
| RCA23_c22900 | hypothetical protein, periplasmic binding protein-like       | COG2998 | H | GI 8 | 0.00   | 0.00   |
| RCA23_c22910 | hypothetical protein                                         |         |   | GI 8 | 0.00   | 81.13  |
| RCA23_c22920 | transposase                                                  | COG3316 | L | GI 8 | 0.00   | 5.37   |
| RCA23_c22930 | molybdopterin biosynthesis protein MoeA                      | COG0303 | H | GI 8 | 0.00   | 75.38  |
| RCA23_c22940 | molybdopterin-guanine dinucleotide biosynthesis protein MobB | COG1763 | H | GI 8 | 0.00   | 97.39  |
| RCA23_c22950 | hypothetical protein, MobA-like                              | COG0746 | H | GI 8 | 0.00   | 75.08  |
| RCA23_c22960 | formate dehydrogenase family accessory protein FdhD          | COG1526 | C | GI 8 | 0.00   | 96.01  |
| RCA23_c22970 | molybdopterin-converting factor subunit MoeE                 | COG0314 | H | GI 8 | 0.00   | 98.42  |
| RCA23_c22980 | molybdopterin-converting factor subunit MoeD                 | COG1977 | H | GI 8 | 0.00   | 92.68  |
| RCA23_c22990 | transposase                                                  | COG3328 | L | GI 8 | 0.00   | 100.00 |
| RCA23_c23000 | molybdenum cofactor biosynthesis protein MoeA                | COG2896 | H | GI 8 | 0.00   | 76.98  |
| RCA23_c23010 | transposase                                                  |         |   | GI 8 | 0.00   | 89.01  |
| RCA23_c23020 | ABC transporter, ATP-binding cassette protein                | COG3839 | G | GI 8 | 0.00   | 76.75  |

|              |                                                                        |         |   |      |        |        |
|--------------|------------------------------------------------------------------------|---------|---|------|--------|--------|
| RCA23_c23030 | ABC transporter, permease protein                                      | COG4662 | H | GI 8 | 0.00   | 68.37  |
| RCA23_c23040 | formate dehydrogenase, gamma subunit Fdhl                              | COG2864 | C | GI 8 | 0.00   | 97.17  |
| RCA23_c23050 | formate dehydrogenase, iron-sulfur subunit FdhB                        | COG0437 | C | GI 8 | 0.00   | 100.00 |
| RCA23_c23060 | formate dehydrogenase alpha subunit FdhA                               | COG0243 | C | GI 8 | 7.36   | 98.65  |
| RCA23_c23070 | putative twin-arginine translocation pathway signal sequence domain    |         |   | GI 8 | 100.00 | 93.23  |
| RCA23_c23080 | hypothetical protein, cytoplasmic chaperon TorD                        | COG3381 | R | GI 8 | 100.00 | 43.89  |
| RCA23_c23090 | hypothetical protein                                                   |         |   | GI 8 | 100.00 | 81.11  |
| RCA23_c23100 | putative molybdopterin-guanine dinucleotide biosynthesis protein A     |         |   | GI 8 | 47.65  | 51.60  |
| RCA23_c23110 | hypothetical protein, 4Fe-4S ferredoxin-like                           | COG1148 | C | GI 8 | 53.82  | 95.73  |
| RCA23_c23120 | hypothetical protein                                                   |         |   | GI 8 | 0.00   | 82.64  |
| RCA23_c23130 | hypothetical protein                                                   |         |   | GI 8 | 0.00   | 100.00 |
| RCA23_c23140 | hypothetical protein, Mrp/NBP35 family protein                         | COG0489 | D | GI 8 | 0.00   | 56.63  |
| RCA23_c23150 | hypothetical protein                                                   | COG0340 | H | GI 8 | 0.00   | 100.00 |
| RCA23_c23160 | hypothetical protein                                                   |         |   | GI 8 | 0.00   | 100.00 |
| RCA23_c23170 | putative phage terminase                                               |         |   | GI 8 | 0.00   | 0.00   |
| RCA23_c23180 | transposase                                                            | COG3316 | L | GI 8 | 0.00   | 0.00   |
| RCA23_c23190 | putative phage helicase                                                | COG3378 | R | GI 8 | 0.00   | 58.97  |
| RCA23_c23200 | hypothetical protein                                                   |         |   | GI 8 | 0.00   | 100.00 |
| RCA23_c23210 | putative pyridoxal 4-dehydrogenase                                     | COG0667 | C | GI 8 | 0.00   | 0.00   |
| RCA23_c23220 | 2-dehydro-3-deoxy-D-gluconate 5-dehydrogenase KduD                     | COG1028 | I | GI 8 | 0.00   | 0.00   |
| RCA23_c23230 | putative L-rhamnonate dehydratase rhamD                                | COG4948 | M | GI 8 | 0.00   | 0.00   |
| RCA23_c23240 | ureidoglycolate lyase                                                  | COG0179 | Q | GI 8 | 0.00   | 0.00   |
| RCA23_c23250 | D-3-phosphoglycerate dehydrogenase                                     | COG1052 | C | GI 8 | 0.00   | 0.00   |
| RCA23_c23260 | uncharacterized oxidoreductase                                         | COG1028 | I | GI 8 | 0.00   | 0.00   |
| RCA23_c23270 | putative rhamnose mutarotase RhaM                                      | COG3254 | S | GI 8 | 0.00   | 0.00   |
| RCA23_c23280 | putative acetoacetate decarboxylase Adc                                | COG4689 | Q | GI 8 | 0.00   | 0.00   |
| RCA23_c23290 | uncharacterized oxidoreductase                                         | COG0673 | R | GI 8 | 0.00   | 0.00   |
| RCA23_c23300 | transcriptional regulator, GntR family                                 | COG2186 | K | GI 8 | 0.00   | 0.00   |
| RCA23_c23310 | putative ribose ABC transport system, permease protein RbsC            | COG1172 | G | GI 8 | 0.00   | 0.00   |
| RCA23_c23320 | putative ribose ABC transport system, permease protein RbsC            | COG1172 | G | GI 8 | 0.00   | 0.00   |
| RCA23_c23330 | ribose import ABC transporter, ATP-binding protein RbsA                | COG1129 | G | GI 8 | 0.00   | 0.00   |
| RCA23_c23340 | putative rhamnose ABC transport system, substrate-binding protein RhaS | COG1879 | G | GI 8 | 0.00   | 0.00   |
| RCA23_c23350 | galactonate dehydratase                                                | COG4948 | M | GI 8 | 0.00   | 0.00   |

|              |                                                               |         |   |      |        |        |
|--------------|---------------------------------------------------------------|---------|---|------|--------|--------|
| RCA23_c23360 | xylose isomerase-like                                         | COG1082 | G | GI 8 | 0.00   | 0.00   |
| RCA23_c23370 | putative aldo/keto reductase                                  | COG0667 | C | GI 8 | 0.00   | 0.00   |
| RCA23_c23380 | amidohydrolase                                                | COG3618 | R | GI 8 | 0.00   | 0.00   |
| RCA23_c23390 | hypothetical protein                                          |         |   | GI 8 | 0.00   | 0.00   |
| RCA23_c23400 | transposase                                                   | COG3316 | L | GI 8 | 0.00   | 5.79   |
| RCA23_c23410 | L-rhamnose mutarotase RhaM                                    | COG3254 | S | GI 8 | 0.00   | 31.45  |
| RCA23_c23420 | ureidoglycolate lyase                                         | COG0179 | Q | GI 8 | 0.00   | 27.06  |
| RCA23_c23430 | dihydrodipicolinate synthase DapA                             | COG0329 | E | GI 8 | 0.00   | 0.00   |
| RCA23_c23440 | amidohydrolase                                                | COG3618 | R | GI 8 | 0.00   | 0.00   |
| RCA23_c23450 | 3-ketoacyl-(acyl-carrier-protein) reductase FabG              | COG1028 | I | GI 8 | 0.00   | 0.00   |
| RCA23_c23460 | L-rhamnonate dehydratase RhmD                                 | COG4948 | M | GI 8 | 0.00   | 0.00   |
| RCA23_c23470 | polyamine ABC transporter, ATP-binding protein PotA           | COG3842 | E | GI 8 | 0.00   | 0.00   |
| RCA23_c23480 | polyamine ABC transporter, permease protein                   | COG1177 | E | GI 8 | 0.00   | 0.00   |
| RCA23_c23490 | polyamine ABC transporter, permease protein                   | COG1176 | E | GI 8 | 0.00   | 0.00   |
| RCA23_c23500 | polyamine ABC transporter, substrate binding protein          | COG0687 | E | GI 8 | 0.00   | 0.00   |
| RCA23_c23510 | hypothetical protein                                          |         |   | GI 8 | 0.00   | 0.00   |
| RCA23_c23520 | hypothetical protein                                          |         |   | GI 8 | 0.00   | 0.00   |
| RCA23_c23530 | uncharacterized oxidoreductase                                | COG1028 | I | GI 8 | 55.29  | 0.00   |
| RCA23_c23540 | L-rhamnonate dehydratase                                      | COG4948 | M | GI 8 | 100.00 | 7.73   |
| RCA23_c23550 | ribose ABC transport system, permease protein RbsC            | COG1172 | G | GI 8 | 9.20   | 0.00   |
| RCA23_c23560 | ribose import ABC transporter, ATP-binding protein RbsA       | COG1129 | G | GI 8 | 0.00   | 29.44  |
| RCA23_c23570 | ribose import ABC transporter, substrate binding protein RbsC | COG1879 | G | GI 8 | 1.80   | 0.00   |
| RCA23_c23580 | HTH-type transcriptional regulator, GntR family               | COG1609 | K | GI 8 | 100.00 | 0.00   |
| RCA23_c23590 | hypothetical protein                                          | COG3311 | K | GI 8 | 100.00 | 0.00   |
| RCA23_c23600 | putative DNA-binding protein                                  | COG1396 | K | GI 8 | 0.00   | 100.00 |
| RCA23_c23610 | glutamine amidotransferase-like protein GlxB                  | COG0067 | E | GI 8 | 0.00   | 97.88  |
| RCA23_c23620 | glutamate synthase alpha subunit GlxC                         | COG0070 | E | GI 8 | 0.00   | 80.68  |
| RCA23_c23630 | glutamate synthase large subunit GlxD                         | COG0069 | E | GI 8 | 0.00   | 96.35  |
| RCA23_c23640 | glutamine synthase GlnA type III                              | COG0174 | E | GI 8 | 0.00   | 75.58  |
| RCA23_c23650 | hypothetical protein                                          |         |   | GI 8 | 0.00   | 0.00   |
| RCA23_c23660 | methyltransferase                                             | COG0863 | L | GI 8 | 42.40  | 20.00  |
| RCA23_c23670 | hypothetical protein                                          |         |   | GI 8 | 100.00 | 4.43   |
| RCA23_c23680 | putative terminase, large subunit                             | COG5410 | S | GI 8 | 94.28  | 41.63  |

|              |                                                                            |         |   |      |        |        |
|--------------|----------------------------------------------------------------------------|---------|---|------|--------|--------|
| RCA23_c23690 | hypothetical protein, DUF2924                                              |         |   | GI 8 | 0.00   | 0.00   |
| RCA23_c23700 | hypothetical protein, resolvase-like                                       | COG1961 | L | GI 8 | 9.15   | 0.00   |
| RCA23_c23720 | signal transduction histidine kinase                                       | COG0642 | T |      | 100.00 | 97.31  |
| RCA23_c23730 | mercuric reductase MerA                                                    | COG1249 | C |      | 100.00 | 99.22  |
| RCA23_c23740 | hypothetical protein                                                       | COG0398 | S |      | 100.00 | 93.31  |
| RCA23_c23750 | putative ribonuclease P                                                    | COG0594 | J |      | 100.00 | 100.00 |
| RCA23_c23760 | hypothetical protein DUF37                                                 | COG0759 | S |      | 100.00 | 100.00 |
| RCA23_c23770 | hypothetical protein                                                       |         |   |      | 100.00 | 100.00 |
| RCA23_c23780 | tRNA 2-thiocytidine biosynthesis protein TtcA                              | COG0037 | D |      | 100.00 | 100.00 |
| RCA23_c23790 | putative diguanylate phosphodiesterase                                     | COG2200 | T |      | 100.00 | 100.00 |
| RCA23_c23800 | inner membrane protein OxaA                                                | COG0706 | U |      | 100.00 | 99.50  |
| RCA23_c23810 | hypothetical protein, molybdenum cofactor sulfurase                        | COG3217 | R |      | 100.00 | 100.00 |
| RCA23_c23820 | putative GTP-binding protein EngB                                          | COG0218 | R |      | 100.00 | 100.00 |
| RCA23_c23830 | acetylglutamate kinase ArgB                                                | COG0548 | E |      | 100.00 | 100.00 |
| RCA23_c23840 | putative fatty acid hydroxylase                                            | COG3000 | I |      | 100.00 | 97.35  |
| RCA23_c23850 | hypothetical protein                                                       | COG1148 | C |      | 100.00 | 94.52  |
| RCA23_c23860 | hypothetical protein, phosphoglycerate mutase                              | COG2062 | T |      | 100.00 | 100.00 |
| RCA23_c23870 | glutamate/glutamine/aspartate/asparagine transport ATP-binding protein Bzt | COG1126 | E |      | 100.00 | 100.00 |
| RCA23_c23880 | glutamate/glutamine/aspartate/asparagine transport system permease prote   | COG0765 | E |      | 100.00 | 100.00 |
| RCA23_c23890 | glutamate/glutamine/aspartate/asparagine transport system permease prote   | COG4597 | E |      | 62.65  | 78.89  |
| RCA23_c23900 | glutamate/glutamine/aspartate/asparagine-binding protein BztA              | COG0834 | E |      | 100.00 | 98.19  |
| RCA23_c23910 | ATP chaperone protein                                                      | COG5387 | O |      | 93.48  | 100.00 |
| RCA23_c23920 | putative phosphoglycerate phosphatase                                      | COG0546 | R |      | 100.00 | 100.00 |
| RCA23_c23930 | ribosomal large subunit pseudouridine synthase C                           | COG0564 | J |      | 100.00 | 100.00 |
| RCA23_c23940 | putative ccrb-like protein                                                 | COG0239 | D |      | 100.00 | 100.00 |
| RCA23_c23950 | replication-associated recombination protein A                             | COG2256 | L |      | 100.00 | 100.00 |
| RCA23_c23960 | HTH-type transcriptional regulator, LuxR family                            | COG2197 | T |      | 100.00 | 100.00 |
| RCA23_c23970 | 50S ribosomal protein L17                                                  | COG0203 | J |      | 100.00 | 100.00 |
| RCA23_c23980 | DNA-directed RNA polymerase alpha subunit RpoA                             | COG0202 | K |      | 100.00 | 100.00 |
| RCA23_c23990 | 30S ribosomal protein S11                                                  | COG0100 | J |      | 100.00 | 100.00 |
| RCA23_c24000 | 30S ribosomal protein S13                                                  | COG0099 | J |      | 100.00 | 100.00 |
| RCA23_c24010 | adenylate kinase Adk                                                       | COG0563 | F |      | 100.00 | 99.38  |
| RCA23_c24020 | preprotein translocase subunit SecY                                        | COG0201 | U |      | 100.00 | 100.00 |

|              |                                                      |         |   |        |        |
|--------------|------------------------------------------------------|---------|---|--------|--------|
| RCA23_c24030 | 50S ribosomal protein L15                            | COG0200 | J | 100.00 | 100.00 |
| RCA23_c24040 | 50S ribosomal protein L30                            | COG1841 | J | 100.00 | 100.00 |
| RCA23_c24050 | 30S ribosomal protein S5                             | COG0098 | J | 100.00 | 100.00 |
| RCA23_c24060 | 50S ribosomal protein L18                            | COG0256 | J | 100.00 | 100.00 |
| RCA23_c24070 | 50S ribosomal protein L6                             | COG0097 | J | 100.00 | 100.00 |
| RCA23_c24080 | 30S ribosomal protein S8                             | COG0096 | J | 100.00 | 100.00 |
| RCA23_c24090 | 30S ribosomal protein S14                            | COG0199 | J | 100.00 | 100.00 |
| RCA23_c24100 | 50S ribosomal protein L5                             | COG0094 | J | 100.00 | 100.00 |
| RCA23_c24110 | 50S ribosomal protein L24                            | COG0198 | J | 100.00 | 100.00 |
| RCA23_c24120 | 50S ribosomal protein L14                            | COG0093 | J | 100.00 | 100.00 |
| RCA23_c24130 | 30S ribosomal protein S17                            | COG0186 | J | 100.00 | 100.00 |
| RCA23_c24140 | 50S ribosomal protein L29                            | COG0255 | J | 70.53  | 100.00 |
| RCA23_c24150 | hypothetical protein                                 |         |   | 71.98  | 95.65  |
| RCA23_c24160 | 50S ribosomal protein L23                            | COG0089 | J | 100.00 | 100.00 |
| RCA23_c24170 | 50S ribosomal protein L4                             | COG0088 | J | 100.00 | 100.00 |
| RCA23_c24180 | 50S ribosomal protein L3                             | COG0087 | J | 100.00 | 100.00 |
| RCA23_c24190 | 30S ribosomal protein S10                            | COG0051 | J | 100.00 | 100.00 |
| RCA23_c24200 | elongation factor Tu (EF-Tu)                         | COG0050 | J | 100.00 | 31.12  |
| RCA23_c24210 | elongation factor Fusa                               | COG0480 | J | 100.00 | 100.00 |
| RCA23_c24220 | 30S ribosomal protein S7                             | COG0049 | J | 100.00 | 100.00 |
| RCA23_c24230 | 30S ribosomal protein S12                            | COG0048 | J | 100.00 | 100.00 |
| RCA23_c24240 | hypothetical protein                                 | COG1072 | H | 100.00 | 51.54  |
| RCA23_c24250 | ABC transporter ATP-binding protein                  | COG1129 | G | 100.00 | 94.47  |
| RCA23_c24260 | ABC transporter permease protein                     | COG1172 | G | 100.00 | 100.00 |
| RCA23_c24270 | putative ABC transporter periplasmic binding protein | COG1879 | G | 100.00 | 96.82  |
| RCA23_c24280 | putative transcriptional repressor                   | COG1940 | K | 100.00 | 86.31  |
| RCA23_c24290 | hypothetical protein, acyl-CoA thioesterase-like     | COG2755 | E | 100.00 | 100.00 |
| RCA23_c24300 | ABC transporter ATP-binding protein                  | COG1136 | V | 100.00 | 100.00 |
| RCA23_c24310 | putative ABC transporter permease protein            | COG3127 | Q | 100.00 | 100.00 |
| RCA23_c24320 | hypothetical protein, glycosyl transferase family 2  | COG0463 | M | 95.78  | 100.00 |
| RCA23_c24330 | aminotransferase class-III                           | COG0161 | H | 100.00 | 100.00 |
| RCA23_c24340 | putative ectoine utilization protein EutD            | COG0006 | E | 100.00 | 100.00 |
| RCA23_c24350 | putative integral membrane protein DUF6              |         |   | 100.00 | 100.00 |

|              |                                                                  |         |   |      |        |        |
|--------------|------------------------------------------------------------------|---------|---|------|--------|--------|
| RCA23_c24360 | 4-coumarate--CoA ligase                                          | COG0318 | I |      | 100.00 | 100.00 |
| RCA23_c24370 | hypothetical protein                                             | COG0679 | R |      | 100.00 | 100.00 |
| RCA23_c24380 | hypothetical protein DUF125                                      | COG1814 | S |      | 100.00 | 100.00 |
| RCA23_c24390 | transcriptional regulator, AsnC family                           | COG1522 | K |      | 100.00 | 86.95  |
| RCA23_c24400 | arginase ArcA                                                    | COG0010 | E |      | 100.00 | 100.00 |
| RCA23_c24410 | ornithine cyclodeaminase ArcB                                    | COG2423 | E |      | 100.00 | 100.00 |
| RCA23_c24420 | bifunctional protein PutA                                        | COG4230 | C |      | 100.00 | 100.00 |
| RCA23_c24430 | hypothetical protein                                             |         |   |      | 0.00   | 100.00 |
| RCA23_c24440 | hypothetical protein                                             |         |   |      | 0.00   | 100.00 |
| RCA23_c24460 | hypothetical protein                                             |         |   |      | 100.00 | 100.00 |
| RCA23_c24450 | creatinase                                                       | COG0006 | E |      | 100.00 | 100.00 |
| RCA23_c24470 | putative hydrolase                                               | COG0596 | R |      | 95.99  | 0.00   |
| RCA23_c24480 | glycine betaine/L-proline transport system permease protein ProW | COG4176 | E |      | 100.00 | 46.78  |
| RCA23_c24490 | glycine betaine/L-proline transport ATP-binding protein ProV     | COG4175 | E |      | 19.41  | 5.59   |
| RCA23_c24500 | glycine betaine-binding periplasmic protein ProX                 | COG2113 | E |      | 13.46  | 13.87  |
| RCA23_c24510 | putative HTH-type transcriptional regluator, LysR family         | COG0583 | K |      | 100.00 | 85.20  |
| RCA23_c24520 | D-cysteine desulhydrase DcyD                                     | COG2515 | E |      | 100.00 | 100.00 |
| RCA23_c24530 | hypothetical protein                                             |         |   |      | 100.00 | 86.27  |
| RCA23_c24540 | high-affinity zinc uptake system protein ZnuA                    | COG4531 | P |      | 100.00 | 100.00 |
| RCA23_c24550 | zinc uptake regulator                                            | COG0735 | P |      | 100.00 | 100.00 |
| RCA23_c24560 | zinc import ATP-binding protein ZnuC                             | COG1121 | P |      | 100.00 | 100.00 |
| RCA23_c24570 | high-affinity zinc uptake system membrane protein ZnuB           | COG1108 | P |      | 100.00 | 100.00 |
| RCA23_c24580 | 4-hydroxyphenylpyruvate dioxygenase Hpd                          | COG3185 | E |      | 100.00 | 97.53  |
| RCA23_c24590 | hypothetical protein                                             |         |   | GI 9 | 0.00   | 83.48  |
| RCA23_c24600 | hypothetical protein                                             |         |   | GI 9 | 0.00   | 64.23  |
| RCA23_c24610 | hypothetical protein                                             | COG1028 | I | GI 9 | 21.14  | 100.00 |
| RCA23_c24620 | hypothetical protein                                             | COG1402 | R | GI 9 | 100.00 | 77.28  |
| RCA23_c24630 | putative gluconolactonase                                        | COG3386 | G | GI 9 | 100.00 | 95.04  |
| RCA23_c24640 | ribokinase RbsK                                                  | COG0524 | G | GI 9 | 100.00 | 100.00 |
| RCA23_c24650 | ribose ABC transporter protein RbsD                              | COG4154 | G | GI 9 | 100.00 | 79.69  |
| RCA23_c24660 | putative ribose ABC transporter, ATP-binding protein RbsA        | COG3839 | G | GI 9 | 100.00 | 96.72  |
| RCA23_c24670 | putative ribose ABC transporter, substrate binding protein RbsB  | COG1653 | G | GI 9 | 100.00 | 92.16  |
| RCA23_c24680 | putative ribose ABC transporter, permease protein RbsC           | COG1175 | G | GI 9 | 100.00 | 100.00 |



|              |                                                                          |         |   |      |        |        |
|--------------|--------------------------------------------------------------------------|---------|---|------|--------|--------|
| RCA23_c24690 | putative ribose ABC transporter, permease protein RbsC                   | COG0395 | G | GI 9 | 100.00 | 80.61  |
| RCA23_c24700 | hypothetical protein, L-fucose isomerase-like                            |         |   | GI 9 | 100.00 | 99.66  |
| RCA23_c24710 | sugar isomerase                                                          | COG0794 | M | GI 9 | 100.00 | 81.72  |
| RCA23_c24720 | xylulose kinase XylB                                                     | COG1070 | G | GI 9 | 24.61  | 100.00 |
| RCA23_c24730 | aminopeptidase SgcX                                                      | COG1363 | G | GI 9 | 0.00   | 86.83  |
| RCA23_c24740 | photosystem I biogenesis protein BtpA                                    | COG0434 | R | GI 9 | 0.00   | 100.00 |
| RCA23_c24750 | pyridoxal 4-dehydrogenase Pld                                            | COG0667 | C | GI 9 | 17.69  | 100.00 |
| RCA23_c24760 | putative amidohydrolase                                                  | COG3618 | R | GI 9 | 100.00 | 100.00 |
| RCA23_c24770 | putative carbohydrate kinase, pfkB family                                | COG0524 | G | GI 9 | 100.00 | 100.00 |
| RCA23_c24780 | xylose isomerase family protein                                          | COG4952 | M | GI 9 | 100.00 | 98.89  |
| RCA23_c24790 | putative HTH-type transcriptional regulator, GntR family                 | COG1802 | K | GI 9 | 100.00 | 100.00 |
| RCA23_c24800 | mandelate racemase/muconate lactonizing enzyme                           | COG4948 | M | GI 9 | 100.00 | 100.00 |
| RCA23_c24810 | fatty acid desaturase                                                    | COG3239 | I | GI 9 | 0.00   | 100.00 |
| RCA23_c24820 | hypothetical protein                                                     |         |   | GI 9 | 0.00   | 41.32  |
| RCA23_c24830 | transposase                                                              | COG3316 | L | GI 9 | 0.00   | 0.00   |
| RCA23_c24840 | transporter, LysE family                                                 | COG1280 | E | GI 9 | 0.00   | 0.00   |
| RCA23_c24850 | hypothetical protein                                                     |         |   | GI 9 | 0.00   | 68.85  |
| RCA23_c24860 | putative transporter, periplasmic binding protein                        | COG2358 | R | GI 9 | 0.00   | 0.00   |
| RCA23_c24870 | ribitol 2-dehydrogenase RbtD                                             | COG4221 | R | GI 9 | 0.00   | 0.00   |
| RCA23_c24880 | hypothetical protein                                                     |         |   | GI 9 | 0.00   | 16.00  |
| RCA23_c24890 | UDP-N-acetylglucosamine--peptide N-acetylglucosaminyltransferase 110 kDa | COG0457 | R | GI 9 | 0.00   | 24.22  |
| RCA23_c24900 | putative phage integrase                                                 | COG4974 | L | GI 9 | 100.00 | 50.82  |
| RCA23_c24920 | D-alanyl-D-alanine carboxypeptidase DacC                                 | COG1686 | M |      | 69.53  | 100.00 |
| RCA23_c24930 | thymidylate kinase Tmk                                                   | COG0125 | F |      | 100.00 | 98.54  |
| RCA23_c24940 | hypothetical protein, DNA polymerase III delta subunit                   | COG2812 | L |      | 100.00 | 100.00 |
| RCA23_c24950 | TatD family deoxyribonuclease                                            | COG0084 | L |      | 100.00 | 100.00 |
| RCA23_c24960 | hypothetical protein, metallo-beta-lactamase                             | COG1235 | R |      | 100.00 | 100.00 |
| RCA23_c24970 | membrane transport protein                                               | COG0679 | R |      | 100.00 | 88.92  |
| RCA23_c24980 | FAD dependent oxidoreductase                                             | COG0665 | E |      | 100.00 | 100.00 |
| RCA23_c24990 | UvrABC system protein B                                                  | COG0556 | L |      | 100.00 | 94.66  |
| RCA23_c25000 | hypothetical protein                                                     |         |   |      | 100.00 | 89.12  |
| RCA23_c25010 | hypothetical protein                                                     |         |   |      | 100.00 | 72.28  |
| RCA23_c25020 | hypothetical protein                                                     |         |   |      | 100.00 | 100.00 |



|              |                                                                  |         |   |        |        |
|--------------|------------------------------------------------------------------|---------|---|--------|--------|
| RCA23_c25030 | lysyl-tRNA synthase LysS                                         | COG1384 | J | 100.00 | 93.21  |
| RCA23_c25040 | hypothetical protein                                             |         |   | 100.00 | 100.00 |
| RCA23_c25050 | putative D-Ala-D-Ala carboxypeptidase 3 (S13) family protein     | COG2027 | M | 100.00 | 100.00 |
| RCA23_c25060 | hypothetical protein                                             |         |   | 100.00 | 100.00 |
| RCA23_c25070 | nicotinic acid mononucleotide adenylyltransferase NadD           | COG1057 | H | 100.00 | 100.00 |
| RCA23_c25080 | ABC transporter, ATP-binding cassette protein, ChvD family       | COG0488 | R | 100.00 | 100.00 |
| RCA23_c25090 | cold shock protein CspA                                          | COG1278 | K | 100.00 | 100.00 |
| RCA23_c25100 | glutamyl-tRNA synthase 1                                         | COG0008 | J | 100.00 | 100.00 |
| RCA23_c25110 | glutamine-dependent NAD(+) synthase NadE                         | COG0171 | H | 100.00 | 98.47  |
| RCA23_c25120 | putative phosphatidylinositol-4-phosphate 5-kinase               | COG4642 | S | 69.37  | 100.00 |
| RCA23_c25130 | hypothetical protein                                             | COG1028 | I | 100.00 | 100.00 |
| RCA23_c25140 | 2-isopropylmalate synthase LeuA                                  | COG0119 | E | 100.00 | 100.00 |
| RCA23_c25150 | rod shape-determining protein MreB                               | COG1077 | D | 100.00 | 99.33  |
| RCA23_c25160 | rod shape-determining protein MreC                               | COG1792 | M | 100.00 | 100.00 |
| RCA23_c25170 | hypothetical protein                                             |         |   | 100.00 | 96.48  |
| RCA23_c25180 | penicillin-binding protein 2                                     | COG0768 | M | 100.00 | 100.00 |
| RCA23_c25190 | rod shape-determining protein RodA                               | COG0772 | D | 100.00 | 100.00 |
| RCA23_c25200 | glyoxylate/hydroxypyruvate reductase GhrA                        | COG0111 | H | 100.00 | 100.00 |
| RCA23_c25210 | hypothetical protein                                             |         |   | 100.00 | 100.00 |
| RCA23_c25220 | hypothetical protein                                             | COG1573 | L | 100.00 | 100.00 |
| RCA23_c25230 | Na <sup>+</sup> /H <sup>+</sup> antiporter NhaA                  | COG3004 | P | 100.00 | 100.00 |
| RCA23_c25240 | capsule polysaccharide export protein KpsT                       | COG1134 | G | 100.00 | 96.36  |
| RCA23_c25250 | capsule polysaccharide export protein KpsE                       | COG3524 | M | 100.00 | 100.00 |
| RCA23_c25270 | hypothetical protein                                             | COG1832 | R | 100.00 | 100.00 |
| RCA23_c25280 | ferredoxin PetF                                                  | COG0633 | C | 100.00 | 100.00 |
| RCA23_c25290 | selenium binding protein                                         |         |   | 100.00 | 100.00 |
| RCA23_c25300 | aldehyde dehydrogenase                                           | COG1012 | C | 100.00 | 100.00 |
| RCA23_c25310 | CoA-transferase family III protein involved in DMSP degradation  | COG1804 | C | 100.00 | 100.00 |
| RCA23_c25320 | nitrogen regulatory protein P-II 2                               | COG0347 | E | 100.00 | 100.00 |
| RCA23_c25330 | ammonium transporter                                             | COG0004 | P | 100.00 | 100.00 |
| RCA23_c25340 | homoprotocatechuate degradative operon repressor                 | COG1846 | K | 100.00 | 100.00 |
| RCA23_c25350 | 5-carboxymethyl-2-hydroxymuconic semialdehyde dehydrogenase HpaE | COG1012 | C | 100.00 | 100.00 |
| RCA23_c25360 | 3,4-dihydroxyphenylacetate 2,3-dioxygenase HpaD                  | COG0346 | E | 100.00 | 100.00 |

|              |                                                                |         |   |        |        |
|--------------|----------------------------------------------------------------|---------|---|--------|--------|
| RCA23_c25370 | 3-carboxy-cis,cis-muconate cycloisomerase PcaB                 | COG0015 | F | 100.00 | 100.00 |
| RCA23_c25380 | hypothetical protein DUF849                                    | COG3246 | S | 100.00 | 100.00 |
| RCA23_c25390 | protocatechuate 3,4-dioxygenase alpha chain PcaG               | COG3485 | Q | 100.00 | 100.00 |
| RCA23_c25400 | protocatechuate 3,4-dioxygenase beta chain PcaH                | COG3485 | Q | 100.00 | 100.00 |
| RCA23_c25410 | 4-carboxymuconolactone decarboxylase PcaC                      | COG0599 | S | 100.00 | 100.00 |
| RCA23_c25420 | hypothetical protein                                           |         |   | 100.00 | 100.00 |
| RCA23_c25430 | transcriptional regulatory protein                             | COG0745 | T | 100.00 | 99.42  |
| RCA23_c25440 | two component signal transduction histidine kinase ChvG        | COG0642 | T | 100.00 | 100.00 |
| RCA23_c25450 | hypothetical protein                                           |         |   | 54.01  | 100.00 |
| RCA23_c25460 | Na(+)-phosphate symporter Pit                                  | COG0306 | P | 100.00 | 100.00 |
| RCA23_c25470 | hypothetical protein                                           |         |   | 100.00 | 100.00 |
| RCA23_c25480 | 2-dehydro-3-deoxyphosphooctonate aldolase KdsA                 | COG2877 | M | 100.00 | 100.00 |
| RCA23_c25490 | arabinose 5-phosphate isomerase KdsD                           | COG0794 | M | 100.00 | 95.21  |
| RCA23_c25500 | 3-deoxy-manno-octulosonate cytidylyltransferase KdsB           | COG1212 | M | 100.00 | 100.00 |
| RCA23_c25510 | hypothetical protein                                           |         |   | 51.69  | 66.95  |
| RCA23_c25520 | bacterial surface protein                                      |         |   | 19.09  | 34.25  |
| RCA23_c25530 | catalase-peroxidase KatG                                       | COG0376 | P | 100.00 | 100.00 |
| RCA23_c25540 | hypothetical protein                                           | COG2067 | I | 100.00 | 74.54  |
| RCA23_c25550 | thioesterase/thiol ester dehydrase-isomerase                   | COG0824 | R | 100.00 | 73.66  |
| RCA23_c25560 | iron-containing alcohol dehydrogenase                          | COG1454 | C | 100.00 | 100.00 |
| RCA23_c25570 | hypothetical protein                                           | COG1960 | I | 100.00 | 100.00 |
| RCA23_c25580 | nodulation protein N-like protein                              | COG2030 | I | 100.00 | 97.22  |
| RCA23_c25590 | putative phosphotransferase, eukaryotic acyl-CoA dehydrogenase | COG3173 | R | 100.00 | 94.81  |
| RCA23_c25600 | putative HTH-type transcriptional regulator, TetR family       | COG1309 | K | 100.00 | 100.00 |
| RCA23_c25610 | fatty acid oxidation complex alpha subunit FadJ                | COG1250 | I | 100.00 | 100.00 |
| RCA23_c25620 | acyl-CoA dehydrogenase                                         | COG1960 | I | 100.00 | 100.00 |
| RCA23_c25630 | acyl-CoA dehydrogenase                                         | COG1960 | I | 100.00 | 100.00 |
| RCA23_c25640 | hypothetical protein, MarR family                              |         |   | 100.00 | 95.44  |
| RCA23_c25650 | acyl-CoA dehydrogenase                                         | COG1960 | I | 100.00 | 100.00 |
| RCA23_c25660 | quinone oxidoreductase (1.6.5.5.)                              | COG0604 | C | 100.00 | 100.00 |
| RCA23_c25670 | hypothetical protein                                           |         |   | 100.00 | 100.00 |
| RCA23_c25680 | putative DNA repair protein RecO                               | COG1381 | L | 100.00 | 92.32  |
| RCA23_c25690 | hypothetical protein                                           | COG5447 | S | 100.00 | 100.00 |

|              |                                                                           |         |   |        |        |
|--------------|---------------------------------------------------------------------------|---------|---|--------|--------|
| RCA23_c25700 | GTP-binding protein Era                                                   | COG1159 | R | 100.00 | 100.00 |
| RCA23_c25710 | ribonuclease 3                                                            | COG0571 | K | 100.00 | 100.00 |
| RCA23_c25720 | signal peptidase I                                                        | COG0681 | U | 100.00 | 100.00 |
| RCA23_c25730 | holo-[acyl-carrier-protein] synthase AcpS                                 | COG0736 | I | 100.00 | 100.00 |
| RCA23_c25740 | pyridoxine 5'-phosphate synthase PdxJ                                     | COG0854 | H | 89.25  | 100.00 |
| RCA23_c25750 | hypothetical protein DUF2062                                              | COG3216 | S | 0.00   | 100.00 |
| RCA23_c25760 | guanosine-3',5'-bis(diphosphate) 3'-pyrophosphohydrolase SpoT             | COG0317 | T | 97.23  | 96.31  |
| RCA23_c25770 | DNA-directed RNA polymerase subunit omega                                 | COG1758 | K | 100.00 | 100.00 |
| RCA23_c25780 | putative 2-amino-4-hydroxy-6-hydroxymethylidihydropteridine pyrophosphoki | COG0801 | H | 100.00 | 96.41  |
| RCA23_c25790 | hypothetical protein DUF88                                                | COG1432 | S | 100.00 | 100.00 |
| RCA23_c25800 | 4-hydroxy-3-methylbut-2-enyl diphosphate reductase IspH                   | COG0761 | I | 100.00 | 100.00 |
| RCA23_c25810 | hypothetical protein, methyltransferase                                   | COG2227 | H | 100.00 | 100.00 |
| RCA23_c25820 | ribonuclease H                                                            | COG0328 | L | 100.00 | 100.00 |
| RCA23_c25830 | hypothetical protein                                                      |         |   | 100.00 | 100.00 |
| RCA23_c25840 | methionyl-tRNA formyltransferase Fmt                                      | COG0223 | J | 100.00 | 100.00 |
| RCA23_c25850 | peptide deformylase Def                                                   | COG0242 | J | 100.00 | 100.00 |
| RCA23_c25860 | peptide deformylase Def                                                   | COG0242 | J | 100.00 | 97.46  |
| RCA23_c25870 | aminotransferase                                                          | COG1168 | E | 100.00 | 95.20  |
| RCA23_c25880 | hypothetical protein                                                      |         |   | 100.00 | 100.00 |
| RCA23_c25890 | precorrin-4 C(11)-methyltransferase CobM                                  | COG2875 | H | 100.00 | 100.00 |
| RCA23_c25900 | precorrin-3B C(17)-methyltransferase CobJ                                 | COG1010 | H | 100.00 | 100.00 |
| RCA23_c25910 | precorrin-2 C(20)-methyltransferase CobI                                  | COG2243 | H | 100.00 | 100.00 |
| RCA23_c25920 | precorrin-6Y C(5,15)-methyltransferase CobL                               | COG2242 | H | 100.00 | 100.00 |
| RCA23_c25930 | precorrin-8X methylmutase CobH                                            | COG2082 | H | 100.00 | 100.00 |
| RCA23_c25940 | sirohdrochlorin cobaltochelataase CbiX                                    | COG2138 | S | 100.00 | 100.00 |
| RCA23_c25950 | methyltransferase, FkbM family                                            | COG3774 | M | 45.28  | 7.19   |
| RCA23_c25960 | hypothetical protein, glutathione S-transferase                           | COG0435 | O | 100.00 | 100.00 |
| RCA23_c25970 | hypothetical protein DUF1636                                              | COG5469 | S | 100.00 | 100.00 |
| RCA23_c25980 | threonine-phosphate decarboxylase CobC                                    | COG0079 | E | 100.00 | 100.00 |
| RCA23_c25990 | cobalamin biosynthesis protein CobD                                       | COG1270 | H | 100.00 | 100.00 |
| RCA23_c26000 | putative peptidoglycan-binding lytic murein transglycosylase              | COG2951 | M | 100.00 | 100.00 |
| RCA23_c26010 | putative chromosome partition protein smc                                 | COG1196 | D | 100.00 | 98.50  |
| RCA23_c26020 | hypothetical protein                                                      |         |   | 100.00 | 100.00 |

|              |                                                            |         |   |       |        |        |
|--------------|------------------------------------------------------------|---------|---|-------|--------|--------|
| RCA23_c26030 | hypothetical protein                                       | COG1028 | I | GI 10 | 100.00 | 95.56  |
| RCA23_c26040 | hypothetical protein DUF81                                 | COG0730 | R | GI 10 | 100.00 | 100.00 |
| RCA23_c26050 | 50S ribosomal protein L2                                   | COG0090 | J | GI 10 | 100.00 | 98.31  |
| RCA23_c26060 | 30S ribosomal protein S19                                  | COG0185 | J | GI 10 | 100.00 | 100.00 |
| RCA23_c26070 | 50S ribosomal protein L22                                  | COG0091 | J | GI 10 | 100.00 | 100.00 |
| RCA23_c26080 | 30S ribosomal protein S3                                   | COG0092 | J | GI 10 | 100.00 | 100.00 |
| RCA23_c26090 | 50S ribosomal protein L16                                  | COG0197 | J | GI 10 | 100.00 | 100.00 |
| RCA23_c26100 | hypothetical protein                                       |         |   | GI 10 | 100.00 | 100.00 |
| RCA23_c26120 | hypothetical protein                                       | COG0666 | R | GI 10 | 0.00   | 0.00   |
| RCA23_c26130 | transcriptional regulator                                  |         |   | GI 10 | 0.00   | 61.06  |
| RCA23_c26140 | hypothetical protein                                       |         |   | GI 10 | 0.00   | 54.41  |
| RCA23_c26150 | hypothetical protein, UPF0311                              |         |   | GI 10 | 52.81  | 100.00 |
| RCA23_c26160 | transcriptional regulator, MarR family                     | COG1846 | K | GI 10 | 100.00 | 100.00 |
| RCA23_c26170 | long-chain-fatty-acid-CoA-ligase                           | COG0318 | I | GI 10 | 100.00 | 100.00 |
| RCA23_c26180 | TRAP dicarboxylate transporter, subunit DctM               | COG1593 | G | GI 10 | 100.00 | 89.01  |
| RCA23_c26190 | TRAP dicarboxylate transporter, subunit DctQ               |         |   | GI 10 | 100.00 | 55.75  |
| RCA23_c26200 | TRAP dicarboxylate transporter, subunit DctP               | COG1638 | G | GI 10 | 100.00 | 98.36  |
| RCA23_c26210 | 3-hydroxybutyryl-CoA dehydratase Crt                       | COG1024 | I | GI 10 | 100.00 | 92.11  |
| RCA23_c26220 | metal-dependent hydrolase                                  | COG2159 | R | GI 10 | 100.00 | 94.61  |
| RCA23_c26230 | FAD dependent monooxygenase                                | COG0654 | H | GI 10 | 100.00 | 85.76  |
| RCA23_c26240 | arylsulfatase                                              | COG3119 | P | GI 10 | 100.00 | 82.21  |
| RCA23_c26250 | transcriptional regulator, MarR family                     | COG1846 | K | GI 10 | 100.00 | 58.78  |
| RCA23_c26260 | putative transporter, periplasmic binding protein          | COG2358 | R | GI 10 | 100.00 | 86.08  |
| RCA23_c26270 | TRAP transporter, 4TM/12TM fusion protein                  | COG4666 | R | GI 10 | 100.00 | 70.89  |
| RCA23_c26280 | hypothetical protein, UPF0261                              | COG5441 | S | GI 10 | 100.00 | 88.29  |
| RCA23_c26290 | gamma-glutamylputrescine synthase PuuA                     | COG0174 | E | GI 10 | 100.00 | 100.00 |
| RCA23_c26300 | cytochrome P450                                            | COG2124 | Q | GI 10 | 77.02  | 64.97  |
| RCA23_c26310 | glutamine amidotransferase class-I                         | COG0518 | F | GI 10 | 0.00   | 90.85  |
| RCA23_c26320 | tripartite tricarboxylate transporter (TTT) protein TctC   | COG3181 | S | GI 10 | 41.28  | 95.46  |
| RCA23_c26330 | tripartite tricarboxylate transporter (TTT) protein TctA   | COG3333 | S | GI 10 | 47.59  | 100.00 |
| RCA23_c26340 | hypothetical protein, transmembrane                        |         |   | GI 10 | 0.00   | 64.08  |
| RCA23_c26350 | gamma-glutamyl-gamma-aminobutyraldehyde dehydrogenase PuuC | COG1012 | C | GI 10 | 51.89  | 100.00 |
| RCA23_c26360 | hypothetical protein                                       |         |   | GI 10 | 0.00   | 0.00   |

|              |                                                                  |         |   |       |        |        |
|--------------|------------------------------------------------------------------|---------|---|-------|--------|--------|
| RCA23_c26370 | hypothetical protein                                             |         |   | GI 10 | 0.00   | 0.00   |
| RCA23_c26380 | hypothetical protein                                             |         |   | GI 10 | 0.00   | 0.00   |
| RCA23_c26390 | putative fucosyltransferase                                      |         |   | GI 10 | 0.00   | 0.00   |
| RCA23_c26400 | integrase                                                        | COG2801 | L | GI 10 | 0.00   | 91.19  |
| RCA23_c26410 | putative extracellular solute-binding protein                    | COG1840 | P | GI 10 | 96.80  | 37.21  |
| RCA23_c26420 | two-component system, sensor histidine kinase protein            | COG0642 | T | GI 10 | 100.00 | 32.90  |
| RCA23_c26430 | two-component system, response regulator protein                 | COG0745 | T | GI 10 | 100.00 | 47.68  |
| RCA23_c26440 | tripartite tricarboxylate transporter (TTT) protein TctC         | COG3181 | S | GI 10 | 80.50  | 100.00 |
| RCA23_c26450 | tripartite tricarboxylate transporter (TTT) protein TctB         |         |   | GI 10 | 100.00 | 100.00 |
| RCA23_c26460 | tripartite tricarboxylate transporter (TTT) protein TctA         | COG3333 | S | GI 10 | 100.00 | 99.07  |
| RCA23_c26470 | hypothetical protein                                             |         |   | GI 10 | 100.00 | 100.00 |
| RCA23_c26480 | hypothetical protein                                             |         |   | GI 10 | 100.00 | 100.00 |
| RCA23_c26490 | transposase A                                                    |         |   | GI 10 | 7.56   | 86.83  |
| RCA23_c26510 | hypothetical protein                                             |         |   | GI 10 | 0.00   | 0.00   |
| RCA23_c26520 | hypothetical protein                                             | COG1709 | K | GI 10 | 0.00   | 0.00   |
| RCA23_c26530 | hypothetical protein                                             |         |   | GI 10 | 0.00   | 0.00   |
| RCA23_c26540 | putative RTX toxin and hemolysin-type calcium binding protein    |         |   | GI 10 | 0.00   | 0.00   |
| RCA23_c26550 | putative RTX toxin and hemolysin-type calcium binding protein    |         |   | GI 10 | 7.47   | 5.66   |
| RCA23_c26560 | type I secretion outer membrane protein, TolC family             | COG1538 | M | GI 10 | 94.05  | 90.27  |
| RCA23_c26570 | type I secretion system ATP-binding component                    | COG2274 | V | GI 10 | 84.42  | 96.96  |
| RCA23_c26580 | type I RTX secretion system membrane fusion protein, HlyD family | COG1566 | V | GI 10 | 100.00 | 100.00 |
| RCA23_c26590 | hypothetical protein                                             |         |   | GI 10 | 100.00 | 100.00 |
| RCA23_c26600 | hypothetical protein                                             |         |   | GI 10 | 100.00 | 99.21  |
| RCA23_c26610 | hypothetical protein                                             |         |   | GI 10 | 100.00 | 100.00 |
| RCA23_c26620 | hypothetical protein                                             |         |   | GI 10 | 100.00 | 100.00 |
| RCA23_c26630 | hypothetical protein DUF2125                                     |         |   | GI 10 | 100.00 | 100.00 |
| RCA23_c26640 | Asp/Glu racemase                                                 | COG3473 | Q | GI 10 | 88.47  | 100.00 |
| RCA23_c26650 | cystathionine beta-lyase                                         | COG0626 | E | GI 10 | 100.00 | 100.00 |
| RCA23_c26660 | deoxyribodipyrimidine photo-lyase PhrB                           | COG0415 | L | GI 10 | 100.00 | 100.00 |
| RCA23_c26670 | hypothetical protein                                             | COG3380 | R | GI 10 | 100.00 | 100.00 |
| RCA23_c26680 | O-sialoglycoprotein endopeptidase Gcp                            | COG0533 | O | GI 10 | 100.00 | 100.00 |
| RCA23_c26690 | Sua5/YciO/YrdC/YwIC family protein                               | COG0009 | J | GI 10 | 100.00 | 100.00 |
| RCA23_c26700 | putative glycoprotease family protein                            | COG1214 | O | GI 10 | 100.00 | 100.00 |

|              |                                                                         |         |   |       |        |        |
|--------------|-------------------------------------------------------------------------|---------|---|-------|--------|--------|
| RCA23_c26710 | hypothetical protein UPF0079                                            | COG0802 | R | GI 10 | 100.00 | 100.00 |
| RCA23_c26720 | xylose isomerase family protein                                         | COG3622 | G | GI 10 | 31.51  | 100.00 |
| RCA23_c26730 | putative phage integrase                                                | COG0582 | L | GI 10 | 0.00   | 79.94  |
| RCA23_c26740 | hypothetical protein                                                    |         |   | GI 10 | 0.00   | 74.23  |
| RCA23_c26750 | putative prophage regulatory protein                                    | COG3311 | K | GI 10 | 0.00   | 0.00   |
| RCA23_c26760 | hypothetical protein                                                    |         |   | GI 10 | 0.00   | 0.00   |
| RCA23_c26770 | DNA polymerase                                                          | COG0749 | L | GI 10 | 0.00   | 67.34  |
| RCA23_c26780 | hypothetical protein                                                    |         |   | GI 10 | 0.00   | 0.00   |
| RCA23_c26790 | hypothetical protein, snoaL-like polyketide cyclase                     | COG5485 | R | GI 10 | 0.00   | 0.00   |
| RCA23_c26800 | hypothetical protein                                                    |         |   | GI 10 | 0.00   | 56.96  |
| RCA23_c26810 | glyoxalase/bleomycin resistance protein/dioxygenase superfamily protein |         |   | GI 10 | 0.00   | 0.00   |
| RCA23_c26820 | hypothetical protein                                                    |         |   | GI 10 | 0.00   | 16.37  |
| RCA23_c26830 | putative ABC transporter permease protein                               | COG0395 | G | GI 10 | 0.00   | 0.00   |
| RCA23_c26840 | putative ABC transporter permease protein                               | COG1175 | G | GI 10 | 0.00   | 0.00   |
| RCA23_c26850 | putative ABC transporter extracellular solute binding protein           | COG1653 | G | GI 10 | 0.00   | 0.00   |
| RCA23_c26860 | ABC transporter ATP-binding protein                                     | COG3839 | G | GI 10 | 0.00   | 0.00   |
| RCA23_c26870 | histidinol dehydrogenase HisD                                           | COG0141 | E | GI 10 | 0.00   | 0.00   |
| RCA23_c26880 | hypothetical protein, snoaL-like polyketide cyclase                     | COG5485 | R | GI 10 | 0.00   | 0.00   |
| RCA23_c26890 | short chain dehydrogenase                                               | COG1028 | I | GI 10 | 32.12  | 34.95  |
| RCA23_c26900 | putative HTH-type transcriptional regulator LacI family                 | COG1609 | K | GI 10 | 100.00 | 0.00   |
| RCA23_c26910 | hypothetical protein, snoaL-like polyketide cyclase                     |         |   | GI 10 | 30.64  | 1.00   |
| RCA23_c26920 | hypothetical protein                                                    |         |   | GI 10 | 80.64  | 23.91  |
| RCA23_c26930 | hypothetical protein, 2-hydroxypropyl-CoM lyase-like                    | COG0620 | E | GI 10 | 73.76  | 0.00   |
| RCA23_c26940 | hypothetical protein, alpha/beta hydrolase-like                         | COG0596 | R | GI 10 | 0.00   | 0.00   |
| RCA23_c26950 | hypothetical protein                                                    | COG0684 | H | GI 10 | 0.00   | 0.00   |
| RCA23_c26960 | 3-hydroxyisobutyrate dehydrogenase MmsB                                 | COG2084 | I | GI 10 | 33.55  | 11.59  |
| RCA23_c26970 | dihydroxy-acid dehydratase IlvD                                         | COG0129 | E | GI 10 | 100.00 | 36.50  |
| RCA23_c26980 | hypothetical protein                                                    | COG4091 | E | GI 10 | 33.78  | 51.45  |
| RCA23_c26990 | putative choline (or alcohol) dehydrogenase                             | COG2303 | E | GI 10 | 4.21   | 29.85  |
| RCA23_c27000 | aldehyde dehydrogenase                                                  | COG1012 | C | GI 10 | 100.00 | 76.74  |
| RCA23_c27010 | transporter, LysE family                                                | COG1280 | E | GI 10 | 100.00 | 0.17   |
| RCA23_c27020 | TRAP dicarboxylate transporter, subunit DctM                            | COG4664 | Q | GI 10 | 100.00 | 24.34  |
| RCA23_c27030 | TRAP dicarboxylate transporter, subunit DctQ                            | COG4665 | Q | GI 10 | 25.53  | 41.49  |

|              |                                                          |         |   |       |        |        |
|--------------|----------------------------------------------------------|---------|---|-------|--------|--------|
| RCA23_c27040 | TRAP dicarboxylate transporter, subunit DctP             | COG4663 | Q | GI 10 | 0.00   | 0.00   |
| RCA23_c27050 | transcriptional regulator, LysR family                   | COG0583 | K | GI 10 | 0.00   | 66.37  |
| RCA23_c27060 | mandelate racemase/muconate lactonizing enzyme           | COG4948 | M | GI 10 | 100.00 | 100.00 |
| RCA23_c27070 | Zn-dependant oxidoreductase                              | COG0604 | C | GI 10 | 56.06  | 97.66  |
| RCA23_c27090 | HTH-type transcriptional regulator, LysR family          | COG0583 | K | GI 10 | 0.00   | 70.65  |
| RCA23_c27100 | class II aldolase                                        | COG0235 | G | GI 10 | 0.00   | 29.10  |
| RCA23_c27110 | fatty acid desaturase                                    | COG3239 | I | GI 10 | 0.00   | 69.78  |
| RCA23_c27120 | 3-methyl-2-oxobutanoate hydroxymethyltransferase PanB    | COG0413 | H | GI 10 | 0.00   | 30.86  |
| RCA23_c27130 | putative rieske [2Fe-2S] protein                         | COG2146 | P | GI 10 | 0.00   | 89.00  |
| RCA23_c27150 | hypothetical protein                                     | COG1396 | K |       | 100.00 | 100.00 |
| RCA23_c27160 | arginase family protein                                  | COG0010 | E |       | 100.00 | 100.00 |
| RCA23_c27170 | hypothetical protein                                     | COG1082 | G |       | 100.00 | 100.00 |
| RCA23_c27180 | putative HTH-type transcriptional regulator, AraC family | COG2169 | F |       | 100.00 | 100.00 |
| RCA23_c27190 | hypothetical protein. fatty acid desaturase              | COG3239 | I |       | 100.00 | 100.00 |
| RCA23_c27200 | AMP-dependent synthase / ligase                          | COG0318 | I |       | 100.00 | 100.00 |
| RCA23_c27210 | ABC transporter ATP-binding protein                      | COG1132 | V |       | 100.00 | 100.00 |
| RCA23_c27220 | spore coat family protein                                |         |   |       | 100.00 | 100.00 |
| RCA23_c27230 | PapD-like chaperone involved in fimbrial biogenesis      | COG3121 | N |       | 100.00 | 100.00 |
| RCA23_c27240 | fimbrial biogenesis outer membrane usher protein         | COG3188 | N |       | 100.00 | 100.00 |
| RCA23_c27250 | fimbrial biogenesis outer membrane usher protein         | COG3188 | N |       | 100.00 | 100.00 |
| RCA23_c27260 | hypothetical protein                                     |         |   |       | 100.00 | 100.00 |
| RCA23_c27280 | hypothetical protein                                     | COG0697 | G |       | 100.00 | 100.00 |
| RCA23_c27290 | DNA-directed RNA polymerase beta subunit RpoC            | COG0086 | K |       | 86.33  | 100.00 |
| RCA23_c27300 | DNA-directed RNA polymerase beta subunit RpoB            | COG0085 | K |       | 100.00 | 100.00 |
| RCA23_c27310 | 50S ribosomal protein L7/L12                             | COG0222 | J |       | 100.00 | 100.00 |
| RCA23_c27320 | 50S ribosomal protein L10                                | COG0244 | J |       | 100.00 | 100.00 |
| RCA23_c27330 | 50S ribosomal protein L1                                 | COG0081 | J |       | 100.00 | 100.00 |
| RCA23_c27340 | 50S ribosomal protein L11                                | COG0080 | J |       | 100.00 | 100.00 |
| RCA23_c27350 | transcription antitermination protein NusG               | COG0250 | K |       | 100.00 | 100.00 |
| RCA23_c27360 | preprotein translocase, subunit SecE                     | COG0690 | U |       | 100.00 | 100.00 |
| RCA23_c27370 | hypothetical protein                                     |         |   |       | 100.00 | 100.00 |
| RCA23_c27430 | hypothetical protein                                     |         |   |       | 100.00 | 100.00 |
| RCA23_c27440 | hypothetical protein, transmembrane                      |         |   |       | 100.00 | 100.00 |



|              |                                                        |         |   |        |        |
|--------------|--------------------------------------------------------|---------|---|--------|--------|
| RCA23_c27450 | hypothetical protein                                   |         |   | 74.48  | 100.00 |
| RCA23_c27460 | putative acetolactate synthase isozyme 1 large subunit | COG0028 | E | 100.00 | 100.00 |
| RCA23_c27470 | putative cation transporter                            | COG0168 | P | 100.00 | 100.00 |
| RCA23_c27480 | GTP cyclohydrolase FoE                                 | COG1469 | S | 100.00 | 100.00 |
| RCA23_c27490 | O-succinylhomoserine sulfhydrylase MetZ                | COG0626 | E | 100.00 | 100.00 |
| RCA23_c27500 | hypothetical protein                                   | COG0625 | O | 100.00 | 100.00 |
| RCA23_c27510 | putative intracellular septation protein               | COG2917 | D | 100.00 | 99.00  |
| RCA23_c27520 | hypothetical protein                                   | COG0697 | G | 100.00 | 100.00 |
| RCA23_c27530 | putative cell division protein                         | COG0552 | U | 100.00 | 100.00 |
| RCA23_c27540 | NADH-quinone oxidoreductase subunits E/F (fused)       | COG1894 | C | 100.00 | 100.00 |
| RCA23_c27550 | exodeoxyribonuclease 7 large subunit XseA              | COG1570 | L | 100.00 | 100.00 |
| RCA23_c27560 | phosphoribosylamine--glycine ligase PurD               | COG0151 | F | 100.00 | 93.19  |
| RCA23_c27570 | hypothetical protein, ferredoxin                       | COG0633 | C | 100.00 | 100.00 |
| RCA23_c27580 | hypothetical protein                                   | COG0587 | L | 100.00 | 100.00 |
| RCA23_c27590 | periplasmic serine protease DO-like                    | COG0265 | O | 100.00 | 100.00 |
| RCA23_c27600 | putative protein hflC                                  | COG0330 | O | 100.00 | 100.00 |
| RCA23_c27610 | protein HflK                                           | COG0330 | O | 100.00 | 100.00 |
| RCA23_c27620 | glutathione reductase Gor                              | COG1249 | C | 100.00 | 100.00 |
| RCA23_c27630 | ribose-5-phosphate isomerase A                         | COG0120 | G | 100.00 | 100.00 |
| RCA23_c27640 | hypothetical protein                                   |         |   | 100.00 | 100.00 |
| RCA23_c27650 | L-serine dehydratase SdaB                              | COG1760 | E | 100.00 | 99.49  |
| RCA23_c27660 | putative integral membrane protein                     | COG0697 | G | 100.00 | 100.00 |
| RCA23_c27670 | hypothetical protein, thiamine pyrophosphokinase       | COG1564 | H | 100.00 | 100.00 |
| RCA23_c27680 | hypothetical protein                                   |         |   | 100.00 | 100.00 |
| RCA23_c27690 | hypothetical protein                                   |         |   | 100.00 | 89.18  |
| RCA23_c27700 | hypothetical protein                                   |         |   | 100.00 | 100.00 |
| RCA23_c27710 | adenylosuccinate synthase PurA                         | COG0104 | F | 100.00 | 100.00 |
| RCA23_c27720 | preprotein translocase, SecE subunit SecE              |         |   | 100.00 | 100.00 |
| RCA23_c27730 | CTP synthase                                           | COG0504 | F | 100.00 | 100.00 |
| RCA23_c27740 | hypothetical protein, DUF1330                          | COG5470 | S | 100.00 | 94.90  |
| RCA23_c27750 | hypothetical protein DUF1332                           | COG4103 | S | 100.00 | 100.00 |
| RCA23_c27760 | hypothetical protein                                   | COG3221 | P | 100.00 | 100.00 |
| RCA23_c27770 | amino acid transport ATP-binding protein               | COG4598 | E | 100.00 | 100.00 |

|              |                                                                             |         |   |        |        |
|--------------|-----------------------------------------------------------------------------|---------|---|--------|--------|
| RCA23_c27780 | putative amino acid transport extracellular solute binding protein          | COG0834 | E | 100.00 | 100.00 |
| RCA23_c27790 | putative ABC transporter inner membrane component                           | COG4215 | E | 100.00 | 100.00 |
| RCA23_c27800 | putative amino acid transport permease protein                              | COG4160 | E | 100.00 | 100.00 |
| RCA23_c27810 | gamma-glutamylputrescine synthase PuuA                                      | COG0174 | E | 100.00 | 98.51  |
| RCA23_c27820 | hypothetical protein, glutamine amidotransferase class I                    | COG0518 | F | 100.00 | 100.00 |
| RCA23_c27830 | gamma-glutamylputrescine synthase PuuA                                      | COG0174 | E | 100.00 | 100.00 |
| RCA23_c27840 | gamma-glutamylputrescine oxidoreductase PuuB                                | COG0665 | E | 100.00 | 97.62  |
| RCA23_c27850 | aminotransferase class III                                                  | COG0161 | H | 100.00 | 100.00 |
| RCA23_c27860 | putative PHB synthesis repressor protein                                    | COG5394 | S | 100.00 | 100.00 |
| RCA23_c27870 | hypothetical protein                                                        |         |   | 100.00 | 100.00 |
| RCA23_c27880 | poly(R)-hydroxyalkanoic acid synthase PhaC                                  | COG3243 | I | 100.00 | 100.00 |
| RCA23_c27890 | polyhydroxyalkanoate depolymerase PhaZ                                      | COG4553 | I | 98.97  | 99.60  |
| RCA23_c27900 | putative ribosome biogenesis GTPase RsgA                                    | COG1162 | R | 100.00 | 100.00 |
| RCA23_c27910 | hypothetical protein, alpha/beta hydrolase-like                             | COG0596 | R | 100.00 | 100.00 |
| RCA23_c27920 | hypothetical protein                                                        |         |   | 100.00 | 100.00 |
| RCA23_c27930 | hypothetical protein, alpha/beta hydrolase-like                             | COG0596 | R | 100.00 | 100.00 |
| RCA23_c27940 | threonyl-tRNA synthase ThrS                                                 | COG0441 | J | 100.00 | 95.74  |
| RCA23_c27950 | hypothetical protein, ArsC                                                  | COG1393 | P | 100.00 | 100.00 |
| RCA23_c27960 | thymidylate synthase                                                        | COG1351 | F | 100.00 | 100.00 |
| RCA23_c27970 | putative glyoxalase/bleomycin resistance protein/dioxygenase superfamily pr | COG0346 | E | 100.00 | 100.00 |
| RCA23_c27980 | hypothetical protein                                                        |         |   | 100.00 | 100.00 |
| RCA23_c27990 | putative transcriptional regulator marR family                              | COG1846 | K | 100.00 | 100.00 |
| RCA23_c28000 | hypothetical protein DUF339                                                 | COG2938 | S | 100.00 | 100.00 |
| RCA23_c28010 | hypothetical protein, DNA binding                                           | COG1813 | K | 100.00 | 100.00 |
| RCA23_c28020 | aspartate aminotransferase AatA                                             | COG0436 | E | 100.00 | 100.00 |
| RCA23_c28030 | hypothetical protein                                                        |         |   | 100.00 | 100.00 |
| RCA23_c28040 | multidrug resistance protein NorM                                           | COG0534 | V | 100.00 | 100.00 |
| RCA23_c28050 | DNA topoisomerase 4 subunit B                                               | COG0187 | L | 100.00 | 100.00 |
| RCA23_c28060 | hypothetical protein                                                        | COG3238 | S | 100.00 | 100.00 |
| RCA23_c28070 | putative malate/L-lactate dehydrogenase                                     | COG2055 | C | 100.00 | 99.90  |
| RCA23_c28080 | lipoprotein-releasing system ATP-binding protein LolD                       | COG1136 | V | 100.00 | 100.00 |
| RCA23_c28090 | lipoprotein-releasing system transmembrane protein, lolC/E family           | COG4591 | M | 100.00 | 100.00 |
| RCA23_c28100 | prolyl-tRNA synthase ProS                                                   | COG0442 | J | 100.00 | 100.00 |

|              |                                                                |         |   |        |        |
|--------------|----------------------------------------------------------------|---------|---|--------|--------|
| RCA23_c28110 | hypothetical protein DUF20                                     | COG0628 | R | 100.00 | 100.00 |
| RCA23_c28120 | hypothetical protein                                           | COG0593 | L | 100.00 | 100.00 |
| RCA23_c28130 | polyphosphate kinase Ppk                                       | COG0855 | P | 100.00 | 100.00 |
| RCA23_c28140 | putative phosphatase                                           | COG0248 | F | 100.00 | 99.16  |
| RCA23_c28150 | hypothetical protein, DnaJ                                     | COG1076 | O | 100.00 | 100.00 |
| RCA23_c28160 | hypothetical protein                                           |         |   | 100.00 | 100.00 |
| RCA23_c28170 | methylmalonyl-CoA mutase McmA                                  | COG1884 | I | 100.00 | 100.00 |
| RCA23_c28180 | hypothetical protein                                           |         |   | 100.00 | 100.00 |
| RCA23_c28190 | biotin carboxylase AccC                                        | COG4770 | I | 100.00 | 100.00 |
| RCA23_c28200 | hypothetical protein                                           |         |   | 100.00 | 100.00 |
| RCA23_c28210 | propionyl-CoA carboxylase beta chain, mitochondrial precursor  | COG4799 | I | 100.00 | 100.00 |
| RCA23_c28220 | putative major facilitator superfamily transporter             | COG2814 | G | 100.00 | 100.00 |
| RCA23_c28230 | hypothetical protein                                           | COG3800 | R | 100.00 | 100.00 |
| RCA23_c28240 | betaine aldehyde dehydrogenase BetB                            | COG1012 | C | 100.00 | 100.00 |
| RCA23_c28250 | hypothetical protein                                           | COG0697 | G | 100.00 | 100.00 |
| RCA23_c28260 | TRAP dicarboxylate transporter, subunit DctM                   | COG1593 | G | 100.00 | 98.72  |
| RCA23_c28270 | TRAP dicarboxylate transporter, subunit DctQ                   | COG4665 | Q | 100.00 | 87.46  |
| RCA23_c28280 | TRAP dicarboxylate transporter, subunit DctP                   | COG1638 | G | 100.00 | 100.00 |
| RCA23_c28290 | transcriptional regulator, LacI family                         | COG1609 | K | 100.00 | 100.00 |
| RCA23_c28300 | hypothetical protein, DUF81 family                             | COG0730 | R | 100.00 | 100.00 |
| RCA23_c28310 | serine--glyoxylate aminotransferase SgaA                       | COG0075 | E | 100.00 | 99.66  |
| RCA23_c28320 | D-lactate dehydrogenase Dld                                    | COG0277 | C | 100.00 | 90.09  |
| RCA23_c28330 | hypothetical protein                                           |         |   | 100.00 | 79.22  |
| RCA23_c28340 | AMP-binding enzyme                                             | COG0318 | I | 100.00 | 80.01  |
| RCA23_c28350 | succinate-semialdehyde dehydrogenase SucD                      | COG1012 | C | 100.00 | 100.00 |
| RCA23_c28360 | hypothetical protein                                           | COG3333 | S | 100.00 | 100.00 |
| RCA23_c28370 | hypothetical protein                                           |         |   | 100.00 | 100.00 |
| RCA23_c28380 | putative tripartite tricarboxylate transporter family receptor | COG3181 | S | 18.15  | 89.84  |
| RCA23_c28390 | putative ETC complex I subunit                                 |         |   | 100.00 | 100.00 |
| RCA23_c28450 | sulfoxide reductase heme-binding subunit YedZ                  | COG2717 | S | 100.00 | 100.00 |
| RCA23_c28460 | sulfoxide reductase catalytic subunit YedY                     | COG2041 | R | 100.00 | 100.00 |
| RCA23_c28470 | 3-oxoacyl-[acyl-carrier-protein] reductase FabG                | COG1028 | I | 100.00 | 100.00 |
| RCA23_c28480 | putative haloacid dehalogenase-like hydrolase                  | COG0637 | R | 100.00 | 100.00 |

|              |                                                                         |         |   |        |        |
|--------------|-------------------------------------------------------------------------|---------|---|--------|--------|
| RCA23_c28490 | chaperone protein ClpB                                                  | COG0542 | O | 100.00 | 100.00 |
| RCA23_c28500 | orotidine 5'-phosphate decarboxylase PyrF                               | COG0284 | F | 100.00 | 100.00 |
| RCA23_c28510 | hypothetical protein                                                    |         |   | 100.00 | 100.00 |
| RCA23_c28520 | SPFH domain/band 7 family protein                                       | COG0330 | O | 100.00 | 100.00 |
| RCA23_c28530 | DNA polymerase IV                                                       | COG0389 | L | 100.00 | 100.00 |
| RCA23_c28540 | putative N-formylglutamate amidohydrolase                               | COG3741 | E | 100.00 | 100.00 |
| RCA23_c28560 | hypothetical protein, phenylacetate-coenzyme A ligase                   | COG1541 | H | 100.00 | 100.00 |
| RCA23_c28570 | high-affinity branched-chain amino acid transporter ATP-binding protein | COG0410 | E | 100.00 | 99.64  |
| RCA23_c28580 | hypothetical protein                                                    | COG0683 | E | 100.00 | 57.30  |
| RCA23_c28590 | high-affinity branched-chain amino acid transporter permease protein    | COG4177 | E | 100.00 | 71.22  |
| RCA23_c28600 | high-affinity branched-chain amino acid transporter permease protein    | COG0559 | E | 100.00 | 90.82  |
| RCA23_c28610 | high-affinity branched-chain amino acid transporter ATP-binding protein | COG0411 | E | 100.00 | 100.00 |
| RCA23_c28620 | putative long-chain-fatty-acid-CoA ligase                               | COG1022 | I | 100.00 | 100.00 |
| RCA23_c28630 | tRNA pseudouridine synthase B                                           | COG0130 | J | 100.00 | 100.00 |
| RCA23_c28650 | ribosome-binding factor A                                               | COG0858 | J | 100.00 | 100.00 |
| RCA23_c28640 | dihydrodipicolinate synthase DapA                                       | COG0289 | E | 100.00 | 100.00 |
| RCA23_c28660 | hypothetical protein DUF1674                                            | COG5508 | S | 100.00 | 100.00 |
| RCA23_c28670 | putative ribosomal RNA small subunit methyltransferase B                | COG0144 | J | 100.00 | 100.00 |
| RCA23_c28680 | hypothetical protein, heparinase II/III                                 | COG5360 | S | 79.28  | 100.00 |
| RCA23_c28690 | bifunctional purine biosynthesis protein PurH                           | COG0138 | F | 100.00 | 93.76  |
| RCA23_c28700 | signal peptidase II                                                     | COG0597 | M | 100.00 | 100.00 |
| RCA23_c28710 | uncharacterized zinc protease y4wA                                      | COG0612 | R | 100.00 | 100.00 |
| RCA23_c28720 | uncharacterized zinc protease y4wB                                      | COG0612 | R | 100.00 | 100.00 |
| RCA23_c28730 | DNA mismatch repair protein MutL                                        | COG0323 | L | 100.00 | 100.00 |
| RCA23_c28740 | putative RmuC family protein                                            | COG1322 | S | 100.00 | 100.00 |
| RCA23_c28750 | transcriptional activator ChrR                                          | COG3806 | T | 100.00 | 100.00 |
| RCA23_c28760 | RNA polymerase sigma factor SigK                                        | COG1595 | K | 100.00 | 100.00 |
| RCA23_c28770 | hypothetical protein                                                    | COG2907 | R | 100.00 | 100.00 |
| RCA23_c28780 | hypothetical protein DUF1365                                            | COG3496 | S | 100.00 | 100.00 |
| RCA23_c28790 | hypothetical protein                                                    | COG2211 | G | 100.00 | 100.00 |
| RCA23_c28800 | hypothetical protein                                                    |         |   | 100.00 | 100.00 |
| RCA23_c28810 | putative short chain dehydrogenase                                      | COG4221 | R | 100.00 | 100.00 |
| RCA23_c28820 | saccharopine dehydrogenase (NAD <sup>+</sup> ,L-lysine-forming)         | COG3288 | C | 100.00 | 99.34  |

|              |                                                   |         |   |        |        |
|--------------|---------------------------------------------------|---------|---|--------|--------|
| RCA23_c28830 | putative glutathione S-transferase                | COG0625 | O | 100.00 | 100.00 |
| RCA23_c28840 | putative phosphoglycerate mutase family protein   | COG0406 | G | 100.00 | 100.00 |
| RCA23_c28850 | formate dehydrogenase Fdh                         | COG3383 | R | 100.00 | 100.00 |
| RCA23_c28860 | hypothetical protein                              | COG1357 | S | 75.52  | 54.92  |
| RCA23_c28870 | hypothetical protein DUF1643                      | COG4333 | S | 100.00 | 100.00 |
| RCA23_c28880 | haloacetate dehalogenase DehH                     | COG0596 | R | 100.00 | 100.00 |
| RCA23_c28890 | 30S ribosomal protein S15                         | COG0184 | J | 100.00 | 100.00 |
| RCA23_c28900 | hypothetical protein, DUF6 transmembrane protein  | COG0697 | G | 100.00 | 100.00 |
| RCA23_c28910 | polyribonucleotide nucleotidyltransferase Pnp     | COG1185 | J | 100.00 | 100.00 |
| RCA23_c28920 | aldehyde dehydrogenase                            | COG1012 | C | 97.85  | 100.00 |
| RCA23_c28930 | ribosomal large subunit pseudouridine synthase A  | COG0564 | J | 100.00 | 96.43  |
| RCA23_c28940 | protein OtnG                                      |         |   | 100.00 | 99.37  |
| RCA23_c28950 | hypothetical protein, DUF940 putative lipoprotein |         |   | 27.08  | 100.00 |
| RCA23_c28960 | hypothetical protein                              |         |   | 100.00 | 100.00 |
| RCA23_c28970 | UDP-glucose 4-epimerase GalE                      | COG1087 | M | 100.00 | 100.00 |
| RCA23_c28980 | putative FAD linked oxidase                       | COG0277 | C | 100.00 | 100.00 |
| RCA23_c28990 | signal recognition particle protein Ffh           | COG0541 | U | 100.00 | 96.66  |
| RCA23_c29000 | putative chorismate mutase type II                | COG1605 | E | 100.00 | 100.00 |
| RCA23_c29010 | 30S ribosomal protein S16                         | COG0228 | J | 100.00 | 100.00 |
| RCA23_c29020 | ribosome maturation factor RimM                   | COG0806 | J | 100.00 | 100.00 |
| RCA23_c29030 | tRNA (guanine-N(1)-)-methyltransferase TrmD       | COG0336 | J | 100.00 | 100.00 |
| RCA23_c29040 | 50S ribosomal protein L19                         | COG0335 | J | 100.00 | 100.00 |
| RCA23_c29050 | 50S ribosomal protein L31                         | COG0254 | J | 100.00 | 100.00 |
| RCA23_c29060 | ATPase MipZ                                       | COG1192 | D | 100.00 | 100.00 |
| RCA23_c29070 | fructokinase                                      | COG0524 | G | 100.00 | 100.00 |
| RCA23_c29080 | P-hydroxybenzoate hydroxylase PobA                | COG0654 | H | 100.00 | 98.64  |
| RCA23_c29090 | kynureninase KynU                                 | COG3844 | E | 100.00 | 100.00 |
| RCA23_c29100 | HTH-type transcriptional regulator, GntR family   | COG1802 | K | 100.00 | 100.00 |
| RCA23_c29110 | hypothetical protein, glutathione S-transferase   | COG0625 | O | 100.00 | 100.00 |
| RCA23_c29120 | L-threonine 3-dehydrogenase                       | COG0451 | M | 100.00 | 100.00 |
| RCA23_c29130 | enoyl-CoA hydratase                               | COG1024 | I | 100.00 | 100.00 |
| RCA23_c29140 | enoyl-CoA hydratase                               | COG1250 | I | 100.00 | 98.59  |
| RCA23_c29150 | 3-hydroxyacyl-CoA dehydrogenase FadN              | COG1028 | I | 100.00 | 100.00 |

|              |                                                                 |         |   |        |        |
|--------------|-----------------------------------------------------------------|---------|---|--------|--------|
| RCA23_c29160 | hypothetical protein                                            |         |   | 90.85  | 100.00 |
| RCA23_c29170 | integrase                                                       | COG4974 | L | 100.00 | 100.00 |
| RCA23_c29180 | hypothetical protein, porin-like                                |         |   | 100.00 | 73.20  |
| RCA23_c29190 | leucyl-tRNA synthase LeuS                                       | COG0495 | J | 100.00 | 100.00 |
| RCA23_c29200 | hypothetical protein DUF2159                                    |         |   | 100.00 | 100.00 |
| RCA23_c29210 | hypothetical protein                                            |         |   | 100.00 | 100.00 |
| RCA23_c29220 | hypothetical protein, glutathione S-transferase                 | COG0625 | O | 100.00 | 100.00 |
| RCA23_c29230 | hypothetical protein                                            | COG2081 | R | 100.00 | 100.00 |
| RCA23_c29240 | hypothetical protein, porin                                     |         |   | 100.00 | 59.27  |
| RCA23_c29250 | hypothetical protein, alanine racemase-like                     | COG0325 | R | 100.00 | 100.00 |
| RCA23_c29260 | hypothetical protein, YkuD                                      | COG3786 | S | 100.00 | 100.00 |
| RCA23_c29270 | GTP cyclohydrolase II RibA                                      | COG0807 | H | 100.00 | 100.00 |
| RCA23_c29280 | response regulator receiver protein                             | COG0745 | T | 100.00 | 100.00 |
| RCA23_c29290 | 2-oxo-hepta-3-ene-1,7-dioic acid hydratase HpcG                 | COG3971 | Q | 100.00 | 100.00 |
| RCA23_c29300 | fumarylacetoacetate hydrolase family protein                    | COG0179 | Q | 100.00 | 100.00 |
| RCA23_c29310 | 5-carboxymethyl-2-hydroxymuconate isomerase                     | COG3232 | E | 100.00 | 100.00 |
| RCA23_c29320 | homoprotocatechuate degradation operon regulator HpaR           | COG1846 | K | 100.00 | 100.00 |
| RCA23_c29330 | 4-hydroxyphenylacetate 3-monooxygenase oxygenase component HpaH | COG2368 | Q | 100.00 | 98.22  |
| RCA23_c29340 | ABC sugar transporter, ATPase subunit                           | COG3839 | G | 100.00 | 100.00 |
| RCA23_c29350 | mannitol 2-dehydrogenase MtlK                                   | COG0246 | G | 100.00 | 99.22  |
| RCA23_c29360 | transcriptional regulator, AraC family                          | COG2207 | K | 100.00 | 100.00 |
| RCA23_c29370 | ABC sugar transporter, permease protein                         | COG0395 | G | 100.00 | 100.00 |
| RCA23_c29380 | ABC sugar transporter, permease protein                         | COG1175 | G | 100.00 | 72.95  |
| RCA23_c29390 | ABC transporter, periplasmic substrate-binding protein          | COG1653 | G | 100.00 | 95.16  |
| RCA23_c29400 | putative flavohemoglobin / bacterial hemoglobin                 | COG1017 | C | 0.00   | 73.22  |
| RCA23_c29410 | hypothetical protein                                            |         |   | 0.00   | 100.00 |
| RCA23_c29420 | Na <sup>+</sup> /H <sup>+</sup> antiporter NhaA                 | COG3004 | P | 0.00   | 98.75  |
| RCA23_c29430 | hypothetical protein                                            |         |   | 3.54   | 100.00 |
| RCA23_c29440 | hypothetical protein DUF55                                      | COG2947 | S | 100.00 | 100.00 |
| RCA23_c29450 | protein Ycil                                                    | COG2350 | S | 100.00 | 100.00 |
| RCA23_c29460 | glycerol-3-phosphate dehydrogenase GpsA                         | COG0240 | C | 100.00 | 100.00 |
| RCA23_c29470 | hypothetical protein, uroporphyrinogen-III synthase HemD        | COG1587 | H | 100.00 | 99.86  |
| RCA23_c29480 | hypothetical protein                                            | COG3264 | M | 100.00 | 100.00 |

|              |                                                                        |         |   |        |        |
|--------------|------------------------------------------------------------------------|---------|---|--------|--------|
| RCA23_c29490 | hypothetical protein, HemY                                             | COG3898 | S | 100.00 | 100.00 |
| RCA23_c29500 | transcriptional regulatory protein, Ars family                         | COG0640 | K | 100.00 | 100.00 |
| RCA23_c29510 | magnesium-chelatase subunit BchO                                       | COG0596 | R | 100.00 | 100.00 |
| RCA23_c29520 | magnesium-chelatase subunit BchD                                       | COG1240 | H | 100.00 | 98.79  |
| RCA23_c29530 | magnesium-chelatase subunit BchI                                       | COG1239 | H | 100.00 | 100.00 |
| RCA23_c29540 | spheroidene monooxygenase CrtA                                         |         |   | 100.00 | 100.00 |
| RCA23_c29550 | phytoene dehydrogenase CrtI                                            | COG1233 | Q | 100.00 | 100.00 |
| RCA23_c29560 | phytoene synthase CrtB                                                 | COG1562 | I | 100.00 | 100.00 |
| RCA23_c29570 | hydroxyneurosporene dehydrogenase CrtC                                 |         |   | 100.00 | 84.93  |
| RCA23_c29580 | methoxyneurosporene dehydrogenase CrtD                                 | COG1233 | Q | 100.00 | 100.00 |
| RCA23_c29590 | geranylgeranyl pyrophosphate synthase CrtE                             | COG0142 | H | 100.00 | 91.37  |
| RCA23_c29600 | hydroxyneurosporene methyltransferase CrtF                             |         |   | 100.00 | 100.00 |
| RCA23_c29610 | 2-desacetyl-2-hydroxyethyl bacteriochlorophyllide A dehydrogenase BchC | COG1063 | E | 100.00 | 100.00 |
| RCA23_c29620 | chlorophyllide reductase BchX                                          | COG1348 | P | 100.00 | 100.00 |
| RCA23_c29630 | chlorophyllide reductase BchY                                          |         |   | 100.00 | 100.00 |
| RCA23_c29640 | chlorophyllide reductase subunit BchZ                                  | COG2710 | C | 100.00 | 99.38  |
| RCA23_c29650 | protein PufQ                                                           |         |   | 100.00 | 100.00 |
| RCA23_c29660 | light-harvesting protein B-870 beta chain PufB                         |         |   | 100.00 | 100.00 |
| RCA23_c29670 | light-harvesting protein B-870 alpha chain PufA                        |         |   | 100.00 | 100.00 |
| RCA23_c29680 | reaction center protein L chain PufL                                   |         |   | 100.00 | 100.00 |
| RCA23_c29690 | reaction center protein M chain PufM                                   |         |   | 100.00 | 100.00 |
| RCA23_c29700 | protein PufX                                                           |         |   | 100.00 | 100.00 |
| RCA23_c29710 | 1-deoxy-D-xylulose-5-phosphate synthase Dxs                            | COG1154 | H | 100.00 | 100.00 |
| RCA23_c29720 | isopentenyl-diphosphate delta-isomerase Idi                            | COG1443 | I | 100.00 | 100.00 |
| RCA23_c29730 | geranylgeranyl reductase BchP                                          | COG0644 | C | 100.00 | 100.00 |
| RCA23_c29740 | bacteriochlorophyll synthase 44.5 kDa chain                            |         |   | 100.00 | 100.00 |
| RCA23_c29750 | bacteriochlorophyll synthase BchG                                      | COG0382 | H | 100.00 | 100.00 |
| RCA23_c29760 | cytochrome c-551                                                       | COG3474 | C | 100.00 | 100.00 |
| RCA23_c29770 | uroporphyrinogen decarboxylase HemE                                    | COG0407 | H | 100.00 | 100.00 |
| RCA23_c29780 | porphobilinogen deaminase HemC                                         | COG0181 | H | 100.00 | 100.00 |
| RCA23_c29790 | hypothetical protein, NmrA-like                                        | COG0702 | M | 100.00 | 90.83  |
| RCA23_c29800 | 5-aminolevulinate synthase HemA                                        | COG0156 | H | 99.67  | 100.00 |
| RCA23_c29810 | hypothetical protein                                                   |         |   | 43.99  | 100.00 |



|              |                                                                              |         |   |        |        |
|--------------|------------------------------------------------------------------------------|---------|---|--------|--------|
| RCA23_c29820 | aerobic Mg-protoporphyrin IX monomethyl ester oxidative cyclase AcsF         |         |   | 100.00 | 100.00 |
| RCA23_c29830 | hypothetical protein                                                         |         |   | 100.00 | 100.00 |
| RCA23_c29840 | hypothetical protein                                                         |         |   | 100.00 | 100.00 |
| RCA23_c29850 | hypothetical protein                                                         |         |   | 90.92  | 100.00 |
| RCA23_c29860 | reaction center protein PuhA                                                 |         |   | 22.87  | 100.00 |
| RCA23_c29870 | protein PucC                                                                 |         |   | 100.00 | 100.00 |
| RCA23_c29880 | magnesium-protoporphyrin O-methyltransferase BchM                            | COG2227 | H | 100.00 | 100.00 |
| RCA23_c29890 | light-independent protochlorophyllide reductase iron-sulfur ATP-binding prot | COG1348 | P | 100.00 | 100.00 |
| RCA23_c29900 | magnesium-chelatase subunit BchH                                             | COG1429 | H | 100.00 | 100.00 |
| RCA23_c29910 | light-independent protochlorophyllide reductase subunit BchB                 | COG2710 | C | 100.00 | 100.00 |
| RCA23_c29920 | light-independent protochlorophyllide reductase subunit BchN                 | COG2710 | C | 100.00 | 100.00 |
| RCA23_c29930 | 2-vinyl bacteriochlorophyllide hydratase BchF                                |         |   | 100.00 | 100.00 |
| RCA23_c29940 | putative transcriptional regulator PpaA                                      |         |   | 100.00 | 100.00 |
| RCA23_c29950 | transcriptional regulator PpsR                                               | COG3829 | K | 100.00 | 100.00 |
| RCA23_c29960 | hypothetical protein                                                         | COG5012 | R | 100.00 | 100.00 |
| RCA23_c29970 | transcriptional regulator protein FixJ                                       | COG4566 | T | 100.00 | 100.00 |
| RCA23_c29980 | peripheral-type benzodiazepine receptor/signal transduction protein TspO     | COG3476 | T | 100.00 | 100.00 |
| RCA23_c29990 | hypothetical protein, integral membrane proteins YeeE/YedE                   | COG2391 | R | 100.00 | 100.00 |
| RCA23_c30000 | hypothetical protein, integral membrane proteins YeeE/YedE                   | COG2391 | R | 100.00 | 100.00 |
| RCA23_c30010 | putative beta-lactamase hydrolase-like protein                               | COG0491 | R | 100.00 | 100.00 |
| RCA23_c30020 | hypothetical protein                                                         | COG3453 | S | 100.00 | 100.00 |
| RCA23_c30030 | sulphate transporter                                                         | COG0659 | P | 100.00 | 100.00 |
| RCA23_c30040 | amidase                                                                      | COG0154 | J | 100.00 | 100.00 |
| RCA23_c30050 | hypothetical protein                                                         |         |   | 100.00 | 100.00 |
| RCA23_c30060 | aminoglycoside phosphotransferase Aph                                        |         |   | 100.00 | 100.00 |
| RCA23_c30070 | hypothetical protein                                                         | COG2885 | M | 100.00 | 100.00 |
| RCA23_c30080 | chaperone protein DnaJ                                                       | COG0484 | O | 100.00 | 100.00 |
| RCA23_c30090 | chaperone protein DnaK                                                       | COG0443 | O | 100.00 | 100.00 |
| RCA23_c30100 | putative alpha-ketoglutarate-dependent dioxygenase AlkB                      | COG3145 | L | 100.00 | 100.00 |
| RCA23_c30110 | putative ABC-2 type transporter                                              | COG1682 | G | 100.00 | 100.00 |
| RCA23_c30120 | 3'(2'),5'-bisphosphate nucleotidase CysQ                                     | COG1218 | P | 100.00 | 100.00 |
| RCA23_c30130 | UTP-glucose-1-phosphate uridylyltransferase GalU                             | COG1210 | M | 100.00 | 26.43  |
| RCA23_c30140 | hypothetical protein                                                         | COG0463 | M | 4.59   | 18.36  |

|              |                                                                |         |   |        |        |
|--------------|----------------------------------------------------------------|---------|---|--------|--------|
| RCA23_c30150 | hypothetical protein                                           |         |   | 0.00   | 53.82  |
| RCA23_c30160 | hypothetical protein beta-1,6-N-acetylglucosaminyltransferases |         |   | 0.00   | 6.85   |
| RCA23_c30170 | hypothetical protein                                           |         |   | 14.99  | 36.27  |
| RCA23_c30180 | nitrogen regulatory protein PtsN                               | COG1762 | G | 100.00 | 100.00 |
| RCA23_c30190 | putative sigma 54 modulation protein                           | COG1544 | J | 100.00 | 100.00 |
| RCA23_c30200 | lipopolysaccharide export system ATP-binding protein LptB      | COG1137 | R | 100.00 | 100.00 |
| RCA23_c30210 | putative lipopolysaccharide export system protein LptA         | COG1934 | S | 100.00 | 100.00 |
| RCA23_c30220 | hypothetical protein                                           |         |   | 100.00 | 100.00 |
| RCA23_c30230 | putative 3'-5'-exonuclease                                     | COG0349 | J | 100.00 | 94.63  |
| RCA23_c30240 | glycine amidinotransferase                                     | COG1834 | E | 100.00 | 100.00 |
| RCA23_c30250 | hypothetical protein                                           | COG4123 | R | 100.00 | 100.00 |
| RCA23_c30260 | hypothetical protein, metal-dependent phosphohydrolase         | COG1896 | R | 100.00 | 100.00 |
| RCA23_c30270 | S-adenosyl-L-homocysteine hydrolase AhcY                       | COG0499 | H | 100.00 | 100.00 |
| RCA23_c30280 | photosynthetic apparatus regulatory protein RegA               | COG4567 | T | 100.00 | 100.00 |
| RCA23_c30290 | protein SenC                                                   | COG1999 | R | 100.00 | 100.00 |
| RCA23_c30300 | sensor histidine kinase RegB                                   | COG0642 | T | 100.00 | 100.00 |
| RCA23_c30310 | hypothetical protein                                           |         |   | 100.00 | 100.00 |
| RCA23_c30320 | hypothetical protein, aminoglycoside phosphotransferase        | COG3178 | R | 100.00 | 98.19  |
| RCA23_c30330 | hypothetical protein, nucleotidyl transferase                  | COG1208 | M | 100.00 | 100.00 |
| RCA23_c30340 | double-strand break repair protein AddB                        | COG3893 | L | 100.00 | 100.00 |
| RCA23_c30350 | double-strand break repair helicase AddA                       | COG1074 | L | 97.97  | 100.00 |
| RCA23_c30360 | thioredoxin TrxA                                               | COG3118 | O | 100.00 | 100.00 |
| RCA23_c30370 | ATP-dependent protease HslV                                    | COG5405 | O | 100.00 | 100.00 |
| RCA23_c30380 | ATP-dependent hsl protease ATP-binding subunit HslU            | COG1220 | O | 100.00 | 96.87  |
| RCA23_c30390 | MFS-type transporter                                           | COG2814 | G | 100.00 | 100.00 |
| RCA23_c30400 | hypothetical protein, Smr protein/MutS2                        | COG2840 | S | 100.00 | 100.00 |
| RCA23_c30410 | putative lytic murein transglycosylase                         | COG2821 | M | 100.00 | 100.00 |
| RCA23_c30420 | hypothetical protein, TIM44                                    | COG4395 | S | 100.00 | 100.00 |
| RCA23_c30430 | putative cytoplasmic membrane protein FxsA                     | COG3030 | R | 100.00 | 100.00 |
| RCA23_c30440 | protein-export protein SecB                                    | COG1952 | U | 100.00 | 100.00 |
| RCA23_c30450 | DNA polymerase III subunit epsilon                             | COG0847 | L | 100.00 | 100.00 |
| RCA23_c30460 | dephospho-CoA kinase CoaE                                      | COG0237 | H | 100.00 | 100.00 |
| RCA23_c30470 | shikimate 5-dehydrogenase AroE                                 | COG0169 | E | 100.00 | 100.00 |

|              |                                                                       |         |   |        |        |
|--------------|-----------------------------------------------------------------------|---------|---|--------|--------|
| RCA23_c30480 | transcription termination factor Rho                                  | COG1158 | K | 100.00 | 100.00 |
| RCA23_c30490 | tRNA modification GTPase MnmE                                         | COG0486 | R | 100.00 | 100.00 |
| RCA23_c30500 | tRNA uridine 5-carboxymethylaminomethyl modification enzyme MnmG      | COG0445 | D | 100.00 | 99.84  |
| RCA23_c30510 | ribosomal RNA small subunit methyltransferase G                       | COG0357 | M | 100.00 | 100.00 |
| RCA23_c30520 | chromosome-partitioning protein ParA                                  | COG1192 | D | 100.00 | 100.00 |
| RCA23_c30530 | chromosome-partitioning protein ParB                                  | COG1475 | K | 100.00 | 100.00 |
| RCA23_c30540 | oxygen-independent coproporphyrinogen III oxidase HemN                | COG0635 | H | 100.00 | 100.00 |
| RCA23_c30550 | nucleoside-triphosphatase RdgB                                        | COG0127 | F | 100.00 | 100.00 |
| RCA23_c30560 | ribonuclease PH                                                       | COG0689 | J | 100.00 | 100.00 |
| RCA23_c30570 | heat-inducible transcription repressor HrcA                           | COG1420 | K | 100.00 | 100.00 |
| RCA23_c30580 | protein GrpE                                                          | COG0576 | O | 100.00 | 100.00 |
| RCA23_c30590 | DNA mismatch repair protein MutS                                      | COG0249 | L | 100.00 | 100.00 |
| RCA23_c30600 | NADP-dependent malic enzyme MaeB                                      | COG0281 | C | 100.00 | 98.05  |
| RCA23_c30610 | pfkB family carbohydrate kinase                                       | COG0524 | G | 100.00 | 100.00 |
| RCA23_c30620 | putative aminotransferase class IV                                    | COG0115 | E | 100.00 | 100.00 |
| RCA23_c30630 | hypothetical protein, branched-chain-amino-acid aminotransferase-like |         |   | 100.00 | 100.00 |
| RCA23_c30640 | argininosuccinate synthase ArgG                                       | COG0137 | E | 100.00 | 100.00 |
| RCA23_c30650 | threonine dehydratase, biosynthetic                                   | COG1171 | E | 100.00 | 100.00 |
| RCA23_c30660 | putative NUDIX hydrolase                                              | COG0494 | L | 100.00 | 100.00 |
| RCA23_c30670 | heat shock protein 33                                                 | COG1281 | O | 100.00 | 100.00 |
| RCA23_c30680 | putative NUDIX hydrolase                                              | COG0494 | L | 100.00 | 100.00 |
| RCA23_c30690 | hypothetical protein, poly A polymerase                               | COG0617 | J | 100.00 | 100.00 |
| RCA23_c30700 | ABC transporter ATP-binding/permease protein                          | COG1132 | V | 100.00 | 100.00 |
| RCA23_c30710 | hypothetical protein                                                  | COG2265 | J | 95.06  | 100.00 |
| RCA23_c30720 | ion transport protein                                                 |         |   | 2.89   | 100.00 |
| RCA23_c30730 | hypothetical protein                                                  | COG3034 | S | 100.00 | 100.00 |
| RCA23_c30740 | hypothetical protein, SCP-like extracellular protein                  | COG2340 | S | 100.00 | 100.00 |
| RCA23_c30750 | hypothetical protein                                                  | COG1376 | S | 100.00 | 100.00 |
| RCA23_c30760 | ferrochelataase HemH                                                  | COG0276 | H | 100.00 | 100.00 |
| RCA23_c30770 | hypothetical protein                                                  |         |   | 100.00 | 100.00 |
| RCA23_c30780 | hypothetical protein, ComF/GntX family                                | COG1040 | R | 100.00 | 100.00 |
| RCA23_c30790 | glutaredoxin GrxC                                                     | COG0695 | O | 100.00 | 100.00 |
| RCA23_c30800 | putative carbon-nitrogen hydrolase                                    | COG0388 | R | 100.00 | 100.00 |

|              |                                                            |         |   |        |        |
|--------------|------------------------------------------------------------|---------|---|--------|--------|
| RCA23_c30810 | putative HTH-type transcriptional regulator, MarR family   | COG1846 | K | 100.00 | 100.00 |
| RCA23_c30820 | 3-demethylubiquinone-9 3-O-methyltransferase UbiG          | COG2227 | H | 100.00 | 100.00 |
| RCA23_c30830 | proline iminopeptidase Pip                                 | COG0596 | R | 100.00 | 94.74  |
| RCA23_c30840 | putative peptide transport system permease protein         | COG0601 | E | 100.00 | 100.00 |
| RCA23_c30850 | putative peptide transport system permease protein         | COG1173 | E | 100.00 | 100.00 |
| RCA23_c30860 | peptide transport system ATP-binding protein               | COG1123 | R | 100.00 | 100.00 |
| RCA23_c30870 | putative periplasmic peptide-binding protein               | COG0747 | E | 100.00 | 97.48  |
| RCA23_c30880 | hypothetical protein UPF0090                               | COG0779 | S | 100.00 | 100.00 |
| RCA23_c30890 | transcription elongation protein NusA                      | COG0195 | K | 100.00 | 100.00 |
| RCA23_c30900 | hypothetical protein DUF448                                | COG2740 | K | 100.00 | 100.00 |
| RCA23_c30910 | translation initiation factor IF-2                         | COG0532 | J | 100.00 | 100.00 |
| RCA23_c30920 | putative mutator MutT protein                              | COG1051 | F | 100.00 | 100.00 |
| RCA23_c30930 | arginine biosynthesis bifunctional protein ArgJ            | COG1364 | E | 100.00 | 100.00 |
| RCA23_c30940 | putative peptidylprolyl isomerase                          | COG0760 | O | 100.00 | 100.00 |
| RCA23_c30950 | protein translocase subunit SecA                           | COG0653 | U | 100.00 | 100.00 |
| RCA23_c30960 | putative O-acetyltransferase OatA                          | COG1835 | I | 87.06  | 100.00 |
| RCA23_c30970 | hypothetical protein                                       | COG4922 | S | 100.00 | 100.00 |
| RCA23_c30980 | hypothetical protein, transcriptional regulator-like       | COG1733 | K | 100.00 | 100.00 |
| RCA23_c30990 | UDP-glucuronate 5'-epimerase LspL                          | COG0451 | M | 62.96  | 96.49  |
| RCA23_c31000 | hypothetical protein                                       |         |   | 100.00 | 98.60  |
| RCA23_c31010 | phosphoglucosamine mutase GlmM                             | COG1109 | G | 100.00 | 100.00 |
| RCA23_c31020 | putative ubiquinone biosynthesis protein UbiB              | COG0661 | R | 100.00 | 100.00 |
| RCA23_c31030 | ubiquinone/menaquinone biosynthesis methyltransferase UbiE | COG2226 | H | 100.00 | 100.00 |
| RCA23_c31040 | formamidopyrimidine-DNA glycosylase MutM                   | COG0266 | L | 100.00 | 100.00 |
| RCA23_c31050 | enoyl-CoA hydratase/isomerase                              | COG1024 | I | 100.00 | 100.00 |
| RCA23_c31060 | 30S ribosomal protein S20                                  | COG0268 | J | 100.00 | 100.00 |
